# Supplementary material for: Induction and maintenance of mucosal healing in Crohn’s disease with ustekinumab in clinical practice across all care levels in Germany (MUCUS)
Source: PubMed Central journal article supplement (PMC11371836; doi:10.1038/s41598-024-70241-9), 2024-09-03
Supplement: 41598_2024_70241_MOESM2_ESM.pdf [file 41598_2024_70241_MOESM2_ESM.pdf]

Table of Contents

| Item                                                                                                                | Page Number |
|---------------------------------------------------------------------------------------------------------------------|-------------|
| 14.1.1 - Subject Disposition                                                                                        | 3           |
| 14.1.2.1 - Summary of Demographic and Baseline Disease Characteristics: Safety Population                           | 4           |
| 14.1.2.2 - Summary of Demographic and Baseline Disease Characteristics: ITT Population                              | 7           |
| 14.1.3 - Summary of Treatment Compliances                                                                           | 10          |
| 14.1.4 - Summary of Medical History by SOC and PT                                                                   | 11          |
| 14.1.5 - Summary of Prior Medications                                                                               | 17          |
| 14.1.6 - Summary of Concomitant Medications                                                                         | 19          |
| 14.1.7 - Summary of Protocol Deviations                                                                             | 26          |
| 14.2.1.1 - Summary of Clinical Response and Endoscopic Response at Week 52: ITT Population                          | 27          |
| 14.2.1.2 - Summary of Clinical Response and Endoscopic Response at Week 52: PP Population                           | 28          |
| 14.2.1.3 - Summary of Clinical Response and Endoscopic Response at Week 52 Gender Subgroup Analysis: ITT Population | 29          |
| 14.2.2 - Summary of Clinical Response at Week 52: ITT Population                                                    | 30          |
| 14.2.3.1 - Summary of Endoscopic Response at Week 52: ITT Population                                                | 31          |
| 14.2.3.2 - Summary of Endoscopic Response at Week 52: Per-Protocol Analysis Set                                     | 32          |
| 14.2.4.1 - Summary of Endoscopic Remission at Week 26 and 52: ITT Population                                        | 33          |
| 14.2.4.2 - Summary of Endoscopic Remission at Week 26 and 52: Per-Protocol Analysis Set                             | 34          |
| 14.2.5.1 - Summary of Mucosal Healing Rate at Week 26 and 52: ITT Population                                        | 35          |
| 14.2.5.2 - Summary of Mucosal Healing Rate at Week 26 and 52: Per-Protocol Analysis Set                             | 36          |
| 14.2.6 - Summary of Clinical Remission at Week 8, 16, 26, 36, 52: ITT Population                                    | 37          |
| 14.2.7 - Summary of Steroid Free Clinical Remission at Week 8, 16, 26, 36, 52                                       | 39          |
| 14.2.8.1 - Summary of Fistula Response at Week 8, 16, 26, 36, 52                                                    | 41          |
| 14.2.8.2 - Summary of Fistula Remission at Week 8, 16, 26, 36, 52                                                   | 43          |
| 14.2.9 - Summary of Mean Change in PDAI Score from Baseline at Week 8, 16, 26, 36, 52                               | 45          |
| 14.2.10 - Summary of Mean Change in HBI Index from Baseline at Week 8, 16, 26, 36, 52                               | 48          |
| 14.2.11 - Summary of Mean Change in SES-CD Score from Baseline at Week 26 and 52                                    | 51          |
| 14.2.12 - Summary of Mean Change hs-CRP Concentration from Baseline at week 8, 16, 26, 36, 52                       | 53          |
| 14.2.13 - Summary of Mean Change Albumin Concentration from Baseline at week 8, 16, 26, 36, 52                      | 56          |
| 14.2.14 - Summary of Mean Change Fecal Calprotectin Concentration from Baseline at week 8, 16, 26, 36, 52           | 59          |
| 14.2.15 - Summary of Mean Change in EQ-5D-5L from Baseline at Weeks 8, 16, 26, 36, 52                               | 62          |
| 14.2.16 - Summary of Mean Change in PRO-2 from Baseline at Weeks 8, 16, 26, 36, 52                                  | 65          |
| 14.2.17 - Summary of PRO-2 Remission at Weeks 0, 8, 16, 26, 36, 52                                                  | 68          |
| 14.3.1.1 - Overall Summary of AEs                                                                                   | 70          |
| 14.3.1.2 - Summary of TEAEs by SOC and PT                                                                           | 71          |
| 14.3.1.3 - Summary of TEAEs by SOC, PT and Max Severity                                                             | 75          |
| 14.3.1.4 - Summary of Severe (CTCAE Grade $\geq$ 3) TEAEs by SOC and PT                                             | 88          |
| 14.3.1.5 - Summary of Related TEAEs by SOC and PT                                                                   | 89          |

Table of Contents

| Item                                                                                                          | Page Number |
|---------------------------------------------------------------------------------------------------------------|-------------|
| 14.3.1.6 - Summary of Serious TEAEs by SOC and PT                                                             | 90          |
| 14.3.1.7 - Summary of Related Serious TEAEs by SOC and PT                                                     | 91          |
| 14.3.1.8 - Summary of Infusion Reaction TEAEs by SOC and PT                                                   | 92          |
| 14.3.1.9 - Summary of Injection-Site Reaction TEAEs by SOC and PT                                             | 93          |
| 14.3.1.10 - Summary of Infection TEAEs by SOC and PT                                                          | 94          |
| 14.3.1.11 - Summary of Steroid Tapering at Week 0, 8 ,16, 26, 36, 52                                          | 95          |
| 14.3.1.12 - Summary of Montreal Classification Phenotype at Week 0, 8 ,16, 26, 36, 52                         | 96          |
| 14.3.1.13 - Summary of Extraintestinal Manifestations at Week 0, 8 ,16, 26, 36, 52                            | 100         |
| 14.3.1.14 - Summary of Crohn's Related Hospitalizations                                                       | 102         |
| 14.3.1.15 - Summary of Crohn's Related Surgery                                                                | 103         |
| 14.3.5.1 - Summary of Vital Signs                                                                             | 104         |
| 14.3.5.2 - Summary of Clinical Laboratory Test Results                                                        | 135         |
| 14.4.1 - Time to CD-Related Hospitalization                                                                   | 201         |
| 14.4.2 - Time to CD-Related Surgery                                                                           | 202         |
| 14.4.3 - Summary of Clinical Response and Endoscopic Response Exploratory Analysis at Week 52: ITT Population | 203         |

Table 14.1.1: Subject Disposition

|                                        | Naive<br>(N=13) | Biologic<br>(N=22) | Multiple Biologic<br>(N=17) | Total<br>(N=52) |
|----------------------------------------|-----------------|--------------------|-----------------------------|-----------------|
| Study Disposition: n (%)               |                 |                    |                             |                 |
| Screened                               |                 |                    |                             | 79              |
| Screen Failed                          |                 |                    |                             | 27              |
| Randomized                             | 13              | 22                 | 17                          | 52              |
| Discontinued from Study                | 3 (23.1%)       | 8 (36.4%)          | 7 (41.2%)                   | 18 (34.6%)      |
| Completed Study                        | 10 (76.9%)      | 14 (63.6%)         | 10 (58.8%)                  | 34 (65.4%)      |
| Eligible for Safety Analysis Set       | 13 (100.0%)     | 22 (100.0%)        | 17 (100.0%)                 | 52 (100.0%)     |
| Eligible for ITT Analysis Set          | 13 (100.0%)     | 22 (100.0%)        | 17 (100.0%)                 | 52 (100.0%)     |
| Eligible for Per-Protocol Analysis Set | 6 (46.2%)       | 11 (50.0%)         | 8 (47.1%)                   | 25 (48.1%)      |
| Reasons for Discontinuation: n (%)     | 3 (23.1%)       | 8 (36.4%)          | 7 (41.2%)                   | 18 (34.6%)      |
| Adverse Event                          | 1 (7.7%)        | 1 (4.5%)           | 1 (5.9%)                    | 3 (5.8%)        |
| Lost to Follow-Up                      | -               | -                  | 3 (17.6%)                   | 3 (5.8%)        |
| Non-HBI Responder                      | 1 (7.7%)        | 3 (13.6%)          | 1 (5.9%)                    | 5 (9.6%)        |
| Other                                  | -               | 1 (4.5%)           | 1 (5.9%)                    | 2 (3.8%)        |
| Pregnancy                              | -               | 1 (4.5%)           | -                           | 1 (1.9%)        |
| Subject Decision                       | 1 (7.7%)        | 2 (9.1%)           | 1 (5.9%)                    | 4 (7.7%)        |

Abbreviations: ITT, Intent-to-Treat Analysis set; N, number of randomized subjects; n, number of subjects within each category; HBI, Harvey Bradshaw Index.

Program Name: MUCUS-Shell11-V01

Output Location: .\Output\Shared\MUCUS-TFLS-Final-27MAR24-V01.pdf

Table 14.1.2.1: Summary of Demographic and Baseline Disease Characteristics: Safety Population

|                                                        | Naive<br>(N=13)  | Biologic<br>(N=22) | Multiple Biologic<br>(N=17) | Total<br>(N=52)  |
|--------------------------------------------------------|------------------|--------------------|-----------------------------|------------------|
| Gender: n(%)                                           |                  |                    |                             |                  |
| Female                                                 | 8 (61.5%)        | 14 (63.6%)         | 6 (35.3%)                   | 28 (53.8%)       |
| Male                                                   | 5 (38.5%)        | 8 (36.4%)          | 11 (64.7%)                  | 24 (46.2%)       |
| Age: (yrs.)                                            |                  |                    |                             |                  |
| n                                                      | 13               | 22                 | 17                          | 52               |
| Mean (SD)                                              | 39.0 (15.25)     | 40.3 (12.01)       | 39.5 (10.43)                | 39.7 (12.19)     |
| Median (min, max)                                      | 39.2 (20, 64)    | 36.7 (21, 74)      | 42.4 (21, 57)               | 39.3 (20, 74)    |
| Race: n(%)                                             |                  |                    |                             |                  |
| White                                                  | 13 (100.0%)      | 22 (100.0%)        | 17 (100.0%)                 | 52 (100.0%)      |
| Prior Crohn's Surgery: n(%)                            |                  |                    |                             |                  |
| Yes                                                    | -                | 3 (13.6%)          | 4 (23.5%)                   | 7 (13.5%)        |
| No                                                     | 13 (100.0%)      | 19 (86.4%)         | 13 (76.5%)                  | 45 (86.5%)       |
| Concomitant Monotherapy Immunomodulators: n(%)         |                  |                    |                             |                  |
| Yes                                                    | -                | 2 (9.1%)           | 1 (5.9%)                    | 3 (5.8%)         |
| No                                                     | 13 (100.0%)      | 20 (90.9%)         | 16 (94.1%)                  | 49 (94.2%)       |
| Concomitant Combination Therapy Immunomodulators: n(%) |                  |                    |                             |                  |
| Yes                                                    | -                | -                  | -                           | -                |
| No                                                     | 13 (100.0%)      | 22 (100.0%)        | 17 (100.0%)                 | 52 (100.0%)      |
| Fistulizing Crohn's: n(%)                              |                  |                    |                             |                  |
| Yes                                                    | -                | 2 (9.1%)           | 5 (29.4%)                   | 7 (13.5%)        |
| No                                                     | 13 (100.0%)      | 20 (90.9%)         | 12 (70.6%)                  | 45 (86.5%)       |
| Weight: (kg)                                           |                  |                    |                             |                  |
| n                                                      | 12               | 20                 | 15                          | 47               |
| Mean (SD)                                              | 73.0 (17.01)     | 72.8 (14.68)       | 72.3 (16.09)                | 72.7 (15.40)     |
| Median (min, max)                                      | 79.5 (39, 93)    | 68.0 (51, 103)     | 72.0 (47, 106)              | 72.0 (39, 106)   |
| Height: (cm)                                           |                  |                    |                             |                  |
| n                                                      | 12               | 20                 | 16                          | 48               |
| Mean (SD)                                              | 173.3 (14.89)    | 171.3 (10.61)      | 173.5 (7.80)                | 172.5 (10.86)    |
| Median (min, max)                                      | 169.0 (147, 195) | 169.0 (157, 192)   | 172.0 (161, 195)            | 171.0 (147, 195) |
| Body Mass Index: (kg/m <sup>2</sup> )                  |                  |                    |                             |                  |

Abbreviations: ITT, Intent-to-Treat Analysis set; N, number of randomized subjects; n, number of subjects within each category; HBI, Harvey Bradshaw Index; PDAI, perianal activity index; PRO-2, patient reported outcomes assesment; Immunomodulators, azathioprine, mercaptopurine or methotrexate.

Program Name: MUCUS-Shell2-V01

Output Location: .\Output\Shared\MUCUS-TFLS-Final-27MAR24-V01.pdf

Table 14.1.2.1: Summary of Demographic and Baseline Disease Characteristics: Safety Population

|                                      | Naive<br>(N=13)  | Biologic<br>(N=22) | Multiple Biologic<br>(N=17) | Total<br>(N=52) |
|--------------------------------------|------------------|--------------------|-----------------------------|-----------------|
| n                                    | 12               | 20                 | 15                          | 47              |
| Mean (SD)                            | 24.2 (4.93)      | 24.7 (3.59)        | 23.8 (4.46)                 | 24.3 (4.16)     |
| Median (min, max)                    | 23.5 (18, 34)    | 23.7 (19, 33)      | 22.4 (17, 32)               | 23.3 (17, 34)   |
| Extraintestinal Manifestations: n(%) |                  |                    |                             |                 |
| Yes                                  | 5 (38.5%)        | 5 (22.7%)          | 4 (23.5%)                   | 14 (26.9%)      |
| No                                   | 8 (61.5%)        | 17 (77.3%)         | 13 (76.5%)                  | 38 (73.1%)      |
| Baseline HBI:                        |                  |                    |                             |                 |
| n                                    | 13               | 21                 | 16                          | 50              |
| Mean (SD)                            | 9.4 (4.84)       | 8.8 (3.34)         | 10.4 (5.02)                 | 9.5 (4.30)      |
| Median (min, max)                    | 8.0 (5, 23)      | 7.0 (3, 15)        | 8.5 (5, 19)                 | 8.0 (3, 23)     |
| Baseline SES-CD:                     |                  |                    |                             |                 |
| n                                    | 12               | 21                 | 16                          | 49              |
| Mean (SD)                            | 9.4 (5.43)       | 8.5 (4.91)         | 14.4 (6.35)                 | 10.7 (6.03)     |
| Median (min, max)                    | 9.5 (3, 21)      | 7.0 (3, 20)        | 15.0 (5, 24)                | 9.0 (3, 24)     |
| Baseline C-reactive Protein:         |                  |                    |                             |                 |
| n                                    | 13               | 22                 | 17                          | 52              |
| Mean (SD)                            | 18.1 (16.75)     | 19.8 (29.56)       | 35.3 (49.40)                | 24.4 (35.36)    |
| Median (min, max)                    | 12.6 (1, 52)     | 7.4 (1, 113)       | 25.9 (0, 210)               | 10.6 (0, 210)   |
| Baseline Fecal CalProtectin:         |                  |                    |                             |                 |
| n                                    | 12               | 20                 | 15                          | 47              |
| Mean (SD)                            | 648.0 (791.44)   | 875.3 (954.21)     | 1170.5 (986.69)             | 911.5 (928.83)  |
| Median (min, max)                    | 247.0 (50, 2000) | 584.5 (5, 4030)    | 800.0 (15, 3000)            | 504.0 (5, 4030) |
| Baseline PDAI:                       |                  |                    |                             |                 |
| n                                    | 13               | 22                 | 16                          | 51              |
| Mean (SD)                            | 0.0 (0.00)       | 0.9 (3.12)         | 2.7 (4.98)                  | 1.2 (3.56)      |
| Median (min, max)                    | 0.0 (0, 0)       | 0.0 (0, 14)        | 0.0 (0, 17)                 | 0.0 (0, 17)     |
| Baseline EQ-5D-5L:                   |                  |                    |                             |                 |
| n                                    | 12               | 21                 | 15                          | 48              |
| Mean (SD)                            | 0.7 (0.30)       | 0.7 (0.25)         | 0.7 (0.39)                  | 0.7 (0.31)      |
| Median (min, max)                    | 0.8 (0, 1)       | 0.8 (0, 1)         | 0.7 (-1, 1)                 | 0.8 (-1, 1)     |

Abbreviations: ITT, Intent-to-Treat Analysis set; N, number of randomized subjects; n, number of subjects within each category; HBI, Harvey Bradshaw Index; PDAI, perianal activity index; PRO-2, patient reported outcomes assesment; Immunomodulators, azathioprine, mercaptopurine or methotrexate.

Table 14.1.2.1: Summary of Demographic and Baseline Disease Characteristics: Safety Population

|                                        | Naive<br>(N=13) | Biologic<br>(N=22) | Multiple Biologic<br>(N=17) | Total<br>(N=52) |
|----------------------------------------|-----------------|--------------------|-----------------------------|-----------------|
| <b>Baseline PRO-2:</b>                 |                 |                    |                             |                 |
| n                                      | 11              | 22                 | 13                          | 46              |
| Mean (SD)                              | 89.3 (74.56)    | 113.5 (53.01)      | 135.6 (140.49)              | 113.9 (89.97)   |
| Median (min, max)                      | 67.0 (2, 278)   | 110.0 (21, 203)    | 76.0 (0, 520)               | 87.0 (0, 520)   |
| <b>Age at Diagnosis: n(%)</b>          |                 |                    |                             |                 |
| <16yrs                                 | 1 (7.7%)        | 3 (13.6%)          | 2 (11.8%)                   | 6 (11.5%)       |
| 16-40yrs                               | 10 (76.9%)      | 14 (63.6%)         | 14 (82.4%)                  | 38 (73.1%)      |
| >40yrs                                 | 2 (15.4%)       | 5 (22.7%)          | 1 (5.9%)                    | 8 (15.4%)       |
| <b>Location: n(%)</b>                  |                 |                    |                             |                 |
| Ileal                                  | 2 (15.4%)       | 4 (18.2%)          | 1 (5.9%)                    | 7 (13.5%)       |
| Colonic                                | 5 (38.5%)       | 3 (13.6%)          | 7 (41.2%)                   | 15 (28.8%)      |
| Ileocolonic                            | 4 (30.8%)       | 11 (50.0%)         | 9 (52.9%)                   | 24 (46.2%)      |
| Isolated Upper disease                 | 2 (15.4%)       | 4 (18.2%)          | -                           | 6 (11.5%)       |
| <b>Behaviour: n(%)</b>                 |                 |                    |                             |                 |
| Nonstricturing, Nonpenetrating         | 9 (69.2%)       | 12 (54.5%)         | 10 (58.8%)                  | 31 (59.6%)      |
| Stricturing                            | 2 (15.4%)       | 7 (31.8%)          | 3 (17.6%)                   | 12 (23.1%)      |
| Penetrating                            | 2 (15.4%)       | 3 (13.6%)          | 4 (23.5%)                   | 9 (17.3%)       |
| <b>Perianal disease modifier: n(%)</b> |                 |                    |                             |                 |
| Yes                                    | -               | 2 (9.1%)           | 2 (11.8%)                   | 4 (7.7%)        |
| No                                     | 13 (100.0%)     | 20 (90.9%)         | 15 (88.2%)                  | 48 (92.3%)      |

Abbreviations: ITT, Intent-to-Treat Analysis set; N, number of randomized subjects; n, number of subjects within each category; HBI, Harvey Bradshaw Index; PDAI, perianal activity index; PRO-2, patient reported outcomes assesment; Immunomodulators, azathioprine, mercaptopurine or methotrexate.

Program Name: MUCUS-Shell2-V01  
 Output Location: .\Output\Shared\MUCUS-TFLS-Final-27MAR24-V01.pdf

Table 14.1.2.2: Summary of Demographic and Baseline Disease Characteristics: ITT Population

|                                                        | Naive<br>(N=13)  | Biologic<br>(N=22) | Multiple Biologic<br>(N=17) | Total<br>(N=52)  |
|--------------------------------------------------------|------------------|--------------------|-----------------------------|------------------|
| Gender: n(%)                                           |                  |                    |                             |                  |
| Female                                                 | 8 (61.5%)        | 14 (63.6%)         | 6 (35.3%)                   | 28 (53.8%)       |
| Male                                                   | 5 (38.5%)        | 8 (36.4%)          | 11 (64.7%)                  | 24 (46.2%)       |
| Age: (yrs.)                                            |                  |                    |                             |                  |
| n                                                      | 13               | 22                 | 17                          | 52               |
| Mean (SD)                                              | 39.0 (15.25)     | 40.3 (12.01)       | 39.5 (10.43)                | 39.7 (12.19)     |
| Median (min, max)                                      | 39.2 (20, 64)    | 36.7 (21, 74)      | 42.4 (21, 57)               | 39.3 (20, 74)    |
| Race: n(%)                                             |                  |                    |                             |                  |
| White                                                  | 13 (100.0%)      | 22 (100.0%)        | 17 (100.0%)                 | 52 (100.0%)      |
| Prior Crohn's Surgery: n(%)                            |                  |                    |                             |                  |
| Yes                                                    | -                | 3 (13.6%)          | 4 (23.5%)                   | 7 (13.5%)        |
| No                                                     | 13 (100.0%)      | 19 (86.4%)         | 13 (76.5%)                  | 45 (86.5%)       |
| Concomitant Monotherapy Immunomodulators: n(%)         |                  |                    |                             |                  |
| Yes                                                    | -                | 2 (9.1%)           | 1 (5.9%)                    | 3 (5.8%)         |
| No                                                     | 13 (100.0%)      | 20 (90.9%)         | 16 (94.1%)                  | 49 (94.2%)       |
| Concomitant Combination Therapy Immunomodulators: n(%) |                  |                    |                             |                  |
| Yes                                                    | -                | -                  | -                           | -                |
| No                                                     | 13 (100.0%)      | 22 (100.0%)        | 17 (100.0%)                 | 52 (100.0%)      |
| Fistulizing Crohn's: n(%)                              |                  |                    |                             |                  |
| Yes                                                    | -                | 2 (9.1%)           | 5 (29.4%)                   | 7 (13.5%)        |
| No                                                     | 13 (100.0%)      | 20 (90.9%)         | 12 (70.6%)                  | 45 (86.5%)       |
| Weight: (kg)                                           |                  |                    |                             |                  |
| n                                                      | 12               | 20                 | 15                          | 47               |
| Mean (SD)                                              | 73.0 (17.01)     | 72.8 (14.68)       | 72.3 (16.09)                | 72.7 (15.40)     |
| Median (min, max)                                      | 79.5 (39, 93)    | 68.0 (51, 103)     | 72.0 (47, 106)              | 72.0 (39, 106)   |
| Height: (cm)                                           |                  |                    |                             |                  |
| n                                                      | 12               | 20                 | 16                          | 48               |
| Mean (SD)                                              | 173.3 (14.89)    | 171.3 (10.61)      | 173.5 (7.80)                | 172.5 (10.86)    |
| Median (min, max)                                      | 169.0 (147, 195) | 169.0 (157, 192)   | 172.0 (161, 195)            | 171.0 (147, 195) |
| Body Mass Index: (kg/m <sup>2</sup> )                  |                  |                    |                             |                  |

Abbreviations: N, number of randomized subjects; n, number of subjects within each category; HBI, Harvey Bradshaw Index; PDAI, perianal activity index; PRO-2, patient reported outcomes assessment; Immunomodulators, azathioprine, mercaptopurine or methotrexate.

Program Name: MUCUS-Shell2-V01

Output Location: .\Output\Shared\MUCUS-TFLS-Final-27MAR24-V01.pdf

Table 14.1.2.2: Summary of Demographic and Baseline Disease Characteristics: ITT Population

|                                      | Naive<br>(N=13)  | Biologic<br>(N=22) | Multiple Biologic<br>(N=17) | Total<br>(N=52) |
|--------------------------------------|------------------|--------------------|-----------------------------|-----------------|
| n                                    | 12               | 20                 | 15                          | 47              |
| Mean (SD)                            | 24.2 (4.93)      | 24.7 (3.59)        | 23.8 (4.46)                 | 24.3 (4.16)     |
| Median (min, max)                    | 23.5 (18, 34)    | 23.7 (19, 33)      | 22.4 (17, 32)               | 23.3 (17, 34)   |
| Extraintestinal Manifestations: n(%) |                  |                    |                             |                 |
| Yes                                  | 5 (38.5%)        | 5 (22.7%)          | 4 (23.5%)                   | 14 (26.9%)      |
| No                                   | 8 (61.5%)        | 17 (77.3%)         | 13 (76.5%)                  | 38 (73.1%)      |
| Baseline HBI:                        |                  |                    |                             |                 |
| n                                    | 13               | 21                 | 16                          | 50              |
| Mean (SD)                            | 9.4 (4.84)       | 8.8 (3.34)         | 10.4 (5.02)                 | 9.5 (4.30)      |
| Median (min, max)                    | 8.0 (5, 23)      | 7.0 (3, 15)        | 8.5 (5, 19)                 | 8.0 (3, 23)     |
| Baseline SES-CD:                     |                  |                    |                             |                 |
| n                                    | 12               | 21                 | 16                          | 49              |
| Mean (SD)                            | 9.4 (5.43)       | 8.5 (4.91)         | 14.4 (6.35)                 | 10.7 (6.03)     |
| Median (min, max)                    | 9.5 (3, 21)      | 7.0 (3, 20)        | 15.0 (5, 24)                | 9.0 (3, 24)     |
| Baseline C-reactive Protein:         |                  |                    |                             |                 |
| n                                    | 13               | 22                 | 17                          | 52              |
| Mean (SD)                            | 18.1 (16.75)     | 19.8 (29.56)       | 35.3 (49.40)                | 24.4 (35.36)    |
| Median (min, max)                    | 12.6 (1, 52)     | 7.4 (1, 113)       | 25.9 (0, 210)               | 10.6 (0, 210)   |
| Baseline Fecal CalProtectin:         |                  |                    |                             |                 |
| n                                    | 12               | 20                 | 15                          | 47              |
| Mean (SD)                            | 648.0 (791.44)   | 875.3 (954.21)     | 1170.5 (986.69)             | 911.5 (928.83)  |
| Median (min, max)                    | 247.0 (50, 2000) | 584.5 (5, 4030)    | 800.0 (15, 3000)            | 504.0 (5, 4030) |
| Baseline PDAI:                       |                  |                    |                             |                 |
| n                                    | 13               | 22                 | 16                          | 51              |
| Mean (SD)                            | 0.0 (0.00)       | 0.9 (3.12)         | 2.7 (4.98)                  | 1.2 (3.56)      |
| Median (min, max)                    | 0.0 (0, 0)       | 0.0 (0, 14)        | 0.0 (0, 17)                 | 0.0 (0, 17)     |
| Baseline EQ-5D-5L:                   |                  |                    |                             |                 |
| n                                    | 12               | 21                 | 15                          | 48              |
| Mean (SD)                            | 0.7 (0.30)       | 0.7 (0.25)         | 0.7 (0.39)                  | 0.7 (0.31)      |
| Median (min, max)                    | 0.8 (0, 1)       | 0.8 (0, 1)         | 0.7 (-1, 1)                 | 0.8 (-1, 1)     |

Abbreviations: N, number of randomized subjects; n, number of subjects within each category; HBI, Harvey Bradshaw Index; PDAI, perianal activity index; PRO-2, patient reported outcomes assesment; Immunomodulators, azathioprine, mercaptopurine or methotrexate.



Table 14.1.2.2: Summary of Demographic and Baseline Disease Characteristics: ITT Population

|                                        | Naive<br>(N=13) | Biologic<br>(N=22) | Multiple Biologic<br>(N=17) | Total<br>(N=52) |
|----------------------------------------|-----------------|--------------------|-----------------------------|-----------------|
| <b>Baseline PRO-2:</b>                 |                 |                    |                             |                 |
| n                                      | 11              | 22                 | 13                          | 46              |
| Mean (SD)                              | 89.3 (74.56)    | 113.5 (53.01)      | 135.6 (140.49)              | 113.9 (89.97)   |
| Median (min, max)                      | 67.0 (2, 278)   | 110.0 (21, 203)    | 76.0 (0, 520)               | 87.0 (0, 520)   |
| <b>Age at Diagnosis: n(%)</b>          |                 |                    |                             |                 |
| <16yrs                                 | 1 (7.7%)        | 3 (13.6%)          | 2 (11.8%)                   | 6 (11.5%)       |
| 16-40yrs                               | 10 (76.9%)      | 14 (63.6%)         | 14 (82.4%)                  | 38 (73.1%)      |
| >40yrs                                 | 2 (15.4%)       | 5 (22.7%)          | 1 (5.9%)                    | 8 (15.4%)       |
| <b>Location: n(%)</b>                  |                 |                    |                             |                 |
| Ileal                                  | 2 (15.4%)       | 4 (18.2%)          | 1 (5.9%)                    | 7 (13.5%)       |
| Colonic                                | 5 (38.5%)       | 3 (13.6%)          | 7 (41.2%)                   | 15 (28.8%)      |
| Ileocolonic                            | 4 (30.8%)       | 11 (50.0%)         | 9 (52.9%)                   | 24 (46.2%)      |
| Isolated Upper disease                 | 2 (15.4%)       | 4 (18.2%)          | -                           | 6 (11.5%)       |
| <b>Behaviour: n(%)</b>                 |                 |                    |                             |                 |
| Nonstricturing, Nonpenetrating         | 9 (69.2%)       | 12 (54.5%)         | 10 (58.8%)                  | 31 (59.6%)      |
| Stricturing                            | 2 (15.4%)       | 7 (31.8%)          | 3 (17.6%)                   | 12 (23.1%)      |
| Penetrating                            | 2 (15.4%)       | 3 (13.6%)          | 4 (23.5%)                   | 9 (17.3%)       |
| <b>Perianal disease modifier: n(%)</b> |                 |                    |                             |                 |
| Yes                                    | -               | 2 (9.1%)           | 2 (11.8%)                   | 4 (7.7%)        |
| No                                     | 13 (100.0%)     | 20 (90.9%)         | 15 (88.2%)                  | 48 (92.3%)      |

Abbreviations: N, number of randomized subjects; n, number of subjects within each category; HBI, Harvey Bradshaw Index; PDAI, perianal activity index; PRO-2, patient reported outcomes assesment; Immunomodulators, azathioprine, mercaptopurine or methotrexate.

Table 14.1.3: Summary of Treatment Compliances

|                                                | Naive<br>(N=13) | Biologic<br>(N=22) | Multiple Biologic<br>(N=17) |
|------------------------------------------------|-----------------|--------------------|-----------------------------|
| Number of Injections Administered:             |                 |                    |                             |
| N                                              | 13              | 22                 | 17                          |
| Mean (SD)                                      | 6.8 (2.35)      | 5.9 (2.55)         | 6.1 (2.99)                  |
| Median (Min, Max)                              | 7.0 (1, 9)      | 6.0 (1, 10)        | 6.0 (1, 11)                 |
| Number of Subjects who received > 6 injections | 10 (76.9%)      | 8 (36.4%)          | 8 (47.1%)                   |
| Number of Subjects who received 6 injections   | 1 (7.7%)        | 5 (22.7%)          | 3 (17.6%)                   |
| Number of Subjects who received < 6 injections | 2 (15.4%)       | 9 (40.9%)          | 6 (35.3%)                   |

Abbreviations: N, number of randomized subjects; n, number of subjects within each category; SD, Standard Deviation; min, minimum; max, maximum.

Program Name: MUCUS-Shell13-V01

Output Location: .\Output\Shared\MUCUS-TFLS-Final-27MAR24-V01.pdf

Table 14.1.4: Summary of Medical History by SOC and PT

|                                            | Naive<br>(N=13) | Biologic<br>(N=22) | Multiple Biologic<br>(N=17) |
|--------------------------------------------|-----------------|--------------------|-----------------------------|
| Subjects with >= 1 Medical History Event   | 13 (100.0%)     | 22 (100.0%)        | 17 (100.0%)                 |
| Blood and lymphatic system disorders       | 3 (23.1%)       | 3 (13.6%)          | 2 (11.8%)                   |
| Abdominal lymphadenopathy                  | -               | -                  | 1 (5.9%)                    |
| Anaemia                                    | 1 (7.7%)        | -                  | -                           |
| Iron deficiency anaemia                    | 2 (15.4%)       | 2 (9.1%)           | -                           |
| Lymphadenopathy                            | -               | -                  | 1 (5.9%)                    |
| Spherocytic anaemia                        | -               | 1 (4.5%)           | -                           |
| Cardiac disorders                          | 2 (15.4%)       | 3 (13.6%)          | 1 (5.9%)                    |
| Acute myocardial infarction                | -               | -                  | 1 (5.9%)                    |
| Arrhythmia                                 | 1 (7.7%)        | -                  | -                           |
| Coronary artery disease                    | -               | -                  | 1 (5.9%)                    |
| Myocardial infarction                      | 1 (7.7%)        | -                  | -                           |
| Sinus tachycardia                          | -               | 2 (9.1%)           | -                           |
| Tachyarrhythmia                            | -               | 1 (4.5%)           | -                           |
| Congenital, familial and genetic disorders | 1 (7.7%)        | 1 (4.5%)           | -                           |
| Antithrombin III deficiency                | -               | 1 (4.5%)           | -                           |
| Fructose-1,6-bisphosphatase deficiency     | 1 (7.7%)        | -                  | -                           |
| Ear and labyrinth disorders                | -               | -                  | 1 (5.9%)                    |
| Vertigo                                    | -               | -                  | 1 (5.9%)                    |
| Endocrine disorders                        | 2 (15.4%)       | 1 (4.5%)           | -                           |
| Basedow's disease                          | 1 (7.7%)        | -                  | -                           |
| Hypothyroidism                             | 1 (7.7%)        | 1 (4.5%)           | -                           |
| Gastrointestinal disorders                 | 13 (100.0%)     | 22 (100.0%)        | 17 (100.0%)                 |
| Anal fissure                               | 1 (7.7%)        | 1 (4.5%)           | -                           |
| Anal fistula                               | -               | 1 (4.5%)           | 1 (5.9%)                    |
| Chronic gastritis                          | -               | -                  | 1 (5.9%)                    |
| Crohn's disease                            | 13 (100.0%)     | 22 (100.0%)        | 17 (100.0%)                 |
| Diarrhoea                                  | -               | 1 (4.5%)           | -                           |
| Diverticulum intestinal                    | -               | 1 (4.5%)           | -                           |
| Duodenal perforation                       | -               | 1 (4.5%)           | -                           |

Abbreviations: N, number of randomized subjects; n, number of subjects within each category; SOC, System Organ Class; PT, Preferred Term.

Program Name: MUCUS-Shell10a-V01

Output Location: .\Output\Shared\MUCUS-TFLS-Final-27MAR24-V01.pdf

Table 14.1.4: Summary of Medical History by SOC and PT

|                                                      | Naive<br>(N=13) | Biologic<br>(N=22) | Multiple Biologic<br>(N=17) |
|------------------------------------------------------|-----------------|--------------------|-----------------------------|
| Duodenal ulcer                                       | -               | -                  | 1 (5.9%)                    |
| Dyspepsia                                            | -               | -                  | 1 (5.9%)                    |
| Enterocutaneous fistula                              | -               | 1 (4.5%)           | -                           |
| Flatulence                                           | 1 (7.7%)        | -                  | -                           |
| Gastric ulcer                                        | -               | 1 (4.5%)           | -                           |
| Gastritis                                            | -               | 2 (9.1%)           | -                           |
| Gastritis erosive                                    | 1 (7.7%)        | -                  | -                           |
| Gastroesophageal reflux disease                      | 2 (15.4%)       | -                  | 1 (5.9%)                    |
| Haemorrhoids                                         | -               | 1 (4.5%)           | -                           |
| Hyperchlorhydria                                     | -               | -                  | 1 (5.9%)                    |
| Ileal stenosis                                       | 1 (7.7%)        | -                  | -                           |
| Inguinal hernia                                      | -               | 1 (4.5%)           | -                           |
| Intestinal dilatation                                | -               | 1 (4.5%)           | -                           |
| Intestinal stenosis                                  | -               | 1 (4.5%)           | -                           |
| Large intestine perforation                          | -               | 1 (4.5%)           | -                           |
| Pancreatitis                                         | -               | -                  | 2 (11.8%)                   |
| Rectal stenosis                                      | -               | -                  | 1 (5.9%)                    |
| Short-bowel syndrome                                 | -               | 1 (4.5%)           | -                           |
| Terminal ileitis                                     | -               | 1 (4.5%)           | -                           |
| Umbilical hernia                                     | -               | 1 (4.5%)           | -                           |
| General disorders and administration site conditions | -               | 2 (9.1%)           | 1 (5.9%)                    |
| Hernia                                               | -               | 1 (4.5%)           | -                           |
| Pain                                                 | -               | -                  | 1 (5.9%)                    |
| Stenosis                                             | -               | 1 (4.5%)           | -                           |
| Hepatobiliary disorders                              | 1 (7.7%)        | 2 (9.1%)           | 1 (5.9%)                    |
| Cholelithiasis                                       | 1 (7.7%)        | 1 (4.5%)           | 1 (5.9%)                    |
| Cholestasis                                          | -               | 1 (4.5%)           | -                           |
| Hepatic steatosis                                    | 1 (7.7%)        | -                  | -                           |
| Immune system disorders                              | -               | 3 (13.6%)          | 3 (17.6%)                   |
| Allergy to animal                                    | -               | -                  | 1 (5.9%)                    |

Abbreviations: N, number of randomized subjects; n, number of subjects within each category; SOC, System Organ Class; PT, Preferred Term.

Table 14.1.4: Summary of Medical History by SOC and PT

|                                                | Naive<br>(N=13) | Biologic<br>(N=22) | Multiple Biologic<br>(N=17) |
|------------------------------------------------|-----------------|--------------------|-----------------------------|
| Allergy to metals                              | -               | 1 (4.5%)           | 1 (5.9%)                    |
| Drug hypersensitivity                          | -               | -                  | 1 (5.9%)                    |
| Food allergy                                   | -               | 1 (4.5%)           | -                           |
| Mite allergy                                   | -               | -                  | 1 (5.9%)                    |
| Seasonal allergy                               | -               | 2 (9.1%)           | 2 (11.8%)                   |
| Infections and infestations                    | 1 (7.7%)        | 3 (13.6%)          | 3 (17.6%)                   |
| Herpes zoster                                  | -               | 1 (4.5%)           | 1 (5.9%)                    |
| Latent tuberculosis                            | -               | 1 (4.5%)           | -                           |
| Oesophageal candidiasis                        | -               | 1 (4.5%)           | 1 (5.9%)                    |
| Pilonidal disease                              | -               | -                  | 1 (5.9%)                    |
| Staphylococcal infection                       | -               | 1 (4.5%)           | -                           |
| Urinary tract infection                        | 1 (7.7%)        | -                  | -                           |
| Injury, poisoning and procedural complications | 1 (7.7%)        | 1 (4.5%)           | 2 (11.8%)                   |
| Anastomotic stenosis                           | -               | 1 (4.5%)           | -                           |
| Clavicle fracture                              | -               | -                  | 1 (5.9%)                    |
| Incisional hernia                              | 1 (7.7%)        | -                  | -                           |
| Joint dislocation                              | -               | -                  | 1 (5.9%)                    |
| Investigations                                 | -               | 1 (4.5%)           | 1 (5.9%)                    |
| Aldolase abnormal                              | -               | -                  | 1 (5.9%)                    |
| Interferon gamma release assay positive        | -               | 1 (4.5%)           | -                           |
| Metabolism and nutrition disorders             | 7 (53.8%)       | 3 (13.6%)          | 6 (35.3%)                   |
| Cachexia                                       | -               | -                  | 1 (5.9%)                    |
| Folate deficiency                              | -               | -                  | 1 (5.9%)                    |
| Fructose intolerance                           | 1 (7.7%)        | -                  | -                           |
| Histamine intolerance                          | -               | -                  | 1 (5.9%)                    |
| Hypercholesterolaemia                          | 1 (7.7%)        | 1 (4.5%)           | -                           |
| Hyperlipidaemia                                | -               | 1 (4.5%)           | 1 (5.9%)                    |
| Iron deficiency                                | 1 (7.7%)        | -                  | 2 (11.8%)                   |
| Lactose intolerance                            | 3 (23.1%)       | -                  | 1 (5.9%)                    |
| Obesity                                        | 1 (7.7%)        | -                  | -                           |

Abbreviations: N, number of randomized subjects; n, number of subjects within each category; SOC, System Organ Class; PT, Preferred Term.

Program Name: MUCUS-Shell10a-V01

Output Location: .\Output\Shared\MUCUS-TFLS-Final-27MAR24-V01.pdf

Table 14.1.4: Summary of Medical History by SOC and PT

|                                                                     | Naive<br>(N=13) | Biologic<br>(N=22) | Multiple Biologic<br>(N=17) |
|---------------------------------------------------------------------|-----------------|--------------------|-----------------------------|
| Protein deficiency                                                  | -               | -                  | 1 (5.9%)                    |
| Type 2 diabetes mellitus                                            | -               | -                  | 1 (5.9%)                    |
| Vitamin B12 deficiency                                              | 3 (23.1%)       | 1 (4.5%)           | 1 (5.9%)                    |
| Vitamin D deficiency                                                | 2 (15.4%)       | -                  | 3 (17.6%)                   |
| Zinc deficiency                                                     | 1 (7.7%)        | -                  | -                           |
| Musculoskeletal and connective tissue disorders                     | 1 (7.7%)        | 4 (18.2%)          | 1 (5.9%)                    |
| Arthralgia                                                          | -               | 1 (4.5%)           | -                           |
| Axial spondyloarthritis                                             | 1 (7.7%)        | -                  | -                           |
| Intervertebral disc protrusion                                      | -               | 1 (4.5%)           | -                           |
| Osteopenia                                                          | -               | 1 (4.5%)           | -                           |
| Sacroiliitis                                                        | -               | 1 (4.5%)           | -                           |
| Spinal pain                                                         | -               | -                  | 1 (5.9%)                    |
| Spondylolisthesis                                                   | 1 (7.7%)        | -                  | -                           |
| Neoplasms benign, malignant and unspecified (incl cysts and polyps) | 1 (7.7%)        | 3 (13.6%)          | 1 (5.9%)                    |
| Basal cell carcinoma                                                | 1 (7.7%)        | -                  | -                           |
| Colon cancer                                                        | -               | -                  | 1 (5.9%)                    |
| Fibroma                                                             | -               | 1 (4.5%)           | -                           |
| Infected neoplasm                                                   | -               | 1 (4.5%)           | -                           |
| Neoplasm                                                            | -               | 1 (4.5%)           | -                           |
| Nervous system disorders                                            | 2 (15.4%)       | 1 (4.5%)           | -                           |
| Complex regional pain syndrome                                      | -               | 1 (4.5%)           | -                           |
| Headache                                                            | 2 (15.4%)       | -                  | -                           |
| Migraine                                                            | -               | 1 (4.5%)           | -                           |
| Psychiatric disorders                                               | 2 (15.4%)       | 1 (4.5%)           | 2 (11.8%)                   |
| Depression                                                          | 2 (15.4%)       | 1 (4.5%)           | 2 (11.8%)                   |
| Post-traumatic stress disorder                                      | -               | 1 (4.5%)           | -                           |
| Renal and urinary disorders                                         | 1 (7.7%)        | 1 (4.5%)           | 2 (11.8%)                   |
| Acute kidney injury                                                 | 1 (7.7%)        | -                  | -                           |
| Nephrolithiasis                                                     | -               | 1 (4.5%)           | 1 (5.9%)                    |
| Renal colic                                                         | -               | -                  | 1 (5.9%)                    |

Abbreviations: N, number of randomized subjects; n, number of subjects within each category; SOC, System Organ Class; PT, Preferred Term.

Program Name: MUCUS-Shell10a-V01

Output Location: .\Output\Shared\MUCUS-TFLS-Final-27MAR24-V01.pdf

Table 14.1.4: Summary of Medical History by SOC and PT

|                                                 | Naive<br>(N=13) | Biologic<br>(N=22) | Multiple Biologic<br>(N=17) |
|-------------------------------------------------|-----------------|--------------------|-----------------------------|
| Renal cyst                                      | -               | -                  | 1 (5.9%)                    |
| Reproductive system and breast disorders        | 2 (15.4%)       | -                  | 1 (5.9%)                    |
| Balanoposthitis                                 | -               | -                  | 1 (5.9%)                    |
| Female genital tract fistula                    | 1 (7.7%)        | -                  | -                           |
| Rectocele                                       | 1 (7.7%)        | -                  | -                           |
| Respiratory, thoracic and mediastinal disorders | 2 (15.4%)       | 1 (4.5%)           | 2 (11.8%)                   |
| Asthma                                          | 1 (7.7%)        | -                  | 1 (5.9%)                    |
| Chronic obstructive pulmonary disease           | -               | -                  | 1 (5.9%)                    |
| Nasal polyps                                    | -               | -                  | 1 (5.9%)                    |
| Pulmonary embolism                              | -               | 1 (4.5%)           | -                           |
| Rhinitis allergic                               | 1 (7.7%)        | -                  | -                           |
| Skin and subcutaneous tissue disorders          | 2 (15.4%)       | 5 (22.7%)          | 3 (17.6%)                   |
| Alopecia                                        | -               | 1 (4.5%)           | -                           |
| Hidradenitis                                    | -               | -                  | 1 (5.9%)                    |
| Neurodermatitis                                 | -               | -                  | 1 (5.9%)                    |
| Psoriasis                                       | 1 (7.7%)        | 4 (18.2%)          | 1 (5.9%)                    |
| Pyoderma gangrenosum                            | 1 (7.7%)        | -                  | 1 (5.9%)                    |
| Solar urticaria                                 | -               | 1 (4.5%)           | -                           |
| Surgical and medical procedures                 | 3 (23.1%)       | 12 (54.5%)         | 8 (47.1%)                   |
| Abscess drainage                                | -               | -                  | 1 (5.9%)                    |
| Anal fissure excision                           | 1 (7.7%)        | 1 (4.5%)           | -                           |
| Anal skin tag excision                          | -               | 1 (4.5%)           | -                           |
| Appendectomy                                    | -               | 4 (18.2%)          | 2 (11.8%)                   |
| Caesarean section                               | -               | -                  | 1 (5.9%)                    |
| Catheter management                             | -               | -                  | 1 (5.9%)                    |
| Cervical conisation                             | -               | 1 (4.5%)           | -                           |
| Cholecystectomy                                 | 1 (7.7%)        | 1 (4.5%)           | 1 (5.9%)                    |
| Colectomy                                       | -               | 2 (9.1%)           | 1 (5.9%)                    |
| Colon operation                                 | -               | -                  | 1 (5.9%)                    |
| Colorectostomy                                  | -               | 1 (4.5%)           | -                           |

Abbreviations: N, number of randomized subjects; n, number of subjects within each category; SOC, System Organ Class; PT, Preferred Term.

Program Name: MUCUS-Shell110a-V01

Output Location: .\Output\Shared\MUCUS-TFLS-Final-27MAR24-V01.pdf

Table 14.1.4: Summary of Medical History by SOC and PT

|                                   | Naive<br>(N=13) | Biologic<br>(N=22) | Multiple Biologic<br>(N=17) |
|-----------------------------------|-----------------|--------------------|-----------------------------|
| Coronary arterial stent insertion | -               | -                  | 1 (5.9%)                    |
| Fistula repair                    | -               | 1 (4.5%)           | -                           |
| Gastroenterostomy                 | -               | 1 (4.5%)           | -                           |
| Haemorrhoid operation             | 1 (7.7%)        | 1 (4.5%)           | 1 (5.9%)                    |
| Hysterectomy                      | 1 (7.7%)        | -                  | 1 (5.9%)                    |
| Ileocaecal resection              | 1 (7.7%)        | 5 (22.7%)          | 2 (11.8%)                   |
| Ileostomy                         | -               | -                  | 1 (5.9%)                    |
| Ovarian cystectomy                | -               | 1 (4.5%)           | -                           |
| Parenteral nutrition              | -               | 1 (4.5%)           | -                           |
| Sinus operation                   | -               | -                  | 1 (5.9%)                    |
| Thyroidectomy                     | -               | -                  | 1 (5.9%)                    |
| Toe amputation                    | -               | -                  | 1 (5.9%)                    |
| Tonsillectomy                     | -               | 1 (4.5%)           | -                           |
| Tympanoplasty                     | -               | 1 (4.5%)           | -                           |
| Umbilical hernia repair           | -               | 1 (4.5%)           | -                           |
| Vaginal fistula repair            | 1 (7.7%)        | -                  | -                           |
| Vascular disorders                | 3 (23.1%)       | 5 (22.7%)          | 3 (17.6%)                   |
| Behcet's syndrome                 | -               | 1 (4.5%)           | -                           |
| Deep vein thrombosis              | -               | 1 (4.5%)           | 1 (5.9%)                    |
| Hypertension                      | 3 (23.1%)       | 2 (9.1%)           | 1 (5.9%)                    |
| Hypotension                       | -               | 1 (4.5%)           | -                           |
| Thrombosis                        | -               | -                  | 1 (5.9%)                    |

Abbreviations: N, number of randomized subjects; n, number of subjects within each category; SOC, System Organ Class; PT, Preferred Term.

Program Name: MUCUS-Shell110a-V01

Output Location: .\Output\Shared\MUCUS-TFLS-Final-27MAR24-V01.pdf



Table 14.1.5: Summary of Prior Medications

|                                                                                              | Naive<br>(N=13) | Biologic<br>(N=22) | Multiple Biologic<br>(N=17) |
|----------------------------------------------------------------------------------------------|-----------------|--------------------|-----------------------------|
| Subjects with >= 1 Prior Medications                                                         | 9 (69.2%)       | 22 (100.0%)        | 17 (100.0%)                 |
| Anesthetics                                                                                  | -               | 3 (13.6%)          | 3 (17.6%)                   |
| Propofol                                                                                     | -               | 3 (13.6%)          | 3 (17.6%)                   |
| Antianemic Preparations                                                                      | -               | 2 (9.1%)           | 1 (5.9%)                    |
| Ferric Carboxymaltose                                                                        | -               | 1 (4.5%)           | -                           |
| Ferric Maltol                                                                                | -               | 1 (4.5%)           | 1 (5.9%)                    |
| Antidiarrheals, Intestinal Antiinflammatory/Anti-infective Agents                            | 8 (61.5%)       | 11 (50.0%)         | 13 (76.5%)                  |
| Bifidobacterium Longum; fibre, Dietary; lactobacillus Rhamnosus                              | -               | 1 (4.5%)           | -                           |
| Budesonide                                                                                   | 4 (30.8%)       | 6 (27.3%)          | 7 (41.2%)                   |
| Hydrocortisone Acetate                                                                       | -               | -                  | 2 (11.8%)                   |
| Mesalazine                                                                                   | 1 (7.7%)        | 4 (18.2%)          | 8 (47.1%)                   |
| Prednisolone                                                                                 | 6 (46.2%)       | 8 (36.4%)          | 7 (41.2%)                   |
| Sulfasalazine                                                                                | -               | -                  | 2 (11.8%)                   |
| Antineoplastic Agents                                                                        | -               | -                  | 1 (5.9%)                    |
| Mercaptopurine                                                                               | -               | -                  | 1 (5.9%)                    |
| Beta Blocking Agents                                                                         | -               | 1 (4.5%)           | -                           |
| Bisoprolol                                                                                   | -               | 1 (4.5%)           | -                           |
| Bile And Liver Therapy                                                                       | -               | 1 (4.5%)           | -                           |
| Ursodeoxycholic Acid                                                                         | -               | 1 (4.5%)           | -                           |
| Corticosteroids For Systemic Use                                                             | -               | 1 (4.5%)           | -                           |
| Steroids                                                                                     | -               | 1 (4.5%)           | -                           |
| Drugs For Constipation                                                                       | -               | 3 (13.6%)          | -                           |
| Citric Acid;magnesium Oxide;sodium Picosulfate                                               | -               | 2 (9.1%)           | -                           |
| Macrogol 3350;potassium Chloride;sodium Bicarbonate;sodium Chloride;sodium Sulfate Anhydrous | -               | 1 (4.5%)           | -                           |
| Drugs For Functional Gastrointestinal Disorders                                              | -               | 1 (4.5%)           | -                           |
| Mebeverine                                                                                   | -               | 1 (4.5%)           | -                           |
| Immunosuppressants                                                                           | 4 (30.8%)       | 22 (100.0%)        | 17 (100.0%)                 |
| Adalimumab                                                                                   | -               | 11 (50.0%)         | 14 (82.4%)                  |
| Azathioprine                                                                                 | 4 (30.8%)       | 10 (45.5%)         | 10 (58.8%)                  |
| Golimumab                                                                                    | -               | -                  | 1 (5.9%)                    |

Abbreviations: N, number of randomized subjects; n, number of subjects within each category.

Table 14.1.5: Summary of Prior Medications

|                                                | Naive<br>(N=13) | Biologic<br>(N=22) | Multiple Biologic<br>(N=17) |
|------------------------------------------------|-----------------|--------------------|-----------------------------|
| Infliximab                                     | -               | 11 (50.0%)         | 14 (82.4%)                  |
| Methotrexate                                   | -               | 1 (4.5%)           | 1 (5.9%)                    |
| Vedolizumab                                    | -               | 1 (4.5%)           | 8 (47.1%)                   |
| Investigational Drug                           | -               | -                  | 1 (5.9%)                    |
| Mongersen                                      | -               | -                  | 1 (5.9%)                    |
| Other Alimentary Tract And Metabolism Products | 1 (7.7%)        | -                  | -                           |
| Escherichia Coli                               | 1 (7.7%)        | -                  | -                           |
| Psycholeptics                                  | -               | 2 (9.1%)           | 1 (5.9%)                    |
| Midazolam                                      | -               | 2 (9.1%)           | 1 (5.9%)                    |
| Vasoprotectives                                | -               | 1 (4.5%)           | 1 (5.9%)                    |
| Betamethasone Sodium Phosphate                 | -               | -                  | 1 (5.9%)                    |
| Corticosteroids                                | -               | 1 (4.5%)           | -                           |
| Vitamins                                       | -               | 1 (4.5%)           | -                           |
| Colecalciferol                                 | -               | 1 (4.5%)           | -                           |

Abbreviations: N, number of randomized subjects; n, number of subjects within each category.

Program Name: MUCUS-Shell14-V01  
 Output Location: .\Output\Shared\MUCUS-TFLS-Final-27MAR24-V01.pdf

Table 14.1.6: Summary of Concomitant Medications

|                                               | Naive<br>(N=13) | Biologic<br>(N=22) | Multiple Biologic<br>(N=17) |
|-----------------------------------------------|-----------------|--------------------|-----------------------------|
| Subjects with >= 1 Concomitant Medications    | 12 (92.3%)      | 21 (95.5%)         | 17 (100.0%)                 |
| Agents Acting On The Renin-Angiotensin System | 3 (23.1%)       | 2 (9.1%)           | 2 (11.8%)                   |
| Candesartan                                   | 2 (15.4%)       | 1 (4.5%)           | -                           |
| Indapamide;perindopril Arginine               | -               | -                  | 1 (5.9%)                    |
| Olmesartan                                    | -               | 1 (4.5%)           | -                           |
| Ramipril                                      | 1 (7.7%)        | -                  | 2 (11.8%)                   |
| Telmisartan                                   | -               | -                  | 1 (5.9%)                    |
| All Other Therapeutic Products                | -               | -                  | 2 (11.8%)                   |
| Ascorbic Acid                                 | -               | -                  | 1 (5.9%)                    |
| Sodium Polystyrene Sulfonate                  | -               | -                  | 1 (5.9%)                    |
| Analgesics                                    | 7 (53.8%)       | 11 (50.0%)         | 5 (29.4%)                   |
| Caffeine;paracetamol;propyphenazone           | 1 (7.7%)        | 1 (4.5%)           | 3 (17.6%)                   |
| Dihydrocodeine                                | -               | 1 (4.5%)           | 1 (5.9%)                    |
| Metamizole                                    | 2 (15.4%)       | 2 (9.1%)           | -                           |
| Metamizole Sodium                             | 3 (23.1%)       | 6 (27.3%)          | 1 (5.9%)                    |
| Naloxone Hydrochloride;tilidine Hydrochloride | -               | 1 (4.5%)           | -                           |
| Paracetamol                                   | 2 (15.4%)       | 1 (4.5%)           | -                           |
| Pregabalin                                    | -               | 1 (4.5%)           | -                           |
| Sumatriptan                                   | -               | 1 (4.5%)           | -                           |
| Tramadol                                      | -               | 1 (4.5%)           | -                           |
| Tramadol Hydrochloride                        | -               | 1 (4.5%)           | -                           |
| Anesthetics                                   | 1 (7.7%)        | 3 (13.6%)          | 2 (11.8%)                   |
| Propofol                                      | 1 (7.7%)        | 3 (13.6%)          | 2 (11.8%)                   |
| Anti-Parkinson Drugs                          | -               | 1 (4.5%)           | -                           |
| Levodopa                                      | -               | 1 (4.5%)           | -                           |
| Antianemic Preparations                       | 8 (61.5%)       | 5 (22.7%)          | 8 (47.1%)                   |
| Cyanocobalamin                                | 3 (23.1%)       | 1 (4.5%)           | 3 (17.6%)                   |
| Ferric Carboxymaltose                         | 5 (38.5%)       | 2 (9.1%)           | 3 (17.6%)                   |
| Ferric Maltol                                 | 1 (7.7%)        | 2 (9.1%)           | 1 (5.9%)                    |
| Ferrous Glycine Sulfate                       | 1 (7.7%)        | -                  | 1 (5.9%)                    |

Abbreviations: N, number of randomized subjects; n, number of subjects within each category.

Program Name: MUCUS-Shell14-V01

Output Location: .\Output\Shared\MUCUS-TFLS-Final-27MAR24-V01.pdf

Table 14.1.6: Summary of Concomitant Medications

|                                                                                                                                                | Naive<br>(N=13) | Biologic<br>(N=22) | Multiple Biologic<br>(N=17) |
|------------------------------------------------------------------------------------------------------------------------------------------------|-----------------|--------------------|-----------------------------|
| Folic Acid                                                                                                                                     | 4 (30.8%)       | 3 (13.6%)          | 4 (23.5%)                   |
| Iron Isomaltoside 1000                                                                                                                         | -               | -                  | 1 (5.9%)                    |
| Saccharated Iron Oxide                                                                                                                         | 1 (7.7%)        | -                  | -                           |
| Vitamin B12 Nos                                                                                                                                | 2 (15.4%)       | 1 (4.5%)           | 1 (5.9%)                    |
| Antibacterials For Systemic Use                                                                                                                | 1 (7.7%)        | 1 (4.5%)           | 4 (23.5%)                   |
| Antibiotics                                                                                                                                    | 1 (7.7%)        | -                  | -                           |
| Cefuroxime                                                                                                                                     | -               | -                  | 1 (5.9%)                    |
| Ciprofloxacin                                                                                                                                  | -               | 1 (4.5%)           | 1 (5.9%)                    |
| Metronidazole                                                                                                                                  | -               | -                  | 1 (5.9%)                    |
| Sulfamethoxazole;trimethoprim                                                                                                                  | -               | -                  | 1 (5.9%)                    |
| Antibiotics And Chemotherapeutics For Dermatological Use                                                                                       | 1 (7.7%)        | 1 (4.5%)           | -                           |
| Aciclovir                                                                                                                                      | 1 (7.7%)        | 1 (4.5%)           | -                           |
| Antidiarrheals, Intestinal Antiinflammatory/Anti-infective Agents                                                                              | 10 (76.9%)      | 12 (54.5%)         | 11 (64.7%)                  |
| Betamethasone Valerate                                                                                                                         | -               | 1 (4.5%)           | -                           |
| Bifidobacterium Animalis;enterococcus Faecium;lactobacillus Acidophilus<br>;lactobacillus Lactis;lactobacillus Salivarius;streptococcus Lactis | -               | -                  | 1 (5.9%)                    |
| Budesonide                                                                                                                                     | 4 (30.8%)       | 2 (9.1%)           | 3 (17.6%)                   |
| Colestyramine                                                                                                                                  | 1 (7.7%)        | 2 (9.1%)           | 1 (5.9%)                    |
| Loperamide                                                                                                                                     | 1 (7.7%)        | -                  | -                           |
| Loperamide Hydrochloride                                                                                                                       | -               | 2 (9.1%)           | 1 (5.9%)                    |
| Malus Spp.                                                                                                                                     | -               | 1 (4.5%)           | -                           |
| Mesalazine                                                                                                                                     | 3 (23.1%)       | 1 (4.5%)           | 4 (23.5%)                   |
| Papaver Somniferum Tincture                                                                                                                    | -               | 1 (4.5%)           | -                           |
| Prednisolone                                                                                                                                   | 4 (30.8%)       | 7 (31.8%)          | 6 (35.3%)                   |
| Vancomycin                                                                                                                                     | -               | -                  | 1 (5.9%)                    |
| Antifungals For Dermatological Use                                                                                                             | 1 (7.7%)        | -                  | -                           |
| Amorolfine                                                                                                                                     | 1 (7.7%)        | -                  | -                           |
| Antihistamines For Systemic Use                                                                                                                | 1 (7.7%)        | 4 (18.2%)          | -                           |
| Antihistamines                                                                                                                                 | -               | 1 (4.5%)           | -                           |
| Cetirizine Hydrochloride                                                                                                                       | -               | 2 (9.1%)           | -                           |
| Desloratadine                                                                                                                                  | 1 (7.7%)        | -                  | -                           |

Abbreviations: N, number of randomized subjects; n, number of subjects within each category.

Table 14.1.6: Summary of Concomitant Medications

|                                                                                                                                                                                                                                                                                                                                                                                                                                             | Naive<br>(N=13) | Biologic<br>(N=22) | Multiple Biologic<br>(N=17) |
|---------------------------------------------------------------------------------------------------------------------------------------------------------------------------------------------------------------------------------------------------------------------------------------------------------------------------------------------------------------------------------------------------------------------------------------------|-----------------|--------------------|-----------------------------|
| Dimetindene Maleate                                                                                                                                                                                                                                                                                                                                                                                                                         | -               | 1 (4.5%)           | -                           |
| Ebastine                                                                                                                                                                                                                                                                                                                                                                                                                                    | -               | 1 (4.5%)           | -                           |
| Fexofenadine Hydrochloride                                                                                                                                                                                                                                                                                                                                                                                                                  | -               | 1 (4.5%)           | -                           |
| Antiinflammatory And Antirheumatic Products                                                                                                                                                                                                                                                                                                                                                                                                 | 1 (7.7%)        | -                  | 1 (5.9%)                    |
| Celecoxib                                                                                                                                                                                                                                                                                                                                                                                                                                   | 1 (7.7%)        | -                  | -                           |
| Curcuma Longa                                                                                                                                                                                                                                                                                                                                                                                                                               | -               | -                  | 1 (5.9%)                    |
| Ibuprofen                                                                                                                                                                                                                                                                                                                                                                                                                                   | 1 (7.7%)        | -                  | -                           |
| Antimycobacterials                                                                                                                                                                                                                                                                                                                                                                                                                          | -               | 2 (9.1%)           | -                           |
| Isoniazid                                                                                                                                                                                                                                                                                                                                                                                                                                   | -               | 2 (9.1%)           | -                           |
| Antithrombotic Agents                                                                                                                                                                                                                                                                                                                                                                                                                       | 1 (7.7%)        | 3 (13.6%)          | 2 (11.8%)                   |
| Acetylsalicylic Acid                                                                                                                                                                                                                                                                                                                                                                                                                        | -               | 1 (4.5%)           | 1 (5.9%)                    |
| Apixaban                                                                                                                                                                                                                                                                                                                                                                                                                                    | -               | 1 (4.5%)           | -                           |
| Certoparin Sodium                                                                                                                                                                                                                                                                                                                                                                                                                           | -               | 1 (4.5%)           | -                           |
| Dalteparin Sodium                                                                                                                                                                                                                                                                                                                                                                                                                           | 1 (7.7%)        | -                  | -                           |
| Rivaroxaban                                                                                                                                                                                                                                                                                                                                                                                                                                 | -               | 1 (4.5%)           | 1 (5.9%)                    |
| Ticagrelor                                                                                                                                                                                                                                                                                                                                                                                                                                  | -               | -                  | 1 (5.9%)                    |
| Tinzaparin Sodium                                                                                                                                                                                                                                                                                                                                                                                                                           | -               | 1 (4.5%)           | -                           |
| Beta Blocking Agents                                                                                                                                                                                                                                                                                                                                                                                                                        | 1 (7.7%)        | 4 (18.2%)          | 1 (5.9%)                    |
| Bisoprolol                                                                                                                                                                                                                                                                                                                                                                                                                                  | -               | 3 (13.6%)          | -                           |
| Bisoprolol Fumarate                                                                                                                                                                                                                                                                                                                                                                                                                         | 1 (7.7%)        | -                  | -                           |
| Metoprolol                                                                                                                                                                                                                                                                                                                                                                                                                                  | -               | -                  | 1 (5.9%)                    |
| Metoprolol Succinate                                                                                                                                                                                                                                                                                                                                                                                                                        | -               | 1 (4.5%)           | -                           |
| Bile And Liver Therapy                                                                                                                                                                                                                                                                                                                                                                                                                      | -               | 1 (4.5%)           | -                           |
| Ursodeoxycholic Acid                                                                                                                                                                                                                                                                                                                                                                                                                        | -               | 1 (4.5%)           | -                           |
| Blood Substitutes And Perfusion Solutions                                                                                                                                                                                                                                                                                                                                                                                                   | -               | 1 (4.5%)           | 1 (5.9%)                    |
| Alanine;arginine;aspartic Acid;calcium Chloride;glucose Monohydrate;glutamic Acid;glycine;glycine Max Oil;histidine Hydrochloride;isoleucine;leucine;lysine Hydrochloride;magnesium Acetate Tetrahydrate;medium-Chain Triglycerides;methionine;phenylalanine;potassium Acetate;proline;serine;sodium Acetate;sodium Chloride;sodium Hydroxide;sodium Phosphate Monobasic (Dihydrate);threonine;tryptophan, L-;valine;zinc Acetate Dihydrate | -               | 1 (4.5%)           | -                           |
| Calcium Chloride Dihydrate;potassium Chloride;sodium Lactate                                                                                                                                                                                                                                                                                                                                                                                | -               | -                  | 1 (5.9%)                    |
| Cardiac Therapy                                                                                                                                                                                                                                                                                                                                                                                                                             | -               | 1 (4.5%)           | -                           |
| Glyceryl Trinitrate                                                                                                                                                                                                                                                                                                                                                                                                                         | -               | 1 (4.5%)           | -                           |
| Corticosteroids For Systemic Use                                                                                                                                                                                                                                                                                                                                                                                                            | 1 (7.7%)        | -                  | 1 (5.9%)                    |

Abbreviations: N, number of randomized subjects; n, number of subjects within each category.

Program Name: MUCUS-Shell4-V01

Output Location: .\Output\Shared\MUCUS-TFLS-Final-27MAR24-V01.pdf

Table 14.1.6: Summary of Concomitant Medications

|                                                                                              | Naive<br>(N=13) | Biologic<br>(N=22) | Multiple Biologic<br>(N=17) |
|----------------------------------------------------------------------------------------------|-----------------|--------------------|-----------------------------|
| Methylprednisolone                                                                           | -               | -                  | 1 (5.9%)                    |
| Prednisone                                                                                   | 1 (7.7%)        | -                  | -                           |
| Corticosteroids, Dermatological Preparations                                                 | -               | 1 (4.5%)           | -                           |
| Mometasone Furoate                                                                           | -               | 1 (4.5%)           | -                           |
| Diuretics                                                                                    | 1 (7.7%)        | -                  | 2 (11.8%)                   |
| Hydrochlorothiazide                                                                          | 1 (7.7%)        | -                  | -                           |
| Torsemide                                                                                    | -               | -                  | 2 (11.8%)                   |
| Drugs For Acid Related Disorders                                                             | 6 (46.2%)       | 6 (27.3%)          | 7 (41.2%)                   |
| Calcium Carbonate                                                                            | 1 (7.7%)        | -                  | -                           |
| Esomeprazole                                                                                 | 1 (7.7%)        | -                  | 1 (5.9%)                    |
| Pantoprazole                                                                                 | 5 (38.5%)       | 5 (22.7%)          | 5 (29.4%)                   |
| Pantoprazole Sodium Sesquihydrate                                                            | -               | 1 (4.5%)           | 1 (5.9%)                    |
| Drugs For Constipation                                                                       | 2 (15.4%)       | 3 (13.6%)          | 1 (5.9%)                    |
| Citric Acid;magnesium Oxide;sodium Picosulfate                                               | -               | 1 (4.5%)           | -                           |
| Macrogol                                                                                     | -               | 1 (4.5%)           | -                           |
| Macrogol 3350;potassium Chloride;sodium Bicarbonate;sodium Chloride;sodium Sulfate Anhydrous | 1 (7.7%)        | -                  | 1 (5.9%)                    |
| Plantago Ovata                                                                               | 1 (7.7%)        | -                  | -                           |
| Plantago Ovata Seed Husk                                                                     | -               | 1 (4.5%)           | -                           |
| Drugs For Functional Gastrointestinal Disorders                                              | 2 (15.4%)       | 2 (9.1%)           | 1 (5.9%)                    |
| Hyoscine Butylbromide                                                                        | -               | 2 (9.1%)           | -                           |
| Hyoscine Butylbromide;paracetamol                                                            | -               | -                  | 1 (5.9%)                    |
| Mebeverine Embonate                                                                          | 1 (7.7%)        | -                  | -                           |
| Simeticone                                                                                   | 1 (7.7%)        | -                  | -                           |
| Drugs For Obstructive Airway Diseases                                                        | -               | 1 (4.5%)           | 2 (11.8%)                   |
| Budesonide;formoterol Fumarate                                                               | -               | -                  | 1 (5.9%)                    |
| Fluticasone Furoate;umeclidinium Bromide;vilanterol Trifenatate                              | -               | -                  | 1 (5.9%)                    |
| Fluticasone Furoate;vilanterol Trifenatate                                                   | -               | -                  | 1 (5.9%)                    |
| Salbutamol                                                                                   | -               | -                  | 1 (5.9%)                    |
| Tiotropium Bromide Monohydrate                                                               | -               | 1 (4.5%)           | -                           |
| Drugs Used In Diabetes                                                                       | -               | -                  | 1 (5.9%)                    |

Abbreviations: N, number of randomized subjects; n, number of subjects within each category.

Program Name: MUCUS-Shell14-V01

Output Location: .\Output\Shared\MUCUS-TFLS-Final-27MAR24-V01.pdf

Table 14.1.6: Summary of Concomitant Medications

|                                                                         | Naive<br>(N=13) | Biologic<br>(N=22) | Multiple Biologic<br>(N=17) |
|-------------------------------------------------------------------------|-----------------|--------------------|-----------------------------|
| Insulin                                                                 | -               | -                  | 1 (5.9%)                    |
| General Nutrients                                                       | 1 (7.7%)        | 1 (4.5%)           | 1 (5.9%)                    |
| Carbohydrates Nos;fats Nos;minerals Nos;proteins Nos;vitamins Nos       | -               | 1 (4.5%)           | -                           |
| Carbohydrates Nos;fatty Acids Nos;minerals Nos;proteins Nos;vitamins No | -               | -                  | 1 (5.9%)                    |
| s                                                                       |                 |                    |                             |
| Nutrients Nos                                                           | 1 (7.7%)        | -                  | -                           |
| Immunosuppressants                                                      | 1 (7.7%)        | 5 (22.7%)          | 2 (11.8%)                   |
| Adalimumab                                                              | 1 (7.7%)        | 1 (4.5%)           | -                           |
| Azathioprine                                                            | -               | 2 (9.1%)           | 1 (5.9%)                    |
| Infliximab                                                              | -               | 1 (4.5%)           | -                           |
| Methotrexate                                                            | -               | -                  | 1 (5.9%)                    |
| Ustekinumab                                                             | -               | 2 (9.1%)           | -                           |
| Lipid Modifying Agents                                                  | 2 (15.4%)       | 3 (13.6%)          | 3 (17.6%)                   |
| Atorvastatin                                                            | -               | -                  | 1 (5.9%)                    |
| Colesevelam Hydrochloride                                               | -               | 1 (4.5%)           | 1 (5.9%)                    |
| Colestyramine                                                           | 1 (7.7%)        | 1 (4.5%)           | -                           |
| Ezetimibe                                                               | -               | -                  | 2 (11.8%)                   |
| Rosuvastatin                                                            | -               | 1 (4.5%)           | 1 (5.9%)                    |
| Simvastatin                                                             | 1 (7.7%)        | -                  | -                           |
| Mineral Supplements                                                     | 3 (23.1%)       | 3 (13.6%)          | 2 (11.8%)                   |
| Calcium Carbonate;colecalfiferol                                        | 1 (7.7%)        | 1 (4.5%)           | -                           |
| Calcium Carbonate;colecalfiferol;menaquinone                            | -               | -                  | 1 (5.9%)                    |
| Magnesium                                                               | -               | 1 (4.5%)           | 1 (5.9%)                    |
| Potassium Chloride                                                      | -               | 1 (4.5%)           | -                           |
| Zinc Orotate                                                            | 2 (15.4%)       | -                  | -                           |
| Zinc Oxide                                                              | -               | 1 (4.5%)           | -                           |
| Nasal Preparations                                                      | -               | -                  | 1 (5.9%)                    |
| Mometasone Furoate                                                      | -               | -                  | 1 (5.9%)                    |
| Other Alimentary Tract And Metabolism Products                          | 1 (7.7%)        | -                  | -                           |
| Zinc                                                                    | 1 (7.7%)        | -                  | -                           |
| Otologicals                                                             | 1 (7.7%)        | -                  | -                           |

Abbreviations: N, number of randomized subjects; n, number of subjects within each category.

Program Name: MUCUS-Shell14-V01

Output Location: .\Output\Shared\MUCUS-TFLS-Final-27MAR24-V01.pdf

Table 14.1.6: Summary of Concomitant Medications

|                                                                         | Naive<br>(N=13) | Biologic<br>(N=22) | Multiple Biologic<br>(N=17) |
|-------------------------------------------------------------------------|-----------------|--------------------|-----------------------------|
| Ofloxacin                                                               | 1 (7.7%)        | -                  | -                           |
| Psychoanaleptics                                                        | 2 (15.4%)       | -                  | -                           |
| Escitalopram                                                            | 1 (7.7%)        | -                  | -                           |
| Sertraline                                                              | 1 (7.7%)        | -                  | -                           |
| Trimipramine                                                            | 1 (7.7%)        | -                  | -                           |
| Psycholeptics                                                           | 1 (7.7%)        | 1 (4.5%)           | 1 (5.9%)                    |
| Midazolam                                                               | -               | 1 (4.5%)           | 1 (5.9%)                    |
| Pipamperone Hydrochloride                                               | 1 (7.7%)        | -                  | -                           |
| Temazepam                                                               | 1 (7.7%)        | -                  | -                           |
| Sex Hormones And Modulators Of The Genital System                       | 1 (7.7%)        | 2 (9.1%)           | -                           |
| Chlormadinone Acetate;ethinylestradiol                                  | -               | 1 (4.5%)           | -                           |
| Ethinylestradiol;levonorgestrel                                         | 1 (7.7%)        | 1 (4.5%)           | -                           |
| Stomatological Preparations                                             | -               | -                  | 2 (11.8%)                   |
| Hydrocortisone                                                          | -               | -                  | 1 (5.9%)                    |
| Zinc                                                                    | -               | -                  | 1 (5.9%)                    |
| Thyroid Therapy                                                         | 3 (23.1%)       | 1 (4.5%)           | 1 (5.9%)                    |
| Levothyroxine                                                           | 3 (23.1%)       | 1 (4.5%)           | -                           |
| Levothyroxine Sodium                                                    | -               | -                  | 1 (5.9%)                    |
| Vaccines                                                                | 2 (15.4%)       | 3 (13.6%)          | 1 (5.9%)                    |
| Covid-19 Vaccine Nrvv Ad (Chadox1 Ncov-19)                              | 1 (7.7%)        | -                  | -                           |
| Elasomeran                                                              | 1 (7.7%)        | -                  | -                           |
| Influenza Vaccine Inact Sag 4v                                          | 1 (7.7%)        | 1 (4.5%)           | -                           |
| Tozinameran                                                             | 1 (7.7%)        | 2 (9.1%)           | 1 (5.9%)                    |
| Vasoprotectives                                                         | -               | 1 (4.5%)           | -                           |
| Lidocaine                                                               | -               | 1 (4.5%)           | -                           |
| Lidocaine Hydrochloride                                                 | -               | 1 (4.5%)           | -                           |
| Vitamins                                                                | 7 (53.8%)       | 5 (22.7%)          | 8 (47.1%)                   |
| Colecalciferol                                                          | 6 (46.2%)       | 5 (22.7%)          | 8 (47.1%)                   |
| Nicotinamide;pyridoxine Hydrochloride;riboflavin;thiamine Hydrochloride | -               | -                  | 1 (5.9%)                    |
| Pyridoxine Hydrochloride                                                | -               | 1 (4.5%)           | -                           |

Abbreviations: N, number of randomized subjects; n, number of subjects within each category.

Program Name: MUCUS-Shell14-V01

Output Location: .\Output\Shared\MUCUS-TFLS-Final-27MAR24-V01.pdf



Table 14.1.6: Summary of Concomitant Medications

|               | Naive<br>(N=13) | Biologic<br>(N=22) | Multiple Biologic<br>(N=17) |
|---------------|-----------------|--------------------|-----------------------------|
| Vitamin D Nos | 1 (7.7%)        | -                  | -                           |

Abbreviations: N, number of randomized subjects; n, number of subjects within each category.

Program Name: MUCUS-Shell4-V01

Output Location: .\Output\Shared\MUCUS-TFLS-Final-27MAR24-V01.pdf

Table 14.1.7: Summary of Protocol Deviations

|                                        | Naive<br>(N=13) | Biologic<br>(N=22) | Multiple Biologic<br>(N=17) |
|----------------------------------------|-----------------|--------------------|-----------------------------|
| Major: n(%)                            | 5 (38.5%)       | 16 (72.7%)         | 9 (52.9%)                   |
| Inclusion/Exclusion Criteria - Subject | 4 (30.8%)       | 3 (13.6%)          | 7 (41.2%)                   |
| Informed Consent - Subject             | -               | 3 (13.6%)          | -                           |
| Investigational Product - Subject      | 1 (7.7%)        | 2 (9.1%)           | -                           |
| Laboratory - Subject                   | -               | 3 (13.6%)          | -                           |
| Procedures/Tests/Assessments - Site    | -               | 1 (4.5%)           | -                           |
| Procedures/Tests/Assessments - Subject | -               | 6 (27.3%)          | 3 (17.6%)                   |
| Randomization - Site                   | -               | 1 (4.5%)           | -                           |
| Visit Schedule - Subject               | -               | 3 (13.6%)          | -                           |
| Minor: n(%)                            | 10 (76.9%)      | 20 (90.9%)         | 12 (70.6%)                  |
| Inclusion/Exclusion Criteria - Subject | 2 (15.4%)       | 1 (4.5%)           | 1 (5.9%)                    |
| Informed Consent - Subject             | 1 (7.7%)        | -                  | 2 (11.8%)                   |
| Investigational Product - Site         | -               | 2 (9.1%)           | -                           |
| Laboratory - Subject                   | -               | 1 (4.5%)           | -                           |
| Procedures/Tests/Assessments - Site    | 1 (7.7%)        | 5 (22.7%)          | 1 (5.9%)                    |
| Procedures/Tests/Assessments - Subject | 5 (38.5%)       | 13 (59.1%)         | 6 (35.3%)                   |
| Visit Schedule - Subject               | 7 (53.8%)       | 13 (59.1%)         | 7 (41.2%)                   |

Abbreviations: N, number of randomized subjects; n, number of subjects within each category.

Program Name: MUCUS-Shell15-V01

Output Location: .\Output\Shared\MUCUS-TFLS-Final-27MAR24-V01.pdf

Table 14.2.1.1: Summary of Clinical Response and Endoscopic Response at Week 52: ITT Population

|                                                  | Naive<br>(N=13) | Biologic<br>(N=22) | Multiple Biologic<br>(N=17) |
|--------------------------------------------------|-----------------|--------------------|-----------------------------|
| Clinical Response + Endoscopic Response          |                 |                    |                             |
| Week 52                                          |                 |                    |                             |
| N                                                | 13              | 22                 | 17                          |
| [Responder] n(%)                                 | 3 (23.1%)       | 5 (22.7%)          | 5 (29.4%)                   |
| [Non-Responder] n(%)                             | 10 (76.9%)      | 17 (77.3%)         | 12 (70.6%)                  |
| [Responder] Odds Ratio Strata 1 vs Strata 2 or 3 |                 | 1.020              | 0.720                       |
| Odds Ratio 95% CI                                |                 | (0.200, 5.209)     | (0.137, 3.784)              |
| Odds Ratio P-value                               |                 | 0.981              | 0.698                       |
| [Responder] Odds Ratio Strata 2 vs Strata 3      |                 |                    | 0.706                       |
| Odds Ratio 95% CI                                |                 |                    | (0.167, 2.989)              |
| Odds Ratio P-value                               |                 |                    | 0.636                       |

Abbreviations: ITT, Intent-to-Treat Analysis set; N, number of randomized subjects; n, number of subjects within each category; Outcome definition, Reduction from baseline in SES-CD score  $\geq$  50% and Harvey Bradshaw Index decrease  $\geq$  3 points; Proc Logistic used to generate Odds Ratios and P-values.

Program Name: MUCUS-Shell6-V01-NC  
 Output Location: .\Output\Shared\MUCUS-TFLS-Final-27MAR24-V01.pdf

Table 14.2.1.2: Summary of Clinical Response and Endoscopic Response at Week 52: PP Population

|                                                  | Naive<br>(N=6) | Biologic<br>(N=11) | Multiple Biologic<br>(N=8) |
|--------------------------------------------------|----------------|--------------------|----------------------------|
| Clinical Response + Endoscopic Response          |                |                    |                            |
| Week 52                                          |                |                    |                            |
| N                                                | 6              | 11                 | 8                          |
| [Responder] n(%)                                 | 3 (50.0%)      | 5 (45.5%)          | 5 (62.5%)                  |
| [Non-Responder] n(%)                             | 3 (50.0%)      | 6 (54.5%)          | 3 (37.5%)                  |
| [Responder] Odds Ratio Strata 1 vs Strata 2 or 3 |                | 1.200              | 0.600                      |
| Odds Ratio 95% CI                                |                | (0.164, 8.799)     | (0.070, 5.136)             |
| Odds Ratio P-value                               |                | 0.858              | 0.641                      |
| [Responder] Odds Ratio Strata 2 vs Strata 3      |                |                    | 0.500                      |
| Odds Ratio 95% CI                                |                |                    | (0.078, 3.210)             |
| Odds Ratio P-value                               |                |                    | 0.465                      |

Abbreviations: N, number of randomized subjects; n, number of subjects within each category; Outcome definition, Reduction from baseline in SES-CD score  $\geq$  50% and Harvey Bradshaw Index decrease  $\geq$  3 points; Proc Logistic used to generate Odds Ratios and P-values.

Program Name: MUCUS-Shell16-V01-NC

Output Location: .\Output\Shared\MUCUS-TFLS-Final-27MAR24-V01.pdf

Table 14.2.1.3: Summary of Clinical Response and Endoscopic Response at Week 52 Gender Subgroup Analysis: ITT Population

|                                                  | Naive<br>(N=13) | Biologic<br>(N=22) | Multiple Biologic<br>(N=17) |
|--------------------------------------------------|-----------------|--------------------|-----------------------------|
| <b>Clinical Response + Endoscopic Response</b>   |                 |                    |                             |
| <b>Week 52</b>                                   |                 |                    |                             |
| <b>Women</b>                                     |                 |                    |                             |
| N                                                | 8               | 14                 | 6                           |
| [Responder] n(%)                                 | 2 (25.0%)       | 4 (28.6%)          | 1 (16.7%)                   |
| [Non-Responder] n(%)                             | 6 (75.0%)       | 10 (71.4%)         | 5 (83.3%)                   |
| [Responder] Odds Ratio Strata 1 vs Strata 2 or 3 |                 | 0.833              | 1.667                       |
| Odds Ratio 95% CI                                |                 | (0.115, 6.013)     | (0.115, 24.256)             |
| Odds Ratio P-value                               |                 | 0.857              | 0.708                       |
| <br>                                             |                 |                    |                             |
| [Responder] Odds Ratio Strata 2 vs Strata 3      |                 |                    | 2.000                       |
| Odds Ratio 95% CI                                |                 |                    | (0.174, 22.949)             |
| Odds Ratio P-value                               |                 |                    | 0.578                       |
| <br>                                             |                 |                    |                             |
| <b>Men</b>                                       |                 |                    |                             |
| N                                                | 5               | 8                  | 11                          |
| [Responder] n(%)                                 | 1 (20.0%)       | 1 (12.5%)          | 4 (36.4%)                   |
| [Non-Responder] n(%)                             | 4 (80.0%)       | 7 (87.5%)          | 7 (63.6%)                   |
| [Responder] Odds Ratio Strata 1 vs Strata 2 or 3 |                 | 1.750              | 0.437                       |
| Odds Ratio 95% CI                                |                 | (0.084, 36.284)    | (0.035, 5.395)              |
| Odds Ratio P-value                               |                 | 0.718              | 0.519                       |
| <br>                                             |                 |                    |                             |
| [Responder] Odds Ratio Strata 2 vs Strata 3      |                 |                    | 0.250                       |
| Odds Ratio 95% CI                                |                 |                    | (0.022, 2.837)              |
| Odds Ratio P-value                               |                 |                    | 0.263                       |
| <br>                                             |                 |                    |                             |
| Interaction P-value strata 1 vs Strata 3         |                 |                    | 0.519                       |
| Interaction P-value strata 2 vs Strata 3         |                 |                    | 0.263                       |

Abbreviations: ITT, Intent-to-Treat Analysis set; N, number of randomized subjects; n, number of subjects within each category; Outcome definition, Reduction from baseline in SES-CD score  $\geq$  50% and Harvey Bradshaw Index decrease  $\geq$  3 points; Proc Logistic used to generate Odds Ratios and P-values.

Program Name: MUCUS-Shell6-V01-NC  
 Output Location: .\Output\Shared\MUCUS-TFLS-Final-27MAR24-V01.pdf

Table 14.2.2: Summary of Clinical Response at Week 52: ITT Population

|                                                  | Naive<br>(N=13) | Biologic<br>(N=22) | Multiple Biologic<br>(N=17) |
|--------------------------------------------------|-----------------|--------------------|-----------------------------|
| Clinical Response                                |                 |                    |                             |
| Week 52                                          |                 |                    |                             |
| N                                                | 13              | 22                 | 17                          |
| [Responder] n(%)                                 | 8 (61.5%)       | 9 (40.9%)          | 8 (47.1%)                   |
| [Non-Responder] n(%)                             | 5 (38.5%)       | 13 (59.1%)         | 9 (52.9%)                   |
| [Responder] Odds Ratio Strata 1 vs Strata 2 or 3 |                 | 2.311              | 1.800                       |
| Odds Ratio 95% CI                                |                 | (0.568, 9.408)     | (0.415, 7.814)              |
| Odds Ratio P-value                               |                 | 0.242              | 0.433                       |
| [Responder] Odds Ratio Strata 2 vs Strata 3      |                 |                    | 0.779                       |
| Odds Ratio 95% CI                                |                 |                    | (0.217, 2.791)              |
| Odds Ratio P-value                               |                 |                    | 0.701                       |

Abbreviations: ITT, Intent-to-Treat Analysis set; N, number of randomized subjects; n, number of subjects within each category; Outcome definition, Reduction from baseline in Harvey Bradshaw Index >= 3 points; Proc Logistic used to generate Odds Ratios and P-values.

Program Name: MUCUS-Shell16-V01-NC  
 Output Location: .\Output\Shared\MUCUS-TFLS-Final-27MAR24-V01.pdf

Table 14.2.3.1: Summary of Endoscopic Response at Week 52: ITT Population

|                                                  | Naive<br>(N=13) | Biologic<br>(N=22) | Multiple Biologic<br>(N=17) |
|--------------------------------------------------|-----------------|--------------------|-----------------------------|
| Endoscopic Response                              |                 |                    |                             |
| Week 52                                          |                 |                    |                             |
| N                                                | 13              | 22                 | 17                          |
| [Responder] n(%)                                 | 3 (23.1%)       | 6 (27.3%)          | 6 (35.3%)                   |
| [Non-Responder] n(%)                             | 10 (76.9%)      | 16 (72.7%)         | 11 (64.7%)                  |
| [Responder] Odds Ratio Strata 1 vs Strata 2 or 3 |                 | 0.800              | 0.550                       |
| Odds Ratio 95% CI                                |                 | (0.162, 3.944)     | (0.108, 2.805)              |
| Odds Ratio P-value                               |                 | 0.784              | 0.472                       |
| [Responder] Odds Ratio Strata 2 vs Strata 3      |                 |                    | 0.687                       |
| Odds Ratio 95% CI                                |                 |                    | (0.175, 2.698)              |
| Odds Ratio P-value                               |                 |                    | 0.591                       |

Abbreviations: ITT, Intent-to-Treat Analysis set; N, number of randomized subjects; n, number of subjects within each category; Outcome definition, Reduction from baseline in SES-CD score  $\geq$  50%; Proc Logistic used to generate Odds Ratios and P-values.

Program Name: MUCUS-Shell16-V01-NC  
 Output Location: .\Output\Shared\MUCUS-TFLS-Final-27MAR24-V01.pdf

Table 14.2.3.2: Summary of Endoscopic Response at Week 52: Per-Protocol Analysis Set

|                                                  | Naive<br>(N=6) | Biologic<br>(N=11) | Multiple Biologic<br>(N=8) |
|--------------------------------------------------|----------------|--------------------|----------------------------|
| Endoscopic Response                              |                |                    |                            |
| Week 52                                          |                |                    |                            |
| N                                                | 6              | 11                 | 8                          |
| [Responder] n(%)                                 | 3 (50.0%)      | 6 (54.5%)          | 6 (75.0%)                  |
| [Non-Responder] n(%)                             | 3 (50.0%)      | 5 (45.5%)          | 2 (25.0%)                  |
| [Responder] Odds Ratio Strata 1 vs Strata 2 or 3 |                | 0.833              | 0.333                      |
| Odds Ratio 95% CI                                |                | (0.114, 6.111)     | (0.035, 3.205)             |
| Odds Ratio P-value                               |                | 0.858              | 0.341                      |
| [Responder] Odds Ratio Strata 2 vs Strata 3      |                |                    | 0.400                      |
| Odds Ratio 95% CI                                |                |                    | (0.055, 2.933)             |
| Odds Ratio P-value                               |                |                    | 0.367                      |

Abbreviations: N, number of randomized subjects; n, number of subjects within each category; Outcome definition, Reduction from baseline in SES-CD score  $\geq$  50%; Proc Logistic used to generate Odds Ratios and P-values.

Program Name: MUCUS-Shell6-V01-NC

Output Location: .\Output\Shared\MUCUS-TFLS-Final-27MAR24-V01.pdf



Table 14.2.4.1: Summary of Endoscopic Remission at Week 26 and 52: ITT Population

|                                                 | Naive<br>(N=14) | Biologic<br>(N=22) | Multiple Biologic<br>(N=17) |
|-------------------------------------------------|-----------------|--------------------|-----------------------------|
| Endoscopic Remission                            |                 |                    |                             |
| Week 26                                         |                 |                    |                             |
| N                                               | 1               | -                  | -                           |
| [Remitter] n(%)                                 | -               | -                  | -                           |
| [Non-Remitter] n(%)                             | 1 (100.0%)      | -                  | -                           |
| Week 52                                         |                 |                    |                             |
| N                                               | 13              | 22                 | 17                          |
| [Remitter] n(%)                                 | 3 (23.1%)       | 3 (13.6%)          | 3 (17.6%)                   |
| [Non-Remitter] n(%)                             | 10 (76.9%)      | 19 (86.4%)         | 14 (82.4%)                  |
| [Remitter] Odds Ratio Strata 1 vs Strata 2 or 3 |                 | 1.900              | 1.400                       |
| Odds Ratio 95% CI                               |                 | (0.322, 11.200)    | (0.233, 8.421)              |
| Odds Ratio P-value                              |                 | 0.478              | 0.713                       |
| [Remitter] Odds Ratio Strata 2 vs Strata 3      |                 |                    | 0.737                       |
| Odds Ratio 95% CI                               |                 |                    | (0.129, 4.210)              |
| Odds Ratio P-value                              |                 |                    | 0.731                       |

Abbreviations: ITT, Intent-to-Treat Analysis set; N, number of randomized subjects; n, number of subjects within each category; Outcome definition, SES-CD score <=2; Proc Logistic used to generate Odds Ratios and P-values.

Program Name: MUCUS-Shell6-V01-NC  
 Output Location: .\Output\Shared\MUCUS-TFLS-Final-27MAR24-V01.pdf

Table 14.2.4.2: Summary of Endoscopic Remission at Week 26 and 52: Per-Protocol Analysis Set

|                                                 | Naive<br>(N=7) | Biologic<br>(N=11) | Multiple Biologic<br>(N=8) |
|-------------------------------------------------|----------------|--------------------|----------------------------|
| Endoscopic Remission                            |                |                    |                            |
| Week 26                                         |                |                    |                            |
| N                                               | 1              | -                  | -                          |
| [Remitter] n(%)                                 | -              | -                  | -                          |
| [Non-Remitter] n(%)                             | 1 (100.0%)     | -                  | -                          |
| Week 52                                         |                |                    |                            |
| N                                               | 6              | 11                 | 8                          |
| [Remitter] n(%)                                 | 3 (50.0%)      | 3 (27.3%)          | 3 (37.5%)                  |
| [Non-Remitter] n(%)                             | 3 (50.0%)      | 8 (72.7%)          | 5 (62.5%)                  |
| [Remitter] Odds Ratio Strata 1 vs Strata 2 or 3 |                | 2.666              | 1.667                      |
| Odds Ratio 95% CI                               |                | (0.333, 21.317)    | (0.195, 14.266)            |
| Odds Ratio P-value                              |                | 0.355              | 0.641                      |
| [Remitter] Odds Ratio Strata 2 vs Strata 3      |                |                    | 0.625                      |
| Odds Ratio 95% CI                               |                |                    | (0.089, 4.401)             |
| Odds Ratio P-value                              |                |                    | 0.637                      |

Abbreviations: N, number of randomized subjects; n, number of subjects within each category; Outcome definition, SES-CD score  $\leq 2$ ; Proc Logistic used to generate Odds Ratios and P-values.

Program Name: MUCUS-Shell6-V01-NC

Output Location: .\Output\Shared\MUCUS-TFLS-Final-27MAR24-V01.pdf

Table 14.2.5.1: Summary of Mucosal Healing Rate at Week 26 and 52: ITT Population

|                                                  | Naive<br>(N=14) | Biologic<br>(N=22) | Multiple Biologic<br>(N=17) |
|--------------------------------------------------|-----------------|--------------------|-----------------------------|
| Mucosal Healing                                  |                 |                    |                             |
| Week 26                                          |                 |                    |                             |
| N                                                | 1               | -                  | -                           |
| [Responder] n(%)                                 | 1 (100.0%)      | -                  | -                           |
| [Non-Responder] n(%)                             | -               | -                  | -                           |
| Week 52                                          |                 |                    |                             |
| N                                                | 13              | 22                 | 17                          |
| [Responder] n(%)                                 | 3 (23.1%)       | 4 (18.2%)          | 6 (35.3%)                   |
| [Non-Responder] n(%)                             | 10 (76.9%)      | 18 (81.8%)         | 11 (64.7%)                  |
| [Responder] Odds Ratio Strata 1 vs Strata 2 or 3 |                 | 1.350              | 0.550                       |
| Odds Ratio 95% CI                                |                 | (0.250, 7.278)     | (0.108, 2.805)              |
| Odds Ratio P-value                               |                 | 0.727              | 0.472                       |
| [Responder] Odds Ratio Strata 2 vs Strata 3      |                 |                    | 0.407                       |
| Odds Ratio 95% CI                                |                 |                    | (0.094, 1.773)              |
| Odds Ratio P-value                               |                 |                    | 0.231                       |

Abbreviations: ITT, Intent-to-Treat Analysis set; N, number of randomized subjects; n, number of subjects within each category; Outcome definition, Complete absence of mucosal ulcerations; Proc Logistic used to generate Odds Ratios and P-values;

Program Name: MUCUS-Shell6-V01-NC  
 Output Location: .\Output\Shared\MUCUS-TFLS-Final-27MAR24-V01.pdf

Table 14.2.5.2: Summary of Mucosal Healing Rate at Week 26 and 52: Per-Protocol Analysis Set

|                                                  | Naive<br>(N=7) | Biologic<br>(N=11) | Multiple Biologic<br>(N=8) |
|--------------------------------------------------|----------------|--------------------|----------------------------|
| Mucosal Healing                                  |                |                    |                            |
| Week 26                                          |                |                    |                            |
| N                                                | 1              | -                  | -                          |
| [Responder] n(%)                                 | 1 (100.0%)     | -                  | -                          |
| [Non-Responder] n(%)                             | -              | -                  | -                          |
| Week 52                                          |                |                    |                            |
| N                                                | 6              | 11                 | 8                          |
| [Responder] n(%)                                 | 3 (50.0%)      | 4 (36.4%)          | 5 (62.5%)                  |
| [Non-Responder] n(%)                             | 3 (50.0%)      | 7 (63.6%)          | 3 (37.5%)                  |
| [Responder] Odds Ratio Strata 1 vs Strata 2 or 3 |                | 1.750              | 0.600                      |
| Odds Ratio 95% CI                                |                | (0.233, 13.158)    | (0.070, 5.136)             |
| Odds Ratio P-value                               |                | 0.587              | 0.641                      |
| [Responder] Odds Ratio Strata 2 vs Strata 3      |                |                    | 0.343                      |
| Odds Ratio 95% CI                                |                |                    | (0.052, 2.261)             |
| Odds Ratio P-value                               |                |                    | 0.266                      |

Abbreviations: N, number of randomized subjects; n, number of subjects within each category; Outcome definition, Complete absence of mucosal ulcerations; Proc Logistic used to generate Odds Ratios and P-values.

Program Name: MUCUS-Shell6-V01-NC

Output Location: .\Output\Shared\MUCUS-TFLS-Final-27MAR24-V01.pdf

Table 14.2.6: Summary of Clinical Remission at Week 8, 16, 26, 36, 52: ITT Population

|                                                 | Naive<br>(N=13) | Biologic<br>(N=22) | Multiple Biologic<br>(N=17) |
|-------------------------------------------------|-----------------|--------------------|-----------------------------|
| <b>Clinical Remission</b>                       |                 |                    |                             |
| <b>Week 8</b>                                   |                 |                    |                             |
| N                                               | 12              | 21                 | 14                          |
| [Remitter] n(%)                                 | 7 (58.3%)       | 11 (52.4%)         | 11 (78.6%)                  |
| [Non-Remitter] n(%)                             | 5 (41.7%)       | 10 (47.6%)         | 3 (21.4%)                   |
| [Remitter] Odds Ratio Strata 1 vs Strata 2 or 3 |                 | 1.280              | 0.227                       |
| Odds Ratio 95% CI                               |                 | (0.116, 14.164)    | (0.014, 3.566)              |
| Odds Ratio P-value                              |                 | 0.839              | 0.289                       |
| [Remitter] Odds Ratio Strata 2 vs Strata 3      |                 |                    | 0.177                       |
| Odds Ratio 95% CI                               |                 |                    | (0.015, 2.061)              |
| Odds Ratio P-value                              |                 |                    | 0.165                       |
| <b>Week 16</b>                                  |                 |                    |                             |
| N                                               | 9               | 19                 | 13                          |
| [Remitter] n(%)                                 | 8 (88.9%)       | 8 (42.1%)          | 9 (69.2%)                   |
| [Non-Remitter] n(%)                             | 1 (11.1%)       | 11 (57.9%)         | 4 (30.8%)                   |
| [Remitter] Odds Ratio Strata 1 vs Strata 2 or 3 |                 | 40.237             | 7.517                       |
| Odds Ratio 95% CI                               |                 | (1.219, 1328.3)    | (0.204, 276.47)             |
| Odds Ratio P-value                              |                 | 0.039              | 0.270                       |
| [Remitter] Odds Ratio Strata 2 vs Strata 3      |                 |                    | 0.187                       |
| Odds Ratio 95% CI                               |                 |                    | (0.017, 2.047)              |
| Odds Ratio P-value                              |                 |                    | 0.168                       |
| <b>Week 26</b>                                  |                 |                    |                             |
| N                                               | 7               | 13                 | 7                           |
| [Remitter] n(%)                                 | 5 (71.4%)       | 6 (46.2%)          | 7 (100.0%)                  |
| [Non-Remitter] n(%)                             | 2 (28.6%)       | 7 (53.8%)          | -                           |
| [Remitter] Odds Ratio Strata 1 vs Strata 2 or 3 |                 | 7.360              | <0.001                      |

Abbreviations: ITT, Intent-to-Treat Analysis set; N, number of randomized subjects; n, number of subjects within each category; Outcome definition, Harvey Bradshaw Index <=4; Proc GLIMMIX used to generate Odds Ratios and P-values.

Program Name: MUCUS-Shell16-V01-NC  
 Output Location: .\Output\Shared\MUCUS-TFLS-Final-27MAR24-V01.pdf

Table 14.2.6: Summary of Clinical Remission at Week 8, 16, 26, 36, 52: ITT Population

|                                                 | Naive<br>(N=13) | Biologic<br>(N=22) | Multiple Biologic<br>(N=17) |
|-------------------------------------------------|-----------------|--------------------|-----------------------------|
| Odds Ratio 95% CI                               |                 | (0.320, 169.29)    | (<0.001, NE)                |
| Odds Ratio P-value                              |                 | 0.210              | 0.992                       |
| [Remitter] Odds Ratio Strata 2 vs Strata 3      |                 |                    | <0.001                      |
| Odds Ratio 95% CI                               |                 |                    | (<0.001, NE)                |
| Odds Ratio P-value                              |                 |                    | 0.991                       |
| <b>Week 36</b>                                  |                 |                    |                             |
| N                                               | 8               | 10                 | 9                           |
| [Remitter] n(%)                                 | 6 (75.0%)       | 5 (50.0%)          | 6 (66.7%)                   |
| [Non-Remitter] n(%)                             | 2 (25.0%)       | 5 (50.0%)          | 3 (33.3%)                   |
| [Remitter] Odds Ratio Strata 1 vs Strata 2 or 3 |                 | 11.165             | 2.733                       |
| Odds Ratio 95% CI                               |                 | (0.393, 317.28)    | (0.096, 77.528)             |
| Odds Ratio P-value                              |                 | 0.156              | 0.553                       |
| [Remitter] Odds Ratio Strata 2 vs Strata 3      |                 |                    | 0.245                       |
| Odds Ratio 95% CI                               |                 |                    | (0.014, 4.233)              |
| Odds Ratio P-value                              |                 |                    | 0.330                       |
| <b>Week 52</b>                                  |                 |                    |                             |
| N                                               | 13              | 22                 | 17                          |
| [Remitter] n(%)                                 | 7 (53.8%)       | 10 (45.5%)         | 7 (41.2%)                   |
| [Non-Remitter] n(%)                             | 6 (46.2%)       | 12 (54.5%)         | 10 (58.8%)                  |
| [Remitter] Odds Ratio Strata 1 vs Strata 2 or 3 |                 | 1.620              | 2.210                       |
| Odds Ratio 95% CI                               |                 | (0.157, 16.670)    | (0.190, 25.711)             |
| Odds Ratio P-value                              |                 | 0.683              | 0.524                       |
| [Remitter] Odds Ratio Strata 2 vs Strata 3      |                 |                    | 1.364                       |
| Odds Ratio 95% CI                               |                 |                    | (0.159, 11.716)             |
| Odds Ratio P-value                              |                 |                    | 0.776                       |

Abbreviations: ITT, Intent-to-Treat Analysis set; N, number of randomized subjects; n, number of subjects within each category; Outcome definition, Harvey Bradshaw Index <=4; Proc GLIMMIX used to generate Odds Ratios and P-values.

Table 14.2.7: Summary of Steroid Free Clinical Remission at Week 8, 16, 26, 36, 52

|                                                 | Naive<br>(N=13) | Biologic<br>(N=22) | Multiple Biologic<br>(N=17) |
|-------------------------------------------------|-----------------|--------------------|-----------------------------|
| <b>Steroid Free Clinical Remission</b>          |                 |                    |                             |
| <b>Week 8</b>                                   |                 |                    |                             |
| N                                               | 6               | 4                  | 9                           |
| [Remitter] n(%)                                 | -               | -                  | -                           |
| [Non-Remitter] n(%)                             | 6 (100.0%)      | 4 (100.0%)         | 9 (100.0%)                  |
| [Remitter] Odds Ratio Strata 1 vs Strata 2 or 3 |                 | 1722.2             | <0.001                      |
| Odds Ratio 95% CI                               |                 | (0.018, 1.65E8)    | (<0.001, 3.542)             |
| Odds Ratio P-value                              |                 | 0.197              | 0.078                       |
| [Remitter] Odds Ratio Strata 2 vs Strata 3      |                 |                    | <0.001                      |
| Odds Ratio 95% CI                               |                 |                    | (<0.001, <0.001)            |
| Odds Ratio P-value                              |                 |                    | <.001                       |
| <b>Week 16</b>                                  |                 |                    |                             |
| N                                               | 4               | 4                  | 8                           |
| [Remitter] n(%)                                 | 2 (50.0%)       | 1 (25.0%)          | 2 (25.0%)                   |
| [Non-Remitter] n(%)                             | 2 (50.0%)       | 3 (75.0%)          | 6 (75.0%)                   |
| [Remitter] Odds Ratio Strata 1 vs Strata 2 or 3 |                 | 3137.3             | 7.325                       |
| Odds Ratio 95% CI                               |                 | (0.009, 1.07E9)    | (<0.001, 832000)            |
| Odds Ratio P-value                              |                 | 0.209              | 0.732                       |
| [Remitter] Odds Ratio Strata 2 vs Strata 3      |                 |                    | 0.002                       |
| Odds Ratio 95% CI                               |                 |                    | (<0.001, 1490.5)            |
| Odds Ratio P-value                              |                 |                    | 0.365                       |
| <b>Week 26</b>                                  |                 |                    |                             |
| N                                               | 3               | 2                  | 4                           |
| [Remitter] n(%)                                 | -               | 1 (50.0%)          | 1 (25.0%)                   |
| [Non-Remitter] n(%)                             | 3 (100.0%)      | 1 (50.0%)          | 3 (75.0%)                   |
| [Remitter] Odds Ratio Strata 1 vs Strata 2 or 3 |                 | <0.001             | <0.001                      |

Abbreviations: ITT, Intent-to-Treat Analysis set; N, number of randomized subjects; n, number of subjects within each category; Outcome definition, Harvey Bradshaw index score of <= 4 and the absence of concomitant steroid therapy in subjects who were on steroids at baseline; Proc GLIMMIX used to generate Odds Ratios and P-values.

Table 14.2.7: Summary of Steroid Free Clinical Remission at Week 8, 16, 26, 36, 52

|                                                 | Naive<br>(N=13) | Biologic<br>(N=22) | Multiple Biologic<br>(N=17) |
|-------------------------------------------------|-----------------|--------------------|-----------------------------|
| Odds Ratio 95% CI                               |                 | (<0.001, 16937)    | (<0.001, <0.001)            |
| Odds Ratio P-value                              |                 | 0.145              | <.001                       |
| [Remitter] Odds Ratio Strata 2 vs Strata 3      |                 |                    | 0.302                       |
| Odds Ratio 95% CI                               |                 |                    | (<0.001, 784E12)            |
| Odds Ratio P-value                              |                 |                    | 0.946                       |
| Week 36                                         |                 |                    |                             |
| N                                               | 3               | 2                  | 5                           |
| [Remitter] n(%)                                 | 1 (33.3%)       | 1 (50.0%)          | 1 (20.0%)                   |
| [Non-Remitter] n(%)                             | 2 (66.7%)       | 1 (50.0%)          | 4 (80.0%)                   |
| [Remitter] Odds Ratio Strata 1 vs Strata 2 or 3 |                 | 72.704             | 25.196                      |
| Odds Ratio 95% CI                               |                 | (<0.001, 657E14)   | (<0.001, 8.51E6)            |
| Odds Ratio P-value                              |                 | 0.803              | 0.612                       |
| [Remitter] Odds Ratio Strata 2 vs Strata 3      |                 |                    | 0.347                       |
| Odds Ratio 95% CI                               |                 |                    | (<0.001, 784E12)            |
| Odds Ratio P-value                              |                 |                    | 0.952                       |
| Week 52                                         |                 |                    |                             |
| N                                               | 6               | 5                  | 9                           |
| [Remitter] n(%)                                 | 2 (33.3%)       | 2 (40.0%)          | 2 (22.2%)                   |
| [Non-Remitter] n(%)                             | 4 (66.7%)       | 3 (60.0%)          | 7 (77.8%)                   |
| [Remitter] Odds Ratio Strata 1 vs Strata 2 or 3 |                 | 0.091              | 0.671                       |
| Odds Ratio 95% CI                               |                 | (<0.001, 8755.5)   | (<0.001, 122002)            |
| Odds Ratio P-value                              |                 | 0.676              | 0.947                       |
| [Remitter] Odds Ratio Strata 2 vs Strata 3      |                 |                    | 7.342                       |
| Odds Ratio 95% CI                               |                 |                    | (<0.001, 77994)             |
| Odds Ratio P-value                              |                 |                    | 0.667                       |

Abbreviations: ITT, Intent-to-Treat Analysis set; N, number of randomized subjects; n, number of subjects within each category; Outcome definition, Harvey Bradshaw index score of <= 4 and the absence of concomitant steroid therapy in subjects who were on steroids at baseline; Proc GLIMMIX used to generate Odds Ratios and P-values.



Table 14.2.8.1: Summary of Fistula Response at Week 8, 16, 26, 36, 52

|                                                  | Naive<br>(N=13) | Biologic<br>(N=22) | Multiple Biologic<br>(N=17) |
|--------------------------------------------------|-----------------|--------------------|-----------------------------|
| <b>Fistulizing Crohns Response</b>               |                 |                    |                             |
| <b>Week 8</b>                                    |                 |                    |                             |
| N                                                | -               | 2                  | 3                           |
| [Responder] n(%)                                 | -               | 1 (50.0%)          | 2 (66.7%)                   |
| [Non-Responder] n(%)                             | -               | 1 (50.0%)          | 1 (33.3%)                   |
| [Responder] Odds Ratio Strata 1 vs Strata 2 or 3 |                 | -                  | -                           |
| Odds Ratio 95% CI                                |                 | -                  | -                           |
| Odds Ratio P-value                               |                 | -                  | -                           |
| [Responder] Odds Ratio Strata 2 vs Strata 3      |                 |                    | 0.431                       |
| Odds Ratio 95% CI                                |                 |                    | (<0.001, 118E9)             |
| Odds Ratio P-value                               |                 |                    | 0.938                       |
| <b>Week 16</b>                                   |                 |                    |                             |
| N                                                | -               | 2                  | 3                           |
| [Responder] n(%)                                 | -               | 1 (50.0%)          | 2 (66.7%)                   |
| [Non-Responder] n(%)                             | -               | 1 (50.0%)          | 1 (33.3%)                   |
| [Responder] Odds Ratio Strata 1 vs Strata 2 or 3 |                 | -                  | -                           |
| Odds Ratio 95% CI                                |                 | -                  | -                           |
| Odds Ratio P-value                               |                 | -                  | -                           |
| [Responder] Odds Ratio Strata 2 vs Strata 3      |                 |                    | 0.432                       |
| Odds Ratio 95% CI                                |                 |                    | (<0.001, 118E9)             |
| Odds Ratio P-value                               |                 |                    | 0.938                       |
| <b>Week 26</b>                                   |                 |                    |                             |
| N                                                | -               | -                  | -                           |
| [Responder] n(%)                                 | -               | -                  | -                           |
| [Non-Responder] n(%)                             | -               | -                  | -                           |
| [Responder] Odds Ratio Strata 1 vs Strata 2 or 3 |                 | -                  | -                           |

Abbreviations: ITT, Intent-to-Treat Analysis set; N, number of randomized subjects; n, number of subjects within each category; Outcome definition, For patients with baseline Perianal Disease Activity Index (PDAI) score  $\geq 4$  follow up PDAI=0 indicates remission; Proc Glimmix used to generate Odds Ratios and P-values.

Program Name: MUCUS-Shell16-V01-NC  
 Output Location: .\Output\Shared\MUCUS-TFLS-Final-27MAR24-V01.pdf

Table 14.2.8.1: Summary of Fistula Response at Week 8, 16, 26, 36, 52

|                                                  | Naive<br>(N=13) | Biologic<br>(N=22) | Multiple Biologic<br>(N=17) |
|--------------------------------------------------|-----------------|--------------------|-----------------------------|
| Odds Ratio 95% CI                                |                 | -                  | -                           |
| Odds Ratio P-value                               |                 | -                  | -                           |
| [Responder] Odds Ratio Strata 2 vs Strata 3      |                 |                    | -                           |
| Odds Ratio 95% CI                                |                 |                    | -                           |
| Odds Ratio P-value                               |                 |                    | -                           |
| Week 36                                          |                 |                    |                             |
| N                                                | -               | -                  | -                           |
| [Responder] n(%)                                 | -               | -                  | -                           |
| [Non-Responder] n(%)                             | -               | -                  | -                           |
| [Responder] Odds Ratio Strata 1 vs Strata 2 or 3 |                 | -                  | -                           |
| Odds Ratio 95% CI                                |                 | -                  | -                           |
| Odds Ratio P-value                               |                 | -                  | -                           |
| [Responder] Odds Ratio Strata 2 vs Strata 3      |                 |                    | -                           |
| Odds Ratio 95% CI                                |                 |                    | -                           |
| Odds Ratio P-value                               |                 |                    | -                           |
| Week 52                                          |                 |                    |                             |
| N                                                | -               | 1                  | 3                           |
| [Responder] n(%)                                 | -               | 1 (100.0%)         | 3 (100.0%)                  |
| [Non-Responder] n(%)                             | -               | -                  | -                           |
| [Responder] Odds Ratio Strata 1 vs Strata 2 or 3 |                 | -                  | -                           |
| Odds Ratio 95% CI                                |                 | -                  | -                           |
| Odds Ratio P-value                               |                 | -                  | -                           |
| [Responder] Odds Ratio Strata 2 vs Strata 3      |                 |                    | 19.042                      |
| Odds Ratio 95% CI                                |                 |                    | (<0.001, 5189E9)            |
| Odds Ratio P-value                               |                 |                    | 0.785                       |

Abbreviations: ITT, Intent-to-Treat Analysis set; N, number of randomized subjects; n, number of subjects within each category; Outcome definition, For patients with baseline Perianal Disease Activity Index (PDAI) score  $\geq 4$  follow up PDAI=0 indicates remission; Proc Glimmix used to generate Odds Ratios and P-values.

Table 14.2.8.2: Summary of Fistula Remission at Week 8, 16, 26, 36, 52

|                                                 | Naive<br>(N=13) | Biologic<br>(N=22) | Multiple Biologic<br>(N=17) |
|-------------------------------------------------|-----------------|--------------------|-----------------------------|
| <b>Fistulizing Crohns Remission</b>             |                 |                    |                             |
| <b>Week 8</b>                                   |                 |                    |                             |
| N                                               | -               | 2                  | 3                           |
| [Remitter] n(%)                                 | -               | -                  | 1 (33.3%)                   |
| [Non-Remitter] n(%)                             | -               | 2 (100.0%)         | 2 (66.7%)                   |
| [Remitter] Odds Ratio Strata 1 vs Strata 2 or 3 |                 | -                  | -                           |
| Odds Ratio 95% CI                               |                 | -                  | -                           |
| Odds Ratio P-value                              |                 | -                  | -                           |
| [Remitter] Odds Ratio Strata 2 vs Strata 3      |                 |                    | <0.001                      |
| Odds Ratio 95% CI                               |                 |                    | (NE, NE)                    |
| Odds Ratio P-value                              |                 |                    | <.001                       |
| <b>Week 16</b>                                  |                 |                    |                             |
| N                                               | -               | 2                  | 3                           |
| [Remitter] n(%)                                 | -               | -                  | 1 (33.3%)                   |
| [Non-Remitter] n(%)                             | -               | 2 (100.0%)         | 2 (66.7%)                   |
| [Remitter] Odds Ratio Strata 1 vs Strata 2 or 3 |                 | -                  | -                           |
| Odds Ratio 95% CI                               |                 | -                  | -                           |
| Odds Ratio P-value                              |                 | -                  | -                           |
| [Remitter] Odds Ratio Strata 2 vs Strata 3      |                 |                    | <0.001                      |
| Odds Ratio 95% CI                               |                 |                    | (NE, NE)                    |
| Odds Ratio P-value                              |                 |                    | <.001                       |
| <b>Week 26</b>                                  |                 |                    |                             |
| N                                               | -               | -                  | -                           |
| [Remitter] n(%)                                 | -               | -                  | -                           |
| [Non-Remitter] n(%)                             | -               | -                  | -                           |
| [Remitter] Odds Ratio Strata 1 vs Strata 2 or 3 |                 | -                  | -                           |

Abbreviations: ITT, Intent-to-Treat Analysis set; N, number of randomized subjects; n, number of subjects within each category; Outcome definition, For patients with baseline Perianal Disease Activity Index (PDAI) score  $\geq 4$  a follow up  $0 < \text{PDAI} < 4$  indicates response ; Proc Glimmix used to generate Odds Ratios and P-values.

Table 14.2.8.2: Summary of Fistula Remission at Week 8, 16, 26, 36, 52

|                                                 | Naive<br>(N=13) | Biologic<br>(N=22) | Multiple Biologic<br>(N=17) |
|-------------------------------------------------|-----------------|--------------------|-----------------------------|
| Odds Ratio 95% CI                               |                 | -                  | -                           |
| Odds Ratio P-value                              |                 | -                  | -                           |
| [Remitter] Odds Ratio Strata 2 vs Strata 3      |                 |                    | -                           |
| Odds Ratio 95% CI                               |                 |                    | -                           |
| Odds Ratio P-value                              |                 |                    | -                           |
| Week 36                                         |                 |                    |                             |
| N                                               | -               | -                  | -                           |
| [Remitter] n(%)                                 | -               | -                  | -                           |
| [Non-Remitter] n(%)                             | -               | -                  | -                           |
| [Remitter] Odds Ratio Strata 1 vs Strata 2 or 3 |                 | -                  | -                           |
| Odds Ratio 95% CI                               |                 | -                  | -                           |
| Odds Ratio P-value                              |                 | -                  | -                           |
| [Remitter] Odds Ratio Strata 2 vs Strata 3      |                 |                    | -                           |
| Odds Ratio 95% CI                               |                 |                    | -                           |
| Odds Ratio P-value                              |                 |                    | -                           |
| Week 52                                         |                 |                    |                             |
| N                                               | -               | 1                  | 3                           |
| [Remitter] n(%)                                 | -               | -                  | 1 (33.3%)                   |
| [Non-Remitter] n(%)                             | -               | 1 (100.0%)         | 2 (66.7%)                   |
| [Remitter] Odds Ratio Strata 1 vs Strata 2 or 3 |                 | -                  | -                           |
| Odds Ratio 95% CI                               |                 | -                  | -                           |
| Odds Ratio P-value                              |                 | -                  | -                           |
| [Remitter] Odds Ratio Strata 2 vs Strata 3      |                 |                    | <0.001                      |
| Odds Ratio 95% CI                               |                 |                    | (NE, NE)                    |
| Odds Ratio P-value                              |                 |                    | <.001                       |

Abbreviations: ITT, Intent-to-Treat Analysis set; N, number of randomized subjects; n, number of subjects within each category; Outcome definition, For patients with baseline Perianal Disease Activity Index (PDAI) score  $\geq 4$  a follow up  $0 < \text{PDAI} < 4$  indicates response ; Proc Glimmix used to generate Odds Ratios and P-values.

Program Name: MUCUS-Shell16-V01-NC  
 Output Location: .\Output\Shared\MUCUS-TFLS-Final-27MAR24-V01.pdf

Table 14.2.9: Summary of Mean Change in PDAI Score from Baseline at Week 8, 16, 26, 36, 52

|                                                | Naive<br>(N=13) | Biologic<br>(N=22)    | Multiple Biologic<br>(N=17) |
|------------------------------------------------|-----------------|-----------------------|-----------------------------|
| <b>Perianal Disease Activity Index</b>         |                 |                       |                             |
| <b>Baseline: OBS</b>                           |                 |                       |                             |
| N                                              | 13              | 22                    | 16                          |
| Missing                                        | 0               | 0                     | 1                           |
| Mean (SD)                                      | 0.0 (0.00)      | 0.9 (3.12)            | 2.7 (4.98)                  |
| Median (min, max)                              | 0.0 (0, 0)      | 0.0 (0, 14)           | 0.0 (0, 17)                 |
| <b>Week 8: OBS</b>                             |                 |                       |                             |
| N                                              | 12              | 21                    | 14                          |
| Missing                                        | 1               | 1                     | 3                           |
| Mean (SD)                                      | 0.2 (0.58)      | 0.8 (3.06)            | 1.2 (3.47)                  |
| Median (min, max)                              | 0.0 (0, 2)      | 0.0 (0, 14)           | 0.0 (0, 13)                 |
| <b>Week 8: CHG</b>                             |                 |                       |                             |
| N                                              | 12              | 21                    | 13                          |
| Missing                                        | 1               | 1                     | 4                           |
| Mean (SD)                                      | 0.2 (0.58)      | -0.1 (0.65)           | -1.2 (2.44)                 |
| Median (min, max)                              | 0.0 (0, 2)      | 0.0 (-3, 0)           | 0.0 (-8, 0)                 |
| LS Means (SE)                                  | 0.2 (0.57)      | -0.1 (0.43)           | -1.2 (0.55)                 |
| LS Means Strata 1 vs (2 or 3) (95% CI) P-Value |                 | 0.3 (-1.1, 1.7) 0.668 | 1.3 (-0.3, 2.9) 0.101       |
| LS Means Strata 2 vs 3 (95% CI) P-Value        |                 |                       | 1.0 (-0.4, 2.4) 0.153       |
| <b>Week 16: OBS</b>                            |                 |                       |                             |
| N                                              | 9               | 19                    | 13                          |
| Missing                                        | 4               | 3                     | 4                           |
| Mean (SD)                                      | 0.6 (1.67)      | 0.9 (2.42)            | 1.1 (2.56)                  |
| Median (min, max)                              | 0.0 (0, 5)      | 0.0 (0, 9)            | 0.0 (0, 9)                  |
| <b>Week 16: CHG</b>                            |                 |                       |                             |
| N                                              | 9               | 19                    | 12                          |
| Missing                                        | 4               | 3                     | 5                           |
| Mean (SD)                                      | 0.6 (1.67)      | -0.1 (1.97)           | -1.6 (3.12)                 |
| Median (min, max)                              | 0.0 (0, 5)      | 0.0 (-5, 6)           | 0.0 (-8, 0)                 |
| LS Means (SE)                                  | 0.6 (0.60)      | -0.1 (0.44)           | -1.5 (0.56)                 |

Abbreviations: ITT, Intent-to-Treat Analysis set; N, number of randomized subjects; n, number of subjects within each category; SD, Standard Deviation; min, minimum; max, maximum; SE, Standard Error; PDAI, Perianal Disease Activity Index; Proc Mixed used to generate LS Means and P-values.

Table 14.2.9: Summary of Mean Change in PDAI Score from Baseline at Week 8, 16, 26, 36, 52

|                                                | Naive<br>(N=13) | Biologic<br>(N=22)     | Multiple Biologic<br>(N=17) |
|------------------------------------------------|-----------------|------------------------|-----------------------------|
| LS Means Strata 1 vs (2 or 3) (95% CI) P-Value |                 | 0.7 (-0.8, 2.2) 0.371  | 2.0 (0.4, 3.7) 0.015        |
| LS Means Strata 2 vs 3 (95% CI) P-Value        |                 |                        | 1.4 (-0.0, 2.8) 0.058       |
| Week 26: OBS                                   |                 |                        |                             |
| N                                              | 7               | 13                     | 7                           |
| Missing                                        | 6               | 9                      | 10                          |
| Mean (SD)                                      | 0.0 (0.00)      | 0.5 (1.94)             | 0.0 (0.00)                  |
| Median (min, max)                              | 0.0 (0, 0)      | 0.0 (0, 7)             | 0.0 (0, 0)                  |
| Week 26: CHG                                   |                 |                        |                             |
| N                                              | 7               | 13                     | 7                           |
| Missing                                        | 6               | 9                      | 10                          |
| Mean (SD)                                      | 0.0 (0.00)      | 0.5 (1.94)             | 0.0 (0.00)                  |
| Median (min, max)                              | 0.0 (0, 0)      | 0.0 (0, 7)             | 0.0 (0, 0)                  |
| LS Means (SE)                                  | 0.2 (0.64)      | 0.3 (0.48)             | -1.3 (0.63)                 |
| LS Means Strata 1 vs (2 or 3) (95% CI) P-Value |                 | -0.1 (-1.6, 1.5) 0.946 | 1.5 (-0.3, 3.3) 0.092       |
| LS Means Strata 2 vs 3 (95% CI) P-Value        |                 |                        | 1.6 (0.0, 3.1) 0.048        |
| Week 36: OBS                                   |                 |                        |                             |
| N                                              | 8               | 10                     | 9                           |
| Missing                                        | 5               | 12                     | 8                           |
| Mean (SD)                                      | 0.0 (0.00)      | 0.0 (0.00)             | 0.0 (0.00)                  |
| Median (min, max)                              | 0.0 (0, 0)      | 0.0 (0, 0)             | 0.0 (0, 0)                  |
| Week 36: CHG                                   |                 |                        |                             |
| N                                              | 8               | 10                     | 9                           |
| Missing                                        | 5               | 12                     | 8                           |
| Mean (SD)                                      | 0.0 (0.00)      | 0.0 (0.00)             | 0.0 (0.00)                  |
| Median (min, max)                              | 0.0 (0, 0)      | 0.0 (0, 0)             | 0.0 (0, 0)                  |
| LS Means (SE)                                  | 0.1 (0.62)      | -0.4 (0.51)            | -1.3 (0.59)                 |
| LS Means Strata 1 vs (2 or 3) (95% CI) P-Value |                 | 0.5 (-1.1, 2.1) 0.546  | 1.4 (-0.3, 3.2) 0.095       |
| LS Means Strata 2 vs 3 (95% CI) P-Value        |                 |                        | 1.0 (-0.6, 2.5) 0.221       |
| Week 52: OBS                                   |                 |                        |                             |
| N                                              | 9               | 17                     | 12                          |

Abbreviations: ITT, Intent-to-Treat Analysis set; N, number of randomized subjects; n, number of subjects within each category; SD, Standard Deviation; min, minimum; max, maximum; SE, Standard Error; PDAI, Perianal Disease Activity Index; Proc Mixed used to generate LS Means and P-values.

Program Name: MUCUS-Shell17-V01-NC  
 Output Location: .\Output\Shared\MUCUS-TFLS-Final-27MAR24-V01.pdf

Table 14.2.9: Summary of Mean Change in PDAI Score from Baseline at Week 8, 16, 26, 36, 52

|                                                | Naive<br>(N=13) | Biologic<br>(N=22)    | Multiple Biologic<br>(N=17) |
|------------------------------------------------|-----------------|-----------------------|-----------------------------|
| Missing                                        | 4               | 5                     | 5                           |
| Mean (SD)                                      | 0.0 (0.00)      | 0.2 (0.73)            | 0.7 (1.23)                  |
| Median (min, max)                              | 0.0 (0, 0)      | 0.0 (0, 3)            | 0.0 (0, 3)                  |
| Week 52: CHG                                   |                 |                       |                             |
| N                                              | 9               | 17                    | 11                          |
| Missing                                        | 4               | 5                     | 6                           |
| Mean (SD)                                      | 0.0 (0.00)      | -0.1 (0.49)           | -2.2 (4.60)                 |
| Median (min, max)                              | 0.0 (0, 0)      | 0.0 (-2, 0)           | 0.0 (-14, 0)                |
| LS Means (SE)                                  | 0.1 (0.61)      | -0.2 (0.45)           | -2.0 (0.57)                 |
| LS Means Strata 1 vs (2 or 3) (95% CI) P-Value |                 | 0.4 (-1.1, 1.9) 0.627 | 2.1 (0.4, 3.8) 0.013        |
| LS Means Strata 2 vs 3 (95% CI) P-Value        |                 |                       | 1.7 (0.3, 3.2) 0.019        |

Abbreviations: ITT, Intent-to-Treat Analysis set; N, number of randomized subjects; n, number of subjects within each category; SD, Standard Deviation; min, minimum; max, maximum; SE, Standard Error; PDAI, Perianal Disease Activity Index; Proc Mixed used to generate LS Means and P-values.

Program Name: MUCUS-Shell17-V01-NC

Output Location: .\Output\Shared\MUCUS-TFLS-Final-27MAR24-V01.pdf

Table 14.2.10: Summary of Mean Change in HBI Index from Baseline at Week 8, 16, 26, 36, 52

|                                                | Naive<br>(N=13) | Biologic<br>(N=22)     | Multiple Biologic<br>(N=17) |
|------------------------------------------------|-----------------|------------------------|-----------------------------|
| Harvey Bradshaw Index                          |                 |                        |                             |
| Baseline: OBS                                  |                 |                        |                             |
| N                                              | 13              | 21                     | 16                          |
| Missing                                        | 0               | 1                      | 1                           |
| Mean (SD)                                      | 9.4 (4.84)      | 8.8 (3.34)             | 10.4 (5.02)                 |
| Median (min, max)                              | 8.0 (5, 23)     | 7.0 (3, 15)            | 8.5 (5, 19)                 |
| Week 8: OBS                                    |                 |                        |                             |
| N                                              | 12              | 21                     | 14                          |
| Missing                                        | 1               | 1                      | 3                           |
| Mean (SD)                                      | 4.4 (2.11)      | 5.6 (5.89)             | 3.6 (2.47)                  |
| Median (min, max)                              | 4.0 (2, 8)      | 4.0 (1, 25)            | 3.5 (1, 9)                  |
| Week 8: CHG                                    |                 |                        |                             |
| N                                              | 12              | 20                     | 13                          |
| Missing                                        | 1               | 2                      | 4                           |
| Mean (SD)                                      | -4.8 (4.26)     | -3.3 (5.79)            | -5.9 (5.24)                 |
| Median (min, max)                              | -2.5 (-16, -2)  | -4.5 (-13, 10)         | -4.0 (-17, -1)              |
| LS Means (SE)                                  | -4.8 (1.44)     | -3.3 (1.12)            | -5.9 (1.38)                 |
| LS Means Strata 1 vs (2 or 3) (95% CI) P-Value |                 | -1.5 (-5.2, 2.1) 0.403 | 1.1 (-2.9, 5.1) 0.587       |
| LS Means Strata 2 vs 3 (95% CI) P-Value        |                 |                        | 2.6 (-0.9, 6.2) 0.145       |
| Week 16: OBS                                   |                 |                        |                             |
| N                                              | 9               | 19                     | 13                          |
| Missing                                        | 4               | 3                      | 4                           |
| Mean (SD)                                      | 3.4 (4.45)      | 5.3 (4.89)             | 3.7 (3.25)                  |
| Median (min, max)                              | 2.0 (1, 15)     | 5.0 (0, 19)            | 3.0 (0, 10)                 |
| Week 16: CHG                                   |                 |                        |                             |
| N                                              | 9               | 18                     | 12                          |
| Missing                                        | 4               | 4                      | 5                           |
| Mean (SD)                                      | -5.7 (1.94)     | -3.7 (5.20)            | -5.8 (5.94)                 |
| Median (min, max)                              | -5.0 (-8, -3)   | -4.5 (-14, 5)          | -4.5 (-17, 2)               |
| LS Means (SE)                                  | -5.4 (1.54)     | -3.1 (1.15)            | -5.4 (1.41)                 |

Abbreviations: ITT, Intent-to-Treat Analysis set; N, number of randomized subjects; n, number of subjects within each category; SD, Standard Deviation; min, minimum; max, maximum; SE, Standard Error; HBI, Harvey Bradshaw Index ; Proc Mixed used to generate LS Means and P-values.



Table 14.2.10: Summary of Mean Change in HBI Index from Baseline at Week 8, 16, 26, 36, 52

|                                                | Naive<br>(N=13) | Biologic<br>(N=22)     | Multiple Biologic<br>(N=17) |
|------------------------------------------------|-----------------|------------------------|-----------------------------|
| LS Means Strata 1 vs (2 or 3) (95% CI) P-Value |                 | -2.3 (-6.1, 1.5) 0.232 | -0.0 (-4.2, 4.1) 0.987      |
| LS Means Strata 2 vs 3 (95% CI) P-Value        |                 |                        | 2.3 (-1.3, 5.9) 0.214       |
| Week 26: OBS                                   |                 |                        |                             |
| N                                              | 7               | 13                     | 7                           |
| Missing                                        | 6               | 9                      | 10                          |
| Mean (SD)                                      | 4.0 (2.38)      | 6.2 (5.75)             | 1.3 (0.76)                  |
| Median (min, max)                              | 4.0 (1, 8)      | 5.0 (0, 22)            | 1.0 (0, 2)                  |
| Week 26: CHG                                   |                 |                        |                             |
| N                                              | 7               | 12                     | 7                           |
| Missing                                        | 6               | 10                     | 10                          |
| Mean (SD)                                      | -6.0 (4.32)     | -2.7 (5.90)            | -7.4 (4.86)                 |
| Median (min, max)                              | -5.0 (-15, -2)  | -3.5 (-13, 11)         | -5.0 (-17, -4)              |
| LS Means (SE)                                  | -5.6 (1.65)     | -2.1 (1.27)            | -6.7 (1.62)                 |
| LS Means Strata 1 vs (2 or 3) (95% CI) P-Value |                 | -3.5 (-7.6, 0.6) 0.097 | 1.1 (-3.5, 5.7) 0.627       |
| LS Means Strata 2 vs 3 (95% CI) P-Value        |                 |                        | 4.6 (0.5, 8.7) 0.027        |
| Week 36: OBS                                   |                 |                        |                             |
| N                                              | 8               | 10                     | 9                           |
| Missing                                        | 5               | 12                     | 8                           |
| Mean (SD)                                      | 3.9 (3.76)      | 4.4 (2.91)             | 2.6 (2.40)                  |
| Median (min, max)                              | 3.5 (0, 12)     | 4.0 (0, 9)             | 3.0 (0, 6)                  |
| Week 36: CHG                                   |                 |                        |                             |
| N                                              | 8               | 10                     | 9                           |
| Missing                                        | 5               | 12                     | 8                           |
| Mean (SD)                                      | -5.3 (2.92)     | -4.7 (5.36)            | -5.7 (5.48)                 |
| Median (min, max)                              | -4.5 (-11, -2)  | -3.5 (-14, 2)          | -5.0 (-18, -1)              |
| LS Means (SE)                                  | -5.9 (1.59)     | -4.5 (1.33)            | -6.0 (1.51)                 |
| LS Means Strata 1 vs (2 or 3) (95% CI) P-Value |                 | -1.4 (-5.5, 2.7) 0.504 | 0.1 (-4.2, 4.5) 0.952       |
| LS Means Strata 2 vs 3 (95% CI) P-Value        |                 |                        | 1.5 (-2.5, 5.5) 0.451       |
| Week 52: OBS                                   |                 |                        |                             |
| N                                              | 9               | 16                     | 12                          |

Abbreviations: ITT, Intent-to-Treat Analysis set; N, number of randomized subjects; n, number of subjects within each category; SD, Standard Deviation; min, minimum; max, maximum; SE, Standard Error; HBI, Harvey Bradshaw Index ; Proc Mixed used to generate LS Means and P-values.

Program Name: MUCUS-Shell17-V01-NC  
 Output Location: .\Output\Shared\MUCUS-TFLS-Final-27MAR24-V01.pdf

Table 14.2.10: Summary of Mean Change in HBI Index from Baseline at Week 8, 16, 26, 36, 52

|                                                | Naive<br>(N=13) | Biologic<br>(N=22)     | Multiple Biologic<br>(N=17) |
|------------------------------------------------|-----------------|------------------------|-----------------------------|
| Missing                                        | 4               | 6                      | 5                           |
| Mean (SD)                                      | 3.3 (5.72)      | 3.9 (2.70)             | 3.8 (3.35)                  |
| Median (min, max)                              | 1.0 (0, 16)     | 3.0 (0, 10)            | 2.5 (0, 11)                 |
| Week 52: CHG                                   |                 |                        |                             |
| N                                              | 9               | 16                     | 11                          |
| Missing                                        | 4               | 6                      | 6                           |
| Mean (SD)                                      | -6.9 (3.55)     | -4.8 (4.11)            | -5.6 (5.16)                 |
| Median (min, max)                              | -7.0 (-13, 0)   | -4.5 (-11, 0)          | -4.0 (-17, 0)               |
| LS Means (SE)                                  | -6.6 (1.54)     | -4.8 (1.18)            | -5.9 (1.43)                 |
| LS Means Strata 1 vs (2 or 3) (95% CI) P-Value |                 | -1.8 (-5.7, 2.0) 0.352 | -0.7 (-4.9, 3.5) 0.739      |
| LS Means Strata 2 vs 3 (95% CI) P-Value        |                 |                        | 1.1 (-2.6, 4.8) 0.550       |

Abbreviations: ITT, Intent-to-Treat Analysis set; N, number of randomized subjects; n, number of subjects within each category; SD, Standard Deviation; min, minimum; max, maximum; SE, Standard Error; HBI, Harvey Bradshaw Index ; Proc Mixed used to generate LS Means and P-values.

Program Name: MUCUS-Shell17-V01-NC

Output Location: .\Output\Shared\MUCUS-TFLS-Final-27MAR24-V01.pdf

Table 14.2.11: Summary of Mean Change in SES-CD Score from Baseline at Week 26 and 52

|                                                | Naive<br>(N=13) | Biologic<br>(N=22) | Multiple Biologic<br>(N=17) |
|------------------------------------------------|-----------------|--------------------|-----------------------------|
| Simple Endoscopic Score for Crohns Disease     |                 |                    |                             |
| Baseline: OBS                                  |                 |                    |                             |
| N                                              | 12              | 21                 | 16                          |
| Missing                                        | 1               | 1                  | 1                           |
| Mean (SD)                                      | 9.4 (5.43)      | 8.5 (4.91)         | 14.4 (6.35)                 |
| Median (min, max)                              | 9.5 (3, 21)     | 7.0 (3, 20)        | 15.0 (5, 24)                |
| Week 26: OBS                                   |                 |                    |                             |
| N                                              | 1               | -                  | -                           |
| Missing                                        | 12              | -                  | -                           |
| Mean (SD)                                      | 3.0 (-)         | -                  | -                           |
| Median (min, max)                              | 3.0 (3, 3)      | -                  | -                           |
| Week 26: CHG                                   |                 |                    |                             |
| N                                              | 1               | -                  | -                           |
| Missing                                        | 12              | -                  | -                           |
| Mean (SD)                                      | -8.0 (-)        | -                  | -                           |
| Median (min, max)                              | -8.0 (-8, -8)   | -                  | -                           |
| LS Means (SE)                                  | -0.7 (3.07)     | -                  | -                           |
| LS Means Strata 1 vs (2 or 3) (95% CI) P-Value |                 | -                  | -                           |
| LS Means Strata 2 vs 3 (95% CI) P-Value        |                 |                    | -                           |
| Week 52: OBS                                   |                 |                    |                             |
| N                                              | 6               | 11                 | 9                           |
| Missing                                        | 7               | 11                 | 8                           |
| Mean (SD)                                      | 4.3 (5.89)      | 5.0 (3.61)         | 6.0 (7.89)                  |
| Median (min, max)                              | 1.5 (0, 14)     | 6.0 (0, 9)         | 3.0 (0, 24)                 |
| Week 52: CHG                                   |                 |                    |                             |
| N                                              | 6               | 11                 | 9                           |
| Missing                                        | 7               | 11                 | 8                           |
| Mean (SD)                                      | -3.5 (5.86)     | -4.6 (5.73)        | -10.2 (8.51)                |
| Median (min, max)                              | -3.0 (-11, 5)   | -3.0 (-14, 3)      | -11.0 (-23, 1)              |
| LS Means (SE)                                  | -3.5 (2.80)     | -4.6 (2.07)        | -10.2 (2.28)                |

Abbreviations: ITT, Intent-to-Treat Analysis set; N, number of randomized subjects; n, number of subjects within each category; SD, Standard Deviation; min, minimum; max, maximum; SE, Standard Error; SESCD, Simple Endoscopic Score for Crohns Disease; Proc Mixed used to generate LS Means and P-values.

Table 14.2.11: Summary of Mean Change in SES-CD Score from Baseline at Week 26 and 52

|                                                | Naive<br>(N=13) | Biologic<br>(N=22)    | Multiple Biologic<br>(N=17) |
|------------------------------------------------|-----------------|-----------------------|-----------------------------|
| LS Means Strata 1 vs (2 or 3) (95% CI) P-Value |                 | 1.1 (-6.1, 8.3) 0.747 | 6.7 (-0.7, 14.2) 0.075      |
| LS Means Strata 2 vs 3 (95% CI) P-Value        |                 |                       | 5.6 (-0.8, 12.0) 0.083      |

Abbreviations: ITT, Intent-to-Treat Analysis set; N, number of randomized subjects; n, number of subjects within each category; SD, Standard Deviation; min, minimum; max, maximum; SE, Standard Error; SES-CD, Simple Endoscopic Score for Crohns Disease; Proc Mixed used to generate LS Means and P-values.

Program Name: MUCUS-Shell7-V01-NC

Output Location: .\Output\Shared\MUCUS-TFLS-Final-27MAR24-V01.pdf

Table 14.2.12: Summary of Mean Change hs-CRP Concentration from Baseline at week 8, 16, 26, 36, 52

|                                                | Naive<br>(N=13) | Biologic<br>(N=22)      | Multiple Biologic<br>(N=17) |
|------------------------------------------------|-----------------|-------------------------|-----------------------------|
| C-Reactive Protein                             |                 |                         |                             |
| Baseline: OBS                                  |                 |                         |                             |
| N                                              | 13              | 22                      | 17                          |
| Missing                                        | 0               | 0                       | 0                           |
| Mean (SD)                                      | 18.1 (16.75)    | 19.8 (29.56)            | 35.3 (49.40)                |
| Median (min, max)                              | 12.6 (1, 52)    | 7.4 (1, 113)            | 25.9 (0, 210)               |
| Week 8: OBS                                    |                 |                         |                             |
| N                                              | 12              | 20                      | 14                          |
| Missing                                        | 1               | 2                       | 3                           |
| Mean (SD)                                      | 12.9 (18.55)    | 10.1 (12.24)            | 9.8 (9.56)                  |
| Median (min, max)                              | 6.6 (1, 67)     | 5.8 (1, 48)             | 4.6 (1, 31)                 |
| Week 8: CHG                                    |                 |                         |                             |
| N                                              | 12              | 20                      | 14                          |
| Missing                                        | 1               | 2                       | 3                           |
| Mean (SD)                                      | -5.6 (19.74)    | -11.2 (24.47)           | -28.9 (46.50)               |
| Median (min, max)                              | -1.5 (-47, 33)  | -1.4 (-76, 17)          | -15.7 (-180, 1)             |
| LS Means (SE)                                  | -5.6 (8.97)     | -10.4 (6.82)            | -28.9 (8.30)                |
| LS Means Strata 1 vs (2 or 3) (95% CI) P-Value |                 | 4.8 (-17.8, 27.4) 0.674 | 23.2 (-1.3, 47.8) 0.063     |
| LS Means Strata 2 vs 3 (95% CI) P-Value        |                 |                         | 18.5 (-3.1, 40.0) 0.092     |
| Week 16: OBS                                   |                 |                         |                             |
| N                                              | 8               | 18                      | 12                          |
| Missing                                        | 5               | 4                       | 5                           |
| Mean (SD)                                      | 7.2 (7.74)      | 8.5 (10.81)             | 16.6 (18.87)                |
| Median (min, max)                              | 5.0 (1, 21)     | 4.0 (1, 39)             | 6.6 (1, 58)                 |
| Week 16: CHG                                   |                 |                         |                             |
| N                                              | 8               | 18                      | 12                          |
| Missing                                        | 5               | 4                       | 5                           |
| Mean (SD)                                      | -4.7 (11.18)    | -14.6 (26.86)           | -25.6 (48.60)               |
| Median (min, max)                              | -1.0 (-26, 8)   | -2.6 (-81, 12)          | -7.2 (-165, 15)             |
| LS Means (SE)                                  | -7.5 (9.37)     | -12.5 (6.91)            | -23.3 (8.43)                |

Abbreviations: ITT, Intent-to-Treat Analysis set; N, number of randomized subjects; n, number of subjects within each category; SD, Standard Deviation; min, minimum; max, maximum; SE, Standard Error; hs-CRP, C-Reactive Protein ; Proc Mixed used to generate LS Means and P-values.

Program Name: MUCUS-Shell17-V01-NC

Output Location: .\Output\Shared\MUCUS-TFLS-Final-27MAR24-V01.pdf

Table 14.2.12: Summary of Mean Change hs-CRP Concentration from Baseline at week 8, 16, 26, 36, 52

|                                                | Naive<br>(N=13) | Biologic<br>(N=22)       | Multiple Biologic<br>(N=17) |
|------------------------------------------------|-----------------|--------------------------|-----------------------------|
| LS Means Strata 1 vs (2 or 3) (95% CI) P-Value |                 | 4.9 (-18.4, 28.2) 0.673  | 15.8 (-9.4, 41.1) 0.214     |
| LS Means Strata 2 vs 3 (95% CI) P-Value        |                 |                          | 10.9 (-11.0, 32.7) 0.322    |
| Week 26: OBS                                   |                 |                          |                             |
| N                                              | 6               | 10                       | 6                           |
| Missing                                        | 7               | 12                       | 11                          |
| Mean (SD)                                      | 1.8 (0.92)      | 24.0 (48.08)             | 8.6 (11.84)                 |
| Median (min, max)                              | 1.9 (1, 3)      | 4.4 (1, 156)             | 4.5 (1, 33)                 |
| Week 26: CHG                                   |                 |                          |                             |
| N                                              | 6               | 10                       | 6                           |
| Missing                                        | 7               | 12                       | 11                          |
| Mean (SD)                                      | -10.4 (19.22)   | 1.6 (18.13)              | -16.6 (23.54)               |
| Median (min, max)                              | -1.7 (-49, 1)   | -0.9 (-31, 43)           | -5.4 (-50, 7)               |
| LS Means (SE)                                  | -9.4 (9.76)     | 0.3 (7.46)               | -26.3 (9.26)                |
| LS Means Strata 1 vs (2 or 3) (95% CI) P-Value |                 | -9.8 (-34.3, 14.7) 0.429 | 16.9 (-9.9, 43.7) 0.213     |
| LS Means Strata 2 vs 3 (95% CI) P-Value        |                 |                          | 26.7 (3.0, 50.4) 0.028      |
| Week 36: OBS                                   |                 |                          |                             |
| N                                              | 8               | 9                        | 9                           |
| Missing                                        | 5               | 13                       | 8                           |
| Mean (SD)                                      | 8.5 (11.28)     | 7.5 (13.66)              | 9.3 (11.09)                 |
| Median (min, max)                              | 3.1 (1, 31)     | 4.0 (1, 44)              | 4.0 (1, 34)                 |
| Week 36: CHG                                   |                 |                          |                             |
| N                                              | 8               | 9                        | 9                           |
| Missing                                        | 5               | 13                       | 8                           |
| Mean (SD)                                      | -5.2 (6.45)     | -12.7 (23.94)            | -12.4 (19.92)               |
| Median (min, max)                              | -3.3 (-19, 1)   | -3.0 (-69, 3)            | -5.6 (-50, 8)               |
| LS Means (SE)                                  | -9.2 (9.39)     | -12.8 (7.58)             | -26.5 (8.73)                |
| LS Means Strata 1 vs (2 or 3) (95% CI) P-Value |                 | 3.6 (-20.5, 27.7) 0.765  | 17.3 (-8.3, 42.9) 0.182     |
| LS Means Strata 2 vs 3 (95% CI) P-Value        |                 |                          | 13.7 (-9.4, 36.7) 0.241     |
| Week 52: OBS                                   |                 |                          |                             |
| N                                              | 9               | 13                       | 10                          |

Abbreviations: ITT, Intent-to-Treat Analysis set; N, number of randomized subjects; n, number of subjects within each category; SD, Standard Deviation; min, minimum; max, maximum; SE, Standard Error; hs-CRP, C-Reactive Protein ; Proc Mixed used to generate LS Means and P-values.

Program Name: MUCUS-Shell17-V01-NC  
 Output Location: .\Output\Shared\MUCUS-TFLS-Final-27MAR24-V01.pdf

Table 14.2.12: Summary of Mean Change hs-CRP Concentration from Baseline at week 8, 16, 26, 36, 52

|                                                | Naive<br>(N=13) | Biologic<br>(N=22)      | Multiple Biologic<br>(N=17) |
|------------------------------------------------|-----------------|-------------------------|-----------------------------|
| Missing                                        | 4               | 9                       | 7                           |
| Mean (SD)                                      | 7.6 (7.98)      | 4.6 (5.04)              | 9.9 (9.96)                  |
| Median (min, max)                              | 5.4 (1, 21)     | 3.3 (1, 19)             | 4.1 (1, 28)                 |
| Week 52: CHG                                   |                 |                         |                             |
| N                                              | 9               | 13                      | 10                          |
| Missing                                        | 4               | 9                       | 7                           |
| Mean (SD)                                      | -14.9 (15.91)   | -21.5 (33.52)           | -21.5 (18.97)               |
| Median (min, max)                              | -6.1 (-42, -1)  | -3.0 (-94, 2)           | -22.7 (-50, 3)              |
| LS Means (SE)                                  | -11.3 (9.25)    | -16.0 (7.18)            | -28.0 (8.60)                |
| LS Means Strata 1 vs (2 or 3) (95% CI) P-Value |                 | 4.7 (-18.7, 28.1) 0.689 | 16.7 (-8.6, 42.0) 0.191     |
| LS Means Strata 2 vs 3 (95% CI) P-Value        |                 |                         | 12.0 (-10.4, 34.4) 0.288    |

Abbreviations: ITT, Intent-to-Treat Analysis set; N, number of randomized subjects; n, number of subjects within each category; SD, Standard Deviation; min, minimum; max, maximum; SE, Standard Error; hs-CRP, C-Reactive Protein ; Proc Mixed used to generate LS Means and P-values.

Program Name: MUCUS-Shell17-V01-NC

Output Location: .\Output\Shared\MUCUS-TFLS-Final-27MAR24-V01.pdf

Table 14.2.13: Summary of Mean Change Albumin Concentration from Baseline at week 8, 16, 26, 36, 52

|                                                | Naive<br>(N=13) | Biologic<br>(N=22)     | Multiple Biologic<br>(N=17) |
|------------------------------------------------|-----------------|------------------------|-----------------------------|
| Albumin                                        |                 |                        |                             |
| Baseline: OBS                                  |                 |                        |                             |
| N                                              | 11              | 22                     | 15                          |
| Missing                                        | 2               | 0                      | 2                           |
| Mean (SD)                                      | 39.0 (7.01)     | 34.9 (10.12)           | 35.1 (5.60)                 |
| Median (min, max)                              | 39.4 (23, 47)   | 37.9 (4, 49)           | 36.6 (21, 43)               |
| Week 8: OBS                                    |                 |                        |                             |
| N                                              | 12              | 17                     | 13                          |
| Missing                                        | 1               | 5                      | 4                           |
| Mean (SD)                                      | 40.1 (7.07)     | 39.4 (5.85)            | 39.2 (3.57)                 |
| Median (min, max)                              | 43.4 (24, 47)   | 39.6 (29, 51)          | 39.5 (31, 44)               |
| Week 8: CHG                                    |                 |                        |                             |
| N                                              | 10              | 17                     | 12                          |
| Missing                                        | 3               | 5                      | 5                           |
| Mean (SD)                                      | 1.7 (3.52)      | 5.9 (9.73)             | 4.4 (5.29)                  |
| Median (min, max)                              | 1.3 (-2, 9)     | 2.6 (-3, 39)           | 5.0 (-4, 17)                |
| LS Means (SE)                                  | 1.7 (2.28)      | 5.0 (1.60)             | 4.3 (2.01)                  |
| LS Means Strata 1 vs (2 or 3) (95% CI) P-Value |                 | -3.2 (-8.8, 2.4) 0.254 | -2.5 (-8.7, 3.6) 0.409      |
| LS Means Strata 2 vs 3 (95% CI) P-Value        |                 |                        | 0.7 (-4.5, 5.9) 0.790       |
| Week 16: OBS                                   |                 |                        |                             |
| N                                              | 8               | 16                     | 11                          |
| Missing                                        | 5               | 6                      | 6                           |
| Mean (SD)                                      | 39.3 (9.85)     | 40.2 (4.64)            | 37.8 (3.66)                 |
| Median (min, max)                              | 44.0 (21, 46)   | 41.2 (28, 45)          | 38.1 (31, 43)               |
| Week 16: CHG                                   |                 |                        |                             |
| N                                              | 7               | 16                     | 10                          |
| Missing                                        | 6               | 6                      | 7                           |
| Mean (SD)                                      | 0.3 (2.21)      | 4.6 (6.37)             | 3.7 (5.23)                  |
| Median (min, max)                              | -0.5 (-2, 3)    | 3.6 (-5, 20)           | 1.5 (-2, 14)                |
| LS Means (SE)                                  | 1.9 (2.34)      | 5.5 (1.61)             | 3.8 (2.04)                  |

Abbreviations: ITT, Intent-to-Treat Analysis set; N, number of randomized subjects; n, number of subjects within each category; SD, Standard Deviation; min, minimum; max, maximum; SE, Standard Error; Proc Mixed used to generate LS Means and P-values.



Table 14.2.13: Summary of Mean Change Albumin Concentration from Baseline at week 8, 16, 26, 36, 52

|                                                | Naive<br>(N=13) | Biologic<br>(N=22)      | Multiple Biologic<br>(N=17) |
|------------------------------------------------|-----------------|-------------------------|-----------------------------|
| LS Means Strata 1 vs (2 or 3) (95% CI) P-Value |                 | -3.6 (-9.3, 2.1) 0.208  | -1.9 (-8.1, 4.4) 0.546      |
| LS Means Strata 2 vs 3 (95% CI) P-Value        |                 |                         | 1.7 (-3.5, 7.0) 0.507       |
| Week 26: OBS                                   |                 |                         |                             |
| N                                              | 6               | 9                       | 6                           |
| Missing                                        | 7               | 13                      | 11                          |
| Mean (SD)                                      | 44.4 (3.22)     | 39.2 (7.33)             | 39.8 (6.08)                 |
| Median (min, max)                              | 44.7 (40, 49)   | 41.3 (23, 48)           | 39.5 (32, 49)               |
| Week 26: CHG                                   |                 |                         |                             |
| N                                              | 5               | 9                       | 5                           |
| Missing                                        | 8               | 13                      | 12                          |
| Mean (SD)                                      | 2.1 (3.23)      | 1.9 (3.69)              | 7.1 (5.26)                  |
| Median (min, max)                              | 1.0 (-1, 8)     | 1.1 (-4, 9)             | 5.4 (2, 16)                 |
| LS Means (SE)                                  | 3.0 (2.42)      | 4.2 (1.71)              | 6.0 (2.22)                  |
| LS Means Strata 1 vs (2 or 3) (95% CI) P-Value |                 | -1.2 (-7.1, 4.8) 0.691  | -2.9 (-9.5, 3.7) 0.378      |
| LS Means Strata 2 vs 3 (95% CI) P-Value        |                 |                         | -1.7 (-7.3, 3.9) 0.539      |
| Week 36: OBS                                   |                 |                         |                             |
| N                                              | 6               | 9                       | 7                           |
| Missing                                        | 7               | 13                      | 10                          |
| Mean (SD)                                      | 42.9 (4.38)     | 41.2 (6.74)             | 40.5 (3.80)                 |
| Median (min, max)                              | 43.8 (37, 47)   | 43.5 (27, 48)           | 39.3 (36, 46)               |
| Week 36: CHG                                   |                 |                         |                             |
| N                                              | 6               | 9                       | 6                           |
| Missing                                        | 7               | 13                      | 11                          |
| Mean (SD)                                      | 1.2 (1.73)      | 3.8 (4.20)              | 6.9 (3.59)                  |
| Median (min, max)                              | 1.0 (-1, 4)     | 3.4 (-1, 12)            | 6.0 (3, 13)                 |
| LS Means (SE)                                  | 1.2 (2.38)      | 5.9 (1.71)              | 6.5 (2.16)                  |
| LS Means Strata 1 vs (2 or 3) (95% CI) P-Value |                 | -4.7 (-10.6, 1.1) 0.111 | -5.3 (-11.7, 1.2) 0.106     |
| LS Means Strata 2 vs 3 (95% CI) P-Value        |                 |                         | -0.5 (-6.1, 5.0) 0.845      |
| Week 52: OBS                                   |                 |                         |                             |
| N                                              | 9               | 12                      | 7                           |

Abbreviations: ITT, Intent-to-Treat Analysis set; N, number of randomized subjects; n, number of subjects within each category; SD, Standard Deviation; min, minimum; max, maximum; SE, Standard Error; Proc Mixed used to generate LS Means and P-values.

Program Name: MUCUS-Shell17-V01-NC  
 Output Location: .\Output\Shared\MUCUS-TFLS-Final-27MAR24-V01.pdf

Table 14.2.13: Summary of Mean Change Albumin Concentration from Baseline at week 8, 16, 26, 36, 52

|                                                | Naive<br>(N=13) | Biologic<br>(N=22)     | Multiple Biologic<br>(N=17) |
|------------------------------------------------|-----------------|------------------------|-----------------------------|
| Missing                                        | 4               | 10                     | 10                          |
| Mean (SD)                                      | 45.1 (2.97)     | 42.6 (4.68)            | 41.8 (5.83)                 |
| Median (min, max)                              | 45.0 (39, 50)   | 43.4 (33, 49)          | 40.7 (33, 51)               |
| Week 52: CHG                                   |                 |                        |                             |
| N                                              | 7               | 12                     | 6                           |
| Missing                                        | 6               | 10                     | 11                          |
| Mean (SD)                                      | 4.9 (4.42)      | 9.7 (11.10)            | 7.1 (5.85)                  |
| Median (min, max)                              | 3.0 (0, 12)     | 5.5 (-0, 39)           | 6.0 (2, 17)                 |
| LS Means (SE)                                  | 3.9 (2.35)      | 7.3 (1.66)             | 6.8 (2.15)                  |
| LS Means Strata 1 vs (2 or 3) (95% CI) P-Value |                 | -3.4 (-9.2, 2.3) 0.236 | -2.9 (-9.3, 3.5) 0.365      |
| LS Means Strata 2 vs 3 (95% CI) P-Value        |                 |                        | 0.5 (-4.9, 6.0) 0.843       |

Abbreviations: ITT, Intent-to-Treat Analysis set; N, number of randomized subjects; n, number of subjects within each category; SD, Standard Deviation; min, minimum; max, maximum; SE, Standard Error; Proc Mixed used to generate LS Means and P-values.

Program Name: MUCUS-Shell17-V01-NC

Output Location: .\Output\Shared\MUCUS-TFLS-Final-27MAR24-V01.pdf

Table 14.2.14: Summary of Mean Change Fecal Calprotectin Concentration from Baseline at week 8, 16, 26, 36, 52

|                                                | Naive<br>(N=13)    | Biologic<br>(N=22)          | Multiple Biologic<br>(N=17)  |
|------------------------------------------------|--------------------|-----------------------------|------------------------------|
| <b>Fecal Calprotectin</b>                      |                    |                             |                              |
| <b>Baseline: OBS</b>                           |                    |                             |                              |
| N                                              | 12                 | 20                          | 15                           |
| Missing                                        | 1                  | 2                           | 2                            |
| Mean (SD)                                      | 648.0 (791.44)     | 875.3 (954.21)              | 1170.5 (986.69)              |
| Median (min, max)                              | 247.0 (50, 2000)   | 584.5 (5, 4030)             | 800.0 (15, 3000)             |
| <b>Week 8: OBS</b>                             |                    |                             |                              |
| N                                              | 10                 | 13                          | 12                           |
| Missing                                        | 3                  | 9                           | 5                            |
| Mean (SD)                                      | 226.8 (231.68)     | 382.9 (529.73)              | 773.4 (851.40)               |
| Median (min, max)                              | 177.5 (35, 804)    | 154.0 (50, 2000)            | 406.0 (28, 2100)             |
| <b>Week 8: CHG</b>                             |                    |                             |                              |
| N                                              | 10                 | 13                          | 11                           |
| Missing                                        | 3                  | 9                           | 6                            |
| Mean (SD)                                      | -343.1 (654.65)    | -457.8 (1163.07)            | -288.3 (493.39)              |
| Median (min, max)                              | -75.3 (-1783, 305) | -127.0 (-3797, 562)         | -22.0 (-1440, 286)           |
| LS Means (SE)                                  | -340.7 (257.78)    | -503.8 (213.14)             | -299.3 (246.75)              |
| LS Means Strata 1 vs (2 or 3) (95% CI) P-Value |                    | 163.1 (-509.2, 835.4) 0.628 | -41.4 (-759.3, 676.6) 0.908  |
| LS Means Strata 2 vs 3 (95% CI) P-Value        |                    |                             | -204.5 (-859.8, 450.9) 0.534 |
| <b>Week 16: OBS</b>                            |                    |                             |                              |
| N                                              | 7                  | 13                          | 10                           |
| Missing                                        | 6                  | 9                           | 7                            |
| Mean (SD)                                      | 235.3 (216.03)     | 345.1 (533.37)              | 858.7 (727.58)               |
| Median (min, max)                              | 162.0 (74, 650)    | 206.0 (50, 2000)            | 723.7 (50, 2000)             |
| <b>Week 16: CHG</b>                            |                    |                             |                              |
| N                                              | 7                  | 13                          | 8                            |
| Missing                                        | 6                  | 9                           | 9                            |
| Mean (SD)                                      | 12.8 (177.21)      | -540.0 (1273.02)            | -403.1 (587.14)              |
| Median (min, max)                              | -7.0 (-182, 355)   | -225.0 (-3824, 1795)        | -50.0 (-1264, 119)           |
| LS Means (SE)                                  | -181.8 (271.06)    | -516.9 (213.91)             | -557.7 (258.00)              |

Abbreviations: ITT, Intent-to-Treat Analysis set; N, number of randomized subjects; n, number of subjects within each category; SD, Standard Deviation; min, minimum; max, maximum; SE, Standard Error; Proc Mixed used to generate LS Means and P-values.

Table 14.2.14: Summary of Mean Change Fecal Calprotectin Concentration from Baseline at week 8, 16, 26, 36, 52

|                                                | Naive<br>(N=13)     | Biologic<br>(N=22)          | Multiple Biologic<br>(N=17) |
|------------------------------------------------|---------------------|-----------------------------|-----------------------------|
| LS Means Strata 1 vs (2 or 3) (95% CI) P-Value |                     | 335.1 (-357.2, 1027.4) 0.33 | 376.0 (-374.0, 1125.9) 0.31 |
| LS Means Strata 2 vs 3 (95% CI) P-Value        |                     |                             | 40.8 (-631.3, 713.0) 0.903  |
| Week 26: OBS                                   |                     |                             |                             |
| N                                              | 5                   | 7                           | 6                           |
| Missing                                        | 8                   | 15                          | 11                          |
| Mean (SD)                                      | 97.8 (69.53)        | 163.1 (90.43)               | 605.8 (667.57)              |
| Median (min, max)                              | 80.9 (20, 186)      | 185.0 (63, 298)             | 489.5 (50, 1800)            |
| Week 26: CHG                                   |                     |                             |                             |
| N                                              | 5                   | 7                           | 5                           |
| Missing                                        | 8                   | 15                          | 12                          |
| Mean (SD)                                      | -116.0 (113.73)     | -513.8 (585.30)             | -164.2 (313.89)             |
| Median (min, max)                              | -125.0 (-269, 50)   | -459.0 (-1398, 293)         | -44.0 (-724, 0)             |
| LS Means (SE)                                  | -240.7 (287.47)     | -538.6 (238.99)             | -264.5 (280.95)             |
| LS Means Strata 1 vs (2 or 3) (95% CI) P-Value |                     | 297.9 (-448.1, 1043.9) 0.42 | 23.8 (-778.3, 826.0) 0.953  |
| LS Means Strata 2 vs 3 (95% CI) P-Value        |                     |                             | -274.1 (-1009.7, 461.5) 0.4 |
| Week 36: OBS                                   |                     |                             |                             |
| N                                              | 6                   | 8                           | 6                           |
| Missing                                        | 7                   | 14                          | 11                          |
| Mean (SD)                                      | 153.0 (147.79)      | 347.4 (592.43)              | 451.9 (493.80)              |
| Median (min, max)                              | 67.0 (50, 367)      | 166.0 (50, 1800)            | 268.0 (50, 1292)            |
| Week 36: CHG                                   |                     |                             |                             |
| N                                              | 6                   | 8                           | 5                           |
| Missing                                        | 7                   | 14                          | 12                          |
| Mean (SD)                                      | -321.0 (689.78)     | -690.0 (1366.23)            | -459.6 (617.16)             |
| Median (min, max)                              | -156.0 (-1663, 317) | -412.0 (-3760, 810)         | -507.8 (-1317, 251)         |
| LS Means (SE)                                  | -375.6 (277.83)     | -501.9 (231.82)             | -387.2 (280.38)             |
| LS Means Strata 1 vs (2 or 3) (95% CI) P-Value |                     | 126.3 (-596.9, 849.6) 0.728 | 11.6 (-776.8, 800.0) 0.977  |
| LS Means Strata 2 vs 3 (95% CI) P-Value        |                     |                             | -114.7 (-840.7, 611.3) 0.75 |
| Week 52: OBS                                   |                     |                             |                             |
| N                                              | 6                   | 6                           | 8                           |

Abbreviations: ITT, Intent-to-Treat Analysis set; N, number of randomized subjects; n, number of subjects within each category; SD, Standard Deviation; min, minimum; max, maximum; SE, Standard Error; Proc Mixed used to generate LS Means and P-values.

Program Name: MUCUS-Shell17-V01-NC

Output Location: .\Output\Shared\MUCUS-TFLS-Final-27MAR24-V01.pdf

Table 14.2.14: Summary of Mean Change Fecal Calprotectin Concentration from Baseline at week 8, 16, 26, 36, 52

|                                                | Naive<br>(N=13)    | Biologic<br>(N=22)         | Multiple Biologic<br>(N=17)   |
|------------------------------------------------|--------------------|----------------------------|-------------------------------|
| Missing                                        | 7                  | 16                         | 9                             |
| Mean (SD)                                      | 676.7 (773.45)     | 375.5 (598.72)             | 826.3 (789.84)                |
| Median (min, max)                              | 369.5 (50, 2000)   | 159.5 (5, 1584)            | 654.3 (14, 2000)              |
| Week 52: CHG                                   |                    |                            |                               |
| N                                              | 6                  | 5                          | 7                             |
| Missing                                        | 7                  | 17                         | 10                            |
| Mean (SD)                                      | -194.3 (463.97)    | -1278.2 (1510.93)          | -308.1 (930.44)               |
| Median (min, max)                              | -172.0 (-829, 521) | -674.0 (-3837, 77)         | -100.0 (-1724, 917)           |
| LS Means (SE)                                  | -16.3 (277.99)     | -866.0 (255.08)            | -250.3 (263.71)               |
| LS Means Strata 1 vs (2 or 3) (95% CI) P-Value |                    | 849.7 (97.2, 1602.2) 0.027 | 234.1 (-532.6, 1000.7) 0.544  |
| LS Means Strata 2 vs 3 (95% CI) P-Value        |                    |                            | -615.6 (-1347.5, 116.2) 0.098 |

Abbreviations: ITT, Intent-to-Treat Analysis set; N, number of randomized subjects; n, number of subjects within each category; SD, Standard Deviation; min, minimum; max, maximum; SE, Standard Error; Proc Mixed used to generate LS Means and P-values.

Program Name: MUCUS-Shell17-V01-NC  
 Output Location: .\Output\Shared\MUCUS-TFLS-Final-27MAR24-V01.pdf

Table 14.2.15: Summary of Mean Change in EQ-5D-5L from Baseline at Weeks 8, 16, 26, 36, 52

|                                                | Naive<br>(N=13) | Biologic<br>(N=22)     | Multiple Biologic<br>(N=17) |
|------------------------------------------------|-----------------|------------------------|-----------------------------|
| EuroQoL-5D-5L Health Questionnaire             |                 |                        |                             |
| Baseline: OBS                                  |                 |                        |                             |
| N                                              | 12              | 21                     | 15                          |
| Missing                                        | 1               | 1                      | 2                           |
| Mean (SD)                                      | 0.7 (0.30)      | 0.7 (0.25)             | 0.7 (0.39)                  |
| Median (min, max)                              | 0.8 (0, 1)      | 0.8 (0, 1)             | 0.7 (-1, 1)                 |
| Week 8: OBS                                    |                 |                        |                             |
| N                                              | 12              | 21                     | 12                          |
| Missing                                        | 1               | 1                      | 5                           |
| Mean (SD)                                      | 0.8 (0.13)      | 0.8 (0.18)             | 0.9 (0.10)                  |
| Median (min, max)                              | 0.8 (1, 1)      | 0.8 (0, 1)             | 0.9 (1, 1)                  |
| Week 8: CHG                                    |                 |                        |                             |
| N                                              | 11              | 20                     | 11                          |
| Missing                                        | 2               | 2                      | 6                           |
| Mean (SD)                                      | 0.1 (0.17)      | 0.1 (0.32)             | 0.2 (0.42)                  |
| Median (min, max)                              | 0.1 (-0, 0)     | 0.0 (-1, 1)            | 0.1 (-0, 1)                 |
| LS Means (SE)                                  | 0.1 (0.09)      | 0.1 (0.07)             | 0.2 (0.09)                  |
| LS Means Strata 1 vs (2 or 3) (95% CI) P-Value |                 | -0.1 (-0.3, 0.2) 0.632 | -0.1 (-0.4, 0.2) 0.405      |
| LS Means Strata 2 vs 3 (95% CI) P-Value        |                 |                        | -0.1 (-0.3, 0.2) 0.644      |
| Week 16: OBS                                   |                 |                        |                             |
| N                                              | 9               | 19                     | 12                          |
| Missing                                        | 4               | 3                      | 5                           |
| Mean (SD)                                      | 0.9 (0.09)      | 0.7 (0.35)             | 0.9 (0.11)                  |
| Median (min, max)                              | 0.9 (1, 1)      | 0.8 (-0, 1)            | 0.9 (1, 1)                  |
| Week 16: CHG                                   |                 |                        |                             |
| N                                              | 9               | 18                     | 11                          |
| Missing                                        | 4               | 4                      | 6                           |
| Mean (SD)                                      | 0.1 (0.13)      | 0.0 (0.40)             | 0.2 (0.43)                  |
| Median (min, max)                              | 0.1 (-0, 0)     | 0.0 (-1, 1)            | 0.1 (-0, 1)                 |
| LS Means (SE)                                  | 0.1 (0.10)      | 0.0 (0.07)             | 0.2 (0.09)                  |

Abbreviations: ITT, Intent-to-Treat Analysis set; N, number of randomized subjects; n, number of subjects within each category; SD, Standard Deviation; min, minimum; max, maximum; SE, Standard Error; EQ-5D-5L, EuroQoL-5D-5L Health Questionnaire; Proc Mixed used to generate LS Means and P-values.

Table 14.2.15: Summary of Mean Change in EQ-5D-5L from Baseline at Weeks 8, 16, 26, 36, 52

|                                                | Naive<br>(N=13) | Biologic<br>(N=22)    | Multiple Biologic<br>(N=17) |
|------------------------------------------------|-----------------|-----------------------|-----------------------------|
| LS Means Strata 1 vs (2 or 3) (95% CI) P-Value |                 | 0.1 (-0.1, 0.3) 0.407 | -0.1 (-0.3, 0.2) 0.594      |
| LS Means Strata 2 vs 3 (95% CI) P-Value        |                 |                       | -0.2 (-0.4, 0.1) 0.139      |
| Week 26: OBS                                   |                 |                       |                             |
| N                                              | 7               | 13                    | 6                           |
| Missing                                        | 6               | 9                     | 11                          |
| Mean (SD)                                      | 0.9 (0.10)      | 0.7 (0.32)            | 0.9 (0.10)                  |
| Median (min, max)                              | 0.9 (1, 1)      | 0.8 (-0, 1)           | 1.0 (1, 1)                  |
| Week 26: CHG                                   |                 |                       |                             |
| N                                              | 6               | 12                    | 6                           |
| Missing                                        | 7               | 10                    | 11                          |
| Mean (SD)                                      | 0.1 (0.07)      | -0.0 (0.41)           | 0.1 (0.20)                  |
| Median (min, max)                              | 0.1 (-0, 0)     | -0.0 (-1, 1)          | 0.1 (0, 1)                  |
| LS Means (SE)                                  | 0.1 (0.10)      | 0.0 (0.08)            | 0.1 (0.10)                  |
| LS Means Strata 1 vs (2 or 3) (95% CI) P-Value |                 | 0.1 (-0.1, 0.4) 0.383 | -0.0 (-0.3, 0.3) 0.811      |
| LS Means Strata 2 vs 3 (95% CI) P-Value        |                 |                       | -0.1 (-0.4, 0.1) 0.242      |
| Week 36: OBS                                   |                 |                       |                             |
| N                                              | 7               | 10                    | 9                           |
| Missing                                        | 6               | 12                    | 8                           |
| Mean (SD)                                      | 0.9 (0.13)      | 0.8 (0.22)            | 1.0 (0.05)                  |
| Median (min, max)                              | 0.9 (1, 1)      | 0.8 (0, 1)            | 1.0 (1, 1)                  |
| Week 36: CHG                                   |                 |                       |                             |
| N                                              | 7               | 10                    | 9                           |
| Missing                                        | 6               | 12                    | 8                           |
| Mean (SD)                                      | 0.1 (0.13)      | 0.1 (0.28)            | 0.1 (0.18)                  |
| Median (min, max)                              | 0.1 (-0, 0)     | 0.1 (-0, 1)           | 0.1 (-0, 1)                 |
| LS Means (SE)                                  | 0.1 (0.10)      | 0.1 (0.08)            | 0.2 (0.09)                  |
| LS Means Strata 1 vs (2 or 3) (95% CI) P-Value |                 | 0.0 (-0.2, 0.3) 0.941 | -0.1 (-0.3, 0.2) 0.689      |
| LS Means Strata 2 vs 3 (95% CI) P-Value        |                 |                       | -0.1 (-0.3, 0.2) 0.596      |
| Week 52: OBS                                   |                 |                       |                             |
| N                                              | 9               | 16                    | 12                          |

Abbreviations: ITT, Intent-to-Treat Analysis set; N, number of randomized subjects; n, number of subjects within each category; SD, Standard Deviation; min, minimum; max, maximum; SE, Standard Error; EQ-5D-5L, EuroQoL-5D-5L Health Questionnaire; Proc Mixed used to generate LS Means and P-values.

Table 14.2.15: Summary of Mean Change in EQ-5D-5L from Baseline at Weeks 8, 16, 26, 36, 52

|                                                | Naive<br>(N=13) | Biologic<br>(N=22)    | Multiple Biologic<br>(N=17) |
|------------------------------------------------|-----------------|-----------------------|-----------------------------|
| Missing                                        | 4               | 6                     | 5                           |
| Mean (SD)                                      | 0.9 (0.12)      | 0.8 (0.30)            | 0.8 (0.21)                  |
| Median (min, max)                              | 1.0 (1, 1)      | 0.8 (-0, 1)           | 0.9 (0, 1)                  |
| Week 52: CHG                                   |                 |                       |                             |
| N                                              | 8               | 16                    | 11                          |
| Missing                                        | 5               | 6                     | 6                           |
| Mean (SD)                                      | 0.1 (0.16)      | 0.1 (0.31)            | 0.2 (0.30)                  |
| Median (min, max)                              | 0.1 (-0, 0)     | 0.0 (-0, 1)           | 0.1 (-0, 1)                 |
| LS Means (SE)                                  | 0.1 (0.10)      | 0.1 (0.07)            | 0.2 (0.09)                  |
| LS Means Strata 1 vs (2 or 3) (95% CI) P-Value |                 | 0.1 (-0.2, 0.3) 0.509 | -0.0 (-0.3, 0.2) 0.805      |
| LS Means Strata 2 vs 3 (95% CI) P-Value        |                 |                       | -0.1 (-0.3, 0.1) 0.321      |

Abbreviations: ITT, Intent-to-Treat Analysis set; N, number of randomized subjects; n, number of subjects within each category; SD, Standard Deviation; min, minimum; max, maximum; SE, Standard Error; EQ-5D-5L, EuroQoL-5D-5L Health Questionnaire; Proc Mixed used to generate LS Means and P-values.

Program Name: MUCUS-Shell17-V01-NC  
 Output Location: .\Output\Shared\MUCUS-TFLS-Final-27MAR24-V01.pdf



Table 14.2.16: Summary of Mean Change in PRO-2 from Baseline at Weeks 8, 16, 26, 36, 52

|                                                | Naive<br>(N=13)  | Biologic<br>(N=22)      | Multiple Biologic<br>(N=17) |
|------------------------------------------------|------------------|-------------------------|-----------------------------|
| Patient Reported Outcomes-2                    |                  |                         |                             |
| Baseline: OBS                                  |                  |                         |                             |
| N                                              | 11               | 22                      | 13                          |
| Missing                                        | 2                | 0                       | 4                           |
| Mean (SD)                                      | 89.3 (74.56)     | 113.5 (53.01)           | 135.6 (140.49)              |
| Median (min, max)                              | 67.0 (2, 278)    | 110.0 (21, 203)         | 76.0 (0, 520)               |
| Week 8: OBS                                    |                  |                         |                             |
| N                                              | 11               | 21                      | 12                          |
| Missing                                        | 2                | 1                       | 5                           |
| Mean (SD)                                      | 51.1 (40.27)     | 73.1 (64.48)            | 37.0 (38.97)                |
| Median (min, max)                              | 43.0 (0, 141)    | 56.0 (4, 202)           | 17.5 (2, 142)               |
| Week 8: CHG                                    |                  |                         |                             |
| N                                              | 10               | 21                      | 10                          |
| Missing                                        | 3                | 1                       | 7                           |
| Mean (SD)                                      | -35.8 (40.38)    | -42.4 (71.15)           | -90.8 (160.38)              |
| Median (min, max)                              | -24.0 (-137, -2) | -33.0 (-187, 130)       | -34.5 (-505, 14)            |
| LS Means (SE)                                  | -35.2 (29.20)    | -42.4 (20.99)           | -82.3 (29.25)               |
| LS Means Strata 1 vs (2 or 3) (95% CI) P-Value |                  | 7.2 (-65.2, 79.6) 0.842 | 47.1 (-36.0, 130.3) 0.260   |
| LS Means Strata 2 vs 3 (95% CI) P-Value        |                  |                         | 39.9 (-32.6, 112.3) 0.274   |
| Week 16: OBS                                   |                  |                         |                             |
| N                                              | 9                | 19                      | 12                          |
| Missing                                        | 4                | 3                       | 5                           |
| Mean (SD)                                      | 55.6 (61.53)     | 71.7 (57.26)            | 42.8 (40.56)                |
| Median (min, max)                              | 35.0 (0, 206)    | 70.0 (0, 173)           | 27.0 (4, 148)               |
| Week 16: CHG                                   |                  |                         |                             |
| N                                              | 9                | 19                      | 10                          |
| Missing                                        | 4                | 3                       | 7                           |
| Mean (SD)                                      | -38.6 (29.36)    | -47.9 (79.18)           | -85.9 (163.44)              |
| Median (min, max)                              | -34.0 (-72, 11)  | -59.0 (-199, 85)        | -8.0 (-495, 17)             |
| LS Means (SE)                                  | -33.7 (29.43)    | -36.1 (21.15)           | -77.4 (29.25)               |

Abbreviations: ITT, Intent-to-Treat Analysis set; N, number of randomized subjects; n, number of subjects within each category; SD, Standard Deviation; min, minimum; max, maximum; SE, Standard Error; PRO-2, Patient Reported Outcomes-2; Proc Mixed used to generate LS Means and P-values.

Table 14.2.16: Summary of Mean Change in PRO-2 from Baseline at Weeks 8, 16, 26, 36, 52

|                                                | Naive<br>(N=13)  | Biologic<br>(N=22)         | Multiple Biologic<br>(N=17) |
|------------------------------------------------|------------------|----------------------------|-----------------------------|
| LS Means Strata 1 vs (2 or 3) (95% CI) P-Value |                  | 2.3 (-70.5, 75.2) 0.949    | 43.7 (-39.8, 127.1) 0.298   |
| LS Means Strata 2 vs 3 (95% CI) P-Value        |                  |                            | 41.3 (-31.3, 113.9) 0.258   |
| Week 26: OBS                                   |                  |                            |                             |
| N                                              | 7                | 13                         | 7                           |
| Missing                                        | 6                | 9                          | 10                          |
| Mean (SD)                                      | 38.4 (46.28)     | 86.2 (62.92)               | 28.7 (18.38)                |
| Median (min, max)                              | 18.0 (4, 135)    | 84.0 (0, 204)              | 28.0 (0, 55)                |
| Week 26: CHG                                   |                  |                            |                             |
| N                                              | 6                | 13                         | 6                           |
| Missing                                        | 7                | 9                          | 11                          |
| Mean (SD)                                      | -58.8 (51.45)    | -38.5 (77.71)              | -93.8 (183.10)              |
| Median (min, max)                              | -49.5 (-143, -6) | -43.0 (-167, 70)           | -24.5 (-465, 2)             |
| LS Means (SE)                                  | -56.9 (30.46)    | -19.3 (21.78)              | -76.2 (30.45)               |
| LS Means Strata 1 vs (2 or 3) (95% CI) P-Value |                  | -37.5 (-112.6, 37.5) 0.321 | 19.4 (-67.0, 105.7) 0.655   |
| LS Means Strata 2 vs 3 (95% CI) P-Value        |                  |                            | 56.9 (-18.2, 132.0) 0.134   |
| Week 36: OBS                                   |                  |                            |                             |
| N                                              | 7                | 10                         | 9                           |
| Missing                                        | 6                | 12                         | 8                           |
| Mean (SD)                                      | 47.9 (62.65)     | 55.2 (31.44)               | 30.4 (25.08)                |
| Median (min, max)                              | 25.0 (6, 184)    | 47.0 (25, 119)             | 34.0 (0, 69)                |
| Week 36: CHG                                   |                  |                            |                             |
| N                                              | 7                | 10                         | 8                           |
| Missing                                        | 6                | 12                         | 9                           |
| Mean (SD)                                      | -59.2 (30.81)    | -68.0 (67.32)              | -76.4 (175.30)              |
| Median (min, max)                              | -65.0 (-96, -18) | -71.0 (-172, 10)           | -13.5 (-505, 19)            |
| LS Means (SE)                                  | -58.5 (30.06)    | -52.0 (22.33)              | -82.8 (29.72)               |
| LS Means Strata 1 vs (2 or 3) (95% CI) P-Value |                  | -6.4 (-81.5, 68.7) 0.865   | 24.3 (-60.6, 109.2) 0.568   |
| LS Means Strata 2 vs 3 (95% CI) P-Value        |                  |                            | 30.7 (-43.9, 105.3) 0.412   |
| Week 52: OBS                                   |                  |                            |                             |
| N                                              | 9                | 16                         | 12                          |

Abbreviations: ITT, Intent-to-Treat Analysis set; N, number of randomized subjects; n, number of subjects within each category; SD, Standard Deviation; min, minimum; max, maximum; SE, Standard Error; PRO-2, Patient Reported Outcomes-2; Proc Mixed used to generate LS Means and P-values.

Program Name: MUCUS-Shell17-V01-NC  
 Output Location: .\Output\Shared\MUCUS-TFLS-Final-27MAR24-V01.pdf

Table 14.2.16: Summary of Mean Change in PRO-2 from Baseline at Weeks 8, 16, 26, 36, 52

|                                                | Naive<br>(N=13)  | Biologic<br>(N=22)      | Multiple Biologic<br>(N=17) |
|------------------------------------------------|------------------|-------------------------|-----------------------------|
| Missing                                        | 4                | 6                       | 5                           |
| Mean (SD)                                      | 43.5 (76.58)     | 59.1 (49.78)            | 51.6 (57.61)                |
| Median (min, max)                              | 10.0 (0, 225)    | 49.5 (0, 173)           | 36.5 (0, 176)               |
| Week 52: CHG                                   |                  |                         |                             |
| N                                              | 8                | 16                      | 10                          |
| Missing                                        | 5                | 6                       | 7                           |
| Mean (SD)                                      | -52.8 (36.28)    | -55.2 (67.40)           | -81.6 (161.95)              |
| Median (min, max)                              | -49.0 (-103, -2) | -28.5 (-203, 27)        | -18.0 (-493, 19)            |
| LS Means (SE)                                  | -49.1 (29.69)    | -49.9 (21.41)           | -79.7 (29.17)               |
| LS Means Strata 1 vs (2 or 3) (95% CI) P-Value |                  | 0.8 (-72.7, 74.3) 0.983 | 30.6 (-53.1, 114.2) 0.466   |
| LS Means Strata 2 vs 3 (95% CI) P-Value        |                  |                         | 29.8 (-43.0, 102.5) 0.415   |

Abbreviations: ITT, Intent-to-Treat Analysis set; N, number of randomized subjects; n, number of subjects within each category; SD, Standard Deviation; min, minimum; max, maximum; SE, Standard Error; PRO-2, Patient Reported Outcomes-2; Proc Mixed used to generate LS Means and P-values.

Program Name: MUCUS-Shell17-V01-NC

Output Location: .\Output\Shared\MUCUS-TFLS-Final-27MAR24-V01.pdf

Table 14.2.17: Summary of PRO-2 Remission at Weeks 0, 8, 16, 26, 36, 52

|                  | Naive<br>(N=13) | Biologic<br>(N=22) | Multiple Biologic<br>(N=17) |
|------------------|-----------------|--------------------|-----------------------------|
| PRO-2            |                 |                    |                             |
| Baseline: OBS    |                 |                    |                             |
| Remission (<8)   | 1 (7.7%)        | -                  | 1 (5.9%)                    |
| Mild (8-13)      | -               | -                  | -                           |
| Moderate (14-34) | 1 (7.7%)        | 1 (4.5%)           | 1 (5.9%)                    |
| Severe (>=35)    | 9 (69.2%)       | 21 (95.5%)         | 11 (64.7%)                  |
| Week 8: OBS      |                 |                    |                             |
| Remission (<8)   | 1 (7.7%)        | 1 (4.5%)           | 2 (11.8%)                   |
| Mild (8-13)      | 1 (7.7%)        | 2 (9.1%)           | -                           |
| Moderate (14-34) | 2 (15.4%)       | 6 (27.3%)          | 5 (29.4%)                   |
| Severe (>=35)    | 7 (53.8%)       | 12 (54.5%)         | 5 (29.4%)                   |
| Week 16: OBS     |                 |                    |                             |
| Remission (<8)   | 1 (7.7%)        | 5 (22.7%)          | 1 (5.9%)                    |
| Mild (8-13)      | -               | -                  | 1 (5.9%)                    |
| Moderate (14-34) | 3 (23.1%)       | -                  | 6 (35.3%)                   |
| Severe (>=35)    | 5 (38.5%)       | 14 (63.6%)         | 4 (23.5%)                   |
| Week 26: OBS     |                 |                    |                             |
| Remission (<8)   | 2 (15.4%)       | 1 (4.5%)           | 1 (5.9%)                    |
| Mild (8-13)      | -               | -                  | -                           |
| Moderate (14-34) | 3 (23.1%)       | 1 (4.5%)           | 4 (23.5%)                   |
| Severe (>=35)    | 2 (15.4%)       | 11 (50.0%)         | 2 (11.8%)                   |
| Week 36: OBS     |                 |                    |                             |
| Remission (<8)   | 1 (7.7%)        | -                  | 2 (11.8%)                   |
| Mild (8-13)      | 1 (7.7%)        | -                  | 1 (5.9%)                    |
| Moderate (14-34) | 3 (23.1%)       | 4 (18.2%)          | 2 (11.8%)                   |
| Severe (>=35)    | 2 (15.4%)       | 6 (27.3%)          | 4 (23.5%)                   |

Abbreviations: ITT, Intent-to-Treat Analysis set; N, number of randomized subjects; n, number of subjects within each category; SD, Standard Deviation; min, minimum; max, maximum; SE, Standard Error; PRO-2, Patient Reported Outcomes-2; Proc Mixed used to generate LS Means and P-values.

Program Name: MUCUS-Shell18-V01  
 Output Location: .\Output\Shared\MUCUS-TFLS-Final-27MAR24-V01.pdf

Table 14.2.17: Summary of PRO-2 Remission at Weeks 0, 8, 16, 26, 36, 52

|                  | Naive<br>(N=13) | Biologic<br>(N=22) | Multiple Biologic<br>(N=17) |
|------------------|-----------------|--------------------|-----------------------------|
| Week 52: OBS     |                 |                    |                             |
| Remission (<8)   | 4 (30.8%)       | 3 (13.6%)          | 3 (17.6%)                   |
| Mild (8-13)      | 1 (7.7%)        | 1 (4.5%)           | -                           |
| Moderate (14-34) | 2 (15.4%)       | 2 (9.1%)           | 2 (11.8%)                   |
| Severe (>=35)    | 2 (15.4%)       | 10 (45.5%)         | 7 (41.2%)                   |

Abbreviations: ITT, Intent-to-Treat Analysis set; N, number of randomized subjects; n, number of subjects within each category; SD, Standard Deviation; min, minimum; max, maximum; SE, Standard Error; PRO-2, Patient Reported Outcomes-2; Proc Mixed used to generate LS Means and P-values.

Program Name: MUCUS-Shell18-V01

Output Location: .\Output\Shared\MUCUS-TFLS-Final-27MAR24-V01.pdf

## Listing 14.3.1.1: Overall Summary of AEs

|                                                                  | Naive<br>(N=13) | Biologic<br>(N=22) | Multiple Biologic<br>(N=17) |
|------------------------------------------------------------------|-----------------|--------------------|-----------------------------|
| Total Number of AEs                                              | 55              | 46                 | 48                          |
| Total Number of TEAEs                                            | 51              | 45                 | 43                          |
| Subjects with >= 1 TEAE                                          | 11 (84.6%)      | 14 (63.6%)         | 11 (64.7%)                  |
| Subjects with an TEAE Leading to Study Drug Discontinuation      | 2 (15.4%)       | 2 (9.1%)           | 1 (5.9%)                    |
| Total Number of Serious TEAEs                                    | 5               | 11                 | 2                           |
| Subjects with >= 1 Serious TEAE                                  | 3 (23.1%)       | 6 (27.3%)          | 2 (11.8%)                   |
| Subjects with Serious TEAE Leading to Study Drug Discontinuation | 2 (15.4%)       | 1 (4.5%)           | 1 (5.9%)                    |
| Number of Subjects with >=1 TEAE by Maximum Treatment Relation   |                 |                    |                             |
| Not Related                                                      | 5 (38.5%)       | 8 (36.4%)          | 5 (29.4%)                   |
| Unlikely                                                         | 1 (7.7%)        | -                  | 1 (5.9%)                    |
| Possible                                                         | 2 (15.4%)       | 4 (18.2%)          | 5 (29.4%)                   |
| Probable                                                         | 1 (7.7%)        | -                  | -                           |
| Definite                                                         | 2 (15.4%)       | 2 (9.1%)           | -                           |
| Number of Subjects with >=1 TEAE by Maximum Severity             |                 |                    |                             |
| Mild                                                             | 3 (23.1%)       | 2 (9.1%)           | 2 (11.8%)                   |
| Moderate                                                         | 5 (38.5%)       | 9 (40.9%)          | 7 (41.2%)                   |
| Severe                                                           | 3 (23.1%)       | 3 (13.6%)          | 2 (11.8%)                   |
| Very Severe                                                      | -               | -                  | -                           |
| Death                                                            | -               | -                  | -                           |

Abbreviations: N, number of randomized subjects; n, number of subjects within each category; TEAE, Treatment Emergent Adverse Events.

Program Name: MUCUS-Shell110-V01

Output Location: .\Output\Shared\MUCUS-TFLS-Final-27MAR24-V01.pdf

Table 14.3.1.2: Summary of TEAEs by SOC and PT

|                                                      | Naive<br>(N=13) | Biologic<br>(N=22) | Multiple Biologic<br>(N=17) |
|------------------------------------------------------|-----------------|--------------------|-----------------------------|
| Subjects with >= 1 TEAE                              | 11 (84.6%)      | 14 (63.6%)         | 11 (64.7%)                  |
| Blood and lymphatic system disorders                 | -               | 1 (4.5%)           | 1 (5.9%)                    |
| Anaemia                                              | -               | 1 (4.5%)           | -                           |
| Iron deficiency anaemia                              | -               | 1 (4.5%)           | 1 (5.9%)                    |
| Endocrine disorders                                  | -               | -                  | 1 (5.9%)                    |
| Adrenal insufficiency                                | -               | -                  | 1 (5.9%)                    |
| Gastrointestinal disorders                           | 8 (61.5%)       | 7 (31.8%)          | 5 (29.4%)                   |
| Abdominal pain upper                                 | 1 (7.7%)        | -                  | -                           |
| Anal fissure                                         | 2 (15.4%)       | -                  | -                           |
| Anal fistula                                         | -               | -                  | 1 (5.9%)                    |
| Bile acid malabsorption                              | -               | 1 (4.5%)           | 1 (5.9%)                    |
| Colitis ulcerative                                   | -               | 1 (4.5%)           | -                           |
| Constipation                                         | 2 (15.4%)       | -                  | -                           |
| Crohn's disease                                      | 1 (7.7%)        | 5 (22.7%)          | 3 (17.6%)                   |
| Diarrhoea                                            | 1 (7.7%)        | -                  | -                           |
| Diarrhoea haemorrhagic                               | -               | 1 (4.5%)           | -                           |
| Enteritis                                            | -               | 1 (4.5%)           | -                           |
| Gastrointestinal pain                                | -               | 1 (4.5%)           | -                           |
| Ileal stenosis                                       | 1 (7.7%)        | -                  | -                           |
| Inguinal hernia                                      | -               | 1 (4.5%)           | -                           |
| Nausea                                               | -               | -                  | 1 (5.9%)                    |
| Pancreatitis                                         | 1 (7.7%)        | -                  | -                           |
| Subileus                                             | 1 (7.7%)        | -                  | -                           |
| Swollen tongue                                       | -               | -                  | 1 (5.9%)                    |
| Toothache                                            | -               | -                  | 1 (5.9%)                    |
| General disorders and administration site conditions | 2 (15.4%)       | 3 (13.6%)          | 3 (17.6%)                   |
| Drug ineffective                                     | 1 (7.7%)        | -                  | -                           |
| Injection site erythema                              | -               | 1 (4.5%)           | -                           |
| Oedema                                               | -               | -                  | 1 (5.9%)                    |
| Oedema peripheral                                    | -               | -                  | 1 (5.9%)                    |

Abbreviations: N, number of randomized subjects; n, number of subjects within each category; TEAE, Treatment Emergent Adverse Events; SOC, System Organ Class; PT, Preferred Term.

Program Name: MUCUS-Shell10b-V01  
 Output Location: .\Output\Shared\MUCUS-TFLS-Final-27MAR24-V01.pdf

Table 14.3.1.2: Summary of TEAEs by SOC and PT

|                                                | Naive<br>(N=13) | Biologic<br>(N=22) | Multiple Biologic<br>(N=17) |
|------------------------------------------------|-----------------|--------------------|-----------------------------|
| Peripheral swelling                            | -               | -                  | 1 (5.9%)                    |
| Pyrexia                                        | 1 (7.7%)        | 1 (4.5%)           | 2 (11.8%)                   |
| Sensation of foreign body                      | -               | 1 (4.5%)           | -                           |
| Hepatobiliary disorders                        | 1 (7.7%)        | 1 (4.5%)           | -                           |
| Cholangitis                                    | 1 (7.7%)        | -                  | -                           |
| Hepatic steatosis                              | -               | 1 (4.5%)           | -                           |
| Immune system disorders                        | -               | 1 (4.5%)           | -                           |
| Anaphylactic reaction                          | -               | 1 (4.5%)           | -                           |
| Infections and infestations                    | 5 (38.5%)       | 6 (27.3%)          | 5 (29.4%)                   |
| Abscess                                        | -               | 1 (4.5%)           | -                           |
| COVID-19                                       | 1 (7.7%)        | 2 (9.1%)           | -                           |
| Campylobacter infection                        | -               | 1 (4.5%)           | -                           |
| Clostridium difficile infection                | -               | -                  | 1 (5.9%)                    |
| Conjunctivitis                                 | 1 (7.7%)        | -                  | -                           |
| Gastrointestinal infection                     | -               | -                  | 1 (5.9%)                    |
| Genitourinary chlamydia infection              | 1 (7.7%)        | -                  | -                           |
| Lyme disease                                   | -               | -                  | 1 (5.9%)                    |
| Nasopharyngitis                                | 2 (15.4%)       | 1 (4.5%)           | 1 (5.9%)                    |
| Norovirus infection                            | 1 (7.7%)        | -                  | -                           |
| Oral herpes                                    | 1 (7.7%)        | 1 (4.5%)           | -                           |
| Respiratory tract infection                    | 1 (7.7%)        | -                  | -                           |
| Upper respiratory tract infection              | -               | 1 (4.5%)           | -                           |
| Urinary tract infection                        | 1 (7.7%)        | -                  | 2 (11.8%)                   |
| Injury, poisoning and procedural complications | 1 (7.7%)        | 2 (9.1%)           | -                           |
| Procedural pain                                | -               | 2 (9.1%)           | -                           |
| Seroma                                         | 1 (7.7%)        | -                  | -                           |
| Investigations                                 | -               | 2 (9.1%)           | 1 (5.9%)                    |
| Blood prolactin increased                      | -               | 1 (4.5%)           | -                           |
| Haemoglobin decreased                          | -               | -                  | 1 (5.9%)                    |
| Weight decreased                               | -               | 1 (4.5%)           | -                           |

Abbreviations: N, number of randomized subjects; n, number of subjects within each category; TEAE, Treatment Emergent Adverse Events; SOC, System Organ Class; PT, Preferred Term.

Program Name: MUCUS-Shell10b-V01  
 Output Location: .\Output\Shared\MUCUS-TFLS-Final-27MAR24-V01.pdf



Table 14.3.1.2: Summary of TEAEs by SOC and PT

|                                                 | Naive<br>(N=13) | Biologic<br>(N=22) | Multiple Biologic<br>(N=17) |
|-------------------------------------------------|-----------------|--------------------|-----------------------------|
| Metabolism and nutrition disorders              | 5 (38.5%)       | 1 (4.5%)           | 4 (23.5%)                   |
| Folate deficiency                               | 1 (7.7%)        | -                  | -                           |
| Hyperlipidaemia                                 | -               | -                  | 1 (5.9%)                    |
| Iron deficiency                                 | 1 (7.7%)        | -                  | 3 (17.6%)                   |
| Vitamin B12 deficiency                          | 2 (15.4%)       | -                  | 2 (11.8%)                   |
| Vitamin D deficiency                            | 2 (15.4%)       | 1 (4.5%)           | 1 (5.9%)                    |
| Zinc deficiency                                 | 1 (7.7%)        | -                  | -                           |
| Musculoskeletal and connective tissue disorders | 4 (30.8%)       | 2 (9.1%)           | 1 (5.9%)                    |
| Arthralgia                                      | 2 (15.4%)       | 2 (9.1%)           | -                           |
| Arthropathy                                     | 1 (7.7%)        | -                  | -                           |
| Fistula                                         | 1 (7.7%)        | -                  | -                           |
| Myalgia                                         | 1 (7.7%)        | -                  | -                           |
| Pain in extremity                               | -               | -                  | 1 (5.9%)                    |
| Nervous system disorders                        | 4 (30.8%)       | 1 (4.5%)           | 1 (5.9%)                    |
| Ataxia                                          | -               | 1 (4.5%)           | -                           |
| Dizziness                                       | -               | -                  | 1 (5.9%)                    |
| Headache                                        | 2 (15.4%)       | -                  | -                           |
| Migraine                                        | 1 (7.7%)        | -                  | -                           |
| Paraesthesia                                    | 1 (7.7%)        | -                  | -                           |
| Pregnancy, puerperium and perinatal conditions  | 1 (7.7%)        | 1 (4.5%)           | -                           |
| Abortion missed                                 | -               | 1 (4.5%)           | -                           |
| Pregnancy                                       | 1 (7.7%)        | 1 (4.5%)           | -                           |
| Reproductive system and breast disorders        | 1 (7.7%)        | 3 (13.6%)          | -                           |
| Cervical dysplasia                              | -               | 2 (9.1%)           | -                           |
| Dysmenorrhoea                                   | 1 (7.7%)        | -                  | -                           |
| Pruritus genital                                | -               | 1 (4.5%)           | -                           |
| Respiratory, thoracic and mediastinal disorders | -               | -                  | 1 (5.9%)                    |
| Asthma                                          | -               | -                  | 1 (5.9%)                    |
| Chronic obstructive pulmonary disease           | -               | -                  | 1 (5.9%)                    |
| Skin and subcutaneous tissue disorders          | 4 (30.8%)       | 3 (13.6%)          | 4 (23.5%)                   |

Abbreviations: N, number of randomized subjects; n, number of subjects within each category; TEAE, Treatment Emergent Adverse Events; SOC, System Organ Class; PT, Preferred Term.

Program Name: MUCUS-Shell10b-V01  
 Output Location: .\Output\Shared\MUCUS-TFLS-Final-27MAR24-V01.pdf

Table 14.3.1.2: Summary of TEAEs by SOC and PT

|                                 | Naive<br>(N=13) | Biologic<br>(N=22) | Multiple Biologic<br>(N=17) |
|---------------------------------|-----------------|--------------------|-----------------------------|
| Alopecia                        | 1 (7.7%)        | -                  | 1 (5.9%)                    |
| Cold urticaria                  | -               | 1 (4.5%)           | -                           |
| Eczema                          | 1 (7.7%)        | -                  | -                           |
| Hyperhidrosis                   | -               | -                  | 1 (5.9%)                    |
| Perioral dermatitis             | 1 (7.7%)        | -                  | -                           |
| Photosensitivity reaction       | 1 (7.7%)        | -                  | -                           |
| Pruritus                        | -               | -                  | 1 (5.9%)                    |
| Rash                            | 1 (7.7%)        | 1 (4.5%)           | 1 (5.9%)                    |
| Urticaria                       | -               | 1 (4.5%)           | 1 (5.9%)                    |
| Surgical and medical procedures | 1 (7.7%)        | 1 (4.5%)           | -                           |
| Anal fissure excision           | -               | 1 (4.5%)           | -                           |
| Tooth extraction                | 1 (7.7%)        | -                  | -                           |
| Vascular disorders              | 1 (7.7%)        | 1 (4.5%)           | -                           |
| Hypertension                    | -               | 1 (4.5%)           | -                           |
| Hypotension                     | 1 (7.7%)        | -                  | -                           |

Abbreviations: N, number of randomized subjects; n, number of subjects within each category; TEAE, Treatment Emergent Adverse Events; SOC, System Organ Class; PT, Preferred Term.

Program Name: MUCUS-Shell110b-V01

Output Location: .\Output\Shared\MUCUS-TFLS-Final-27MAR24-V01.pdf

Table 14.3.1.3: Summary of TEAEs by SOC, PT and Max Severity

|                                      | Naive<br>(N=13) | Biologic<br>(N=22) | Multiple Biologic<br>(N=17) |
|--------------------------------------|-----------------|--------------------|-----------------------------|
| Subjects with >= 1 TEAE              | 11 (84.6%)      | 14 (63.6%)         | 11 (64.7%)                  |
| Blood and lymphatic system disorders | -               | 1 (4.5%)           | 1 (5.9%)                    |
| Anaemia                              | -               | 1 (4.5%)           | -                           |
| Mild                                 | -               | -                  | -                           |
| Moderate                             | -               | -                  | -                           |
| Severe                               | -               | 1 (4.5%)           | -                           |
| Iron deficiency anaemia              | -               | 1 (4.5%)           | 1 (5.9%)                    |
| Mild                                 | -               | -                  | 1 (5.9%)                    |
| Moderate                             | -               | 1 (4.5%)           | -                           |
| Severe                               | -               | -                  | -                           |
| Endocrine disorders                  | -               | -                  | 1 (5.9%)                    |
| Adrenal insufficiency                | -               | -                  | 1 (5.9%)                    |
| Mild                                 | -               | -                  | 1 (5.9%)                    |
| Moderate                             | -               | -                  | -                           |
| Severe                               | -               | -                  | -                           |
| Gastrointestinal disorders           | 8 (61.5%)       | 7 (31.8%)          | 5 (29.4%)                   |
| Abdominal pain upper                 | 1 (7.7%)        | -                  | -                           |
| Mild                                 | 1 (7.7%)        | -                  | -                           |
| Moderate                             | -               | -                  | -                           |
| Severe                               | -               | -                  | -                           |
| Anal fissure                         | 2 (15.4%)       | -                  | -                           |
| Mild                                 | 1 (7.7%)        | -                  | -                           |
| Moderate                             | 1 (7.7%)        | -                  | -                           |
| Severe                               | -               | -                  | -                           |
| Anal fistula                         | -               | -                  | 1 (5.9%)                    |
| Mild                                 | -               | -                  | 1 (5.9%)                    |
| Moderate                             | -               | -                  | -                           |
| Severe                               | -               | -                  | -                           |
| Bile acid malabsorption              | -               | 1 (4.5%)           | 1 (5.9%)                    |
| Mild                                 | -               | -                  | -                           |

Abbreviations: N, number of randomized subjects; n, number of subjects within each category; TEAE, Treatment Emergent Adverse Events; SOC, System Organ Class; PT, Preferred Term.

Program Name: MUCUS-Shell10c-V01

Output Location: .\Output\Shared\MUCUS-TFLS-Final-27MAR24-V01.pdf

Table 14.3.1.3: Summary of TEAEs by SOC, PT and Max Severity

|                        | Naive<br>(N=13) | Biologic<br>(N=22) | Multiple Biologic<br>(N=17) |
|------------------------|-----------------|--------------------|-----------------------------|
| Moderate               | -               | 1 (4.5%)           | 1 (5.9%)                    |
| Severe                 | -               | -                  | -                           |
| Colitis ulcerative     | -               | 1 (4.5%)           | -                           |
| Mild                   | -               | -                  | -                           |
| Moderate               | -               | 1 (4.5%)           | -                           |
| Severe                 | -               | -                  | -                           |
| Constipation           | 2 (15.4%)       | -                  | -                           |
| Mild                   | 1 (7.7%)        | -                  | -                           |
| Moderate               | 1 (7.7%)        | -                  | -                           |
| Severe                 | -               | -                  | -                           |
| Crohn's disease        | 1 (7.7%)        | 5 (22.7%)          | 3 (17.6%)                   |
| Mild                   | -               | 1 (4.5%)           | -                           |
| Moderate               | 1 (7.7%)        | 3 (13.6%)          | 2 (11.8%)                   |
| Severe                 | -               | 1 (4.5%)           | 1 (5.9%)                    |
| Diarrhoea              | 1 (7.7%)        | -                  | -                           |
| Mild                   | -               | -                  | -                           |
| Moderate               | 1 (7.7%)        | -                  | -                           |
| Severe                 | -               | -                  | -                           |
| Diarrhoea haemorrhagic | -               | 1 (4.5%)           | -                           |
| Mild                   | -               | -                  | -                           |
| Moderate               | -               | 1 (4.5%)           | -                           |
| Severe                 | -               | -                  | -                           |
| Enteritis              | -               | 1 (4.5%)           | -                           |
| Mild                   | -               | 1 (4.5%)           | -                           |
| Moderate               | -               | -                  | -                           |
| Severe                 | -               | -                  | -                           |
| Gastrointestinal pain  | -               | 1 (4.5%)           | -                           |
| Mild                   | -               | -                  | -                           |
| Moderate               | -               | 1 (4.5%)           | -                           |
| Severe                 | -               | -                  | -                           |

Abbreviations: N, number of randomized subjects; n, number of subjects within each category; TEAE, Treatment Emergent Adverse Events; SOC, System Organ Class; PT, Preferred Term.

Program Name: MUCUS-Shell10c-V01  
 Output Location: .\Output\Shared\MUCUS-TFLS-Final-27MAR24-V01.pdf

Table 14.3.1.3: Summary of TEAEs by SOC, PT and Max Severity

|                                                      | Naive<br>(N=13) | Biologic<br>(N=22) | Multiple Biologic<br>(N=17) |
|------------------------------------------------------|-----------------|--------------------|-----------------------------|
| Ileal stenosis                                       | 1 (7.7%)        | -                  | -                           |
| Mild                                                 | -               | -                  | -                           |
| Moderate                                             | -               | -                  | -                           |
| Severe                                               | 1 (7.7%)        | -                  | -                           |
| Inguinal hernia                                      | -               | 1 (4.5%)           | -                           |
| Mild                                                 | -               | -                  | -                           |
| Moderate                                             | -               | 1 (4.5%)           | -                           |
| Severe                                               | -               | -                  | -                           |
| Nausea                                               | -               | -                  | 1 (5.9%)                    |
| Mild                                                 | -               | -                  | 1 (5.9%)                    |
| Moderate                                             | -               | -                  | -                           |
| Severe                                               | -               | -                  | -                           |
| Pancreatitis                                         | 1 (7.7%)        | -                  | -                           |
| Mild                                                 | -               | -                  | -                           |
| Moderate                                             | 1 (7.7%)        | -                  | -                           |
| Severe                                               | -               | -                  | -                           |
| Subileus                                             | 1 (7.7%)        | -                  | -                           |
| Mild                                                 | -               | -                  | -                           |
| Moderate                                             | -               | -                  | -                           |
| Severe                                               | 1 (7.7%)        | -                  | -                           |
| Swollen tongue                                       | -               | -                  | 1 (5.9%)                    |
| Mild                                                 | -               | -                  | 1 (5.9%)                    |
| Moderate                                             | -               | -                  | -                           |
| Severe                                               | -               | -                  | -                           |
| Toothache                                            | -               | -                  | 1 (5.9%)                    |
| Mild                                                 | -               | -                  | 1 (5.9%)                    |
| Moderate                                             | -               | -                  | -                           |
| Severe                                               | -               | -                  | -                           |
| General disorders and administration site conditions | 2 (15.4%)       | 3 (13.6%)          | 3 (17.6%)                   |
| Drug ineffective                                     | 1 (7.7%)        | -                  | -                           |

Abbreviations: N, number of randomized subjects; n, number of subjects within each category; TEAE, Treatment Emergent Adverse Events; SOC, System Organ Class; PT, Preferred Term.

Program Name: MUCUS-Shell10c-V01

Output Location: .\Output\Shared\MUCUS-TFLS-Final-27MAR24-V01.pdf

Table 14.3.1.3: Summary of TEAEs by SOC, PT and Max Severity

|                           | Naive<br>(N=13) | Biologic<br>(N=22) | Multiple Biologic<br>(N=17) |
|---------------------------|-----------------|--------------------|-----------------------------|
| Mild                      | -               | -                  | -                           |
| Moderate                  | -               | -                  | -                           |
| Severe                    | 1 (7.7%)        | -                  | -                           |
| Injection site erythema   | -               | 1 (4.5%)           | -                           |
| Mild                      | -               | 1 (4.5%)           | -                           |
| Moderate                  | -               | -                  | -                           |
| Severe                    | -               | -                  | -                           |
| Oedema                    | -               | -                  | 1 (5.9%)                    |
| Mild                      | -               | -                  | 1 (5.9%)                    |
| Moderate                  | -               | -                  | -                           |
| Severe                    | -               | -                  | -                           |
| Oedema peripheral         | -               | -                  | 1 (5.9%)                    |
| Mild                      | -               | -                  | -                           |
| Moderate                  | -               | -                  | 1 (5.9%)                    |
| Severe                    | -               | -                  | -                           |
| Peripheral swelling       | -               | -                  | 1 (5.9%)                    |
| Mild                      | -               | -                  | 1 (5.9%)                    |
| Moderate                  | -               | -                  | -                           |
| Severe                    | -               | -                  | -                           |
| Pyrexia                   | 1 (7.7%)        | 1 (4.5%)           | 2 (11.8%)                   |
| Mild                      | -               | -                  | 1 (5.9%)                    |
| Moderate                  | 1 (7.7%)        | 1 (4.5%)           | -                           |
| Severe                    | -               | -                  | 1 (5.9%)                    |
| Sensation of foreign body | -               | 1 (4.5%)           | -                           |
| Mild                      | -               | 1 (4.5%)           | -                           |
| Moderate                  | -               | -                  | -                           |
| Severe                    | -               | -                  | -                           |
| Hepatobiliary disorders   | 1 (7.7%)        | 1 (4.5%)           | -                           |
| Cholangitis               | 1 (7.7%)        | -                  | -                           |
| Mild                      | -               | -                  | -                           |

Abbreviations: N, number of randomized subjects; n, number of subjects within each category; TEAE, Treatment Emergent Adverse Events; SOC, System Organ Class; PT, Preferred Term.

Program Name: MUCUS-Shell10c-V01  
 Output Location: .\Output\Shared\MUCUS-TFLS-Final-27MAR24-V01.pdf

Table 14.3.1.3: Summary of TEAEs by SOC, PT and Max Severity

|                                 | Naive<br>(N=13) | Biologic<br>(N=22) | Multiple Biologic<br>(N=17) |
|---------------------------------|-----------------|--------------------|-----------------------------|
| Moderate                        | -               | -                  | -                           |
| Severe                          | 1 (7.7%)        | -                  | -                           |
| Hepatic steatosis               | -               | 1 (4.5%)           | -                           |
| Mild                            | -               | 1 (4.5%)           | -                           |
| Moderate                        | -               | -                  | -                           |
| Severe                          | -               | -                  | -                           |
| Immune system disorders         | -               | 1 (4.5%)           | -                           |
| Anaphylactic reaction           | -               | 1 (4.5%)           | -                           |
| Mild                            | -               | -                  | -                           |
| Moderate                        | -               | 1 (4.5%)           | -                           |
| Severe                          | -               | -                  | -                           |
| Infections and infestations     | 5 (38.5%)       | 6 (27.3%)          | 5 (29.4%)                   |
| Abscess                         | -               | 1 (4.5%)           | -                           |
| Mild                            | -               | 1 (4.5%)           | -                           |
| Moderate                        | -               | -                  | -                           |
| Severe                          | -               | -                  | -                           |
| COVID-19                        | 1 (7.7%)        | 2 (9.1%)           | -                           |
| Mild                            | 1 (7.7%)        | 2 (9.1%)           | -                           |
| Moderate                        | -               | -                  | -                           |
| Severe                          | -               | -                  | -                           |
| Campylobacter infection         | -               | 1 (4.5%)           | -                           |
| Mild                            | -               | 1 (4.5%)           | -                           |
| Moderate                        | -               | -                  | -                           |
| Severe                          | -               | -                  | -                           |
| Clostridium difficile infection | -               | -                  | 1 (5.9%)                    |
| Mild                            | -               | -                  | 1 (5.9%)                    |
| Moderate                        | -               | -                  | -                           |
| Severe                          | -               | -                  | -                           |
| Conjunctivitis                  | 1 (7.7%)        | -                  | -                           |
| Mild                            | 1 (7.7%)        | -                  | -                           |

Abbreviations: N, number of randomized subjects; n, number of subjects within each category; TEAE, Treatment Emergent Adverse Events; SOC, System Organ Class; PT, Preferred Term.

Program Name: MUCUS-Shell10c-V01

Output Location: .\Output\Shared\MUCUS-TFLS-Final-27MAR24-V01.pdf

Table 14.3.1.3: Summary of TEAEs by SOC, PT and Max Severity

|                                   | Naive<br>(N=13) | Biologic<br>(N=22) | Multiple Biologic<br>(N=17) |
|-----------------------------------|-----------------|--------------------|-----------------------------|
| Moderate                          | -               | -                  | -                           |
| Severe                            | -               | -                  | -                           |
| Gastrointestinal infection        | -               | -                  | 1 (5.9%)                    |
| Mild                              | -               | -                  | -                           |
| Moderate                          | -               | -                  | 1 (5.9%)                    |
| Severe                            | -               | -                  | -                           |
| Genitourinary chlamydia infection | 1 (7.7%)        | -                  | -                           |
| Mild                              | 1 (7.7%)        | -                  | -                           |
| Moderate                          | -               | -                  | -                           |
| Severe                            | -               | -                  | -                           |
| Lyme disease                      | -               | -                  | 1 (5.9%)                    |
| Mild                              | -               | -                  | -                           |
| Moderate                          | -               | -                  | 1 (5.9%)                    |
| Severe                            | -               | -                  | -                           |
| Nasopharyngitis                   | 2 (15.4%)       | 1 (4.5%)           | 1 (5.9%)                    |
| Mild                              | 1 (7.7%)        | 1 (4.5%)           | 1 (5.9%)                    |
| Moderate                          | 1 (7.7%)        | -                  | -                           |
| Severe                            | -               | -                  | -                           |
| Norovirus infection               | 1 (7.7%)        | -                  | -                           |
| Mild                              | -               | -                  | -                           |
| Moderate                          | -               | -                  | -                           |
| Severe                            | 1 (7.7%)        | -                  | -                           |
| Oral herpes                       | 1 (7.7%)        | 1 (4.5%)           | -                           |
| Mild                              | -               | -                  | -                           |
| Moderate                          | 1 (7.7%)        | 1 (4.5%)           | -                           |
| Severe                            | -               | -                  | -                           |
| Respiratory tract infection       | 1 (7.7%)        | -                  | -                           |
| Mild                              | -               | -                  | -                           |
| Moderate                          | 1 (7.7%)        | -                  | -                           |
| Severe                            | -               | -                  | -                           |

Abbreviations: N, number of randomized subjects; n, number of subjects within each category; TEAE, Treatment Emergent Adverse Events; SOC, System Organ Class; PT, Preferred Term.

Program Name: MUCUS-Shell10c-V01  
 Output Location: .\Output\Shared\MUCUS-TFLS-Final-27MAR24-V01.pdf



Table 14.3.1.3: Summary of TEAEs by SOC, PT and Max Severity

|                                                | Naive<br>(N=13) | Biologic<br>(N=22) | Multiple Biologic<br>(N=17) |
|------------------------------------------------|-----------------|--------------------|-----------------------------|
| Upper respiratory tract infection              | -               | 1 (4.5%)           | -                           |
| Mild                                           | -               | 1 (4.5%)           | -                           |
| Moderate                                       | -               | -                  | -                           |
| Severe                                         | -               | -                  | -                           |
| Urinary tract infection                        | 1 (7.7%)        | -                  | 2 (11.8%)                   |
| Mild                                           | -               | -                  | 1 (5.9%)                    |
| Moderate                                       | 1 (7.7%)        | -                  | 1 (5.9%)                    |
| Severe                                         | -               | -                  | -                           |
| Injury, poisoning and procedural complications | 1 (7.7%)        | 2 (9.1%)           | -                           |
| Procedural pain                                | -               | 2 (9.1%)           | -                           |
| Mild                                           | -               | 1 (4.5%)           | -                           |
| Moderate                                       | -               | 1 (4.5%)           | -                           |
| Severe                                         | -               | -                  | -                           |
| Seroma                                         | 1 (7.7%)        | -                  | -                           |
| Mild                                           | -               | -                  | -                           |
| Moderate                                       | 1 (7.7%)        | -                  | -                           |
| Severe                                         | -               | -                  | -                           |
| Investigations                                 | -               | 2 (9.1%)           | 1 (5.9%)                    |
| Blood prolactin increased                      | -               | 1 (4.5%)           | -                           |
| Mild                                           | -               | 1 (4.5%)           | -                           |
| Moderate                                       | -               | -                  | -                           |
| Severe                                         | -               | -                  | -                           |
| Haemoglobin decreased                          | -               | -                  | 1 (5.9%)                    |
| Mild                                           | -               | -                  | -                           |
| Moderate                                       | -               | -                  | 1 (5.9%)                    |
| Severe                                         | -               | -                  | -                           |
| Weight decreased                               | -               | 1 (4.5%)           | -                           |
| Mild                                           | -               | 1 (4.5%)           | -                           |
| Moderate                                       | -               | -                  | -                           |
| Severe                                         | -               | -                  | -                           |

Abbreviations: N, number of randomized subjects; n, number of subjects within each category; TEAE, Treatment Emergent Adverse Events; SOC, System Organ Class; PT, Preferred Term.

Program Name: MUCUS-Shell10c-V01  
 Output Location: .\Output\Shared\MUCUS-TFLS-Final-27MAR24-V01.pdf

Table 14.3.1.3: Summary of TEAEs by SOC, PT and Max Severity

|                                                 | Naive<br>(N=13) | Biologic<br>(N=22) | Multiple Biologic<br>(N=17) |
|-------------------------------------------------|-----------------|--------------------|-----------------------------|
| Metabolism and nutrition disorders              | 5 (38.5%)       | 1 (4.5%)           | 4 (23.5%)                   |
| Folate deficiency                               | 1 (7.7%)        | -                  | -                           |
| Mild                                            | 1 (7.7%)        | -                  | -                           |
| Moderate                                        | -               | -                  | -                           |
| Severe                                          | -               | -                  | -                           |
| Hyperlipidaemia                                 | -               | -                  | 1 (5.9%)                    |
| Mild                                            | -               | -                  | -                           |
| Moderate                                        | -               | -                  | 1 (5.9%)                    |
| Severe                                          | -               | -                  | -                           |
| Iron deficiency                                 | 1 (7.7%)        | -                  | 3 (17.6%)                   |
| Mild                                            | -               | -                  | 1 (5.9%)                    |
| Moderate                                        | 1 (7.7%)        | -                  | 2 (11.8%)                   |
| Severe                                          | -               | -                  | -                           |
| Vitamin B12 deficiency                          | 2 (15.4%)       | -                  | 2 (11.8%)                   |
| Mild                                            | 2 (15.4%)       | -                  | 1 (5.9%)                    |
| Moderate                                        | -               | -                  | 1 (5.9%)                    |
| Severe                                          | -               | -                  | -                           |
| Vitamin D deficiency                            | 2 (15.4%)       | 1 (4.5%)           | 1 (5.9%)                    |
| Mild                                            | 1 (7.7%)        | 1 (4.5%)           | 1 (5.9%)                    |
| Moderate                                        | 1 (7.7%)        | -                  | -                           |
| Severe                                          | -               | -                  | -                           |
| Zinc deficiency                                 | 1 (7.7%)        | -                  | -                           |
| Mild                                            | 1 (7.7%)        | -                  | -                           |
| Moderate                                        | -               | -                  | -                           |
| Severe                                          | -               | -                  | -                           |
| Musculoskeletal and connective tissue disorders | 4 (30.8%)       | 2 (9.1%)           | 1 (5.9%)                    |
| Arthralgia                                      | 2 (15.4%)       | 2 (9.1%)           | -                           |
| Mild                                            | 1 (7.7%)        | 1 (4.5%)           | -                           |
| Moderate                                        | 1 (7.7%)        | 1 (4.5%)           | -                           |
| Severe                                          | -               | -                  | -                           |

Abbreviations: N, number of randomized subjects; n, number of subjects within each category; TEAE, Treatment Emergent Adverse Events; SOC, System Organ Class; PT, Preferred Term.

Program Name: MUCUS-Shell10c-V01

Output Location: .\Output\Shared\MUCUS-TFLS-Final-27MAR24-V01.pdf

Table 14.3.1.3: Summary of TEAEs by SOC, PT and Max Severity

|                          | Naive<br>(N=13) | Biologic<br>(N=22) | Multiple Biologic<br>(N=17) |
|--------------------------|-----------------|--------------------|-----------------------------|
| Arthropathy              | 1 (7.7%)        | -                  | -                           |
| Mild                     | 1 (7.7%)        | -                  | -                           |
| Moderate                 | -               | -                  | -                           |
| Severe                   | -               | -                  | -                           |
| Fistula                  | 1 (7.7%)        | -                  | -                           |
| Mild                     | -               | -                  | -                           |
| Moderate                 | 1 (7.7%)        | -                  | -                           |
| Severe                   | -               | -                  | -                           |
| Myalgia                  | 1 (7.7%)        | -                  | -                           |
| Mild                     | 1 (7.7%)        | -                  | -                           |
| Moderate                 | -               | -                  | -                           |
| Severe                   | -               | -                  | -                           |
| Pain in extremity        | -               | -                  | 1 (5.9%)                    |
| Mild                     | -               | -                  | 1 (5.9%)                    |
| Moderate                 | -               | -                  | -                           |
| Severe                   | -               | -                  | -                           |
| Nervous system disorders | 4 (30.8%)       | 1 (4.5%)           | 1 (5.9%)                    |
| Ataxia                   | -               | 1 (4.5%)           | -                           |
| Mild                     | -               | -                  | -                           |
| Moderate                 | -               | 1 (4.5%)           | -                           |
| Severe                   | -               | -                  | -                           |
| Dizziness                | -               | -                  | 1 (5.9%)                    |
| Mild                     | -               | -                  | 1 (5.9%)                    |
| Moderate                 | -               | -                  | -                           |
| Severe                   | -               | -                  | -                           |
| Headache                 | 2 (15.4%)       | -                  | -                           |
| Mild                     | -               | -                  | -                           |
| Moderate                 | 2 (15.4%)       | -                  | -                           |
| Severe                   | -               | -                  | -                           |
| Migraine                 | 1 (7.7%)        | -                  | -                           |

Abbreviations: N, number of randomized subjects; n, number of subjects within each category; TEAE, Treatment Emergent Adverse Events; SOC, System Organ Class; PT, Preferred Term.

Program Name: MUCUS-Shell10c-V01

Output Location: .\Output\Shared\MUCUS-TFLS-Final-27MAR24-V01.pdf

Table 14.3.1.3: Summary of TEAEs by SOC, PT and Max Severity

|                                                 | Naive<br>(N=13) | Biologic<br>(N=22) | Multiple Biologic<br>(N=17) |
|-------------------------------------------------|-----------------|--------------------|-----------------------------|
| Mild                                            | -               | -                  | -                           |
| Moderate                                        | 1 (7.7%)        | -                  | -                           |
| Severe                                          | -               | -                  | -                           |
| Paraesthesia                                    | 1 (7.7%)        | -                  | -                           |
| Mild                                            | -               | -                  | -                           |
| Moderate                                        | 1 (7.7%)        | -                  | -                           |
| Severe                                          | -               | -                  | -                           |
| Pregnancy, puerperium and perinatal conditions  | 1 (7.7%)        | 1 (4.5%)           | -                           |
| Abortion missed                                 | -               | 1 (4.5%)           | -                           |
| Mild                                            | -               | -                  | -                           |
| Moderate                                        | -               | -                  | -                           |
| Severe                                          | -               | 1 (4.5%)           | -                           |
| Pregnancy                                       | 1 (7.7%)        | 1 (4.5%)           | -                           |
| Mild                                            | 1 (7.7%)        | -                  | -                           |
| Moderate                                        | -               | -                  | -                           |
| Severe                                          | -               | 1 (4.5%)           | -                           |
| Reproductive system and breast disorders        | 1 (7.7%)        | 3 (13.6%)          | -                           |
| Cervical dysplasia                              | -               | 2 (9.1%)           | -                           |
| Mild                                            | -               | 2 (9.1%)           | -                           |
| Moderate                                        | -               | -                  | -                           |
| Severe                                          | -               | -                  | -                           |
| Dysmenorrhoea                                   | 1 (7.7%)        | -                  | -                           |
| Mild                                            | 1 (7.7%)        | -                  | -                           |
| Moderate                                        | -               | -                  | -                           |
| Severe                                          | -               | -                  | -                           |
| Pruritus genital                                | -               | 1 (4.5%)           | -                           |
| Mild                                            | -               | -                  | -                           |
| Moderate                                        | -               | 1 (4.5%)           | -                           |
| Severe                                          | -               | -                  | -                           |
| Respiratory, thoracic and mediastinal disorders | -               | -                  | 1 (5.9%)                    |

Abbreviations: N, number of randomized subjects; n, number of subjects within each category; TEAE, Treatment Emergent Adverse Events; SOC, System Organ Class; PT, Preferred Term.

Program Name: MUCUS-Shell10c-V01  
 Output Location: .\Output\Shared\MUCUS-TFLS-Final-27MAR24-V01.pdf

Table 14.3.1.3: Summary of TEAEs by SOC, PT and Max Severity

|                                        | Naive<br>(N=13) | Biologic<br>(N=22) | Multiple Biologic<br>(N=17) |
|----------------------------------------|-----------------|--------------------|-----------------------------|
| Asthma                                 | -               | -                  | 1 (5.9%)                    |
| Mild                                   | -               | -                  | -                           |
| Moderate                               | -               | -                  | 1 (5.9%)                    |
| Severe                                 | -               | -                  | -                           |
| Chronic obstructive pulmonary disease  | -               | -                  | 1 (5.9%)                    |
| Mild                                   | -               | -                  | -                           |
| Moderate                               | -               | -                  | 1 (5.9%)                    |
| Severe                                 | -               | -                  | -                           |
| Skin and subcutaneous tissue disorders | 4 (30.8%)       | 3 (13.6%)          | 4 (23.5%)                   |
| Alopecia                               | 1 (7.7%)        | -                  | 1 (5.9%)                    |
| Mild                                   | 1 (7.7%)        | -                  | -                           |
| Moderate                               | -               | -                  | 1 (5.9%)                    |
| Severe                                 | -               | -                  | -                           |
| Cold urticaria                         | -               | 1 (4.5%)           | -                           |
| Mild                                   | -               | -                  | -                           |
| Moderate                               | -               | 1 (4.5%)           | -                           |
| Severe                                 | -               | -                  | -                           |
| Eczema                                 | 1 (7.7%)        | -                  | -                           |
| Mild                                   | 1 (7.7%)        | -                  | -                           |
| Moderate                               | -               | -                  | -                           |
| Severe                                 | -               | -                  | -                           |
| Hyperhidrosis                          | -               | -                  | 1 (5.9%)                    |
| Mild                                   | -               | -                  | 1 (5.9%)                    |
| Moderate                               | -               | -                  | -                           |
| Severe                                 | -               | -                  | -                           |
| Perioral dermatitis                    | 1 (7.7%)        | -                  | -                           |
| Mild                                   | -               | -                  | -                           |
| Moderate                               | 1 (7.7%)        | -                  | -                           |
| Severe                                 | -               | -                  | -                           |
| Photosensitivity reaction              | 1 (7.7%)        | -                  | -                           |

Abbreviations: N, number of randomized subjects; n, number of subjects within each category; TEAE, Treatment Emergent Adverse Events; SOC, System Organ Class; PT, Preferred Term.

Program Name: MUCUS-Shell10c-V01

Output Location: .\Output\Shared\MUCUS-TFLS-Final-27MAR24-V01.pdf

Table 14.3.1.3: Summary of TEAEs by SOC, PT and Max Severity

|                                 | Naive<br>(N=13) | Biologic<br>(N=22) | Multiple Biologic<br>(N=17) |
|---------------------------------|-----------------|--------------------|-----------------------------|
| Mild                            | 1 (7.7%)        | -                  | -                           |
| Moderate                        | -               | -                  | -                           |
| Severe                          | -               | -                  | -                           |
| Pruritus                        | -               | -                  | 1 (5.9%)                    |
| Mild                            | -               | -                  | 1 (5.9%)                    |
| Moderate                        | -               | -                  | -                           |
| Severe                          | -               | -                  | -                           |
| Rash                            | 1 (7.7%)        | 1 (4.5%)           | 1 (5.9%)                    |
| Mild                            | 1 (7.7%)        | 1 (4.5%)           | 1 (5.9%)                    |
| Moderate                        | -               | -                  | -                           |
| Severe                          | -               | -                  | -                           |
| Urticaria                       | -               | 1 (4.5%)           | 1 (5.9%)                    |
| Mild                            | -               | -                  | 1 (5.9%)                    |
| Moderate                        | -               | 1 (4.5%)           | -                           |
| Severe                          | -               | -                  | -                           |
| Surgical and medical procedures | 1 (7.7%)        | 1 (4.5%)           | -                           |
| Anal fissure excision           | -               | 1 (4.5%)           | -                           |
| Mild                            | -               | 1 (4.5%)           | -                           |
| Moderate                        | -               | -                  | -                           |
| Severe                          | -               | -                  | -                           |
| Tooth extraction                | 1 (7.7%)        | -                  | -                           |
| Mild                            | 1 (7.7%)        | -                  | -                           |
| Moderate                        | -               | -                  | -                           |
| Severe                          | -               | -                  | -                           |
| Vascular disorders              | 1 (7.7%)        | 1 (4.5%)           | -                           |
| Hypertension                    | -               | 1 (4.5%)           | -                           |
| Mild                            | -               | 1 (4.5%)           | -                           |
| Moderate                        | -               | -                  | -                           |
| Severe                          | -               | -                  | -                           |
| Hypotension                     | 1 (7.7%)        | -                  | -                           |

Abbreviations: N, number of randomized subjects; n, number of subjects within each category; TEAE, Treatment Emergent Adverse Events; SOC, System Organ Class; PT, Preferred Term.

Program Name: MUCUS-Shell10c-V01

Output Location: .\Output\Shared\MUCUS-TFLS-Final-27MAR24-V01.pdf

Table 14.3.1.3: Summary of TEAEs by SOC, PT and Max Severity

|          | Naive<br>(N=13) | Biologic<br>(N=22) | Multiple Biologic<br>(N=17) |
|----------|-----------------|--------------------|-----------------------------|
| Mild     | 1 (7.7%)        | -                  | -                           |
| Moderate | -               | -                  | -                           |
| Severe   | -               | -                  | -                           |

Abbreviations: N, number of randomized subjects; n, number of subjects within each category; TEAE, Treatment Emergent Adverse Events; SOC, System Organ Class; PT, Preferred Term.

Program Name: MUCUS-Shell110c-V01

Output Location: .\Output\Shared\MUCUS-TFLS-Final-27MAR24-V01.pdf

Table 14.3.1.4: Summary of Severe (CTCAE Grade  $\geq$  3) TEAEs by SOC and PT

|                                                      | Naive<br>(N=13) | Biologic<br>(N=22) | Multiple Biologic<br>(N=17) |
|------------------------------------------------------|-----------------|--------------------|-----------------------------|
| Subjects with $\geq$ 1 TEAE                          | 3 (23.1%)       | 3 (13.6%)          | 2 (11.8%)                   |
| Blood and lymphatic system disorders                 | -               | 1 (4.5%)           | -                           |
| Anaemia                                              | -               | 1 (4.5%)           | -                           |
| Gastrointestinal disorders                           | 1 (7.7%)        | 1 (4.5%)           | 1 (5.9%)                    |
| Crohn's disease                                      | -               | 1 (4.5%)           | 1 (5.9%)                    |
| Ileal stenosis                                       | 1 (7.7%)        | -                  | -                           |
| Subileus                                             | 1 (7.7%)        | -                  | -                           |
| General disorders and administration site conditions | 1 (7.7%)        | -                  | 1 (5.9%)                    |
| Drug ineffective                                     | 1 (7.7%)        | -                  | -                           |
| Pyrexia                                              | -               | -                  | 1 (5.9%)                    |
| Hepatobiliary disorders                              | 1 (7.7%)        | -                  | -                           |
| Cholangitis                                          | 1 (7.7%)        | -                  | -                           |
| Infections and infestations                          | 1 (7.7%)        | -                  | -                           |
| Norovirus infection                                  | 1 (7.7%)        | -                  | -                           |
| Pregnancy, puerperium and perinatal conditions       | -               | 1 (4.5%)           | -                           |
| Abortion missed                                      | -               | 1 (4.5%)           | -                           |
| Pregnancy                                            | -               | 1 (4.5%)           | -                           |

Abbreviations: N, number of randomized subjects; n, number of subjects within each category; CTCAE, Common Terminology for Adverse Events; TEAE, Treatment Emergent Adverse Event; SOC, System Organ Class; PT, Preferred Term.

Program Name: MUCUS-Shell10b-V01

Output Location: .\Output\Shared\MUCUS-TFLS-Final-27MAR24-V01.pdf



Table 14.3.1.5: Summary of Related TEAEs by SOC and PT

|                                                      | Naive<br>(N=13) | Biologic<br>(N=22) | Multiple Biologic<br>(N=17) |
|------------------------------------------------------|-----------------|--------------------|-----------------------------|
| Subjects with >= 1 TEAE                              | 5 (38.5%)       | 6 (27.3%)          | 5 (29.4%)                   |
| General disorders and administration site conditions | 1 (7.7%)        | 1 (4.5%)           | -                           |
| Drug ineffective                                     | 1 (7.7%)        | -                  | -                           |
| Injection site erythema                              | -               | 1 (4.5%)           | -                           |
| Infections and infestations                          | 2 (15.4%)       | -                  | 3 (17.6%)                   |
| Gastrointestinal infection                           | -               | -                  | 1 (5.9%)                    |
| Nasopharyngitis                                      | -               | -                  | 1 (5.9%)                    |
| Oral herpes                                          | 1 (7.7%)        | -                  | -                           |
| Respiratory tract infection                          | 1 (7.7%)        | -                  | -                           |
| Urinary tract infection                              | -               | -                  | 1 (5.9%)                    |
| Musculoskeletal and connective tissue disorders      | -               | 1 (4.5%)           | -                           |
| Arthralgia                                           | -               | 1 (4.5%)           | -                           |
| Pregnancy, puerperium and perinatal conditions       | -               | 1 (4.5%)           | -                           |
| Abortion missed                                      | -               | 1 (4.5%)           | -                           |
| Reproductive system and breast disorders             | -               | 1 (4.5%)           | -                           |
| Pruritus genital                                     | -               | 1 (4.5%)           | -                           |
| Skin and subcutaneous tissue disorders               | 3 (23.1%)       | 1 (4.5%)           | 2 (11.8%)                   |
| Alopecia                                             | 1 (7.7%)        | -                  | -                           |
| Cold urticaria                                       | -               | 1 (4.5%)           | -                           |
| Eczema                                               | 1 (7.7%)        | -                  | -                           |
| Photosensitivity reaction                            | 1 (7.7%)        | -                  | -                           |
| Pruritus                                             | -               | -                  | 1 (5.9%)                    |
| Rash                                                 | 1 (7.7%)        | -                  | 1 (5.9%)                    |
| Vascular disorders                                   | -               | 1 (4.5%)           | -                           |
| Hypertension                                         | -               | 1 (4.5%)           | -                           |

Abbreviations: N, number of randomized subjects; n, number of subjects within each category; TEAE, Treatment Emergent Adverse Event; SOC, System Organ Class; PT, Preferred Term.

Program Name: MUCUS-Shell10b-V01  
 Output Location: .\Output\Shared\MUCUS-TFLS-Final-27MAR24-V01.pdf

Table 14.3.1.6: Summary of Serious TEAEs by SOC and PT

|                                                      | Naive<br>(N=13) | Biologic<br>(N=22) | Multiple Biologic<br>(N=17) |
|------------------------------------------------------|-----------------|--------------------|-----------------------------|
| Subjects with >= 1 TEAE                              | 3 (23.1%)       | 6 (27.3%)          | 2 (11.8%)                   |
| Blood and lymphatic system disorders                 | -               | 1 (4.5%)           | -                           |
| Anaemia                                              | -               | 1 (4.5%)           | -                           |
| Gastrointestinal disorders                           | 1 (7.7%)        | 3 (13.6%)          | 1 (5.9%)                    |
| Crohn's disease                                      | -               | 3 (13.6%)          | 1 (5.9%)                    |
| Ileal stenosis                                       | 1 (7.7%)        | -                  | -                           |
| Subileus                                             | 1 (7.7%)        | -                  | -                           |
| General disorders and administration site conditions | 1 (7.7%)        | 1 (4.5%)           | 1 (5.9%)                    |
| Drug ineffective                                     | 1 (7.7%)        | -                  | -                           |
| Pyrexia                                              | -               | 1 (4.5%)           | 1 (5.9%)                    |
| Hepatobiliary disorders                              | 1 (7.7%)        | -                  | -                           |
| Cholangitis                                          | 1 (7.7%)        | -                  | -                           |
| Infections and infestations                          | 1 (7.7%)        | 1 (4.5%)           | -                           |
| Abscess                                              | -               | 1 (4.5%)           | -                           |
| COVID-19                                             | -               | 1 (4.5%)           | -                           |
| Norovirus infection                                  | 1 (7.7%)        | -                  | -                           |
| Injury, poisoning and procedural complications       | -               | 1 (4.5%)           | -                           |
| Procedural pain                                      | -               | 1 (4.5%)           | -                           |
| Nervous system disorders                             | -               | 1 (4.5%)           | -                           |
| Ataxia                                               | -               | 1 (4.5%)           | -                           |
| Pregnancy, puerperium and perinatal conditions       | -               | 1 (4.5%)           | -                           |
| Abortion missed                                      | -               | 1 (4.5%)           | -                           |
| Pregnancy                                            | -               | 1 (4.5%)           | -                           |

Abbreviations: N, number of randomized subjects; n, number of subjects within each category; TEAE, Treatment Emergent Adverse Event; SOC, System Organ Class; PT, Preferred Term.

Program Name: MUCUS-Shell110b-V01

Output Location: .\Output\Shared\MUCUS-TFLS-Final-27MAR24-V01.pdf

Table 14.3.1.7: Summary of Related Serious TEAEs by SOC and PT

|                                                      | Naive<br>(N=13) | Biologic<br>(N=22) | Multiple Biologic<br>(N=17) |
|------------------------------------------------------|-----------------|--------------------|-----------------------------|
| Subjects with >= 1 TEAE                              | 1 (7.7%)        | 1 (4.5%)           | -                           |
| General disorders and administration site conditions | 1 (7.7%)        | -                  | -                           |
| Drug ineffective                                     | 1 (7.7%)        | -                  | -                           |
| Pregnancy, puerperium and perinatal conditions       | -               | 1 (4.5%)           | -                           |
| Abortion missed                                      | -               | 1 (4.5%)           | -                           |

Abbreviations: N, number of randomized subjects; n, number of subjects within each category; TEAE, Treatment Emergent Adverse Event; SOC, System Organ Class; PT, Preferred Term.

Program Name: MUCUS-Shell10b-V01

Output Location: .\Output\Shared\MUCUS-TFLS-Final-27MAR24-V01.pdf

Table 14.3.1.8: Summary of Infusion Reaction TEAEs by SOC and PT

|                             | Naive<br>(N=13) | Biologic<br>(N=22) | Multiple Biologic<br>(N=17) |
|-----------------------------|-----------------|--------------------|-----------------------------|
| Subjects with $\geq 1$ TEAE | -               | -                  | -                           |

Abbreviations: N, number of randomized subjects; n, number of subjects within each category; TEAE, Treatment Emergent Adverse Event; SOC, System Organ Class; PT, Preferred Term.

Program Name: MUCUS-Shell10b-V01

Output Location: .\Output\Shared\MUCUS-TFLS-Final-27MAR24-V01.pdf

Table 14.3.1.9: Summary of Injection-Site Reaction TEAEs by SOC and PT

|                                                      | Naive<br>(N=13) | Biologic<br>(N=22) | Multiple Biologic<br>(N=17) |
|------------------------------------------------------|-----------------|--------------------|-----------------------------|
| Subjects with >= 1 TEAE                              | 2 (15.4%)       | 3 (13.6%)          | 3 (17.6%)                   |
| General disorders and administration site conditions | 2 (15.4%)       | 3 (13.6%)          | 3 (17.6%)                   |
| Drug ineffective                                     | 1 (7.7%)        | -                  | -                           |
| Injection site erythema                              | -               | 1 (4.5%)           | -                           |
| Oedema                                               | -               | -                  | 1 (5.9%)                    |
| Oedema peripheral                                    | -               | -                  | 1 (5.9%)                    |
| Peripheral swelling                                  | -               | -                  | 1 (5.9%)                    |
| Pyrexia                                              | 1 (7.7%)        | 1 (4.5%)           | 2 (11.8%)                   |
| Sensation of foreign body                            | -               | 1 (4.5%)           | -                           |

Abbreviations: N, number of randomized subjects; n, number of subjects within each category; TEAE, Treatment Emergent Adverse Event; SOC, System Organ Class; PT, Preferred Term.

Program Name: MUCUS-Shell10b-V01

Output Location: .\Output\Shared\MUCUS-TFLS-Final-27MAR24-V01.pdf

Table 14.3.1.10: Summary of Infection TEAEs by SOC and PT

|                                   | Naive<br>(N=13) | Biologic<br>(N=22) | Multiple Biologic<br>(N=17) |
|-----------------------------------|-----------------|--------------------|-----------------------------|
| Subjects with >= 1 TEAE           | 5 (38.5%)       | 6 (27.3%)          | 5 (29.4%)                   |
| Infections and infestations       | 5 (38.5%)       | 6 (27.3%)          | 5 (29.4%)                   |
| Abscess                           | -               | 1 (4.5%)           | -                           |
| COVID-19                          | 1 (7.7%)        | 2 (9.1%)           | -                           |
| Campylobacter infection           | -               | 1 (4.5%)           | -                           |
| Clostridium difficile infection   | -               | -                  | 1 (5.9%)                    |
| Conjunctivitis                    | 1 (7.7%)        | -                  | -                           |
| Gastrointestinal infection        | -               | -                  | 1 (5.9%)                    |
| Genitourinary chlamydia infection | 1 (7.7%)        | -                  | -                           |
| Lyme disease                      | -               | -                  | 1 (5.9%)                    |
| Nasopharyngitis                   | 2 (15.4%)       | 1 (4.5%)           | 1 (5.9%)                    |
| Norovirus infection               | 1 (7.7%)        | -                  | -                           |
| Oral herpes                       | 1 (7.7%)        | 1 (4.5%)           | -                           |
| Respiratory tract infection       | 1 (7.7%)        | -                  | -                           |
| Upper respiratory tract infection | -               | 1 (4.5%)           | -                           |
| Urinary tract infection           | 1 (7.7%)        | -                  | 2 (11.8%)                   |

Abbreviations: N, number of randomized subjects; n, number of subjects within each category; TEAE, Treatment Emergent Adverse Event; SOC, System Organ Class; PT, Preferred Term.

Program Name: MUCUS-Shell10b-V01

Output Location: .\Output\Shared\MUCUS-TFLS-Final-27MAR24-V01.pdf

Table 14.3.1.11: Summary of Steroid Tapering at Week 0, 8 ,16, 26, 36, 52

|                      | Naive<br>(N=13) | Biologic<br>(N=22) | Multiple Biologic<br>(N=17) |
|----------------------|-----------------|--------------------|-----------------------------|
| <b>Steroid (mg)</b>  |                 |                    |                             |
| <b>Baseline: OBS</b> |                 |                    |                             |
| N                    | 6               | 5                  | 9                           |
| Missing              | 7               | 17                 | 8                           |
| Mean (SD)            | 28.1 (12.03)    | 25.0 (14.13)       | 33.0 (10.73)                |
| Median (Min, Max)    | 30.0 (9, 40)    | 20.0 (10, 40)      | 40.0 (8, 40)                |
| <b>Week 8: OBS</b>   |                 |                    |                             |
| N                    | 6               | 4                  | 9                           |
| Missing              | 7               | 18                 | 8                           |
| Mean (SD)            | 24.8 (17.79)    | 18.7 (16.50)       | 26.4 (16.15)                |
| Median (Min, Max)    | 30.0 (0, 40)    | 17.5 (0, 40)       | 30.0 (0, 40)                |
| <b>Week 16: OBS</b>  |                 |                    |                             |
| N                    | 4               | 4                  | 8                           |
| Missing              | 9               | 18                 | 9                           |
| Mean (SD)            | 12.5 (18.91)    | 13.7 (18.86)       | 15.0 (18.51)                |
| Median (Min, Max)    | 5.0 (0, 40)     | 7.5 (0, 40)        | 5.0 (0, 40)                 |
| <b>Week 26: OBS</b>  |                 |                    |                             |
| N                    | 3               | 2                  | 4                           |
| Missing              | 10              | 20                 | 13                          |
| Mean (SD)            | 20.0 (19.98)    | 7.5 (10.61)        | 27.5 (18.92)                |
| Median (Min, Max)    | 20.0 (0, 40)    | 7.5 (0, 15)        | 35.0 (0, 40)                |
| <b>Week 36: OBS</b>  |                 |                    |                             |
| N                    | 3               | 2                  | 5                           |
| Missing              | 10              | 20                 | 12                          |
| Mean (SD)            | 13.3 (23.07)    | 20.0 (28.26)       | 22.0 (20.49)                |
| Median (Min, Max)    | 0.0 (0, 40)     | 20.0 (0, 40)       | 30.0 (0, 40)                |
| <b>Week 52: OBS</b>  |                 |                    |                             |
| N                    | 4               | 4                  | 7                           |
| Missing              | 9               | 18                 | 10                          |
| Mean (SD)            | 10.0 (19.98)    | 13.7 (18.86)       | 16.4 (19.30)                |
| Median (Min, Max)    | 0.0 (0, 40)     | 7.5 (0, 40)        | 5.0 (0, 40)                 |

Abbreviations: N, number of randomized subjects; n, number of subjects within each category.

Table 14.3.1.12: Summary of Montreal Classification Phenotype at Week 0, 8 ,16, 26, 36, 52

|                                  | Naive<br>(N=13) | Biologic<br>(N=22) | Multiple Biologic<br>(N=17) |
|----------------------------------|-----------------|--------------------|-----------------------------|
| <b>Baseline</b>                  |                 |                    |                             |
| Age at Diagnosis: (years)        |                 |                    |                             |
| Below 16y                        | 1 (7.7%)        | 3 (13.6%)          | 2 (11.8%)                   |
| Between 17 and 40y               | 10 (76.9%)      | 14 (63.6%)         | 14 (82.4%)                  |
| Above 40y                        | 2 (15.4%)       | 5 (22.7%)          | 1 (5.9%)                    |
| Location:                        |                 |                    |                             |
| Ileal                            | 2 (15.4%)       | 4 (18.2%)          | 1 (5.9%)                    |
| Colonic                          | 5 (38.5%)       | 3 (13.6%)          | 7 (41.2%)                   |
| Ileocolonic                      | 4 (30.8%)       | 11 (50.0%)         | 9 (52.9%)                   |
| Isolated Upper Disease           | 2 (15.4%)       | 4 (18.2%)          | -                           |
| Behavior:                        |                 |                    |                             |
| Non-stricturing, non-penetrating | 9 (69.2%)       | 12 (54.5%)         | 10 (58.8%)                  |
| Stricturing                      | 2 (15.4%)       | 7 (31.8%)          | 3 (17.6%)                   |
| Penetrating                      | 2 (15.4%)       | 3 (13.6%)          | 4 (23.5%)                   |
| <b>Week 8</b>                    |                 |                    |                             |
| Age at Diagnosis: (years)        |                 |                    |                             |
| Below 16y                        | 1 (7.7%)        | 3 (13.6%)          | 1 (5.9%)                    |
| Between 17 and 40y               | 10 (76.9%)      | 13 (59.1%)         | 12 (70.6%)                  |
| Above 40y                        | 1 (7.7%)        | 5 (22.7%)          | 1 (5.9%)                    |
| Location:                        |                 |                    |                             |
| Ileal                            | 2 (15.4%)       | 3 (13.6%)          | 1 (5.9%)                    |
| Colonic                          | 4 (30.8%)       | 3 (13.6%)          | 5 (29.4%)                   |
| Ileocolonic                      | 4 (30.8%)       | 11 (50.0%)         | 8 (47.1%)                   |
| Isolated Upper Disease           | 2 (15.4%)       | 4 (18.2%)          | -                           |
| Behavior:                        |                 |                    |                             |

Abbreviations: ITT, Intent-to-Treat Analysis set; N, number of randomized subjects; n, number of subjects within each category.

Program Name: MUCUS-Shell116-V01  
 Output Location: .\Output\Shared\MUCUS-TFLS-Final-27MAR24-V01.pdf



Table 14.3.1.12: Summary of Montreal Classification Phenotype at Week 0, 8 ,16, 26, 36, 52

|                                  | Naive<br>(N=13) | Biologic<br>(N=22) | Multiple Biologic<br>(N=17) |
|----------------------------------|-----------------|--------------------|-----------------------------|
| Non-stricturing, non-penetrating | 8 (61.5%)       | 11 (50.0%)         | 8 (47.1%)                   |
| Stricturing                      | 1 (7.7%)        | 7 (31.8%)          | 4 (23.5%)                   |
| Penetrating                      | 3 (23.1%)       | 3 (13.6%)          | 2 (11.8%)                   |
| Week 16                          |                 |                    |                             |
| Age at Diagnosis: (years)        |                 |                    |                             |
| Below 16y                        | 1 (7.7%)        | 3 (13.6%)          | 1 (5.9%)                    |
| Between 17 and 40y               | 8 (61.5%)       | 12 (54.5%)         | 10 (58.8%)                  |
| Above 40y                        | -               | 4 (18.2%)          | 2 (11.8%)                   |
| Location:                        |                 |                    |                             |
| Ileal                            | 2 (15.4%)       | 2 (9.1%)           | 1 (5.9%)                    |
| Colonic                          | 3 (23.1%)       | 2 (9.1%)           | 4 (23.5%)                   |
| Ileocolonic                      | 3 (23.1%)       | 11 (50.0%)         | 7 (41.2%)                   |
| Isolated Upper Disease           | 1 (7.7%)        | 4 (18.2%)          | 1 (5.9%)                    |
| Behavior:                        |                 |                    |                             |
| Non-stricturing, non-penetrating | 6 (46.2%)       | 11 (50.0%)         | 8 (47.1%)                   |
| Stricturing                      | 1 (7.7%)        | 5 (22.7%)          | 2 (11.8%)                   |
| Penetrating                      | 2 (15.4%)       | 3 (13.6%)          | 3 (17.6%)                   |
| Week 26                          |                 |                    |                             |
| Age at Diagnosis: (years)        |                 |                    |                             |
| Below 16y                        | 1 (7.7%)        | 2 (9.1%)           | -                           |
| Between 17 and 40y               | 6 (46.2%)       | 8 (36.4%)          | 7 (41.2%)                   |
| Above 40y                        | -               | 3 (13.6%)          | -                           |
| Location:                        |                 |                    |                             |
| Ileal                            | 2 (15.4%)       | 2 (9.1%)           | -                           |
| Colonic                          | 2 (15.4%)       | 2 (9.1%)           | 3 (17.6%)                   |

Abbreviations: ITT, Intent-to-Treat Analysis set; N, number of randomized subjects; n, number of subjects within each category.

Table 14.3.1.12: Summary of Montreal Classification Phenotype at Week 0, 8 ,16, 26, 36, 52

|                                  | Naive<br>(N=13) | Biologic<br>(N=22) | Multiple Biologic<br>(N=17) |
|----------------------------------|-----------------|--------------------|-----------------------------|
| Ileocolonic                      | 3 (23.1%)       | 8 (36.4%)          | 4 (23.5%)                   |
| Isolated Upper Disease           | -               | 1 (4.5%)           | -                           |
| Behavior:                        |                 |                    |                             |
| Non-stricturing, non-penetrating | 5 (38.5%)       | 8 (36.4%)          | 5 (29.4%)                   |
| Stricturing                      | 1 (7.7%)        | 5 (22.7%)          | 2 (11.8%)                   |
| Penetrating                      | 1 (7.7%)        | -                  | -                           |
| Week 36                          |                 |                    |                             |
| Age at Diagnosis: (years)        |                 |                    |                             |
| Below 16y                        | 1 (7.7%)        | 2 (9.1%)           | -                           |
| Between 17 and 40y               | 6 (46.2%)       | 8 (36.4%)          | 9 (52.9%)                   |
| Above 40y                        | 1 (7.7%)        | -                  | -                           |
| Location:                        |                 |                    |                             |
| Ileal                            | 2 (15.4%)       | 1 (4.5%)           | 1 (5.9%)                    |
| Colonic                          | 3 (23.1%)       | 2 (9.1%)           | 4 (23.5%)                   |
| Ileocolonic                      | 2 (15.4%)       | 7 (31.8%)          | 4 (23.5%)                   |
| Isolated Upper Disease           | 1 (7.7%)        | -                  | -                           |
| Behavior:                        |                 |                    |                             |
| Non-stricturing, non-penetrating | 5 (38.5%)       | 7 (31.8%)          | 7 (41.2%)                   |
| Stricturing                      | 1 (7.7%)        | 3 (13.6%)          | 2 (11.8%)                   |
| Penetrating                      | 2 (15.4%)       | -                  | -                           |
| Week 52                          |                 |                    |                             |
| Age at Diagnosis: (years)        |                 |                    |                             |
| Below 16y                        | 1 (7.7%)        | 3 (13.6%)          | 1 (5.9%)                    |
| Between 17 and 40y               | 7 (53.8%)       | 11 (50.0%)         | 9 (52.9%)                   |
| Above 40y                        | 2 (15.4%)       | 3 (13.6%)          | 2 (11.8%)                   |

Abbreviations: ITT, Intent-to-Treat Analysis set; N, number of randomized subjects; n, number of subjects within each category.

Program Name: MUCUS-Shell116-V01

Output Location: .\Output\Shared\MUCUS-TFLS-Final-27MAR24-V01.pdf

Table 14.3.1.12: Summary of Montreal Classification Phenotype at Week 0, 8 ,16, 26, 36, 52

|                                  | Naive<br>(N=13) | Biologic<br>(N=22) | Multiple Biologic<br>(N=17) |
|----------------------------------|-----------------|--------------------|-----------------------------|
| Location:                        |                 |                    |                             |
| Ileal                            | 1 (7.7%)        | 3 (13.6%)          | 1 (5.9%)                    |
| Colonic                          | 3 (23.1%)       | 1 (4.5%)           | 5 (29.4%)                   |
| Ileocolonic                      | 5 (38.5%)       | 11 (50.0%)         | 5 (29.4%)                   |
| Isolated Upper Disease           | 1 (7.7%)        | 2 (9.1%)           | 1 (5.9%)                    |
| Behavior:                        |                 |                    |                             |
| Non-stricturing, non-penetrating | 8 (61.5%)       | 9 (40.9%)          | 7 (41.2%)                   |
| Stricturing                      | 1 (7.7%)        | 6 (27.3%)          | 2 (11.8%)                   |
| Penetrating                      | 1 (7.7%)        | 2 (9.1%)           | 3 (17.6%)                   |

Abbreviations: ITT, Intent-to-Treat Analysis set; N, number of randomized subjects; n, number of subjects within each category.

Program Name: MUCUS-Shell16-V01  
Output Location: .\Output\Shared\MUCUS-TFLS-Final-27MAR24-V01.pdf

Table 14.3.1.13: Summary of Extraintestinal Manifestations at Week 0, 8, 16, 26, 36, 52

|                                | Naive<br>(N=13) | Biologic<br>(N=22) | Multiple Biologic<br>(N=17) |
|--------------------------------|-----------------|--------------------|-----------------------------|
| <b>Baseline</b>                |                 |                    |                             |
| Extraintestinal Manifestations | 5 (38.5%)       | 5 (22.7%)          | 4 (23.5%)                   |
| Arthritis/ Arthralgia          | 5 (38.5%)       | 4 (18.2%)          | 4 (23.5%)                   |
| Iritis/ Uveitis                | 0 (0.0%)        | 0 (0.0%)           | 1 (5.9%)                    |
| Erythema nodosum               | 0 (0.0%)        | 1 (4.5%)           | 0 (0.0%)                    |
| Pyoderma gangrenosum           | 0 (0.0%)        | 0 (0.0%)           | 0 (0.0%)                    |
| Aphthous                       | 0 (0.0%)        | 0 (0.0%)           | 0 (0.0%)                    |
| <b>Week 8</b>                  |                 |                    |                             |
| Extraintestinal Manifestations | 3 (23.1%)       | 2 (9.1%)           | 3 (17.6%)                   |
| Arthritis/ Arthralgia          | 3 (23.1%)       | 2 (9.1%)           | 3 (17.6%)                   |
| Iritis/ Uveitis                | 0 (0.0%)        | 0 (0.0%)           | 0 (0.0%)                    |
| Erythema nodosum               | 0 (0.0%)        | 0 (0.0%)           | 0 (0.0%)                    |
| Pyoderma gangrenosum           | 0 (0.0%)        | 0 (0.0%)           | 0 (0.0%)                    |
| Aphthous                       | 0 (0.0%)        | 0 (0.0%)           | 0 (0.0%)                    |
| <b>Week 16</b>                 |                 |                    |                             |
| Extraintestinal Manifestations | 2 (15.4%)       | 3 (13.6%)          | 2 (11.8%)                   |
| Arthritis/ Arthralgia          | 2 (15.4%)       | 3 (13.6%)          | 2 (11.8%)                   |
| Iritis/ Uveitis                | 0 (0.0%)        | 0 (0.0%)           | 0 (0.0%)                    |
| Erythema nodosum               | 0 (0.0%)        | 0 (0.0%)           | 0 (0.0%)                    |
| Pyoderma gangrenosum           | 0 (0.0%)        | 0 (0.0%)           | 0 (0.0%)                    |
| Aphthous                       | 0 (0.0%)        | 0 (0.0%)           | 0 (0.0%)                    |
| <b>Week 26</b>                 |                 |                    |                             |
| Extraintestinal Manifestations | 3 (23.1%)       | 1 (4.5%)           | 1 (5.9%)                    |
| Arthritis/ Arthralgia          | 3 (23.1%)       | 1 (4.5%)           | 1 (5.9%)                    |
| Iritis/ Uveitis                | 0 (0.0%)        | 0 (0.0%)           | 0 (0.0%)                    |
| Erythema nodosum               | 0 (0.0%)        | 0 (0.0%)           | 0 (0.0%)                    |
| Pyoderma gangrenosum           | 0 (0.0%)        | 0 (0.0%)           | 0 (0.0%)                    |

Abbreviations: ITT, Intent-to-Treat Analysis set; N, number of randomized subjects; n, number of subjects within each category.

Table 14.3.1.13: Summary of Extraintestinal Manifestations at Week 0, 8 ,16, 26, 36, 52

|                                | Naive<br>(N=13) | Biologic<br>(N=22) | Multiple Biologic<br>(N=17) |
|--------------------------------|-----------------|--------------------|-----------------------------|
| Aphthous                       | 0 (0.0%)        | 0 (0.0%)           | 0 (0.0%)                    |
| Week 36                        |                 |                    |                             |
| Extraintestinal Manifestations | 2 (15.4%)       | 0 (0.0%)           | 1 (5.9%)                    |
| Arthritis/ Arthralgia          | 2 (15.4%)       | 0 (0.0%)           | 1 (5.9%)                    |
| Iritis/ Uveitis                | 0 (0.0%)        | 0 (0.0%)           | 0 (0.0%)                    |
| Erythema nodosum               | 0 (0.0%)        | 0 (0.0%)           | 0 (0.0%)                    |
| Pyoderma gangrenosum           | 0 (0.0%)        | 0 (0.0%)           | 0 (0.0%)                    |
| Aphthous                       | 0 (0.0%)        | 0 (0.0%)           | 0 (0.0%)                    |
| Week 52                        |                 |                    |                             |
| Extraintestinal Manifestations | 1 (7.7%)        | 1 (4.5%)           | 2 (11.8%)                   |
| Arthritis/ Arthralgia          | 1 (7.7%)        | 1 (4.5%)           | 2 (11.8%)                   |
| Iritis/ Uveitis                | 0 (0.0%)        | 0 (0.0%)           | 0 (0.0%)                    |
| Erythema nodosum               | 0 (0.0%)        | 0 (0.0%)           | 0 (0.0%)                    |
| Pyoderma gangrenosum           | 0 (0.0%)        | 0 (0.0%)           | 0 (0.0%)                    |
| Aphthous                       | 0 (0.0%)        | 0 (0.0%)           | 0 (0.0%)                    |

Abbreviations: ITT, Intent-to-Treat Analysis set; N, number of randomized subjects; n, number of subjects within each category.

Program Name: MUCUS-Shell117-V01  
 Output Location: .\Output\Shared\MUCUS-TFLS-Final-27MAR24-V01.pdf

Table 14.3.1.14: Summary of Crohn's Related Hospitalizations

|                                     | Naive<br>(N=13) | Biologic<br>(N=22) | Multiple Biologic<br>(N=17) |
|-------------------------------------|-----------------|--------------------|-----------------------------|
| Hospitalization                     |                 |                    |                             |
| Total Number of subjects with Event | -               | 2                  | -                           |
| Total Number of Events              | -               | 3                  | -                           |
| Event Rate (1st event)              | -               | 2 (9.1%)           | -                           |
| Mean time to 1st event (SD)         | -               | 85.5 (40.31)       | -                           |
| Median time to 1st event (Min, Max) | -               | 85.5 (57, 114)     | -                           |

Abbreviations: N, number of randomized subjects; n, number of subjects within each category.

Program Name: MUCUS-Shell9-V01

Output Location: .\Output\Shared\MUCUS-TFLS-Final-27MAR24-V01.pdf

Table 14.3.1.15: Summary of Crohn's Related Surgery

|                                     | Naive<br>(N=13)  | Biologic<br>(N=22) | Multiple Biologic<br>(N=17) |
|-------------------------------------|------------------|--------------------|-----------------------------|
| Surgery                             |                  |                    |                             |
| Total Number of subjects with Event | 1                | 2                  | -                           |
| Total Number of Events              | 1                | 3                  | -                           |
| Event Rate (1st event)              | 1 (7.7%)         | 2 (9.1%)           | -                           |
| Mean time to 1st event (SD)         | 374.0 (-)        | 207.5 (212.84)     | -                           |
| Median time to 1st event (Min, Max) | 374.0 (374, 374) | 207.5 (57, 358)    | -                           |

Abbreviations: N, number of randomized subjects; n, number of subjects within each category.

Program Name: MUCUS-Shell9-V01

Output Location: .\Output\Shared\MUCUS-TFLS-Final-27MAR24-V01.pdf

Table 14.3.5.1: Summary of Vital Signs

|                                      | Naive<br>(N=13) | Biologic<br>(N=22) | Multiple Biologic<br>(N=17) |
|--------------------------------------|-----------------|--------------------|-----------------------------|
| Body Mass Index (kg/M <sup>2</sup> ) |                 |                    |                             |
| Baseline: OBS                        |                 |                    |                             |
| N                                    | 8               | 15                 | 10                          |
| Missing                              | 5               | 7                  | 7                           |
| Mean (SD)                            | 23.9 (4.21)     | 24.5 (3.57)        | 24.3 (4.50)                 |
| Median (Min, Max)                    | 23.4 (18, 30)   | 23.7 (18, 32)      | 24.3 (17, 31)               |
| Week 8: OBS                          |                 |                    |                             |
| N                                    | 11              | 18                 | 14                          |
| Missing                              | 2               | 4                  | 3                           |
| Mean (SD)                            | 23.7 (3.87)     | 24.6 (3.87)        | 24.9 (4.22)                 |
| Median (Min, Max)                    | 23.2 (19, 29)   | 23.2 (20, 33)      | 23.8 (18, 32)               |
| Week 8: CHG                          |                 |                    |                             |
| N                                    | 8               | 13                 | 10                          |
| Missing                              | 5               | 9                  | 7                           |
| Mean (SD)                            | 0.3 (0.66)      | 0.2 (0.75)         | 0.4 (1.24)                  |
| Median (Min, Max)                    | 0.1 (-0, 1)     | 0.0 (-1, 2)        | 0.8 (-3, 2)                 |
| Week 8: PCHG                         |                 |                    |                             |
| N                                    | 8               | 13                 | 10                          |
| Missing                              | 5               | 9                  | 7                           |
| Mean (SD)                            | 1.7 (2.76)      | 1.1 (3.59)         | 2.1 (5.15)                  |
| Median (Min, Max)                    | 0.6 (-1, 5)     | 0.0 (-4, 10)       | 3.6 (-10, 8)                |
| Week 16: OBS                         |                 |                    |                             |
| N                                    | 8               | 17                 | 13                          |
| Missing                              | 5               | 5                  | 4                           |
| Mean (SD)                            | 24.0 (3.88)     | 24.9 (3.60)        | 24.5 (4.12)                 |
| Median (Min, Max)                    | 23.8 (18, 29)   | 24.7 (20, 32)      | 24.2 (19, 32)               |

Abbreviations: N, number of randomized subjects; n, number of subjects within each category; SD, Standard Deviation; Min, Minimum; Max, Maximum.

Program Name: MUCUS-Shell111-V01

Output Location: .\Output\Shared\MUCUS-TFLS-Final-27MAR24-V01.pdf



Table 14.3.5.1: Summary of Vital Signs

|                   | Naive<br>(N=13) | Biologic<br>(N=22) | Multiple Biologic<br>(N=17) |
|-------------------|-----------------|--------------------|-----------------------------|
| Week 16: CHG      |                 |                    |                             |
| N                 | 7               | 13                 | 9                           |
| Missing           | 6               | 9                  | 8                           |
| Mean (SD)         | 0.1 (0.57)      | 0.6 (1.39)         | 0.3 (1.78)                  |
| Median (Min, Max) | 0.3 (-1, 1)     | 0.0 (-2, 4)        | 1.0 (-3, 2)                 |
| Week 16: PCHG     |                 |                    |                             |
| N                 | 7               | 13                 | 9                           |
| Missing           | 6               | 9                  | 8                           |
| Mean (SD)         | 0.7 (2.41)      | 2.8 (5.82)         | 2.0 (7.78)                  |
| Median (Min, Max) | 1.2 (-2, 4)     | 0.0 (-5, 15)       | 4.7 (-13, 11)               |
| Week 26: OBS      |                 |                    |                             |
| N                 | 7               | 11                 | 6                           |
| Missing           | 6               | 11                 | 11                          |
| Mean (SD)         | 24.3 (3.66)     | 25.8 (3.80)        | 24.8 (2.94)                 |
| Median (Min, Max) | 22.1 (21, 30)   | 24.7 (22, 32)      | 24.3 (22, 30)               |
| Week 26: CHG      |                 |                    |                             |
| N                 | 6               | 8                  | 5                           |
| Missing           | 7               | 14                 | 12                          |
| Mean (SD)         | 0.4 (0.83)      | 0.7 (1.12)         | 1.3 (1.26)                  |
| Median (Min, Max) | 0.6 (-1, 1)     | 0.3 (-0, 3)        | 0.7 (0, 3)                  |
| Week 26: PCHG     |                 |                    |                             |
| N                 | 6               | 8                  | 5                           |
| Missing           | 7               | 14                 | 12                          |
| Mean (SD)         | 1.9 (3.67)      | 3.1 (4.52)         | 6.4 (6.26)                  |
| Median (Min, Max) | 2.5 (-4, 6)     | 1.2 (-1, 12)       | 3.1 (0, 13)                 |

Abbreviations: N, number of randomized subjects; n, number of subjects within each category; SD, Standard Deviation; Min, Minimum; Max, Maximum.

Program Name: MUCUS-Shell111-V01

Output Location: .\Output\Shared\MUCUS-TFLS-Final-27MAR24-V01.pdf

Table 14.3.5.1: Summary of Vital Signs

|                   | Naive<br>(N=13) | Biologic<br>(N=22) | Multiple Biologic<br>(N=17) |
|-------------------|-----------------|--------------------|-----------------------------|
| Week 36: OBS      |                 |                    |                             |
| N                 | 7               | 9                  | 9                           |
| Missing           | 6               | 13                 | 8                           |
| Mean (SD)         | 24.5 (3.93)     | 26.0 (3.41)        | 25.2 (3.88)                 |
| Median (Min, Max) | 23.0 (21, 32)   | 24.7 (21, 32)      | 24.9 (20, 32)               |
| Week 36: CHG      |                 |                    |                             |
| N                 | 7               | 8                  | 7                           |
| Missing           | 6               | 14                 | 10                          |
| Mean (SD)         | 1.1 (1.24)      | 0.8 (1.49)         | 1.3 (1.65)                  |
| Median (Min, Max) | 1.2 (-1, 3)     | 0.1 (-0, 4)        | 1.4 (-2, 3)                 |
| Week 36: PCHG     |                 |                    |                             |
| N                 | 7               | 8                  | 7                           |
| Missing           | 6               | 14                 | 10                          |
| Mean (SD)         | 5.1 (5.92)      | 3.4 (6.11)         | 5.6 (7.16)                  |
| Median (Min, Max) | 5.9 (-4, 15)    | 0.5 (-1, 17)       | 5.6 (-8, 16)                |
| Week 52: OBS      |                 |                    |                             |
| N                 | 8               | 11                 | 10                          |
| Missing           | 5               | 11                 | 7                           |
| Mean (SD)         | 24.1 (3.70)     | 24.2 (2.95)        | 25.3 (4.15)                 |
| Median (Min, Max) | 22.0 (20, 29)   | 23.4 (20, 29)      | 25.0 (20, 34)               |
| Week 52: CHG      |                 |                    |                             |
| N                 | 6               | 9                  | 9                           |
| Missing           | 7               | 13                 | 8                           |
| Mean (SD)         | 0.5 (1.33)      | 0.6 (1.91)         | 1.6 (2.07)                  |
| Median (Min, Max) | 0.4 (-1, 2)     | 0.4 (-3, 4)        | 0.7 (-1, 5)                 |

Abbreviations: N, number of randomized subjects; n, number of subjects within each category; SD, Standard Deviation; Min, Minimum; Max, Maximum.

Table 14.3.5.1: Summary of Vital Signs

|                         | Naive<br>(N=13) | Biologic<br>(N=22) | Multiple Biologic<br>(N=17) |
|-------------------------|-----------------|--------------------|-----------------------------|
| Week 52: PCHG           |                 |                    |                             |
| N                       | 6               | 9                  | 9                           |
| Missing                 | 7               | 13                 | 8                           |
| Mean (SD)               | 3.1 (6.66)      | 2.5 (7.84)         | 7.8 (11.01)                 |
| Median (Min, Max)       | 1.9 (-5, 13)    | 1.8 (-13, 17)      | 3.1 (-2, 32)                |
| Early Termination: OBS  |                 |                    |                             |
| N                       | 0               | 2                  | 2                           |
| Missing                 | -               | -                  | -                           |
| Mean (SD)               | -               | 24.7 (2.61)        | 24.9 (6.86)                 |
| Median (Min, Max)       | -               | 24.7 (23, 27)      | 24.9 (20, 30)               |
| Early Termination: CHG  |                 |                    |                             |
| N                       | 0               | 2                  | 0                           |
| Missing                 | -               | -                  | -                           |
| Mean (SD)               | -               | 0.0 (0.00)         | -                           |
| Median (Min, Max)       | -               | 0.0 (0, 0)         | -                           |
| Early Termination: PCHG |                 |                    |                             |
| N                       | 0               | 2                  | 0                           |
| Missing                 | -               | -                  | -                           |
| Mean (SD)               | -               | 0.0 (0.00)         | -                           |
| Median (Min, Max)       | -               | 0.0 (0, 0)         | -                           |
| Disease Flare: OBS      |                 |                    |                             |
| N                       | 0               | 0                  | 0                           |
| Missing                 | -               | -                  | -                           |
| Mean (SD)               | -               | -                  | -                           |
| Median (Min, Max)       | -               | -                  | -                           |

Abbreviations: N, number of randomized subjects; n, number of subjects within each category; SD, Standard Deviation; Min, Minimum; Max, Maximum.

Table 14.3.5.1: Summary of Vital Signs

|                        | Naive<br>(N=13) | Biologic<br>(N=22) | Multiple Biologic<br>(N=17) |
|------------------------|-----------------|--------------------|-----------------------------|
| Disease Flare: CHG     |                 |                    |                             |
| N                      | 0               | 0                  | 0                           |
| Missing                | -               | -                  | -                           |
| Mean (SD)              | -               | -                  | -                           |
| Median (Min, Max)      | -               | -                  | -                           |
| Disease Flare: PCHG    |                 |                    |                             |
| N                      | 0               | 0                  | 0                           |
| Missing                | -               | -                  | -                           |
| Mean (SD)              | -               | -                  | -                           |
| Median (Min, Max)      | -               | -                  | -                           |
| Safety Follow-Up: OBS  |                 |                    |                             |
| N                      | 6               | 8                  | 9                           |
| Missing                | 7               | 14                 | 8                           |
| Mean (SD)              | 23.2 (2.95)     | 23.4 (2.77)        | 27.8 (3.37)                 |
| Median (Min, Max)      | 21.9 (20, 27)   | 22.7 (21, 29)      | 27.3 (24, 35)               |
| Safety Follow-Up: CHG  |                 |                    |                             |
| N                      | 5               | 6                  | 6                           |
| Missing                | 8               | 16                 | 11                          |
| Mean (SD)              | 0.5 (1.41)      | -0.2 (1.55)        | 2.5 (2.71)                  |
| Median (Min, Max)      | 0.8 (-1, 2)     | 0.2 (-3, 1)        | 1.5 (0, 8)                  |
| Safety Follow-Up: PCHG |                 |                    |                             |
| N                      | 5               | 6                  | 6                           |
| Missing                | 8               | 16                 | 11                          |
| Mean (SD)              | 3.3 (6.78)      | -0.8 (6.18)        | 11.8 (16.54)                |
| Median (Min, Max)      | 3.8 (-5, 13)    | 0.7 (-13, 5)       | 6.1 (0, 45)                 |

Abbreviations: N, number of randomized subjects; n, number of subjects within each category; SD, Standard Deviation; Min, Minimum; Max, Maximum.

Program Name: MUCUS-Shell111-V01

Output Location: .\Output\Shared\MUCUS-TFLS-Final-27MAR24-V01.pdf

Table 14.3.5.1: Summary of Vital Signs

|                                 | Naive<br>(N=13) | Biologic<br>(N=22) | Multiple Biologic<br>(N=17) |
|---------------------------------|-----------------|--------------------|-----------------------------|
| Diastolic Blood Pressure (mmHg) |                 |                    |                             |
| Baseline: OBS                   |                 |                    |                             |
| N                               | 9               | 17                 | 11                          |
| Missing                         | 4               | 5                  | 6                           |
| Mean (SD)                       | 73.6 (12.37)    | 83.6 (14.09)       | 77.9 (7.62)                 |
| Median (Min, Max)               | 70.0 (58, 94)   | 83.0 (60, 114)     | 76.0 (68, 92)               |
| Week 8: OBS                     |                 |                    |                             |
| N                               | 12              | 19                 | 13                          |
| Missing                         | 1               | 3                  | 4                           |
| Mean (SD)                       | 81.1 (11.31)    | 80.7 (8.60)        | 78.2 (8.08)                 |
| Median (Min, Max)               | 79.0 (67, 105)  | 83.0 (69, 99)      | 78.0 (67, 91)               |
| Week 8: CHG                     |                 |                    |                             |
| N                               | 9               | 15                 | 9                           |
| Missing                         | 4               | 7                  | 8                           |
| Mean (SD)                       | 5.6 (6.88)      | 0.4 (10.21)        | 2.6 (9.06)                  |
| Median (Min, Max)               | 9.0 (-5, 16)    | 1.0 (-14, 22)      | 0.0 (-10, 19)               |
| Week 8: PCHG                    |                 |                    |                             |
| N                               | 9               | 15                 | 9                           |
| Missing                         | 4               | 7                  | 8                           |
| Mean (SD)                       | 8.6 (10.41)     | 2.0 (13.87)        | 3.7 (12.31)                 |
| Median (Min, Max)               | 13.3 (-6, 26)   | 1.1 (-14, 35)      | 0.0 (-12, 28)               |
| Week 16: OBS                    |                 |                    |                             |
| N                               | 9               | 18                 | 13                          |
| Missing                         | 4               | 4                  | 4                           |
| Mean (SD)                       | 81.8 (10.66)    | 81.3 (6.89)        | 78.9 (8.78)                 |

Abbreviations: N, number of randomized subjects; n, number of subjects within each category; SD, Standard Deviation; Min, Minimum; Max, Maximum.

Program Name: MUCUS-Shell111-V01

Output Location: .\Output\Shared\MUCUS-TFLS-Final-27MAR24-V01.pdf

Table 14.3.5.1: Summary of Vital Signs

|                   | Naive<br>(N=13) | Biologic<br>(N=22) | Multiple Biologic<br>(N=17) |
|-------------------|-----------------|--------------------|-----------------------------|
| Median (Min, Max) | 80.0 (70, 105)  | 81.0 (70, 95)      | 79.0 (63, 93)               |
| Week 16: CHG      |                 |                    |                             |
| N                 | 8               | 14                 | 9                           |
| Missing           | 5               | 8                  | 8                           |
| Mean (SD)         | 6.1 (6.66)      | -1.2 (10.67)       | 1.3 (7.94)                  |
| Median (Min, Max) | 5.0 (0, 20)     | -3.0 (-16, 15)     | 0.0 (-11, 16)               |
| Week 16: PCHG     |                 |                    |                             |
| N                 | 8               | 14                 | 9                           |
| Missing           | 5               | 8                  | 8                           |
| Mean (SD)         | 8.7 (10.38)     | 0.2 (13.42)        | 2.0 (10.09)                 |
| Median (Min, Max) | 7.2 (0, 32)     | -3.6 (-16, 20)     | 0.0 (-13, 21)               |
| Week 26: OBS      |                 |                    |                             |
| N                 | 7               | 13                 | 6                           |
| Missing           | 6               | 9                  | 11                          |
| Mean (SD)         | 74.9 (8.69)     | 84.8 (15.25)       | 74.0 (2.97)                 |
| Median (Min, Max) | 70.0 (67, 90)   | 80.0 (72, 130)     | 75.0 (70, 78)               |
| Week 26: CHG      |                 |                    |                             |
| N                 | 6               | 10                 | 5                           |
| Missing           | 7               | 12                 | 12                          |
| Mean (SD)         | 1.5 (2.74)      | 2.4 (17.48)        | -4.2 (5.72)                 |
| Median (Min, Max) | 0.0 (-1, 5)     | 0.5 (-21, 35)      | -5.0 (-11, 3)               |
| Week 26: PCHG     |                 |                    |                             |
| N                 | 6               | 10                 | 5                           |
| Missing           | 7               | 12                 | 12                          |
| Mean (SD)         | 2.1 (3.95)      | 4.4 (19.92)        | -4.9 (6.89)                 |

Abbreviations: N, number of randomized subjects; n, number of subjects within each category; SD, Standard Deviation; Min, Minimum; Max, Maximum.

Table 14.3.5.1: Summary of Vital Signs

|                   | Naive<br>(N=13) | Biologic<br>(N=22) | Multiple Biologic<br>(N=17) |
|-------------------|-----------------|--------------------|-----------------------------|
| Median (Min, Max) | 0.0 (-1, 8)     | 1.9 (-22, 37)      | -6.3 (-13, 4)               |
| Week 36: OBS      |                 |                    |                             |
| N                 | 7               | 9                  | 8                           |
| Missing           | 6               | 13                 | 9                           |
| Mean (SD)         | 69.1 (7.95)     | 83.4 (6.13)        | 78.8 (6.94)                 |
| Median (Min, Max) | 69.0 (57, 80)   | 84.0 (73, 93)      | 80.0 (70, 90)               |
| Week 36: CHG      |                 |                    |                             |
| N                 | 7               | 8                  | 6                           |
| Missing           | 6               | 14                 | 11                          |
| Mean (SD)         | -3.1 (7.99)     | 3.0 (14.54)        | 1.0 (8.29)                  |
| Median (Min, Max) | -1.0 (-15, 10)  | 6.0 (-28, 18)      | 0.0 (-8, 15)                |
| Week 36: PCHG     |                 |                    |                             |
| N                 | 7               | 8                  | 6                           |
| Missing           | 6               | 14                 | 11                          |
| Mean (SD)         | -3.6 (10.42)    | 6.2 (17.72)        | 1.7 (10.67)                 |
| Median (Min, Max) | -1.7 (-19, 15)  | 7.4 (-28, 28)      | 0.0 (-10, 20)               |
| Week 52: OBS      |                 |                    |                             |
| N                 | 9               | 13                 | 10                          |
| Missing           | 4               | 9                  | 7                           |
| Mean (SD)         | 74.3 (11.97)    | 85.6 (22.92)       | 79.7 (10.93)                |
| Median (Min, Max) | 71.0 (60, 100)  | 81.0 (69, 158)     | 80.0 (61, 96)               |
| Week 52: CHG      |                 |                    |                             |
| N                 | 7               | 11                 | 9                           |
| Missing           | 6               | 11                 | 8                           |
| Mean (SD)         | 3.9 (9.55)      | 5.5 (23.79)        | 1.3 (11.94)                 |

Abbreviations: N, number of randomized subjects; n, number of subjects within each category; SD, Standard Deviation; Min, Minimum; Max, Maximum.

Program Name: MUCUS-Shell111-V01

Output Location: .\Output\Shared\MUCUS-TFLS-Final-27MAR24-V01.pdf

Table 14.3.5.1: Summary of Vital Signs

|                         | Naive<br>(N=13) | Biologic<br>(N=22) | Multiple Biologic<br>(N=17) |
|-------------------------|-----------------|--------------------|-----------------------------|
| Median (Min, Max)       | 2.0 (-10, 21)   | 3.0 (-26, 63)      | 2.0 (-19, 20)               |
| Week 52: PCHG           |                 |                    |                             |
| N                       | 7               | 11                 | 9                           |
| Missing                 | 6               | 11                 | 8                           |
| Mean (SD)               | 6.5 (14.44)     | 8.1 (26.04)        | 2.3 (15.57)                 |
| Median (Min, Max)       | 3.1 (-13, 34)   | 3.8 (-26, 66)      | 2.2 (-24, 26)               |
| Early Termination: OBS  |                 |                    |                             |
| N                       | 0               | 2                  | 2                           |
| Missing                 | -               | -                  | -                           |
| Mean (SD)               | -               | 84.5 (3.54)        | 85.0 (0.00)                 |
| Median (Min, Max)       | -               | 84.5 (82, 87)      | 85.0 (85, 85)               |
| Early Termination: CHG  |                 |                    |                             |
| N                       | 0               | 2                  | 0                           |
| Missing                 | -               | -                  | -                           |
| Mean (SD)               | -               | 1.0 (8.49)         | -                           |
| Median (Min, Max)       | -               | 1.0 (-5, 7)        | -                           |
| Early Termination: PCHG |                 |                    |                             |
| N                       | 0               | 2                  | 0                           |
| Missing                 | -               | -                  | -                           |
| Mean (SD)               | -               | 1.5 (10.25)        | -                           |
| Median (Min, Max)       | -               | 1.5 (-6, 9)        | -                           |
| Disease Flare: OBS      |                 |                    |                             |
| N                       | 0               | 0                  | 0                           |
| Missing                 | -               | -                  | -                           |
| Mean (SD)               | -               | -                  | -                           |

Abbreviations: N, number of randomized subjects; n, number of subjects within each category; SD, Standard Deviation; Min, Minimum; Max, Maximum.



Table 14.3.5.1: Summary of Vital Signs

|                        | Naive<br>(N=13) | Biologic<br>(N=22) | Multiple Biologic<br>(N=17) |
|------------------------|-----------------|--------------------|-----------------------------|
| Median (Min, Max)      | -               | -                  | -                           |
| Disease Flare: CHG     |                 |                    |                             |
| N                      | 0               | 0                  | 0                           |
| Missing                | -               | -                  | -                           |
| Mean (SD)              | -               | -                  | -                           |
| Median (Min, Max)      | -               | -                  | -                           |
| Disease Flare: PCHG    |                 |                    |                             |
| N                      | 0               | 0                  | 0                           |
| Missing                | -               | -                  | -                           |
| Mean (SD)              | -               | -                  | -                           |
| Median (Min, Max)      | -               | -                  | -                           |
| Safety Follow-Up: OBS  |                 |                    |                             |
| N                      | 7               | 8                  | 9                           |
| Missing                | 6               | 14                 | 8                           |
| Mean (SD)              | 77.0 (16.83)    | 82.5 (10.81)       | 80.4 (8.65)                 |
| Median (Min, Max)      | 75.0 (54, 107)  | 84.0 (66, 96)      | 80.0 (67, 91)               |
| Safety Follow-Up: CHG  |                 |                    |                             |
| N                      | 6               | 6                  | 6                           |
| Missing                | 7               | 16                 | 11                          |
| Mean (SD)              | 6.0 (8.76)      | 2.2 (11.89)        | 1.2 (13.26)                 |
| Median (Min, Max)      | 5.0 (-4, 19)    | 2.0 (-18, 15)      | -6.0 (-10, 21)              |
| Safety Follow-Up: PCHG |                 |                    |                             |
| N                      | 6               | 6                  | 6                           |
| Missing                | 7               | 16                 | 11                          |
| Mean (SD)              | 8.2 (13.33)     | 4.0 (15.47)        | 2.6 (17.88)                 |

Abbreviations: N, number of randomized subjects; n, number of subjects within each category; SD, Standard Deviation; Min, Minimum; Max, Maximum.

Program Name: MUCUS-Shell111-V01

Output Location: .\Output\Shared\MUCUS-TFLS-Final-27MAR24-V01.pdf

Table 14.3.5.1: Summary of Vital Signs

|                        | Naive<br>(N=13)  | Biologic<br>(N=22) | Multiple Biologic<br>(N=17) |
|------------------------|------------------|--------------------|-----------------------------|
| Median (Min, Max)      | 7.4 (-7, 31)     | 2.2 (-20, 25)      | -6.9 (-13, 30)              |
| Height (cm)            |                  |                    |                             |
| Baseline: OBS          |                  |                    |                             |
| N                      | 12               | 20                 | 16                          |
| Missing                | 1                | 2                  | 1                           |
| Mean (SD)              | 173.3 (14.89)    | 171.3 (10.61)      | 173.5 (7.80)                |
| Median (Min, Max)      | 169.0 (147, 195) | 169.0 (157, 192)   | 172.0 (161, 195)            |
| Pulse Rate (beats/min) |                  |                    |                             |
| Baseline: OBS          |                  |                    |                             |
| N                      | 9                | 17                 | 11                          |
| Missing                | 4                | 5                  | 6                           |
| Mean (SD)              | 79.4 (18.04)     | 78.4 (9.38)        | 80.4 (9.46)                 |
| Median (Min, Max)      | 75.0 (62, 111)   | 78.0 (62, 97)      | 80.0 (67, 96)               |
| Week 8: OBS            |                  |                    |                             |
| N                      | 12               | 19                 | 13                          |
| Missing                | 1                | 3                  | 4                           |
| Mean (SD)              | 79.6 (11.67)     | 79.2 (15.48)       | 78.5 (9.58)                 |
| Median (Min, Max)      | 80.0 (62, 98)    | 77.0 (56, 120)     | 77.0 (68, 107)              |
| Week 8: CHG            |                  |                    |                             |
| N                      | 9                | 15                 | 9                           |
| Missing                | 4                | 7                  | 8                           |
| Mean (SD)              | -2.9 (17.40)     | 4.9 (16.94)        | -0.8 (12.70)                |
| Median (Min, Max)      | 4.0 (-30, 16)    | 0.0 (-16, 37)      | 0.0 (-24, 23)               |
| Week 8: PCHG           |                  |                    |                             |
| N                      | 9                | 15                 | 9                           |

Abbreviations: N, number of randomized subjects; n, number of subjects within each category; SD, Standard Deviation; Min, Minimum; Max, Maximum.

Program Name: MUCUS-Shell111-V01

Output Location: .\Output\Shared\MUCUS-TFLS-Final-27MAR24-V01.pdf

Table 14.3.5.1: Summary of Vital Signs

|                   | Naive<br>(N=13) | Biologic<br>(N=22) | Multiple Biologic<br>(N=17) |
|-------------------|-----------------|--------------------|-----------------------------|
| Missing           | 4               | 7                  | 8                           |
| Mean (SD)         | -0.3 (19.94)    | 7.3 (22.52)        | -0.1 (14.30)                |
| Median (Min, Max) | 6.3 (-27, 25)   | 0.0 (-19, 50)      | 0.0 (-25, 27)               |
| Week 16: OBS      |                 |                    |                             |
| N                 | 9               | 18                 | 13                          |
| Missing           | 4               | 4                  | 4                           |
| Mean (SD)         | 71.7 (12.56)    | 78.8 (10.43)       | 75.9 (6.42)                 |
| Median (Min, Max) | 68.0 (61, 102)  | 79.0 (55, 101)     | 76.0 (67, 86)               |
| Week 16: CHG      |                 |                    |                             |
| N                 | 8               | 14                 | 9                           |
| Missing           | 5               | 8                  | 8                           |
| Mean (SD)         | -4.5 (21.79)    | -1.4 (11.63)       | -2.7 (11.26)                |
| Median (Min, Max) | -4.5 (-44, 27)  | -3.0 (-17, 24)     | 0.0 (-28, 11)               |
| Week 16: PCHG     |                 |                    |                             |
| N                 | 8               | 14                 | 9                           |
| Missing           | 5               | 8                  | 8                           |
| Mean (SD)         | -2.7 (25.06)    | -1.1 (14.94)       | -2.1 (12.77)                |
| Median (Min, Max) | -6.4 (-40, 36)  | -3.9 (-18, 31)     | 0.0 (-29, 16)               |
| Week 26: OBS      |                 |                    |                             |
| N                 | 7               | 13                 | 6                           |
| Missing           | 6               | 9                  | 11                          |
| Mean (SD)         | 68.1 (10.62)    | 76.2 (7.88)        | 75.8 (3.25)                 |
| Median (Min, Max) | 68.0 (55, 86)   | 76.0 (63, 91)      | 76.5 (72, 80)               |
| Week 26: CHG      |                 |                    |                             |
| N                 | 6               | 10                 | 5                           |

Abbreviations: N, number of randomized subjects; n, number of subjects within each category; SD, Standard Deviation; Min, Minimum; Max, Maximum.

Program Name: MUCUS-Shell111-V01

Output Location: .\Output\Shared\MUCUS-TFLS-Final-27MAR24-V01.pdf

Table 14.3.5.1: Summary of Vital Signs

|                   | Naive<br>(N=13) | Biologic<br>(N=22) | Multiple Biologic<br>(N=17) |
|-------------------|-----------------|--------------------|-----------------------------|
| Missing           | 7               | 12                 | 12                          |
| Mean (SD)         | -1.0 (14.00)    | -2.5 (9.10)        | -5.6 (8.17)                 |
| Median (Min, Max) | 2.0 (-22, 14)   | 0.5 (-19, 8)       | -2.0 (-16, 4)               |
| Week 26: PCHG     |                 |                    |                             |
| N                 | 6               | 10                 | 5                           |
| Missing           | 7               | 12                 | 12                          |
| Mean (SD)         | 0.1 (18.79)     | -2.7 (10.85)       | -6.1 (9.22)                 |
| Median (Min, Max) | 3.1 (-28, 23)   | 0.6 (-20, 12)      | -2.5 (-17, 6)               |
| Week 36: OBS      |                 |                    |                             |
| N                 | 7               | 9                  | 8                           |
| Missing           | 6               | 13                 | 9                           |
| Mean (SD)         | 67.4 (11.37)    | 77.9 (8.57)        | 79.1 (7.85)                 |
| Median (Min, Max) | 66.0 (54, 88)   | 80.0 (65, 89)      | 78.5 (68, 96)               |
| Week 36: CHG      |                 |                    |                             |
| N                 | 7               | 8                  | 6                           |
| Missing           | 6               | 14                 | 11                          |
| Mean (SD)         | -8.9 (16.39)    | 4.5 (9.50)         | 1.7 (14.56)                 |
| Median (Min, Max) | -9.0 (-37, 13)  | 3.5 (-12, 21)      | -1.0 (-16, 28)              |
| Week 36: PCHG     |                 |                    |                             |
| N                 | 7               | 8                  | 6                           |
| Missing           | 6               | 14                 | 11                          |
| Mean (SD)         | -9.5 (18.75)    | 6.9 (14.27)        | 3.8 (19.73)                 |
| Median (Min, Max) | -12.0 (-35, 21) | 4.6 (-16, 34)      | -1.3 (-17, 41)              |
| Week 52: OBS      |                 |                    |                             |
| N                 | 9               | 13                 | 10                          |

Abbreviations: N, number of randomized subjects; n, number of subjects within each category; SD, Standard Deviation; Min, Minimum; Max, Maximum.

Program Name: MUCUS-Shell111-V01

Output Location: .\Output\Shared\MUCUS-TFLS-Final-27MAR24-V01.pdf

Table 14.3.5.1: Summary of Vital Signs

|                         | Naive<br>(N=13) | Biologic<br>(N=22) | Multiple Biologic<br>(N=17) |
|-------------------------|-----------------|--------------------|-----------------------------|
| Missing                 | 4               | 9                  | 7                           |
| Mean (SD)               | 68.7 (10.44)    | 74.8 (13.38)       | 77.2 (10.52)                |
| Median (Min, Max)       | 67.0 (56, 88)   | 74.0 (45, 101)     | 76.0 (63, 94)               |
| Week 52: CHG            |                 |                    |                             |
| N                       | 7               | 11                 | 9                           |
| Missing                 | 6               | 11                 | 8                           |
| Mean (SD)               | -7.1 (15.76)    | -1.5 (11.52)       | -2.3 (16.69)                |
| Median (Min, Max)       | -3.0 (-39, 12)  | -3.0 (-23, 21)     | 0.0 (-24, 27)               |
| Week 52: PCHG           |                 |                    |                             |
| N                       | 7               | 11                 | 9                           |
| Missing                 | 6               | 11                 | 8                           |
| Mean (SD)               | -7.1 (16.84)    | -1.4 (13.61)       | -1.0 (21.40)                |
| Median (Min, Max)       | -4.8 (-37, 19)  | -3.5 (-24, 26)     | 0.0 (-25, 40)               |
| Early Termination: OBS  |                 |                    |                             |
| N                       | 0               | 2                  | 2                           |
| Missing                 | -               | -                  | -                           |
| Mean (SD)               | -               | 80.0 (14.14)       | 84.5 (12.02)                |
| Median (Min, Max)       | -               | 80.0 (70, 90)      | 84.5 (76, 93)               |
| Early Termination: CHG  |                 |                    |                             |
| N                       | 0               | 2                  | 0                           |
| Missing                 | -               | -                  | -                           |
| Mean (SD)               | -               | -3.0 (4.24)        | -                           |
| Median (Min, Max)       | -               | -3.0 (-6, 0)       | -                           |
| Early Termination: PCHG |                 |                    |                             |
| N                       | 0               | 2                  | 0                           |

Abbreviations: N, number of randomized subjects; n, number of subjects within each category; SD, Standard Deviation; Min, Minimum; Max, Maximum.

Program Name: MUCUS-Shell111-V01

Output Location: .\Output\Shared\MUCUS-TFLS-Final-27MAR24-V01.pdf

Table 14.3.5.1: Summary of Vital Signs

|                       | Naive<br>(N=13) | Biologic<br>(N=22) | Multiple Biologic<br>(N=17) |
|-----------------------|-----------------|--------------------|-----------------------------|
| Missing               | -               | -                  | -                           |
| Mean (SD)             | -               | -3.9 (5.58)        | -                           |
| Median (Min, Max)     | -               | -3.9 (-8, 0)       | -                           |
| Disease Flare: OBS    |                 |                    |                             |
| N                     | 0               | 0                  | 0                           |
| Missing               | -               | -                  | -                           |
| Mean (SD)             | -               | -                  | -                           |
| Median (Min, Max)     | -               | -                  | -                           |
| Disease Flare: CHG    |                 |                    |                             |
| N                     | 0               | 0                  | 0                           |
| Missing               | -               | -                  | -                           |
| Mean (SD)             | -               | -                  | -                           |
| Median (Min, Max)     | -               | -                  | -                           |
| Disease Flare: PCHG   |                 |                    |                             |
| N                     | 0               | 0                  | 0                           |
| Missing               | -               | -                  | -                           |
| Mean (SD)             | -               | -                  | -                           |
| Median (Min, Max)     | -               | -                  | -                           |
| Safety Follow-Up: OBS |                 |                    |                             |
| N                     | 7               | 8                  | 9                           |
| Missing               | 6               | 14                 | 8                           |
| Mean (SD)             | 70.4 (6.90)     | 76.3 (3.92)        | 76.0 (7.40)                 |
| Median (Min, Max)     | 73.0 (60, 78)   | 76.5 (71, 83)      | 76.0 (66, 90)               |
| Safety Follow-Up: CHG |                 |                    |                             |
| N                     | 6               | 6                  | 6                           |

Abbreviations: N, number of randomized subjects; n, number of subjects within each category; SD, Standard Deviation; Min, Minimum; Max, Maximum.

Table 14.3.5.1: Summary of Vital Signs

|                                | Naive<br>(N=13)  | Biologic<br>(N=22) | Multiple Biologic<br>(N=17) |
|--------------------------------|------------------|--------------------|-----------------------------|
| Missing                        | 7                | 16                 | 11                          |
| Mean (SD)                      | -14.8 (22.85)    | -1.7 (8.45)        | -7.7 (12.44)                |
| Median (Min, Max)              | -5.0 (-46, 5)    | -1.0 (-12, 12)     | -12.0 (-20, 15)             |
| Safety Follow-Up: PCHG         |                  |                    |                             |
| N                              | 6                | 6                  | 6                           |
| Missing                        | 7                | 16                 | 11                          |
| Mean (SD)                      | -13.5 (21.72)    | -1.2 (11.87)       | -7.8 (15.80)                |
| Median (Min, Max)              | -6.0 (-43, 7)    | -1.3 (-14, 19)     | -13.8 (-21, 22)             |
| Systolic Blood Pressure (mmHg) |                  |                    |                             |
| Baseline: OBS                  |                  |                    |                             |
| N                              | 9                | 17                 | 11                          |
| Missing                        | 4                | 5                  | 6                           |
| Mean (SD)                      | 114.9 (20.15)    | 126.7 (17.64)      | 124.2 (20.18)               |
| Median (Min, Max)              | 120.0 (76, 147)  | 121.0 (105, 168)   | 120.0 (106, 182)            |
| Week 8: OBS                    |                  |                    |                             |
| N                              | 12               | 19                 | 13                          |
| Missing                        | 1                | 3                  | 4                           |
| Mean (SD)                      | 129.1 (17.52)    | 122.5 (14.34)      | 121.8 (8.24)                |
| Median (Min, Max)              | 129.0 (100, 156) | 125.0 (99, 155)    | 122.0 (105, 136)            |
| Week 8: CHG                    |                  |                    |                             |
| N                              | 9                | 15                 | 9                           |
| Missing                        | 4                | 7                  | 8                           |
| Mean (SD)                      | 11.6 (10.26)     | 1.3 (7.64)         | 3.0 (11.12)                 |
| Median (Min, Max)              | 9.0 (-2, 27)     | 0.0 (-11, 22)      | 0.0 (-5, 30)                |
| Week 8: PCHG                   |                  |                    |                             |

Abbreviations: N, number of randomized subjects; n, number of subjects within each category; SD, Standard Deviation; Min, Minimum; Max, Maximum.

Program Name: MUCUS-Shell111-V01

Output Location: .\Output\Shared\MUCUS-TFLS-Final-27MAR24-V01.pdf

Table 14.3.5.1: Summary of Vital Signs

|                   | Naive<br>(N=13)  | Biologic<br>(N=22) | Multiple Biologic<br>(N=17) |
|-------------------|------------------|--------------------|-----------------------------|
| N                 | 9                | 15                 | 9                           |
| Missing           | 4                | 7                  | 8                           |
| Mean (SD)         | 11.5 (11.66)     | 1.3 (6.74)         | 2.8 (10.27)                 |
| Median (Min, Max) | 7.4 (-2, 32)     | 0.0 (-10, 20)      | 0.0 (-5, 28)                |
| Week 16: OBS      |                  |                    |                             |
| N                 | 9                | 18                 | 13                          |
| Missing           | 4                | 4                  | 4                           |
| Mean (SD)         | 125.7 (17.39)    | 127.2 (12.95)      | 123.6 (11.40)               |
| Median (Min, Max) | 121.0 (112, 166) | 126.0 (112, 162)   | 123.0 (103, 146)            |
| Week 16: CHG      |                  |                    |                             |
| N                 | 8                | 14                 | 9                           |
| Missing           | 5                | 8                  | 8                           |
| Mean (SD)         | 6.5 (13.75)      | 1.2 (11.25)        | -2.6 (21.01)                |
| Median (Min, Max) | 0.0 (-9, 28)     | 3.0 (-23, 17)      | 0.0 (-54, 20)               |
| Week 16: PCHG     |                  |                    |                             |
| N                 | 8                | 14                 | 9                           |
| Missing           | 5                | 8                  | 8                           |
| Mean (SD)         | 5.9 (12.83)      | 1.7 (8.56)         | -0.4 (12.99)                |
| Median (Min, Max) | 0.0 (-7, 30)     | 2.6 (-15, 16)      | 0.0 (-30, 16)               |
| Week 26: OBS      |                  |                    |                             |
| N                 | 7                | 13                 | 6                           |
| Missing           | 6                | 9                  | 11                          |
| Mean (SD)         | 122.0 (9.93)     | 129.4 (21.76)      | 114.5 (6.25)                |
| Median (Min, Max) | 120.0 (110, 140) | 125.0 (110, 192)   | 115.0 (105, 121)            |
| Week 26: CHG      |                  |                    |                             |

Abbreviations: N, number of randomized subjects; n, number of subjects within each category; SD, Standard Deviation; Min, Minimum; Max, Maximum.

Program Name: MUCUS-Shell111-V01

Output Location: .\Output\Shared\MUCUS-TFLS-Final-27MAR24-V01.pdf



Table 14.3.5.1: Summary of Vital Signs

|                   | Naive<br>(N=13) | Biologic<br>(N=22) | Multiple Biologic<br>(N=17) |
|-------------------|-----------------|--------------------|-----------------------------|
| N                 | 6               | 10                 | 5                           |
| Missing           | 7               | 12                 | 12                          |
| Mean (SD)         | 1.0 (10.58)     | 3.4 (16.56)        | -8.0 (5.10)                 |
| Median (Min, Max) | -1.0 (-11, 20)  | 2.5 (-27, 39)      | -7.0 (-15, -2)              |
| Week 26: PCHG     |                 |                    |                             |
| N                 | 6               | 10                 | 5                           |
| Missing           | 7               | 12                 | 12                          |
| Mean (SD)         | 0.9 (8.80)      | 2.7 (11.36)        | -6.6 (4.18)                 |
| Median (Min, Max) | -0.8 (-9, 17)   | 2.1 (-18, 25)      | -5.7 (-13, -2)              |
| Week 36: OBS      |                 |                    |                             |
| N                 | 7               | 9                  | 8                           |
| Missing           | 6               | 13                 | 9                           |
| Mean (SD)         | 116.3 (15.29)   | 127.8 (14.56)      | 122.1 (10.58)               |
| Median (Min, Max) | 120.0 (87, 135) | 129.0 (105, 159)   | 122.5 (105, 135)            |
| Week 36: CHG      |                 |                    |                             |
| N                 | 7               | 8                  | 6                           |
| Missing           | 6               | 14                 | 11                          |
| Mean (SD)         | 2.9 (7.45)      | 3.9 (13.02)        | 0.7 (14.77)                 |
| Median (Min, Max) | 0.0 (-6, 15)    | 7.0 (-19, 19)      | -2.5 (-16, 25)              |
| Week 36: PCHG     |                 |                    |                             |
| N                 | 7               | 8                  | 6                           |
| Missing           | 6               | 14                 | 11                          |
| Mean (SD)         | 3.1 (7.40)      | 3.6 (10.17)        | 0.9 (12.86)                 |
| Median (Min, Max) | 0.0 (-5, 14)    | 5.7 (-13, 14)      | -2.0 (-13, 23)              |
| Week 52: OBS      |                 |                    |                             |

Abbreviations: N, number of randomized subjects; n, number of subjects within each category; SD, Standard Deviation; Min, Minimum; Max, Maximum.

Program Name: MUCUS-Shell111-V01

Output Location: .\Output\Shared\MUCUS-TFLS-Final-27MAR24-V01.pdf

Table 14.3.5.1: Summary of Vital Signs

|                         | Naive<br>(N=13)  | Biologic<br>(N=22) | Multiple Biologic<br>(N=17) |
|-------------------------|------------------|--------------------|-----------------------------|
| N                       | 9                | 13                 | 10                          |
| Missing                 | 4                | 9                  | 7                           |
| Mean (SD)               | 124.4 (16.43)    | 130.3 (16.80)      | 127.5 (15.25)               |
| Median (Min, Max)       | 126.0 (105, 159) | 125.0 (112, 175)   | 127.0 (100, 148)            |
| Week 52: CHG            |                  |                    |                             |
| N                       | 7                | 11                 | 9                           |
| Missing                 | 6                | 11                 | 8                           |
| Mean (SD)               | 8.9 (18.59)      | 8.2 (14.26)        | 1.1 (19.80)                 |
| Median (Min, Max)       | 7.0 (-16, 34)    | 9.0 (-24, 31)      | 1.0 (-34, 28)               |
| Week 52: PCHG           |                  |                    |                             |
| N                       | 7                | 11                 | 9                           |
| Missing                 | 6                | 11                 | 8                           |
| Mean (SD)               | 10.8 (21.20)     | 7.1 (11.35)        | 2.2 (15.12)                 |
| Median (Min, Max)       | 5.6 (-13, 45)    | 7.0 (-16, 30)      | 0.8 (-19, 26)               |
| Early Termination: OBS  |                  |                    |                             |
| N                       | 0                | 2                  | 2                           |
| Missing                 | -                | -                  | -                           |
| Mean (SD)               | -                | 135.5 (12.02)      | 129.0 (4.24)                |
| Median (Min, Max)       | -                | 135.5 (127, 144)   | 129.0 (126, 132)            |
| Early Termination: CHG  |                  |                    |                             |
| N                       | 0                | 2                  | 0                           |
| Missing                 | -                | -                  | -                           |
| Mean (SD)               | -                | 5.5 (2.12)         | -                           |
| Median (Min, Max)       | -                | 5.5 (4, 7)         | -                           |
| Early Termination: PCHG |                  |                    |                             |

Abbreviations: N, number of randomized subjects; n, number of subjects within each category; SD, Standard Deviation; Min, Minimum; Max, Maximum.

Program Name: MUCUS-Shell111-V01

Output Location: .\Output\Shared\MUCUS-TFLS-Final-27MAR24-V01.pdf

Table 14.3.5.1: Summary of Vital Signs

|                       | Naive<br>(N=13)  | Biologic<br>(N=22) | Multiple Biologic<br>(N=17) |
|-----------------------|------------------|--------------------|-----------------------------|
| N                     | 0                | 2                  | 0                           |
| Missing               | -                | -                  | -                           |
| Mean (SD)             | -                | 4.3 (2.10)         | -                           |
| Median (Min, Max)     | -                | 4.3 (3, 6)         | -                           |
| Disease Flare: OBS    |                  |                    |                             |
| N                     | 0                | 0                  | 0                           |
| Missing               | -                | -                  | -                           |
| Mean (SD)             | -                | -                  | -                           |
| Median (Min, Max)     | -                | -                  | -                           |
| Disease Flare: CHG    |                  |                    |                             |
| N                     | 0                | 0                  | 0                           |
| Missing               | -                | -                  | -                           |
| Mean (SD)             | -                | -                  | -                           |
| Median (Min, Max)     | -                | -                  | -                           |
| Disease Flare: PCHG   |                  |                    |                             |
| N                     | 0                | 0                  | 0                           |
| Missing               | -                | -                  | -                           |
| Mean (SD)             | -                | -                  | -                           |
| Median (Min, Max)     | -                | -                  | -                           |
| Safety Follow-Up: OBS |                  |                    |                             |
| N                     | 7                | 8                  | 9                           |
| Missing               | 6                | 14                 | 8                           |
| Mean (SD)             | 120.0 (20.02)    | 130.0 (23.29)      | 129.4 (9.36)                |
| Median (Min, Max)     | 110.0 (103, 159) | 128.5 (93, 172)    | 128.0 (120, 149)            |

Safety Follow-Up: CHG

Abbreviations: N, number of randomized subjects; n, number of subjects within each category; SD, Standard Deviation; Min, Minimum; Max, Maximum.

Program Name: MUCUS-Shell111-V01

Output Location: .\Output\Shared\MUCUS-TFLS-Final-27MAR24-V01.pdf

Table 14.3.5.1: Summary of Vital Signs

|                        | Naive<br>(N=13) | Biologic<br>(N=22) | Multiple Biologic<br>(N=17) |
|------------------------|-----------------|--------------------|-----------------------------|
| N                      | 6               | 6                  | 6                           |
| Missing                | 7               | 16                 | 11                          |
| Mean (SD)              | 6.2 (17.47)     | 11.2 (15.79)       | 1.3 (28.30)                 |
| Median (Min, Max)      | 3.0 (-11, 27)   | 7.0 (-3, 42)       | 5.0 (-49, 30)               |
| Safety Follow-Up: PCHG |                 |                    |                             |
| N                      | 6               | 6                  | 6                           |
| Missing                | 7               | 16                 | 11                          |
| Mean (SD)              | 8.0 (19.24)     | 8.9 (12.09)        | 3.9 (19.47)                 |
| Median (Min, Max)      | 1.4 (-9, 36)    | 5.7 (-2, 32)       | 4.2 (-27, 28)               |
| Temperature (C)        |                 |                    |                             |
| Baseline: OBS          |                 |                    |                             |
| N                      | 9               | 17                 | 11                          |
| Missing                | 4               | 5                  | 6                           |
| Mean (SD)              | 36.4 (0.42)     | 36.4 (0.37)        | 36.3 (0.57)                 |
| Median (Min, Max)      | 36.3 (36, 37)   | 36.5 (36, 37)      | 36.4 (35, 37)               |
| Week 8: OBS            |                 |                    |                             |
| N                      | 12              | 20                 | 14                          |
| Missing                | 1               | 2                  | 3                           |
| Mean (SD)              | 36.3 (0.34)     | 36.5 (0.51)        | 36.3 (0.42)                 |
| Median (Min, Max)      | 36.3 (36, 37)   | 36.5 (36, 38)      | 36.3 (36, 37)               |
| Week 8: CHG            |                 |                    |                             |
| N                      | 9               | 15                 | 10                          |
| Missing                | 4               | 7                  | 7                           |
| Mean (SD)              | -0.0 (0.22)     | 0.0 (0.56)         | 0.1 (0.44)                  |
| Median (Min, Max)      | 0.0 (-0, 0)     | 0.1 (-1, 1)        | -0.0 (-0, 1)                |

Abbreviations: N, number of randomized subjects; n, number of subjects within each category; SD, Standard Deviation; Min, Minimum; Max, Maximum.

Program Name: MUCUS-Shell111-V01  
 Output Location: .\Output\Shared\MUCUS-TFLS-Final-27MAR24-V01.pdf

Table 14.3.5.1: Summary of Vital Signs

|                   | Naive<br>(N=13) | Biologic<br>(N=22) | Multiple Biologic<br>(N=17) |
|-------------------|-----------------|--------------------|-----------------------------|
| Week 8: PCHG      |                 |                    |                             |
| N                 | 9               | 15                 | 10                          |
| Missing           | 4               | 7                  | 7                           |
| Mean (SD)         | -0.1 (0.60)     | 0.1 (1.52)         | 0.2 (1.25)                  |
| Median (Min, Max) | 0.0 (-1, 1)     | 0.3 (-3, 3)        | -0.1 (-1, 3)                |
| Week 16: OBS      |                 |                    |                             |
| N                 | 9               | 18                 | 13                          |
| Missing           | 4               | 4                  | 4                           |
| Mean (SD)         | 36.3 (0.36)     | 36.5 (0.44)        | 36.3 (0.34)                 |
| Median (Min, Max) | 36.2 (36, 37)   | 36.6 (36, 38)      | 36.3 (36, 37)               |
| Week 16: CHG      |                 |                    |                             |
| N                 | 8               | 14                 | 9                           |
| Missing           | 5               | 8                  | 8                           |
| Mean (SD)         | -0.0 (0.27)     | 0.1 (0.57)         | 0.1 (0.68)                  |
| Median (Min, Max) | -0.0 (-1, 0)    | -0.1 (-1, 1)       | -0.1 (-0, 2)                |
| Week 16: PCHG     |                 |                    |                             |
| N                 | 8               | 14                 | 9                           |
| Missing           | 5               | 8                  | 8                           |
| Mean (SD)         | -0.1 (0.73)     | 0.2 (1.58)         | 0.2 (1.93)                  |
| Median (Min, Max) | -0.0 (-1, 1)    | -0.1 (-2, 4)       | -0.3 (-1, 5)                |
| Week 26: OBS      |                 |                    |                             |
| N                 | 7               | 12                 | 6                           |
| Missing           | 6               | 10                 | 11                          |
| Mean (SD)         | 36.3 (0.32)     | 40.3 (12.53)       | 36.4 (0.34)                 |
| Median (Min, Max) | 36.1 (36, 37)   | 36.8 (36, 80)      | 36.3 (36, 37)               |

Abbreviations: N, number of randomized subjects; n, number of subjects within each category; SD, Standard Deviation; Min, Minimum; Max, Maximum.

Program Name: MUCUS-Shell111-V01

Output Location: .\Output\Shared\MUCUS-TFLS-Final-27MAR24-V01.pdf

Table 14.3.5.1: Summary of Vital Signs

|                   | Naive<br>(N=13) | Biologic<br>(N=22) | Multiple Biologic<br>(N=17) |
|-------------------|-----------------|--------------------|-----------------------------|
| Week 26: CHG      |                 |                    |                             |
| N                 | 6               | 9                  | 5                           |
| Missing           | 7               | 13                 | 12                          |
| Mean (SD)         | -0.0 (0.26)     | 5.1 (14.33)        | 0.1 (0.35)                  |
| Median (Min, Max) | -0.1 (-0, 0)    | 0.3 (-0, 43)       | -0.1 (-0, 1)                |
| Week 26: PCHG     |                 |                    |                             |
| N                 | 6               | 9                  | 5                           |
| Missing           | 7               | 13                 | 12                          |
| Mean (SD)         | -0.0 (0.73)     | 13.9 (39.05)       | 0.2 (0.96)                  |
| Median (Min, Max) | -0.1 (-1, 1)    | 0.8 (-1, 118)      | -0.3 (-0, 2)                |
| Week 36: OBS      |                 |                    |                             |
| N                 | 7               | 10                 | 9                           |
| Missing           | 6               | 12                 | 8                           |
| Mean (SD)         | 36.2 (0.35)     | 36.3 (0.58)        | 36.3 (0.26)                 |
| Median (Min, Max) | 36.2 (36, 37)   | 36.3 (36, 38)      | 36.4 (36, 37)               |
| Week 36: CHG      |                 |                    |                             |
| N                 | 7               | 9                  | 7                           |
| Missing           | 6               | 13                 | 10                          |
| Mean (SD)         | -0.0 (0.39)     | -0.0 (0.54)        | 0.2 (0.48)                  |
| Median (Min, Max) | -0.1 (-1, 1)    | -0.1 (-1, 1)       | 0.2 (-0, 1)                 |
| Week 36: PCHG     |                 |                    |                             |
| N                 | 7               | 9                  | 7                           |
| Missing           | 6               | 13                 | 10                          |
| Mean (SD)         | -0.1 (1.08)     | -0.1 (1.47)        | 0.6 (1.35)                  |
| Median (Min, Max) | -0.3 (-2, 1)    | -0.3 (-2, 3)       | 0.6 (-1, 3)                 |

Abbreviations: N, number of randomized subjects; n, number of subjects within each category; SD, Standard Deviation; Min, Minimum; Max, Maximum.

Program Name: MUCUS-Shell111-V01

Output Location: .\Output\Shared\MUCUS-TFLS-Final-27MAR24-V01.pdf

Table 14.3.5.1: Summary of Vital Signs

|                        | Naive<br>(N=13) | Biologic<br>(N=22) | Multiple Biologic<br>(N=17) |
|------------------------|-----------------|--------------------|-----------------------------|
| Week 52: OBS           |                 |                    |                             |
| N                      | 9               | 12                 | 10                          |
| Missing                | 4               | 10                 | 7                           |
| Mean (SD)              | 36.4 (0.37)     | 36.4 (0.28)        | 36.3 (0.34)                 |
| Median (Min, Max)      | 36.4 (36, 37)   | 36.5 (36, 37)      | 36.3 (36, 37)               |
| Week 52: CHG           |                 |                    |                             |
| N                      | 7               | 10                 | 9                           |
| Missing                | 6               | 12                 | 8                           |
| Mean (SD)              | -0.1 (0.42)     | -0.1 (0.25)        | -0.1 (0.78)                 |
| Median (Min, Max)      | 0.1 (-1, 0)     | -0.2 (-0, 0)       | -0.2 (-1, 1)                |
| Week 52: PCHG          |                 |                    |                             |
| N                      | 7               | 10                 | 9                           |
| Missing                | 6               | 12                 | 8                           |
| Mean (SD)              | -0.2 (1.12)     | -0.2 (0.69)        | -0.2 (2.16)                 |
| Median (Min, Max)      | 0.3 (-2, 1)     | -0.4 (-1, 1)       | -0.6 (-3, 4)                |
| Early Termination: OBS |                 |                    |                             |
| N                      | 0               | 2                  | 2                           |
| Missing                | -               | -                  | -                           |
| Mean (SD)              | -               | 36.4 (0.49)        | 36.5 (0.07)                 |
| Median (Min, Max)      | -               | 36.4 (36, 37)      | 36.5 (36, 37)               |
| Early Termination: CHG |                 |                    |                             |
| N                      | 0               | 2                  | 0                           |
| Missing                | -               | -                  | -                           |
| Mean (SD)              | -               | 0.1 (0.42)         | -                           |
| Median (Min, Max)      | -               | 0.1 (-0, 0)        | -                           |

Abbreviations: N, number of randomized subjects; n, number of subjects within each category; SD, Standard Deviation; Min, Minimum; Max, Maximum.

Table 14.3.5.1: Summary of Vital Signs

|                         | Naive<br>(N=13) | Biologic<br>(N=22) | Multiple Biologic<br>(N=17) |
|-------------------------|-----------------|--------------------|-----------------------------|
| Early Termination: PCHG |                 |                    |                             |
| N                       | 0               | 2                  | 0                           |
| Missing                 | -               | -                  | -                           |
| Mean (SD)               | -               | 0.3 (1.17)         | -                           |
| Median (Min, Max)       | -               | 0.3 (-1, 1)        | -                           |
| Disease Flare: OBS      |                 |                    |                             |
| N                       | 0               | 0                  | 0                           |
| Missing                 | -               | -                  | -                           |
| Mean (SD)               | -               | -                  | -                           |
| Median (Min, Max)       | -               | -                  | -                           |
| Disease Flare: CHG      |                 |                    |                             |
| N                       | 0               | 0                  | 0                           |
| Missing                 | -               | -                  | -                           |
| Mean (SD)               | -               | -                  | -                           |
| Median (Min, Max)       | -               | -                  | -                           |
| Disease Flare: PCHG     |                 |                    |                             |
| N                       | 0               | 0                  | 0                           |
| Missing                 | -               | -                  | -                           |
| Mean (SD)               | -               | -                  | -                           |
| Median (Min, Max)       | -               | -                  | -                           |
| Safety Follow-Up: OBS   |                 |                    |                             |
| N                       | 7               | 8                  | 9                           |
| Missing                 | 6               | 14                 | 8                           |
| Mean (SD)               | 36.3 (0.79)     | 36.4 (0.23)        | 36.5 (0.47)                 |
| Median (Min, Max)       | 36.2 (35, 38)   | 36.4 (36, 37)      | 36.5 (36, 37)               |

Abbreviations: N, number of randomized subjects; n, number of subjects within each category; SD, Standard Deviation; Min, Minimum; Max, Maximum.

Program Name: MUCUS-Shell111-V01

Output Location: .\Output\Shared\MUCUS-TFLS-Final-27MAR24-V01.pdf



Table 14.3.5.1: Summary of Vital Signs

|                        | Naive<br>(N=13) | Biologic<br>(N=22) | Multiple Biologic<br>(N=17) |
|------------------------|-----------------|--------------------|-----------------------------|
| Safety Follow-Up: CHG  |                 |                    |                             |
| N                      | 6               | 6                  | 6                           |
| Missing                | 7               | 16                 | 11                          |
| Mean (SD)              | -0.2 (1.06)     | -0.2 (0.22)        | 0.1 (0.85)                  |
| Median (Min, Max)      | -0.3 (-2, 2)    | -0.2 (-0, 0)       | -0.0 (-1, 2)                |
| Safety Follow-Up: PCHG |                 |                    |                             |
| N                      | 6               | 6                  | 6                           |
| Missing                | 7               | 16                 | 11                          |
| Mean (SD)              | -0.6 (2.90)     | -0.4 (0.59)        | 0.2 (2.39)                  |
| Median (Min, Max)      | -1.0 (-4, 4)    | -0.5 (-1, 1)       | -0.1 (-2, 5)                |
| Weight (kg)            |                 |                    |                             |
| Baseline: OBS          |                 |                    |                             |
| N                      | 9               | 17                 | 11                          |
| Missing                | 4               | 5                  | 6                           |
| Mean (SD)              | 69.8 (15.97)    | 72.8 (15.00)       | 73.1 (15.51)                |
| Median (Min, Max)      | 78.0 (39, 84)   | 67.0 (49, 102)     | 72.0 (47, 105)              |
| Week 8: OBS            |                 |                    |                             |
| N                      | 12              | 20                 | 14                          |
| Missing                | 1               | 2                  | 3                           |
| Mean (SD)              | 71.5 (16.22)    | 71.7 (14.25)       | 75.6 (15.85)                |
| Median (Min, Max)      | 78.0 (41, 100)  | 68.0 (54, 102)     | 74.5 (49, 108)              |
| Week 8: CHG            |                 |                    |                             |
| N                      | 9               | 15                 | 10                          |
| Missing                | 4               | 7                  | 7                           |
| Mean (SD)              | 1.0 (1.66)      | 0.6 (1.92)         | 1.3 (3.77)                  |
| Median (Min, Max)      | 1.0 (-1, 4)     | 0.0 (-2, 5)        | 2.5 (-8, 5)                 |

Abbreviations: N, number of randomized subjects; n, number of subjects within each category; SD, Standard Deviation; Min, Minimum; Max, Maximum.

Program Name: MUCUS-Shell111-V01

Output Location: .\Output\Shared\MUCUS-TFLS-Final-27MAR24-V01.pdf

Table 14.3.5.1: Summary of Vital Signs

|                   | Naive<br>(N=13) | Biologic<br>(N=22) | Multiple Biologic<br>(N=17) |
|-------------------|-----------------|--------------------|-----------------------------|
| Week 8: PCHG      |                 |                    |                             |
| N                 | 9               | 15                 | 10                          |
| Missing           | 4               | 7                  | 7                           |
| Mean (SD)         | 1.8 (2.65)      | 1.0 (3.34)         | 2.1 (5.15)                  |
| Median (Min, Max) | 1.2 (-1, 5)     | 0.0 (-4, 10)       | 3.6 (-10, 8)                |
| Week 16: OBS      |                 |                    |                             |
| N                 | 9               | 18                 | 13                          |
| Missing           | 4               | 4                  | 4                           |
| Mean (SD)         | 72.6 (11.57)    | 71.8 (13.38)       | 73.6 (14.27)                |
| Median (Min, Max) | 79.0 (53, 83)   | 69.5 (54, 102)     | 72.0 (51, 94)               |
| Week 16: CHG      |                 |                    |                             |
| N                 | 8               | 14                 | 9                           |
| Missing           | 5               | 8                  | 8                           |
| Mean (SD)         | 0.8 (1.83)      | 1.6 (3.59)         | 0.9 (5.46)                  |
| Median (Min, Max) | 1.5 (-2, 3)     | 0.5 (-4, 10)       | 3.0 (-10, 6)                |
| Week 16: PCHG     |                 |                    |                             |
| N                 | 8               | 14                 | 9                           |
| Missing           | 5               | 8                  | 8                           |
| Mean (SD)         | 1.3 (2.69)      | 2.7 (5.59)         | 2.0 (7.78)                  |
| Median (Min, Max) | 1.9 (-2, 5)     | 0.5 (-5, 15)       | 4.7 (-13, 11)               |
| Week 26: OBS      |                 |                    |                             |
| N                 | 7               | 13                 | 6                           |
| Missing           | 6               | 9                  | 11                          |
| Mean (SD)         | 74.6 (12.19)    | 75.4 (14.56)       | 75.0 (10.49)                |
| Median (Min, Max) | 82.0 (54, 83)   | 73.0 (56, 102)     | 71.0 (66, 94)               |

Abbreviations: N, number of randomized subjects; n, number of subjects within each category; SD, Standard Deviation; Min, Minimum; Max, Maximum.

Program Name: MUCUS-Shell111-V01

Output Location: .\Output\Shared\MUCUS-TFLS-Final-27MAR24-V01.pdf

Table 14.3.5.1: Summary of Vital Signs

|                   | Naive<br>(N=13) | Biologic<br>(N=22) | Multiple Biologic<br>(N=17) |
|-------------------|-----------------|--------------------|-----------------------------|
| Week 26: CHG      |                 |                    |                             |
| N                 | 6               | 10                 | 5                           |
| Missing           | 7               | 12                 | 12                          |
| Mean (SD)         | 1.2 (2.64)      | 1.9 (2.77)         | 4.0 (3.74)                  |
| Median (Min, Max) | 2.0 (-3, 4)     | 1.0 (-1, 8)        | 2.0 (0, 8)                  |
| Week 26: PCHG     |                 |                    |                             |
| N                 | 6               | 10                 | 5                           |
| Missing           | 7               | 12                 | 12                          |
| Mean (SD)         | 1.9 (3.67)      | 2.8 (4.11)         | 6.4 (6.26)                  |
| Median (Min, Max) | 2.5 (-4, 6)     | 1.2 (-1, 12)       | 3.1 (0, 13)                 |
| Week 36: OBS      |                 |                    |                             |
| N                 | 7               | 10                 | 9                           |
| Missing           | 6               | 12                 | 8                           |
| Mean (SD)         | 73.4 (16.60)    | 78.2 (14.58)       | 75.2 (13.61)                |
| Median (Min, Max) | 82.0 (45, 85)   | 77.5 (60, 102)     | 74.0 (52, 95)               |
| Week 36: CHG      |                 |                    |                             |
| N                 | 7               | 9                  | 7                           |
| Missing           | 6               | 13                 | 10                          |
| Mean (SD)         | 2.9 (3.24)      | 2.2 (3.73)         | 3.7 (4.92)                  |
| Median (Min, Max) | 4.0 (-3, 6)     | 1.0 (-1, 11)       | 4.0 (-6, 10)                |
| Week 36: PCHG     |                 |                    |                             |
| N                 | 7               | 9                  | 7                           |
| Missing           | 6               | 13                 | 10                          |
| Mean (SD)         | 5.1 (5.92)      | 3.4 (5.71)         | 5.6 (7.16)                  |
| Median (Min, Max) | 5.9 (-4, 15)    | 1.0 (-1, 17)       | 5.6 (-8, 16)                |

Abbreviations: N, number of randomized subjects; n, number of subjects within each category; SD, Standard Deviation; Min, Minimum; Max, Maximum.

Table 14.3.5.1: Summary of Vital Signs

|                        | Naive<br>(N=13) | Biologic<br>(N=22) | Multiple Biologic<br>(N=17) |
|------------------------|-----------------|--------------------|-----------------------------|
| Week 52: OBS           |                 |                    |                             |
| N                      | 9               | 13                 | 10                          |
| Missing                | 4               | 9                  | 7                           |
| Mean (SD)              | 72.2 (19.16)    | 72.5 (12.95)       | 78.2 (15.63)                |
| Median (Min, Max)      | 78.0 (44, 107)  | 70.0 (56, 102)     | 77.5 (61, 115)              |
| Week 52: CHG           |                 |                    |                             |
| N                      | 7               | 11                 | 9                           |
| Missing                | 6               | 11                 | 8                           |
| Mean (SD)              | 1.1 (3.34)      | 1.5 (5.03)         | 4.8 (6.00)                  |
| Median (Min, Max)      | 1.0 (-4, 5)     | 1.0 (-10, 11)      | 2.0 (-2, 15)                |
| Week 52: PCHG          |                 |                    |                             |
| N                      | 7               | 11                 | 9                           |
| Missing                | 6               | 11                 | 8                           |
| Mean (SD)              | 2.9 (6.10)      | 2.7 (7.19)         | 7.8 (11.01)                 |
| Median (Min, Max)      | 1.7 (-5, 13)    | 1.8 (-13, 17)      | 3.1 (-2, 32)                |
| Early Termination: OBS |                 |                    |                             |
| N                      | 0               | 2                  | 2                           |
| Missing                | -               | -                  | -                           |
| Mean (SD)              | -               | 74.0 (8.49)        | 67.5 (21.92)                |
| Median (Min, Max)      | -               | 74.0 (68, 80)      | 67.5 (52, 83)               |
| Early Termination: CHG |                 |                    |                             |
| N                      | 0               | 2                  | 0                           |
| Missing                | -               | -                  | -                           |
| Mean (SD)              | -               | 0.0 (0.00)         | -                           |
| Median (Min, Max)      | -               | 0.0 (0, 0)         | -                           |

Abbreviations: N, number of randomized subjects; n, number of subjects within each category; SD, Standard Deviation; Min, Minimum; Max, Maximum.

Program Name: MUCUS-Shell111-V01

Output Location: .\Output\Shared\MUCUS-TFLS-Final-27MAR24-V01.pdf

Table 14.3.5.1: Summary of Vital Signs

|                         | Naive<br>(N=13) | Biologic<br>(N=22) | Multiple Biologic<br>(N=17) |
|-------------------------|-----------------|--------------------|-----------------------------|
| Early Termination: PCHG |                 |                    |                             |
| N                       | 0               | 2                  | 0                           |
| Missing                 | -               | -                  | -                           |
| Mean (SD)               | -               | 0.0 (0.00)         | -                           |
| Median (Min, Max)       | -               | 0.0 (0, 0)         | -                           |
| Disease Flare: OBS      |                 |                    |                             |
| N                       | 0               | 0                  | 0                           |
| Missing                 | -               | -                  | -                           |
| Mean (SD)               | -               | -                  | -                           |
| Median (Min, Max)       | -               | -                  | -                           |
| Disease Flare: CHG      |                 |                    |                             |
| N                       | 0               | 0                  | 0                           |
| Missing                 | -               | -                  | -                           |
| Mean (SD)               | -               | -                  | -                           |
| Median (Min, Max)       | -               | -                  | -                           |
| Disease Flare: PCHG     |                 |                    |                             |
| N                       | 0               | 0                  | 0                           |
| Missing                 | -               | -                  | -                           |
| Mean (SD)               | -               | -                  | -                           |
| Median (Min, Max)       | -               | -                  | -                           |
| Safety Follow-Up: OBS   |                 |                    |                             |
| N                       | 7               | 8                  | 9                           |
| Missing                 | 6               | 14                 | 8                           |
| Mean (SD)               | 65.1 (14.19)    | 70.8 (7.87)        | 85.0 (14.05)                |
| Median (Min, Max)       | 62.0 (44, 83)   | 69.5 (59, 84)      | 81.0 (68, 116)              |

Abbreviations: N, number of randomized subjects; n, number of subjects within each category; SD, Standard Deviation; Min, Minimum; Max, Maximum.

Table 14.3.5.1: Summary of Vital Signs

|                        | Naive<br>(N=13) | Biologic<br>(N=22) | Multiple Biologic<br>(N=17) |
|------------------------|-----------------|--------------------|-----------------------------|
| Safety Follow-Up: CHG  |                 |                    |                             |
| N                      | 6               | 6                  | 6                           |
| Missing                | 7               | 16                 | 11                          |
| Mean (SD)              | 1.3 (3.27)      | -0.7 (4.89)        | 7.3 (7.66)                  |
| Median (Min, Max)      | 2.5 (-4, 5)     | 0.5 (-10, 4)       | 4.5 (0, 21)                 |
| Safety Follow-Up: PCHG |                 |                    |                             |
| N                      | 6               | 6                  | 6                           |
| Missing                | 7               | 16                 | 11                          |
| Mean (SD)              | 3.3 (6.07)      | -0.8 (6.18)        | 11.8 (16.54)                |
| Median (Min, Max)      | 3.5 (-5, 13)    | 0.7 (-13, 5)       | 6.1 (0, 45)                 |

Abbreviations: N, number of randomized subjects; n, number of subjects within each category; SD, Standard Deviation; Min, Minimum; Max, Maximum.

Program Name: MUCUS-Shell111-V01

Output Location: .\Output\Shared\MUCUS-TFLS-Final-27MAR24-V01.pdf

Table 14.3.5.2: Summary of Clinical Laboratory Test Results

|                   | Naive<br>(N=13) | Biologic<br>(N=22) | Multiple Biologic<br>(N=17) |
|-------------------|-----------------|--------------------|-----------------------------|
| <b>Albumin</b>    |                 |                    |                             |
| Baseline: OBS     |                 |                    |                             |
| N                 | 11              | 22                 | 15                          |
| Missing           | 2               | 0                  | 2                           |
| Mean (SD)         | 39.0 (7.01)     | 34.9 (10.12)       | 35.1 (5.60)                 |
| Median (Min, Max) | 39.4 (23, 47)   | 37.9 (4, 49)       | 36.6 (21, 43)               |
| Week 8: OBS       |                 |                    |                             |
| N                 | 12              | 17                 | 13                          |
| Missing           | 1               | 5                  | 4                           |
| Mean (SD)         | 40.1 (7.07)     | 39.4 (5.85)        | 39.2 (3.57)                 |
| Median (Min, Max) | 43.4 (24, 47)   | 39.6 (29, 51)      | 39.5 (31, 44)               |
| Week 8: CHG       |                 |                    |                             |
| N                 | 10              | 17                 | 12                          |
| Missing           | 3               | 5                  | 5                           |
| Mean (SD)         | 1.7 (3.52)      | 5.9 (9.73)         | 4.4 (5.29)                  |
| Median (Min, Max) | 1.3 (-2, 9)     | 2.6 (-3, 39)       | 5.0 (-4, 17)                |
| Week 8: PCHG      |                 |                    |                             |
| N                 | 10              | 17                 | 12                          |
| Missing           | 3               | 5                  | 5                           |
| Mean (SD)         | 5.1 (9.90)      | 68.0 (221.82)      | 15.8 (23.02)                |
| Median (Min, Max) | 3.7 (-4, 27)    | 8.2 (-8, 924)      | 14.0 (-10, 81)              |
| Week 16: OBS      |                 |                    |                             |
| N                 | 8               | 16                 | 11                          |
| Missing           | 5               | 6                  | 6                           |
| Mean (SD)         | 39.3 (9.85)     | 40.2 (4.64)        | 37.8 (3.66)                 |
| Median (Min, Max) | 44.0 (21, 46)   | 41.2 (28, 45)      | 38.1 (31, 43)               |

Abbreviations: N, number of randomized subjects; n, number of subjects within each category; SD, Standard Deviation; Min, Minimum; Max, Maximum.

Table 14.3.5.2: Summary of Clinical Laboratory Test Results

|                   | Naive<br>(N=13) | Biologic<br>(N=22) | Multiple Biologic<br>(N=17) |
|-------------------|-----------------|--------------------|-----------------------------|
| Week 16: CHG      |                 |                    |                             |
| N                 | 7               | 16                 | 10                          |
| Missing           | 6               | 6                  | 7                           |
| Mean (SD)         | 0.3 (2.21)      | 4.6 (6.37)         | 3.7 (5.23)                  |
| Median (Min, Max) | -0.5 (-2, 3)    | 3.6 (-5, 20)       | 1.5 (-2, 14)                |
| Week 16: PCHG     |                 |                    |                             |
| N                 | 7               | 16                 | 10                          |
| Missing           | 6               | 6                  | 7                           |
| Mean (SD)         | 0.1 (6.18)      | 17.9 (27.85)       | 13.8 (22.04)                |
| Median (Min, Max) | -1.1 (-10, 7)   | 9.0 (-10, 105)     | 4.1 (-5, 67)                |
| Week 26: OBS      |                 |                    |                             |
| N                 | 6               | 9                  | 6                           |
| Missing           | 7               | 13                 | 11                          |
| Mean (SD)         | 44.4 (3.22)     | 39.2 (7.33)        | 39.8 (6.08)                 |
| Median (Min, Max) | 44.7 (40, 49)   | 41.3 (23, 48)      | 39.5 (32, 49)               |
| Week 26: CHG      |                 |                    |                             |
| N                 | 5               | 9                  | 5                           |
| Missing           | 8               | 13                 | 12                          |
| Mean (SD)         | 2.1 (3.23)      | 1.9 (3.69)         | 7.1 (5.26)                  |
| Median (Min, Max) | 1.0 (-1, 8)     | 1.1 (-4, 9)        | 5.4 (2, 16)                 |
| Week 26: PCHG     |                 |                    |                             |
| N                 | 5               | 9                  | 5                           |
| Missing           | 8               | 13                 | 12                          |
| Mean (SD)         | 5.4 (8.52)      | 5.9 (10.35)        | 21.3 (16.08)                |
| Median (Min, Max) | 2.2 (-2, 20)    | 4.1 (-9, 27)       | 14.8 (7, 46)                |

Abbreviations: N, number of randomized subjects; n, number of subjects within each category; SD, Standard Deviation; Min, Minimum; Max, Maximum.

Program Name: MUCUS-Shell111-V01

Output Location: .\Output\Shared\MUCUS-TFLS-Final-27MAR24-V01.pdf



Table 14.3.5.2: Summary of Clinical Laboratory Test Results

|                   | Naive<br>(N=13) | Biologic<br>(N=22) | Multiple Biologic<br>(N=17) |
|-------------------|-----------------|--------------------|-----------------------------|
| Week 36: OBS      |                 |                    |                             |
| N                 | 6               | 9                  | 7                           |
| Missing           | 7               | 13                 | 10                          |
| Mean (SD)         | 42.9 (4.38)     | 41.2 (6.74)        | 40.5 (3.80)                 |
| Median (Min, Max) | 43.8 (37, 47)   | 43.5 (27, 48)      | 39.3 (36, 46)               |
| Week 36: CHG      |                 |                    |                             |
| N                 | 6               | 9                  | 6                           |
| Missing           | 7               | 13                 | 11                          |
| Mean (SD)         | 1.2 (1.73)      | 3.8 (4.20)         | 6.9 (3.59)                  |
| Median (Min, Max) | 1.0 (-1, 4)     | 3.4 (-1, 12)       | 6.0 (3, 13)                 |
| Week 36: PCHG     |                 |                    |                             |
| N                 | 6               | 9                  | 6                           |
| Missing           | 7               | 13                 | 11                          |
| Mean (SD)         | 2.9 (4.14)      | 11.6 (13.06)       | 20.8 (11.84)                |
| Median (Min, Max) | 2.3 (-3, 9)     | 8.1 (-2, 37)       | 17.8 (7, 37)                |
| Week 52: OBS      |                 |                    |                             |
| N                 | 9               | 12                 | 7                           |
| Missing           | 4               | 10                 | 10                          |
| Mean (SD)         | 45.1 (2.97)     | 42.6 (4.68)        | 41.8 (5.83)                 |
| Median (Min, Max) | 45.0 (39, 50)   | 43.4 (33, 49)      | 40.7 (33, 51)               |
| Week 52: CHG      |                 |                    |                             |
| N                 | 7               | 12                 | 6                           |
| Missing           | 6               | 10                 | 11                          |
| Mean (SD)         | 4.9 (4.42)      | 9.7 (11.10)        | 7.1 (5.85)                  |
| Median (Min, Max) | 3.0 (0, 12)     | 5.5 (-0, 39)       | 6.0 (2, 17)                 |

Abbreviations: N, number of randomized subjects; n, number of subjects within each category; SD, Standard Deviation; Min, Minimum; Max, Maximum.

Program Name: MUCUS-Shell111-V01

Output Location: .\Output\Shared\MUCUS-TFLS-Final-27MAR24-V01.pdf

Table 14.3.5.2: Summary of Clinical Laboratory Test Results

|                         | Naive<br>(N=13) | Biologic<br>(N=22) | Multiple Biologic<br>(N=17) |
|-------------------------|-----------------|--------------------|-----------------------------|
| Week 52: PCHG           |                 |                    |                             |
| N                       | 7               | 12                 | 6                           |
| Missing                 | 6               | 10                 | 11                          |
| Mean (SD)               | 13.5 (13.47)    | 101.3 (260.83)     | 21.4 (17.88)                |
| Median (Min, Max)       | 7.0 (0, 36)     | 14.9 (-0, 924)     | 18.8 (4, 49)                |
| Early Termination: OBS  |                 |                    |                             |
| N                       | 0               | 2                  | 2                           |
| Missing                 | -               | -                  | -                           |
| Mean (SD)               | -               | 40.7 (0.21)        | 38.2 (1.63)                 |
| Median (Min, Max)       | -               | 40.7 (41, 41)      | 38.2 (37, 39)               |
| Early Termination: CHG  |                 |                    |                             |
| N                       | 0               | 2                  | 2                           |
| Missing                 | -               | -                  | -                           |
| Mean (SD)               | -               | 2.0 (4.03)         | 9.4 (9.40)                  |
| Median (Min, Max)       | -               | 2.0 (-1, 5)        | 9.4 (3, 16)                 |
| Early Termination: PCHG |                 |                    |                             |
| N                       | 0               | 2                  | 2                           |
| Missing                 | -               | -                  | -                           |
| Mean (SD)               | -               | 5.9 (11.09)        | 41.8 (48.66)                |
| Median (Min, Max)       | -               | 5.9 (-2, 14)       | 41.8 (7, 76)                |
| Disease Flare: OBS      |                 |                    |                             |
| N                       | 0               | 0                  | 1                           |
| Missing                 | -               | -                  | -                           |
| Mean (SD)               | -               | -                  | 38.9 (-)                    |
| Median (Min, Max)       | -               | -                  | 38.9 (39, 39)               |

Abbreviations: N, number of randomized subjects; n, number of subjects within each category; SD, Standard Deviation; Min, Minimum; Max, Maximum.

Program Name: MUCUS-Shell111-V01

Output Location: .\Output\Shared\MUCUS-TFLS-Final-27MAR24-V01.pdf

Table 14.3.5.2: Summary of Clinical Laboratory Test Results

|                        | Naive<br>(N=13) | Biologic<br>(N=22) | Multiple Biologic<br>(N=17) |
|------------------------|-----------------|--------------------|-----------------------------|
| Disease Flare: CHG     |                 |                    |                             |
| N                      | 0               | 0                  | 1                           |
| Missing                | -               | -                  | -                           |
| Mean (SD)              | -               | -                  | 0.2 (-)                     |
| Median (Min, Max)      | -               | -                  | 0.2 (0, 0)                  |
| Disease Flare: PCHG    |                 |                    |                             |
| N                      | 0               | 0                  | 1                           |
| Missing                | -               | -                  | -                           |
| Mean (SD)              | -               | -                  | 0.5 (-)                     |
| Median (Min, Max)      | -               | -                  | 0.5 (1, 1)                  |
| Safety Follow-Up: OBS  |                 |                    |                             |
| N                      | 6               | 5                  | 9                           |
| Missing                | 7               | 17                 | 8                           |
| Mean (SD)              | 42.0 (3.16)     | 36.9 (4.97)        | 40.1 (4.48)                 |
| Median (Min, Max)      | 43.5 (38, 45)   | 38.0 (29, 42)      | 40.6 (33, 46)               |
| Safety Follow-Up: CHG  |                 |                    |                             |
| N                      | 4               | 5                  | 9                           |
| Missing                | 9               | 17                 | 8                           |
| Mean (SD)              | 0.3 (5.56)      | 5.4 (7.50)         | 5.7 (6.20)                  |
| Median (Min, Max)      | -1.0 (-5, 8)    | 1.3 (0, 18)        | 7.0 (-4, 15)                |
| Safety Follow-Up: PCHG |                 |                    |                             |
| N                      | 4               | 5                  | 9                           |
| Missing                | 9               | 17                 | 8                           |
| Mean (SD)              | 1.7 (14.89)     | 26.0 (40.23)       | 20.4 (24.85)                |
| Median (Min, Max)      | -2.2 (-12, 23)  | 3.4 (0, 95)        | 17.9 (-10, 71)              |

Abbreviations: N, number of randomized subjects; n, number of subjects within each category; SD, Standard Deviation; Min, Minimum; Max, Maximum.

Table 14.3.5.2: Summary of Clinical Laboratory Test Results

|                    | Naive<br>(N=13)  | Biologic<br>(N=22) | Multiple Biologic<br>(N=17) |
|--------------------|------------------|--------------------|-----------------------------|
| C-Reactive Protein |                  |                    |                             |
| Baseline: OBS      |                  |                    |                             |
| N                  | 13               | 22                 | 17                          |
| Missing            | 0                | 0                  | 0                           |
| Mean (SD)          | 18.1 (16.75)     | 19.8 (29.56)       | 35.3 (49.40)                |
| Median (Min, Max)  | 12.6 (1, 52)     | 7.4 (1, 113)       | 25.9 (0, 210)               |
| Week 8: OBS        |                  |                    |                             |
| N                  | 12               | 20                 | 14                          |
| Missing            | 1                | 2                  | 3                           |
| Mean (SD)          | 12.9 (18.55)     | 10.1 (12.24)       | 9.8 (9.56)                  |
| Median (Min, Max)  | 6.6 (1, 67)      | 5.8 (1, 48)        | 4.6 (1, 31)                 |
| Week 8: CHG        |                  |                    |                             |
| N                  | 12               | 20                 | 14                          |
| Missing            | 1                | 2                  | 3                           |
| Mean (SD)          | -5.6 (19.74)     | -11.2 (24.47)      | -28.9 (46.50)               |
| Median (Min, Max)  | -1.5 (-47, 33)   | -1.4 (-76, 17)     | -15.7 (-180, 1)             |
| Week 8: PCHG       |                  |                    |                             |
| N                  | 12               | 20                 | 14                          |
| Missing            | 1                | 2                  | 3                           |
| Mean (SD)          | -7.0 (75.77)     | 6.0 (102.16)       | -27.2 (126.52)              |
| Median (Min, Max)  | -43.8 (-91, 110) | -21.7 (-91, 253)   | -65.4 (-93, 400)            |
| Week 16: OBS       |                  |                    |                             |
| N                  | 8                | 18                 | 12                          |
| Missing            | 5                | 4                  | 5                           |
| Mean (SD)          | 7.2 (7.74)       | 8.5 (10.81)        | 16.6 (18.87)                |

Abbreviations: N, number of randomized subjects; n, number of subjects within each category; SD, Standard Deviation; Min, Minimum; Max, Maximum.

Program Name: MUCUS-Shell111-V01

Output Location: .\Output\Shared\MUCUS-TFLS-Final-27MAR24-V01.pdf

Table 14.3.5.2: Summary of Clinical Laboratory Test Results

|                   | Naive<br>(N=13) | Biologic<br>(N=22) | Multiple Biologic<br>(N=17) |
|-------------------|-----------------|--------------------|-----------------------------|
| Median (Min, Max) | 5.0 (1, 21)     | 4.0 (1, 39)        | 6.6 (1, 58)                 |
| Week 16: CHG      |                 |                    |                             |
| N                 | 8               | 18                 | 12                          |
| Missing           | 5               | 4                  | 5                           |
| Mean (SD)         | -4.7 (11.18)    | -14.6 (26.86)      | -25.6 (48.60)               |
| Median (Min, Max) | -1.0 (-26, 8)   | -2.6 (-81, 12)     | -7.2 (-165, 15)             |
| Week 16: PCHG     |                 |                    |                             |
| N                 | 8               | 18                 | 12                          |
| Missing           | 5               | 4                  | 5                           |
| Mean (SD)         | -20.3 (57.43)   | -16.9 (91.63)      | 55.3 (256.93)               |
| Median (Min, Max) | -40.3 (-85, 66) | -36.8 (-93, 294)   | -58.8 (-93, 667)            |
| Week 26: OBS      |                 |                    |                             |
| N                 | 6               | 10                 | 6                           |
| Missing           | 7               | 12                 | 11                          |
| Mean (SD)         | 1.8 (0.92)      | 24.0 (48.08)       | 8.6 (11.84)                 |
| Median (Min, Max) | 1.9 (1, 3)      | 4.4 (1, 156)       | 4.5 (1, 33)                 |
| Week 26: CHG      |                 |                    |                             |
| N                 | 6               | 10                 | 6                           |
| Missing           | 7               | 12                 | 11                          |
| Mean (SD)         | -10.4 (19.22)   | 1.6 (18.13)        | -16.6 (23.54)               |
| Median (Min, Max) | -1.7 (-49, 1)   | -0.9 (-31, 43)     | -5.4 (-50, 7)               |
| Week 26: PCHG     |                 |                    |                             |
| N                 | 6               | 10                 | 6                           |
| Missing           | 7               | 12                 | 11                          |
| Mean (SD)         | -38.5 (65.06)   | -8.4 (70.47)       | -55.7 (45.07)               |

Abbreviations: N, number of randomized subjects; n, number of subjects within each category; SD, Standard Deviation; Min, Minimum; Max, Maximum.

Program Name: MUCUS-Shell111-V01

Output Location: .\Output\Shared\MUCUS-TFLS-Final-27MAR24-V01.pdf

Table 14.3.5.2: Summary of Clinical Laboratory Test Results

|                   | Naive<br>(N=13) | Biologic<br>(N=22) | Multiple Biologic<br>(N=17) |
|-------------------|-----------------|--------------------|-----------------------------|
| Median (Min, Max) | -53.3 (-94, 80) | -15.7 (-84, 141)   | -68.5 (-93, 26)             |
| Week 36: OBS      |                 |                    |                             |
| N                 | 8               | 9                  | 9                           |
| Missing           | 5               | 13                 | 8                           |
| Mean (SD)         | 8.5 (11.28)     | 7.5 (13.66)        | 9.3 (11.09)                 |
| Median (Min, Max) | 3.1 (1, 31)     | 4.0 (1, 44)        | 4.0 (1, 34)                 |
| Week 36: CHG      |                 |                    |                             |
| N                 | 8               | 9                  | 9                           |
| Missing           | 5               | 13                 | 8                           |
| Mean (SD)         | -5.2 (6.45)     | -12.7 (23.94)      | -12.4 (19.92)               |
| Median (Min, Max) | -3.3 (-19, 1)   | -3.0 (-69, 3)      | -5.6 (-50, 8)               |
| Week 36: PCHG     |                 |                    |                             |
| N                 | 8               | 9                  | 9                           |
| Missing           | 5               | 13                 | 8                           |
| Mean (SD)         | -29.0 (55.68)   | -28.4 (80.91)      | 61.8 (246.87)               |
| Median (Min, Max) | -41.5 (-79, 90) | -50.0 (-93, 176)   | -48.7 (-93, 633)            |
| Week 52: OBS      |                 |                    |                             |
| N                 | 9               | 13                 | 10                          |
| Missing           | 4               | 9                  | 7                           |
| Mean (SD)         | 7.6 (7.98)      | 4.6 (5.04)         | 9.9 (9.96)                  |
| Median (Min, Max) | 5.4 (1, 21)     | 3.3 (1, 19)        | 4.1 (1, 28)                 |
| Week 52: CHG      |                 |                    |                             |
| N                 | 9               | 13                 | 10                          |
| Missing           | 4               | 9                  | 7                           |
| Mean (SD)         | -14.9 (15.91)   | -21.5 (33.52)      | -21.5 (18.97)               |

Abbreviations: N, number of randomized subjects; n, number of subjects within each category; SD, Standard Deviation; Min, Minimum; Max, Maximum.

Program Name: MUCUS-Shell111-V01

Output Location: .\Output\Shared\MUCUS-TFLS-Final-27MAR24-V01.pdf

Table 14.3.5.2: Summary of Clinical Laboratory Test Results

|                         | Naive<br>(N=13)  | Biologic<br>(N=22) | Multiple Biologic<br>(N=17) |
|-------------------------|------------------|--------------------|-----------------------------|
| Median (Min, Max)       | -6.1 (-42, -1)   | -3.0 (-94, 2)      | -22.7 (-50, 3)              |
| Week 52: PCHG           |                  |                    |                             |
| N                       | 9                | 13                 | 10                          |
| Missing                 | 4                | 9                  | 7                           |
| Mean (SD)               | -61.8 (23.87)    | -26.8 (82.84)      | 23.1 (286.36)               |
| Median (Min, Max)       | -63.0 (-94, -22) | -60.0 (-99, 170)   | -70.7 (-93, 833)            |
| Early Termination: OBS  |                  |                    |                             |
| N                       | 0                | 3                  | 2                           |
| Missing                 | -                | -                  | -                           |
| Mean (SD)               | -                | 2.0 (0.30)         | 75.4 (101.54)               |
| Median (Min, Max)       | -                | 2.0 (2, 2)         | 75.4 (4, 147)               |
| Early Termination: CHG  |                  |                    |                             |
| N                       | 0                | 3                  | 2                           |
| Missing                 | -                | -                  | -                           |
| Mean (SD)               | -                | -3.7 (2.75)        | -30.2 (46.46)               |
| Median (Min, Max)       | -                | -3.6 (-7, -1)      | -30.2 (-63, 3)              |
| Early Termination: PCHG |                  |                    |                             |
| N                       | 0                | 3                  | 2                           |
| Missing                 | -                | -                  | -                           |
| Mean (SD)               | -                | -57.9 (23.13)      | 135.0 (233.33)              |
| Median (Min, Max)       | -                | -61.0 (-79, -33)   | 135.0 (-30, 300)            |
| Disease Flare: OBS      |                  |                    |                             |
| N                       | 0                | 0                  | 1                           |
| Missing                 | -                | -                  | -                           |
| Mean (SD)               | -                | -                  | 19.3 (-)                    |

Abbreviations: N, number of randomized subjects; n, number of subjects within each category; SD, Standard Deviation; Min, Minimum; Max, Maximum.

Program Name: MUCUS-Shell111-V01

Output Location: .\Output\Shared\MUCUS-TFLS-Final-27MAR24-V01.pdf

Table 14.3.5.2: Summary of Clinical Laboratory Test Results

|                        | Naive<br>(N=13) | Biologic<br>(N=22) | Multiple Biologic<br>(N=17) |
|------------------------|-----------------|--------------------|-----------------------------|
| Median (Min, Max)      | -               | -                  | 19.3 (19, 19)               |
| Disease Flare: CHG     |                 |                    |                             |
| N                      | 0               | 0                  | 1                           |
| Missing                | -               | -                  | -                           |
| Mean (SD)              | -               | -                  | 11.9 (-)                    |
| Median (Min, Max)      | -               | -                  | 11.9 (12, 12)               |
| Disease Flare: PCHG    |                 |                    |                             |
| N                      | 0               | 0                  | 1                           |
| Missing                | -               | -                  | -                           |
| Mean (SD)              | -               | -                  | 160.8 (-)                   |
| Median (Min, Max)      | -               | -                  | 160.8 (161, 161)            |
| Safety Follow-Up: OBS  |                 |                    |                             |
| N                      | 7               | 8                  | 10                          |
| Missing                | 6               | 14                 | 7                           |
| Mean (SD)              | 4.0 (2.81)      | 6.3 (7.91)         | 20.3 (31.20)                |
| Median (Min, Max)      | 4.6 (1, 9)      | 3.4 (1, 25)        | 5.9 (2, 91)                 |
| Safety Follow-Up: CHG  |                 |                    |                             |
| N                      | 7               | 8                  | 10                          |
| Missing                | 6               | 14                 | 7                           |
| Mean (SD)              | -19.6 (18.50)   | -23.3 (37.65)      | -27.7 (41.69)               |
| Median (Min, Max)      | -17.7 (-46, -1) | -1.5 (-88, 2)      | -29.8 (-120, 40)            |
| Safety Follow-Up: PCHG |                 |                    |                             |
| N                      | 7               | 8                  | 10                          |
| Missing                | 6               | 14                 | 7                           |
| Mean (SD)              | -71.5 (17.09)   | -19.5 (70.31)      | -43.1 (74.79)               |

Abbreviations: N, number of randomized subjects; n, number of subjects within each category; SD, Standard Deviation; Min, Minimum; Max, Maximum.

Program Name: MUCUS-Shell111-V01

Output Location: .\Output\Shared\MUCUS-TFLS-Final-27MAR24-V01.pdf



Table 14.3.5.2: Summary of Clinical Laboratory Test Results

|                    | Naive<br>(N=13)    | Biologic<br>(N=22)  | Multiple Biologic<br>(N=17) |
|--------------------|--------------------|---------------------|-----------------------------|
| Median (Min, Max)  | -67.0 (-89, -45)   | -30.0 (-95, 78)     | -70.7 (-94, 154)            |
| Fecal Calprotectin |                    |                     |                             |
| Baseline: OBS      |                    |                     |                             |
| N                  | 12                 | 20                  | 15                          |
| Missing            | 1                  | 2                   | 2                           |
| Mean (SD)          | 648.0 (791.44)     | 875.3 (954.21)      | 1170.5 (986.69)             |
| Median (Min, Max)  | 247.0 (50, 2000)   | 584.5 (5, 4030)     | 800.0 (15, 3000)            |
| Week 8: OBS        |                    |                     |                             |
| N                  | 10                 | 13                  | 12                          |
| Missing            | 3                  | 9                   | 5                           |
| Mean (SD)          | 226.8 (231.68)     | 382.9 (529.73)      | 773.4 (851.40)              |
| Median (Min, Max)  | 177.5 (35, 804)    | 154.0 (50, 2000)    | 406.0 (28, 2100)            |
| Week 8: CHG        |                    |                     |                             |
| N                  | 10                 | 13                  | 11                          |
| Missing            | 3                  | 9                   | 6                           |
| Mean (SD)          | -343.1 (654.65)    | -457.8 (1163.07)    | -288.3 (493.39)             |
| Median (Min, Max)  | -75.3 (-1783, 305) | -127.0 (-3797, 562) | -22.0 (-1440, 286)          |
| Week 8: PCHG       |                    |                     |                             |
| N                  | 10                 | 13                  | 11                          |
| Missing            | 3                  | 9                   | 6                           |
| Mean (SD)          | 28.2 (211.43)      | 829.9 (3128.23)     | -20.7 (51.99)               |
| Median (Min, Max)  | -50.7 (-90, 610)   | -45.2 (-94, 11240)  | -22.7 (-94, 101)            |
| Week 16: OBS       |                    |                     |                             |
| N                  | 7                  | 13                  | 10                          |
| Missing            | 6                  | 9                   | 7                           |

Abbreviations: N, number of randomized subjects; n, number of subjects within each category; SD, Standard Deviation; Min, Minimum; Max, Maximum.

Program Name: MUCUS-Shell111-V01

Output Location: .\Output\Shared\MUCUS-TFLS-Final-27MAR24-V01.pdf

Table 14.3.5.2: Summary of Clinical Laboratory Test Results

|                   | Naive<br>(N=13)   | Biologic<br>(N=22)   | Multiple Biologic<br>(N=17) |
|-------------------|-------------------|----------------------|-----------------------------|
| Mean (SD)         | 235.3 (216.03)    | 345.1 (533.37)       | 858.7 (727.58)              |
| Median (Min, Max) | 162.0 (74, 650)   | 206.0 (50, 2000)     | 723.7 (50, 2000)            |
| Week 16: CHG      |                   |                      |                             |
| N                 | 7                 | 13                   | 8                           |
| Missing           | 6                 | 9                    | 9                           |
| Mean (SD)         | 12.8 (177.21)     | -540.0 (1273.02)     | -403.1 (587.14)             |
| Median (Min, Max) | -7.0 (-182, 355)  | -225.0 (-3824, 1795) | -50.0 (-1264, 119)          |
| Week 16: PCHG     |                   |                      |                             |
| N                 | 7                 | 13                   | 8                           |
| Missing           | 6                 | 9                    | 9                           |
| Mean (SD)         | 96.0 (275.38)     | 434.6 (1562.25)      | -8.9 (45.61)                |
| Median (Min, Max) | -7.4 (-66, 710)   | -77.0 (-95, 5560)    | -2.4 (-63, 61)              |
| Week 26: OBS      |                   |                      |                             |
| N                 | 5                 | 7                    | 6                           |
| Missing           | 8                 | 15                   | 11                          |
| Mean (SD)         | 97.8 (69.53)      | 163.1 (90.43)        | 605.8 (667.57)              |
| Median (Min, Max) | 80.9 (20, 186)    | 185.0 (63, 298)      | 489.5 (50, 1800)            |
| Week 26: CHG      |                   |                      |                             |
| N                 | 5                 | 7                    | 5                           |
| Missing           | 8                 | 15                   | 12                          |
| Mean (SD)         | -116.0 (113.73)   | -513.8 (585.30)      | -164.2 (313.89)             |
| Median (Min, Max) | -125.0 (-269, 50) | -459.0 (-1398, 293)  | -44.0 (-724, 0)             |
| Week 26: PCHG     |                   |                      |                             |
| N                 | 5                 | 7                    | 5                           |
| Missing           | 8                 | 15                   | 12                          |

Abbreviations: N, number of randomized subjects; n, number of subjects within each category; SD, Standard Deviation; Min, Minimum; Max, Maximum.

Program Name: MUCUS-Shell111-V01

Output Location: .\Output\Shared\MUCUS-TFLS-Final-27MAR24-V01.pdf

Table 14.3.5.2: Summary of Clinical Laboratory Test Results

|                   | Naive<br>(N=13)     | Biologic<br>(N=22)  | Multiple Biologic<br>(N=17) |
|-------------------|---------------------|---------------------|-----------------------------|
| Mean (SD)         | -47.7 (49.99)       | 777.7 (2241.34)     | -23.6 (39.86)               |
| Median (Min, Max) | -62.7 (-84, 37)     | -82.5 (-94, 5860)   | -5.5 (-94, 0)               |
| Week 36: OBS      |                     |                     |                             |
| N                 | 6                   | 8                   | 6                           |
| Missing           | 7                   | 14                  | 11                          |
| Mean (SD)         | 153.0 (147.79)      | 347.4 (592.43)      | 451.9 (493.80)              |
| Median (Min, Max) | 67.0 (50, 367)      | 166.0 (50, 1800)    | 268.0 (50, 1292)            |
| Week 36: CHG      |                     |                     |                             |
| N                 | 6                   | 8                   | 5                           |
| Missing           | 7                   | 14                  | 12                          |
| Mean (SD)         | -321.0 (689.78)     | -690.0 (1366.23)    | -459.6 (617.16)             |
| Median (Min, Max) | -156.0 (-1663, 317) | -412.0 (-3760, 810) | -507.8 (-1317, 251)         |
| Week 36: PCHG     |                     |                     |                             |
| N                 | 6                   | 8                   | 5                           |
| Missing           | 7                   | 14                  | 12                          |
| Mean (SD)         | 53.7 (286.15)       | 460.5 (1471.76)     | 14.9 (140.83)               |
| Median (Min, Max) | -72.2 (-84, 634)    | -79.9 (-94, 4100)   | -28.2 (-94, 259)            |
| Week 52: OBS      |                     |                     |                             |
| N                 | 6                   | 6                   | 8                           |
| Missing           | 7                   | 16                  | 9                           |
| Mean (SD)         | 676.7 (773.45)      | 375.5 (598.72)      | 826.3 (789.84)              |
| Median (Min, Max) | 369.5 (50, 2000)    | 159.5 (5, 1584)     | 654.3 (14, 2000)            |
| Week 52: CHG      |                     |                     |                             |
| N                 | 6                   | 5                   | 7                           |
| Missing           | 7                   | 17                  | 10                          |

Abbreviations: N, number of randomized subjects; n, number of subjects within each category; SD, Standard Deviation; Min, Minimum; Max, Maximum.

Program Name: MUCUS-Shell111-V01

Output Location: .\Output\Shared\MUCUS-TFLS-Final-27MAR24-V01.pdf

Table 14.3.5.2: Summary of Clinical Laboratory Test Results

|                         | Naive<br>(N=13)    | Biologic<br>(N=22) | Multiple Biologic<br>(N=17) |
|-------------------------|--------------------|--------------------|-----------------------------|
| Mean (SD)               | -194.3 (463.97)    | -1278.2 (1510.93)  | -308.1 (930.44)             |
| Median (Min, Max)       | -172.0 (-829, 521) | -674.0 (-3837, 77) | -100.0 (-1724, 917)         |
| Week 52: PCHG           |                    |                    |                             |
| N                       | 6                  | 5                  | 7                           |
| Missing                 | 7                  | 17                 | 10                          |
| Mean (SD)               | 130.8 (447.36)     | 235.6 (729.20)     | 34.1 (139.41)               |
| Median (Min, Max)       | -52.7 (-77, 1042)  | -84.3 (-99, 1540)  | -4.8 (-91, 324)             |
| Early Termination: OBS  |                    |                    |                             |
| N                       | 0                  | 3                  | 1                           |
| Missing                 | -                  | -                  | -                           |
| Mean (SD)               | -                  | 155.8 (96.32)      | 348.0 (-)                   |
| Median (Min, Max)       | -                  | 140.0 (68, 259)    | 348.0 (348, 348)            |
| Early Termination: CHG  |                    |                    |                             |
| N                       | 0                  | 3                  | 1                           |
| Missing                 | -                  | -                  | -                           |
| Mean (SD)               | -                  | -87.9 (235.88)     | 251.0 (-)                   |
| Median (Min, Max)       | -                  | -141.0 (-293, 170) | 251.0 (251, 251)            |
| Early Termination: PCHG |                    |                    |                             |
| N                       | 0                  | 3                  | 1                           |
| Missing                 | -                  | -                  | -                           |
| Mean (SD)               | -                  | 19.9 (148.97)      | 258.8 (-)                   |
| Median (Min, Max)       | -                  | -50.2 (-81, 191)   | 258.8 (259, 259)            |
| Disease Flare: OBS      |                    |                    |                             |
| N                       | 0                  | 0                  | 0                           |
| Missing                 | -                  | -                  | -                           |

Abbreviations: N, number of randomized subjects; n, number of subjects within each category; SD, Standard Deviation; Min, Minimum; Max, Maximum.

Program Name: MUCUS-Shell111-V01

Output Location: .\Output\Shared\MUCUS-TFLS-Final-27MAR24-V01.pdf

Table 14.3.5.2: Summary of Clinical Laboratory Test Results

|                        | Naive<br>(N=13)      | Biologic<br>(N=22)  | Multiple Biologic<br>(N=17) |
|------------------------|----------------------|---------------------|-----------------------------|
| Mean (SD)              | -                    | -                   | -                           |
| Median (Min, Max)      | -                    | -                   | -                           |
| Disease Flare: CHG     |                      |                     |                             |
| N                      | 0                    | 0                   | 0                           |
| Missing                | -                    | -                   | -                           |
| Mean (SD)              | -                    | -                   | -                           |
| Median (Min, Max)      | -                    | -                   | -                           |
| Disease Flare: PCHG    |                      |                     |                             |
| N                      | 0                    | 0                   | 0                           |
| Missing                | -                    | -                   | -                           |
| Mean (SD)              | -                    | -                   | -                           |
| Median (Min, Max)      | -                    | -                   | -                           |
| Safety Follow-Up: OBS  |                      |                     |                             |
| N                      | 3                    | 5                   | 6                           |
| Missing                | 10                   | 17                  | 11                          |
| Mean (SD)              | 1386.4 (543.05)      | 679.5 (814.40)      | 743.9 (974.99)              |
| Median (Min, Max)      | 1191.7 (968, 2000)   | 335.0 (10, 2000)    | 174.0 (12, 2000)            |
| Safety Follow-Up: CHG  |                      |                     |                             |
| N                      | 3                    | 5                   | 5                           |
| Missing                | 10                   | 17                  | 12                          |
| Mean (SD)              | 678.6 (1525.11)      | -1148.9 (1509.42)   | -451.8 (810.08)             |
| Median (Min, Max)      | 1098.1 (-1012, 1950) | -655.0 (-3695, 310) | -100.0 (-1896, 0)           |
| Safety Follow-Up: PCHG |                      |                     |                             |
| N                      | 3                    | 5                   | 5                           |
| Missing                | 10                   | 17                  | 12                          |

Abbreviations: N, number of randomized subjects; n, number of subjects within each category; SD, Standard Deviation; Min, Minimum; Max, Maximum.

Program Name: MUCUS-Shell111-V01

Output Location: .\Output\Shared\MUCUS-TFLS-Final-27MAR24-V01.pdf

Table 14.3.5.2: Summary of Clinical Laboratory Test Results

|                   | Naive<br>(N=13)    | Biologic<br>(N=22) | Multiple Biologic<br>(N=17) |
|-------------------|--------------------|--------------------|-----------------------------|
| Mean (SD)         | 1674.0 (2022.62)   | -60.3 (49.38)      | -36.7 (39.53)               |
| Median (Min, Max) | 1173.2 (-51, 3900) | -88.1 (-98, 18)    | -26.9 (-95, 0)              |
| Hemoglobin        |                    |                    |                             |
| Baseline: OBS     |                    |                    |                             |
| N                 | 13                 | 22                 | 17                          |
| Missing           | 0                  | 0                  | 0                           |
| Mean (SD)         | 10.3 (2.99)        | 11.4 (3.91)        | 9.8 (2.87)                  |
| Median (Min, Max) | 11.0 (7, 14)       | 12.3 (3, 19)       | 9.2 (6, 15)                 |
| Week 8: OBS       |                    |                    |                             |
| N                 | 12                 | 20                 | 14                          |
| Missing           | 1                  | 2                  | 3                           |
| Mean (SD)         | 10.9 (3.39)        | 11.8 (3.53)        | 10.2 (2.69)                 |
| Median (Min, Max) | 11.0 (7, 15)       | 13.0 (4, 16)       | 9.4 (6, 15)                 |
| Week 8: CHG       |                    |                    |                             |
| N                 | 12                 | 20                 | 14                          |
| Missing           | 1                  | 2                  | 3                           |
| Mean (SD)         | 0.7 (1.07)         | 0.4 (1.24)         | 0.4 (0.87)                  |
| Median (Min, Max) | 0.5 (-1, 2)        | 0.4 (-3, 3)        | 0.5 (-2, 1)                 |
| Week 8: PCHG      |                    |                    |                             |
| N                 | 12                 | 20                 | 14                          |
| Missing           | 1                  | 2                  | 3                           |
| Mean (SD)         | 7.2 (13.43)        | 7.9 (25.45)        | 5.4 (9.22)                  |
| Median (Min, Max) | 3.6 (-13, 37)      | 3.1 (-18, 111)     | 5.1 (-19, 21)               |
| Week 16: OBS      |                    |                    |                             |
| N                 | 8                  | 18                 | 12                          |

Abbreviations: N, number of randomized subjects; n, number of subjects within each category; SD, Standard Deviation; Min, Minimum; Max, Maximum.

Program Name: MUCUS-Shell111-V01

Output Location: .\Output\Shared\MUCUS-TFLS-Final-27MAR24-V01.pdf

Table 14.3.5.2: Summary of Clinical Laboratory Test Results

|                   | Naive<br>(N=13) | Biologic<br>(N=22) | Multiple Biologic<br>(N=17) |
|-------------------|-----------------|--------------------|-----------------------------|
| Missing           | 5               | 4                  | 5                           |
| Mean (SD)         | 12.0 (3.35)     | 12.2 (3.02)        | 10.2 (2.96)                 |
| Median (Min, Max) | 13.8 (8, 15)    | 12.7 (7, 17)       | 10.0 (6, 16)                |
| Week 16: CHG      |                 |                    |                             |
| N                 | 8               | 18                 | 12                          |
| Missing           | 5               | 4                  | 5                           |
| Mean (SD)         | 0.8 (0.79)      | 0.5 (1.63)         | 0.7 (0.98)                  |
| Median (Min, Max) | 0.4 (0, 2)      | 0.3 (-4, 5)        | 0.6 (-1, 2)                 |
| Week 16: PCHG     |                 |                    |                             |
| N                 | 8               | 18                 | 12                          |
| Missing           | 5               | 4                  | 5                           |
| Mean (SD)         | 6.6 (6.56)      | 12.4 (39.49)       | 7.1 (9.11)                  |
| Median (Min, Max) | 4.2 (1, 20)     | 2.6 (-21, 167)     | 9.7 (-13, 21)               |
| Week 26: OBS      |                 |                    |                             |
| N                 | 6               | 10                 | 6                           |
| Missing           | 7               | 12                 | 11                          |
| Mean (SD)         | 13.3 (2.94)     | 12.5 (2.65)        | 12.3 (3.08)                 |
| Median (Min, Max) | 14.3 (8, 15)    | 13.7 (8, 15)       | 13.1 (7, 15)                |
| Week 26: CHG      |                 |                    |                             |
| N                 | 6               | 10                 | 6                           |
| Missing           | 7               | 12                 | 11                          |
| Mean (SD)         | 1.1 (0.71)      | 0.0 (1.94)         | 0.8 (0.57)                  |
| Median (Min, Max) | 0.8 (1, 2)      | 0.1 (-5, 3)        | 1.1 (0, 1)                  |
| Week 26: PCHG     |                 |                    |                             |
| N                 | 6               | 10                 | 6                           |

Abbreviations: N, number of randomized subjects; n, number of subjects within each category; SD, Standard Deviation; Min, Minimum; Max, Maximum.

Program Name: MUCUS-Shell111-V01

Output Location: .\Output\Shared\MUCUS-TFLS-Final-27MAR24-V01.pdf

Table 14.3.5.2: Summary of Clinical Laboratory Test Results

|                   | Naive<br>(N=13) | Biologic<br>(N=22) | Multiple Biologic<br>(N=17) |
|-------------------|-----------------|--------------------|-----------------------------|
| Missing           | 7               | 12                 | 11                          |
| Mean (SD)         | 9.2 (6.15)      | 2.1 (13.11)        | 6.6 (4.73)                  |
| Median (Min, Max) | 6.7 (3, 20)     | 0.7 (-25, 28)      | 7.7 (0, 13)                 |
| Week 36: OBS      |                 |                    |                             |
| N                 | 8               | 10                 | 9                           |
| Missing           | 5               | 12                 | 8                           |
| Mean (SD)         | 12.5 (2.61)     | 13.0 (2.94)        | 11.9 (2.94)                 |
| Median (Min, Max) | 13.3 (8, 15)    | 13.8 (8, 16)       | 12.5 (7, 16)                |
| Week 36: CHG      |                 |                    |                             |
| N                 | 8               | 10                 | 9                           |
| Missing           | 5               | 12                 | 8                           |
| Mean (SD)         | 1.1 (0.83)      | 0.2 (1.67)         | 0.8 (1.02)                  |
| Median (Min, Max) | 1.1 (0, 3)      | 0.0 (-3, 3)        | 0.7 (-1, 2)                 |
| Week 36: PCHG     |                 |                    |                             |
| N                 | 8               | 10                 | 9                           |
| Missing           | 5               | 12                 | 8                           |
| Mean (SD)         | 11.4 (12.91)    | 3.0 (12.51)        | 7.0 (9.06)                  |
| Median (Min, Max) | 7.9 (1, 42)     | 0.3 (-18, 31)      | 5.1 (-5, 21)                |
| Week 52: OBS      |                 |                    |                             |
| N                 | 9               | 13                 | 10                          |
| Missing           | 4               | 9                  | 7                           |
| Mean (SD)         | 11.1 (2.90)     | 11.9 (3.05)        | 10.6 (2.15)                 |
| Median (Min, Max) | 12.3 (7, 15)    | 12.7 (7, 17)       | 9.8 (9, 14)                 |
| Week 52: CHG      |                 |                    |                             |
| N                 | 9               | 13                 | 10                          |

Abbreviations: N, number of randomized subjects; n, number of subjects within each category; SD, Standard Deviation; Min, Minimum; Max, Maximum.

Program Name: MUCUS-Shell111-V01

Output Location: .\Output\Shared\MUCUS-TFLS-Final-27MAR24-V01.pdf



Table 14.3.5.2: Summary of Clinical Laboratory Test Results

|                         | Naive<br>(N=13) | Biologic<br>(N=22) | Multiple Biologic<br>(N=17) |
|-------------------------|-----------------|--------------------|-----------------------------|
| Missing                 | 4               | 9                  | 7                           |
| Mean (SD)               | 1.0 (0.89)      | 0.8 (2.03)         | 1.0 (0.74)                  |
| Median (Min, Max)       | 1.1 (-0, 2)     | 0.5 (-4, 5)        | 0.8 (0, 2)                  |
| Week 52: PCHG           |                 |                    |                             |
| N                       | 9               | 13                 | 10                          |
| Missing                 | 4               | 9                  | 7                           |
| Mean (SD)               | 11.8 (11.85)    | 19.3 (47.43)       | 12.9 (11.80)                |
| Median (Min, Max)       | 9.0 (-2, 37)    | 5.5 (-19, 170)     | 9.4 (2, 37)                 |
| Early Termination: OBS  |                 |                    |                             |
| N                       | 0               | 3                  | 2                           |
| Missing                 | -               | -                  | -                           |
| Mean (SD)               | -               | 14.6 (0.90)        | 10.6 (4.31)                 |
| Median (Min, Max)       | -               | 14.1 (14, 16)      | 10.6 (8, 14)                |
| Early Termination: CHG  |                 |                    |                             |
| N                       | 0               | 3                  | 2                           |
| Missing                 | -               | -                  | -                           |
| Mean (SD)               | -               | 0.0 (0.40)         | 2.0 (0.21)                  |
| Median (Min, Max)       | -               | 0.1 (-0, 0)        | 2.0 (2, 2)                  |
| Early Termination: PCHG |                 |                    |                             |
| N                       | 0               | 3                  | 2                           |
| Missing                 | -               | -                  | -                           |
| Mean (SD)               | -               | 0.4 (2.73)         | 24.9 (9.42)                 |
| Median (Min, Max)       | -               | 0.7 (-3, 3)        | 24.9 (18, 32)               |
| Disease Flare: OBS      |                 |                    |                             |
| N                       | 0               | 0                  | 1                           |

Abbreviations: N, number of randomized subjects; n, number of subjects within each category; SD, Standard Deviation; Min, Minimum; Max, Maximum.

Program Name: MUCUS-Shell111-V01

Output Location: .\Output\Shared\MUCUS-TFLS-Final-27MAR24-V01.pdf

Table 14.3.5.2: Summary of Clinical Laboratory Test Results

|                        | Naive<br>(N=13) | Biologic<br>(N=22) | Multiple Biologic<br>(N=17) |
|------------------------|-----------------|--------------------|-----------------------------|
| Missing                | -               | -                  | -                           |
| Mean (SD)              | -               | -                  | 14.3 (-)                    |
| Median (Min, Max)      | -               | -                  | 14.3 (14, 14)               |
| Disease Flare: CHG     |                 |                    |                             |
| N                      | 0               | 0                  | 1                           |
| Missing                | -               | -                  | -                           |
| Mean (SD)              | -               | -                  | 0.4 (-)                     |
| Median (Min, Max)      | -               | -                  | 0.4 (0, 0)                  |
| Disease Flare: PCHG    |                 |                    |                             |
| N                      | 0               | 0                  | 1                           |
| Missing                | -               | -                  | -                           |
| Mean (SD)              | -               | -                  | 2.9 (-)                     |
| Median (Min, Max)      | -               | -                  | 2.9 (3, 3)                  |
| Safety Follow-Up: OBS  |                 |                    |                             |
| N                      | 7               | 8                  | 10                          |
| Missing                | 6               | 14                 | 7                           |
| Mean (SD)              | 10.4 (3.28)     | 10.3 (3.78)        | 10.1 (2.69)                 |
| Median (Min, Max)      | 9.2 (8, 16)     | 10.5 (5, 15)       | 9.4 (7, 15)                 |
| Safety Follow-Up: CHG  |                 |                    |                             |
| N                      | 7               | 8                  | 10                          |
| Missing                | 6               | 14                 | 7                           |
| Mean (SD)              | 0.7 (0.75)      | 0.5 (1.70)         | 1.0 (0.75)                  |
| Median (Min, Max)      | 0.6 (0, 2)      | -0.1 (-1, 4)       | 1.0 (-1, 2)                 |
| Safety Follow-Up: PCHG |                 |                    |                             |
| N                      | 7               | 8                  | 10                          |

Abbreviations: N, number of randomized subjects; n, number of subjects within each category; SD, Standard Deviation; Min, Minimum; Max, Maximum.

Program Name: MUCUS-Shell111-V01

Output Location: .\Output\Shared\MUCUS-TFLS-Final-27MAR24-V01.pdf

Table 14.3.5.2: Summary of Clinical Laboratory Test Results

|                   | Naive<br>(N=13) | Biologic<br>(N=22) | Multiple Biologic<br>(N=17) |
|-------------------|-----------------|--------------------|-----------------------------|
| Missing           | 6               | 14                 | 7                           |
| Mean (SD)         | 7.1 (5.49)      | 19.7 (58.08)       | 11.7 (10.44)                |
| Median (Min, Max) | 7.0 (0, 17)     | -2.3 (-6, 163)     | 10.2 (-6, 31)               |
| Hematocrit        |                 |                    |                             |
| Baseline: OBS     |                 |                    |                             |
| N                 | 13              | 22                 | 17                          |
| Missing           | 0               | 0                  | 0                           |
| Mean (SD)         | 23.7 (19.44)    | 30.9 (17.54)       | 22.6 (19.35)                |
| Median (Min, Max) | 35.0 (0, 44)    | 38.0 (0, 48)       | 35.5 (0, 45)                |
| Week 8: OBS       |                 |                    |                             |
| N                 | 12              | 20                 | 14                          |
| Missing           | 1               | 2                  | 3                           |
| Mean (SD)         | 27.6 (20.20)    | 32.0 (17.36)       | 20.1 (20.83)                |
| Median (Min, Max) | 40.1 (0, 45)    | 39.5 (0, 48)       | 15.1 (0, 47)                |
| Week 8: CHG       |                 |                    |                             |
| N                 | 12              | 20                 | 14                          |
| Missing           | 1               | 2                  | 3                           |
| Mean (SD)         | 4.8 (10.32)     | 2.1 (4.54)         | -1.8 (8.89)                 |
| Median (Min, Max) | 1.1 (-2, 37)    | 0.8 (-2, 20)       | 0.1 (-32, 4)                |
| Week 8: PCHG      |                 |                    |                             |
| N                 | 12              | 20                 | 14                          |
| Missing           | 1               | 2                  | 3                           |
| Mean (SD)         | 809.4 (2779.95) | 439.5 (1919.91)    | -2.2 (29.38)                |
| Median (Min, Max) | 8.0 (-11, 9637) | 5.3 (-4, 8596)     | 4.6 (-99, 29)               |

## Week 16: OBS

Abbreviations: N, number of randomized subjects; n, number of subjects within each category; SD, Standard Deviation; Min, Minimum; Max, Maximum.

Program Name: MUCUS-Shell111-V01

Output Location: .\Output\Shared\MUCUS-TFLS-Final-27MAR24-V01.pdf

Table 14.3.5.2: Summary of Clinical Laboratory Test Results

|                   | Naive<br>(N=13)  | Biologic<br>(N=22) | Multiple Biologic<br>(N=17) |
|-------------------|------------------|--------------------|-----------------------------|
| N                 | 8                | 18                 | 12                          |
| Missing           | 5                | 4                  | 5                           |
| Mean (SD)         | 26.1 (21.36)     | 32.1 (17.82)       | 19.5 (20.29)                |
| Median (Min, Max) | 39.3 (0, 44)     | 40.0 (0, 49)       | 16.4 (0, 47)                |
| Week 16: CHG      |                  |                    |                             |
| N                 | 8                | 18                 | 12                          |
| Missing           | 5                | 4                  | 5                           |
| Mean (SD)         | -3.5 (22.99)     | 1.2 (13.89)        | -2.6 (26.60)                |
| Median (Min, Max) | -0.1 (-35, 38)   | 0.6 (-37, 44)      | -0.1 (-45, 47)              |
| Week 16: PCHG     |                  |                    |                             |
| N                 | 8                | 18                 | 12                          |
| Missing           | 5                | 4                  | 5                           |
| Mean (SD)         | 1214.1 (3509.95) | 568.2 (2387.31)    | 1821.5 (4323.20)            |
| Median (Min, Max) | -0.2 (-99, 9900) | 5.4 (-99, 10133)   | 2.1 (-99, 11650)            |
| Week 26: OBS      |                  |                    |                             |
| N                 | 6                | 10                 | 6                           |
| Missing           | 7                | 12                 | 11                          |
| Mean (SD)         | 34.7 (17.01)     | 32.5 (17.09)       | 34.4 (17.14)                |
| Median (Min, Max) | 41.0 (0, 45)     | 39.9 (0, 44)       | 39.9 (0, 46)                |
| Week 26: CHG      |                  |                    |                             |
| N                 | 6                | 10                 | 6                           |
| Missing           | 7                | 12                 | 11                          |
| Mean (SD)         | 1.0 (2.55)       | -2.9 (12.10)       | 14.2 (19.91)                |
| Median (Min, Max) | 0.0 (-1, 5)      | 0.0 (-37, 6)       | 3.0 (-0, 44)                |
| Week 26: PCHG     |                  |                    |                             |

Abbreviations: N, number of randomized subjects; n, number of subjects within each category; SD, Standard Deviation; Min, Minimum; Max, Maximum.

Program Name: MUCUS-Shell111-V01

Output Location: .\Output\Shared\MUCUS-TFLS-Final-27MAR24-V01.pdf

Table 14.3.5.2: Summary of Clinical Laboratory Test Results

|                   | Naive<br>(N=13)  | Biologic<br>(N=22) | Multiple Biologic<br>(N=17) |
|-------------------|------------------|--------------------|-----------------------------|
| N                 | 6                | 10                 | 6                           |
| Missing           | 7                | 12                 | 11                          |
| Mean (SD)         | 3.2 (6.37)       | -7.0 (33.00)       | 3516.2 (5447.50)            |
| Median (Min, Max) | 1.4 (-3, 14)     | 1.4 (-99, 19)      | 7.2 (-3, 10900)             |
| Week 36: OBS      |                  |                    |                             |
| N                 | 8                | 10                 | 9                           |
| Missing           | 5                | 12                 | 8                           |
| Mean (SD)         | 31.6 (19.36)     | 37.9 (13.72)       | 31.5 (17.91)                |
| Median (Min, Max) | 41.1 (0, 45)     | 40.8 (0, 48)       | 39.0 (0, 45)                |
| Week 36: CHG      |                  |                    |                             |
| N                 | 8                | 10                 | 9                           |
| Missing           | 5                | 12                 | 8                           |
| Mean (SD)         | 2.0 (21.41)      | 2.0 (17.25)        | 10.1 (17.43)                |
| Median (Min, Max) | -0.1 (-35, 45)   | 2.0 (-37, 36)      | 1.4 (-1, 43)                |
| Week 36: PCHG     |                  |                    |                             |
| N                 | 8                | 10                 | 9                           |
| Missing           | 5                | 12                 | 8                           |
| Mean (SD)         | 1632.4 (4648.02) | 985.6 (3132.39)    | 2413.1 (4782.23)            |
| Median (Min, Max) | 2.4 (-99, 13135) | 5.3 (-99, 9900)    | 3.4 (-3, 11043)             |
| Week 52: OBS      |                  |                    |                             |
| N                 | 9                | 13                 | 10                          |
| Missing           | 4                | 9                  | 7                           |
| Mean (SD)         | 26.1 (19.41)     | 32.4 (18.49)       | 20.7 (21.50)                |
| Median (Min, Max) | 37.1 (0, 43)     | 39.9 (0, 48)       | 18.7 (0, 47)                |
| Week 52: CHG      |                  |                    |                             |

Abbreviations: N, number of randomized subjects; n, number of subjects within each category; SD, Standard Deviation; Min, Minimum; Max, Maximum.

Program Name: MUCUS-Shell111-V01

Output Location: .\Output\Shared\MUCUS-TFLS-Final-27MAR24-V01.pdf

Table 14.3.5.2: Summary of Clinical Laboratory Test Results

|                         | Naive<br>(N=13) | Biologic<br>(N=22) | Multiple Biologic<br>(N=17) |
|-------------------------|-----------------|--------------------|-----------------------------|
| N                       | 9               | 13                 | 10                          |
| Missing                 | 4               | 9                  | 7                           |
| Mean (SD)               | 0.7 (2.10)      | 5.0 (10.52)        | -2.3 (27.26)                |
| Median (Min, Max)       | 0.1 (-3, 4)     | 2.0 (-1, 39)       | 0.3 (-37, 41)               |
| Week 52: PCHG           |                 |                    |                             |
| N                       | 9               | 13                 | 10                          |
| Missing                 | 4               | 9                  | 7                           |
| Mean (SD)               | 8.1 (10.52)     | 843.5 (2971.78)    | 2062.7 (4424.95)            |
| Median (Min, Max)       | 9.3 (-7, 29)    | 6.4 (-2, 10733)    | 2.6 (-99, 10757)            |
| Early Termination: OBS  |                 |                    |                             |
| N                       | 0               | 3                  | 2                           |
| Missing                 | -               | -                  | -                           |
| Mean (SD)               | -               | 30.1 (25.88)       | 20.6 (28.66)                |
| Median (Min, Max)       | -               | 41.8 (0, 48)       | 20.6 (0, 41)                |
| Early Termination: CHG  |                 |                    |                             |
| N                       | 0               | 3                  | 2                           |
| Missing                 | -               | -                  | -                           |
| Mean (SD)               | -               | -13.8 (23.59)      | 2.7 (3.75)                  |
| Median (Min, Max)       | -               | -0.3 (-41, 0)      | 2.7 (0, 5)                  |
| Early Termination: PCHG |                 |                    |                             |
| N                       | 0               | 3                  | 2                           |
| Missing                 | -               | -                  | -                           |
| Mean (SD)               | -               | -33.2 (56.97)      | 23.7 (11.97)                |
| Median (Min, Max)       | -               | -0.7 (-99, 0)      | 23.7 (15, 32)               |

## Disease Flare: OBS

Abbreviations: N, number of randomized subjects; n, number of subjects within each category; SD, Standard Deviation; Min, Minimum; Max, Maximum.

Program Name: MUCUS-Shell111-V01

Output Location: .\Output\Shared\MUCUS-TFLS-Final-27MAR24-V01.pdf

Table 14.3.5.2: Summary of Clinical Laboratory Test Results

|                        | Naive<br>(N=13) | Biologic<br>(N=22) | Multiple Biologic<br>(N=17) |
|------------------------|-----------------|--------------------|-----------------------------|
| N                      | 0               | 0                  | 1                           |
| Missing                | -               | -                  | -                           |
| Mean (SD)              | -               | -                  | 42.5 (-)                    |
| Median (Min, Max)      | -               | -                  | 42.5 (43, 43)               |
| Disease Flare: CHG     |                 |                    |                             |
| N                      | 0               | 0                  | 1                           |
| Missing                | -               | -                  | -                           |
| Mean (SD)              | -               | -                  | 0.6 (-)                     |
| Median (Min, Max)      | -               | -                  | 0.6 (1, 1)                  |
| Disease Flare: PCHG    |                 |                    |                             |
| N                      | 0               | 0                  | 1                           |
| Missing                | -               | -                  | -                           |
| Mean (SD)              | -               | -                  | 1.4 (-)                     |
| Median (Min, Max)      | -               | -                  | 1.4 (1, 1)                  |
| Safety Follow-Up: OBS  |                 |                    |                             |
| N                      | 7               | 8                  | 10                          |
| Missing                | 6               | 14                 | 7                           |
| Mean (SD)              | 23.9 (22.34)    | 22.9 (19.81)       | 20.5 (21.31)                |
| Median (Min, Max)      | 34.0 (0, 46)    | 29.0 (0, 46)       | 18.2 (0, 46)                |
| Safety Follow-Up: CHG  |                 |                    |                             |
| N                      | 7               | 8                  | 10                          |
| Missing                | 6               | 14                 | 7                           |
| Mean (SD)              | 2.2 (23.08)     | 6.8 (14.04)        | 1.0 (32.56)                 |
| Median (Min, Max)      | -0.0 (-35, 45)  | 0.1 (-2, 36)       | -0.1 (-45, 46)              |
| Safety Follow-Up: PCHG |                 |                    |                             |

Abbreviations: N, number of randomized subjects; n, number of subjects within each category; SD, Standard Deviation; Min, Minimum; Max, Maximum.

Program Name: MUCUS-Shell111-V01

Output Location: .\Output\Shared\MUCUS-TFLS-Final-27MAR24-V01.pdf

Table 14.3.5.2: Summary of Clinical Laboratory Test Results

|                             | Naive<br>(N=13)   | Biologic<br>(N=22) | Multiple Biologic<br>(N=17) |
|-----------------------------|-------------------|--------------------|-----------------------------|
| N                           | 7                 | 8                  | 10                          |
| Missing                     | 6                 | 14                 | 7                           |
| Mean (SD)                   | 1504.6 (4017.19)  | 2436.0 (4474.45)   | 3199.4 (5219.47)            |
| Median (Min, Max)           | -1.4 (-99, 10614) | 2.5 (-5, 9900)     | 0.8 (-99, 11120)            |
| Mean Corpuscular Hemoglobin |                   |                    |                             |
| Baseline: OBS               |                   |                    |                             |
| N                           | 13                | 22                 | 17                          |
| Missing                     | 0                 | 0                  | 0                           |
| Mean (SD)                   | 16.2 (13.97)      | 26.2 (31.94)       | 13.6 (13.28)                |
| Median (Min, Max)           | 25.9 (2, 32)      | 28.2 (2, 157)      | 1.9 (1, 32)                 |
| Week 8: OBS                 |                   |                    |                             |
| N                           | 12                | 20                 | 13                          |
| Missing                     | 1                 | 2                  | 4                           |
| Mean (SD)                   | 15.1 (13.96)      | 20.9 (12.92)       | 12.8 (12.67)                |
| Median (Min, Max)           | 14.5 (2, 30)      | 28.1 (1, 33)       | 1.9 (1, 31)                 |
| Week 8: CHG                 |                   |                    |                             |
| N                           | 12                | 20                 | 13                          |
| Missing                     | 1                 | 2                  | 4                           |
| Mean (SD)                   | 0.2 (0.47)        | 0.0 (0.46)         | -0.3 (1.08)                 |
| Median (Min, Max)           | 0.1 (-0, 1)       | 0.0 (-1, 1)        | -0.0 (-2, 2)                |
| Week 8: PCHG                |                   |                    |                             |
| N                           | 12                | 20                 | 13                          |
| Missing                     | 1                 | 2                  | 4                           |
| Mean (SD)                   | 2.3 (3.37)        | -0.2 (3.35)        | -1.1 (4.97)                 |
| Median (Min, Max)           | 2.6 (-3, 8)       | 0.2 (-12, 4)       | -1.6 (-10, 10)              |

Abbreviations: N, number of randomized subjects; n, number of subjects within each category; SD, Standard Deviation; Min, Minimum; Max, Maximum.

Program Name: MUCUS-Shell111-V01  
 Output Location: .\Output\Shared\MUCUS-TFLS-Final-27MAR24-V01.pdf



Table 14.3.5.2: Summary of Clinical Laboratory Test Results

|                   | Naive<br>(N=13) | Biologic<br>(N=22) | Multiple Biologic<br>(N=17) |
|-------------------|-----------------|--------------------|-----------------------------|
| Week 16: OBS      |                 |                    |                             |
| N                 | 8               | 18                 | 12                          |
| Missing           | 5               | 4                  | 5                           |
| Mean (SD)         | 18.8 (14.06)    | 21.6 (12.76)       | 13.8 (12.99)                |
| Median (Min, Max) | 28.3 (2, 30)    | 28.7 (2, 32)       | 11.9 (1, 32)                |
| Week 16: CHG      |                 |                    |                             |
| N                 | 8               | 18                 | 12                          |
| Missing           | 5               | 4                  | 5                           |
| Mean (SD)         | 0.3 (0.78)      | 0.1 (0.91)         | -0.2 (1.07)                 |
| Median (Min, Max) | 0.1 (-1, 2)     | 0.1 (-2, 2)        | -0.0 (-3, 2)                |
| Week 16: PCHG     |                 |                    |                             |
| N                 | 8               | 18                 | 12                          |
| Missing           | 5               | 4                  | 5                           |
| Mean (SD)         | 2.0 (3.56)      | 0.3 (3.45)         | -1.1 (6.75)                 |
| Median (Min, Max) | 1.9 (-3, 7)     | 0.6 (-6, 5)        | -0.6 (-14, 9)               |
| Week 26: OBS      |                 |                    |                             |
| N                 | 6               | 10                 | 6                           |
| Missing           | 7               | 12                 | 11                          |
| Mean (SD)         | 25.0 (11.45)    | 24.2 (11.94)       | 22.6 (11.01)                |
| Median (Min, Max) | 29.7 (2, 30)    | 29.5 (2, 33)       | 25.8 (2, 32)                |
| Week 26: CHG      |                 |                    |                             |
| N                 | 6               | 10                 | 6                           |
| Missing           | 7               | 12                 | 11                          |
| Mean (SD)         | 1.4 (1.41)      | 0.2 (1.28)         | -0.0 (1.60)                 |
| Median (Min, Max) | 1.3 (-0, 3)     | 0.0 (-2, 2)        | 0.1 (-2, 3)                 |

Abbreviations: N, number of randomized subjects; n, number of subjects within each category; SD, Standard Deviation; Min, Minimum; Max, Maximum.

Program Name: MUCUS-Shell111-V01

Output Location: .\Output\Shared\MUCUS-TFLS-Final-27MAR24-V01.pdf

Table 14.3.5.2: Summary of Clinical Laboratory Test Results

|                   | Naive<br>(N=13) | Biologic<br>(N=22) | Multiple Biologic<br>(N=17) |
|-------------------|-----------------|--------------------|-----------------------------|
| Week 26: PCHG     |                 |                    |                             |
| N                 | 6               | 10                 | 6                           |
| Missing           | 7               | 12                 | 11                          |
| Mean (SD)         | 5.1 (5.60)      | 0.8 (4.87)         | 0.6 (7.14)                  |
| Median (Min, Max) | 4.3 (-1, 13)    | 0.3 (-8, 8)        | 1.1 (-9, 12)                |
| Week 36: OBS      |                 |                    |                             |
| N                 | 8               | 10                 | 9                           |
| Missing           | 5               | 12                 | 8                           |
| Mean (SD)         | 22.6 (12.86)    | 23.7 (11.79)       | 21.2 (11.79)                |
| Median (Min, Max) | 29.5 (2, 30)    | 29.1 (2, 32)       | 23.9 (1, 32)                |
| Week 36: CHG      |                 |                    |                             |
| N                 | 8               | 10                 | 9                           |
| Missing           | 5               | 12                 | 8                           |
| Mean (SD)         | 1.2 (1.19)      | -0.5 (1.67)        | 0.0 (2.23)                  |
| Median (Min, Max) | 0.8 (0, 4)      | -0.1 (-4, 3)       | 0.2 (-5, 3)                 |
| Week 36: PCHG     |                 |                    |                             |
| N                 | 8               | 10                 | 9                           |
| Missing           | 5               | 12                 | 8                           |
| Mean (SD)         | 6.6 (4.63)      | -1.8 (6.11)        | 0.6 (10.14)                 |
| Median (Min, Max) | 5.9 (1, 14)     | -0.5 (-12, 9)      | 1.4 (-20, 14)               |
| Week 52: OBS      |                 |                    |                             |
| N                 | 9               | 13                 | 10                          |
| Missing           | 4               | 9                  | 7                           |
| Mean (SD)         | 17.2 (14.61)    | 18.4 (13.77)       | 11.8 (13.17)                |
| Median (Min, Max) | 29.0 (2, 30)    | 25.9 (2, 32)       | 1.9 (2, 31)                 |

Abbreviations: N, number of randomized subjects; n, number of subjects within each category; SD, Standard Deviation; Min, Minimum; Max, Maximum.

Program Name: MUCUS-Shell111-V01

Output Location: .\Output\Shared\MUCUS-TFLS-Final-27MAR24-V01.pdf

Table 14.3.5.2: Summary of Clinical Laboratory Test Results

|                         | Naive<br>(N=13) | Biologic<br>(N=22) | Multiple Biologic<br>(N=17) |
|-------------------------|-----------------|--------------------|-----------------------------|
| Week 52: CHG            |                 |                    |                             |
| N                       | 9               | 13                 | 10                          |
| Missing                 | 4               | 9                  | 7                           |
| Mean (SD)               | 1.0 (1.23)      | -0.5 (1.75)        | 0.2 (0.92)                  |
| Median (Min, Max)       | 0.6 (0, 4)      | 0.0 (-5, 3)        | 0.1 (-1, 2)                 |
| Week 52: PCHG           |                 |                    |                             |
| N                       | 9               | 13                 | 10                          |
| Missing                 | 4               | 9                  | 7                           |
| Mean (SD)               | 6.4 (5.03)      | -0.5 (6.85)        | 4.7 (8.11)                  |
| Median (Min, Max)       | 3.5 (2, 14)     | 0.0 (-16, 11)      | 3.2 (-5, 20)                |
| Early Termination: OBS  |                 |                    |                             |
| N                       | 0               | 3                  | 2                           |
| Missing                 | -               | -                  | -                           |
| Mean (SD)               | -               | 29.6 (1.11)        | 16.1 (20.23)                |
| Median (Min, Max)       | -               | 29.4 (29, 31)      | 16.1 (2, 30)                |
| Early Termination: CHG  |                 |                    |                             |
| N                       | 0               | 3                  | 2                           |
| Missing                 | -               | -                  | -                           |
| Mean (SD)               | -               | 0.4 (0.40)         | 1.2 (1.73)                  |
| Median (Min, Max)       | -               | 0.5 (0, 1)         | 1.2 (-0, 2)                 |
| Early Termination: PCHG |                 |                    |                             |
| N                       | 0               | 3                  | 2                           |
| Missing                 | -               | -                  | -                           |
| Mean (SD)               | -               | 1.5 (1.35)         | 3.2 (7.61)                  |
| Median (Min, Max)       | -               | 1.7 (0, 3)         | 3.2 (-2, 9)                 |

Abbreviations: N, number of randomized subjects; n, number of subjects within each category; SD, Standard Deviation; Min, Minimum; Max, Maximum.

Table 14.3.5.2: Summary of Clinical Laboratory Test Results

|                       | Naive<br>(N=13) | Biologic<br>(N=22) | Multiple Biologic<br>(N=17) |
|-----------------------|-----------------|--------------------|-----------------------------|
| Disease Flare: OBS    |                 |                    |                             |
| N                     | 0               | 0                  | 1                           |
| Missing               | -               | -                  | -                           |
| Mean (SD)             | -               | -                  | 28.9 (-)                    |
| Median (Min, Max)     | -               | -                  | 28.9 (29, 29)               |
| Disease Flare: CHG    |                 |                    |                             |
| N                     | 0               | 0                  | 1                           |
| Missing               | -               | -                  | -                           |
| Mean (SD)             | -               | -                  | 0.3 (-)                     |
| Median (Min, Max)     | -               | -                  | 0.3 (0, 0)                  |
| Disease Flare: PCHG   |                 |                    |                             |
| N                     | 0               | 0                  | 1                           |
| Missing               | -               | -                  | -                           |
| Mean (SD)             | -               | -                  | 1.0 (-)                     |
| Median (Min, Max)     | -               | -                  | 1.0 (1, 1)                  |
| Safety Follow-Up: OBS |                 |                    |                             |
| N                     | 7               | 8                  | 10                          |
| Missing               | 6               | 14                 | 7                           |
| Mean (SD)             | 13.8 (14.98)    | 15.4 (14.60)       | 9.7 (12.81)                 |
| Median (Min, Max)     | 1.9 (2, 31)     | 13.8 (2, 31)       | 1.9 (2, 31)                 |
| Safety Follow-Up: CHG |                 |                    |                             |
| N                     | 7               | 8                  | 10                          |
| Missing               | 6               | 14                 | 7                           |
| Mean (SD)             | 0.7 (1.10)      | -0.7 (1.37)        | 0.3 (1.11)                  |
| Median (Min, Max)     | 0.3 (-0, 3)     | -0.0 (-4, 0)       | 0.1 (-1, 3)                 |

Abbreviations: N, number of randomized subjects; n, number of subjects within each category; SD, Standard Deviation; Min, Minimum; Max, Maximum.

Program Name: MUCUS-Shell111-V01

Output Location: .\Output\Shared\MUCUS-TFLS-Final-27MAR24-V01.pdf

Table 14.3.5.2: Summary of Clinical Laboratory Test Results

|                                           | Naive<br>(N=13) | Biologic<br>(N=22) | Multiple Biologic<br>(N=17) |
|-------------------------------------------|-----------------|--------------------|-----------------------------|
| Safety Follow-Up: PCHG                    |                 |                    |                             |
| N                                         | 7               | 8                  | 10                          |
| Missing                                   | 6               | 14                 | 7                           |
| Mean (SD)                                 | 5.1 (5.97)      | -1.4 (5.76)        | 5.8 (7.91)                  |
| Median (Min, Max)                         | 2.1 (-1, 16)    | -0.0 (-12, 7)      | 4.2 (-3, 22)                |
| Mean Corpuscular Hemoglobin Concentration |                 |                    |                             |
| Baseline: OBS                             |                 |                    |                             |
| N                                         | 13              | 22                 | 17                          |
| Missing                                   | 0               | 0                  | 0                           |
| Mean (SD)                                 | 27.0 (6.65)     | 29.3 (6.13)        | 25.7 (6.13)                 |
| Median (Min, Max)                         | 31.3 (19, 34)   | 32.6 (19, 35)      | 21.3 (19, 34)               |
| Week 8: OBS                               |                 |                    |                             |
| N                                         | 12              | 20                 | 14                          |
| Missing                                   | 1               | 2                  | 3                           |
| Mean (SD)                                 | 26.7 (6.81)     | 29.4 (5.88)        | 26.0 (6.42)                 |
| Median (Min, Max)                         | 25.9 (20, 35)   | 32.3 (18, 34)      | 25.9 (19, 34)               |
| Week 8: CHG                               |                 |                    |                             |
| N                                         | 12              | 20                 | 14                          |
| Missing                                   | 1               | 2                  | 3                           |
| Mean (SD)                                 | 0.3 (0.72)      | -0.1 (0.96)        | 0.1 (1.03)                  |
| Median (Min, Max)                         | 0.2 (-1, 1)     | 0.0 (-3, 2)        | -0.2 (-2, 2)                |
| Week 8: PCHG                              |                 |                    |                             |
| N                                         | 12              | 20                 | 14                          |
| Missing                                   | 1               | 2                  | 3                           |
| Mean (SD)                                 | 0.9 (2.51)      | -0.1 (3.03)        | 0.1 (3.84)                  |
| Median (Min, Max)                         | 0.7 (-3, 4)     | 0.0 (-7, 5)        | -0.7 (-6, 8)                |

Abbreviations: N, number of randomized subjects; n, number of subjects within each category; SD, Standard Deviation; Min, Minimum; Max, Maximum.

Program Name: MUCUS-Shell111-V01

Output Location: .\Output\Shared\MUCUS-TFLS-Final-27MAR24-V01.pdf

Table 14.3.5.2: Summary of Clinical Laboratory Test Results

|                   | Naive<br>(N=13) | Biologic<br>(N=22) | Multiple Biologic<br>(N=17) |
|-------------------|-----------------|--------------------|-----------------------------|
| Week 16: OBS      |                 |                    |                             |
| N                 | 8               | 18                 | 12                          |
| Missing           | 5               | 4                  | 5                           |
| Mean (SD)         | 28.7 (6.95)     | 29.8 (5.96)        | 26.0 (6.55)                 |
| Median (Min, Max) | 32.4 (20, 36)   | 33.1 (20, 35)      | 25.4 (19, 34)               |
| Week 16: CHG      |                 |                    |                             |
| N                 | 8               | 18                 | 12                          |
| Missing           | 5               | 4                  | 5                           |
| Mean (SD)         | 0.4 (1.32)      | 0.0 (1.75)         | 0.3 (1.01)                  |
| Median (Min, Max) | 0.3 (-2, 2)     | 0.1 (-5, 3)        | 0.3 (-1, 2)                 |
| Week 16: PCHG     |                 |                    |                             |
| N                 | 8               | 18                 | 12                          |
| Missing           | 5               | 4                  | 5                           |
| Mean (SD)         | 1.4 (4.06)      | 0.3 (5.59)         | 1.0 (4.06)                  |
| Median (Min, Max) | 1.5 (-6, 7)     | 0.4 (-16, 9)       | 1.3 (-6, 7)                 |
| Week 26: OBS      |                 |                    |                             |
| N                 | 6               | 10                 | 6                           |
| Missing           | 7               | 12                 | 11                          |
| Mean (SD)         | 32.4 (5.84)     | 31.0 (5.41)        | 30.4 (5.40)                 |
| Median (Min, Max) | 34.5 (21, 36)   | 33.3 (21, 35)      | 32.5 (20, 34)               |
| Week 26: CHG      |                 |                    |                             |
| N                 | 6               | 10                 | 6                           |
| Missing           | 7               | 12                 | 11                          |
| Mean (SD)         | 1.7 (1.43)      | 0.3 (1.33)         | 0.6 (1.03)                  |
| Median (Min, Max) | 2.0 (-0, 3)     | 0.3 (-2, 3)        | 0.5 (-0, 2)                 |

Abbreviations: N, number of randomized subjects; n, number of subjects within each category; SD, Standard Deviation; Min, Minimum; Max, Maximum.

Table 14.3.5.2: Summary of Clinical Laboratory Test Results

|                   | Naive<br>(N=13) | Biologic<br>(N=22) | Multiple Biologic<br>(N=17) |
|-------------------|-----------------|--------------------|-----------------------------|
| Week 26: PCHG     |                 |                    |                             |
| N                 | 6               | 10                 | 6                           |
| Missing           | 7               | 12                 | 11                          |
| Mean (SD)         | 5.6 (4.37)      | 1.0 (4.12)         | 2.1 (3.45)                  |
| Median (Min, Max) | 6.0 (-1, 11)    | 1.3 (-6, 8)        | 1.4 (-1, 8)                 |
| Week 36: OBS      |                 |                    |                             |
| N                 | 8               | 10                 | 9                           |
| Missing           | 5               | 12                 | 8                           |
| Mean (SD)         | 30.7 (6.27)     | 31.0 (5.41)        | 29.6 (5.95)                 |
| Median (Min, Max) | 33.8 (20, 36)   | 33.1 (21, 35)      | 32.1 (19, 35)               |
| Week 36: CHG      |                 |                    |                             |
| N                 | 8               | 10                 | 9                           |
| Missing           | 5               | 12                 | 8                           |
| Mean (SD)         | 1.1 (1.02)      | -0.2 (1.22)        | 0.6 (1.12)                  |
| Median (Min, Max) | 1.0 (-0, 3)     | -0.4 (-2, 3)       | 0.9 (-1, 3)                 |
| Week 36: PCHG     |                 |                    |                             |
| N                 | 8               | 10                 | 9                           |
| Missing           | 5               | 12                 | 8                           |
| Mean (SD)         | 3.9 (3.32)      | -0.4 (3.76)        | 2.0 (3.95)                  |
| Median (Min, Max) | 3.9 (-0, 9)     | -1.7 (-5, 8)       | 2.7 (-5, 8)                 |
| Week 52: OBS      |                 |                    |                             |
| N                 | 9               | 13                 | 10                          |
| Missing           | 4               | 9                  | 7                           |
| Mean (SD)         | 28.1 (7.05)     | 28.7 (6.62)        | 25.5 (6.16)                 |
| Median (Min, Max) | 33.0 (20, 36)   | 32.8 (20, 35)      | 21.3 (20, 34)               |

Abbreviations: N, number of randomized subjects; n, number of subjects within each category; SD, Standard Deviation; Min, Minimum; Max, Maximum.

Table 14.3.5.2: Summary of Clinical Laboratory Test Results

|                         | Naive<br>(N=13) | Biologic<br>(N=22) | Multiple Biologic<br>(N=17) |
|-------------------------|-----------------|--------------------|-----------------------------|
| Week 52: CHG            |                 |                    |                             |
| N                       | 9               | 13                 | 10                          |
| Missing                 | 4               | 9                  | 7                           |
| Mean (SD)               | 1.0 (1.01)      | 0.3 (1.13)         | 0.7 (0.68)                  |
| Median (Min, Max)       | 0.6 (-0, 3)     | 0.0 (-1, 3)        | 0.7 (-0, 2)                 |
| Week 52: PCHG           |                 |                    |                             |
| N                       | 9               | 13                 | 10                          |
| Missing                 | 4               | 9                  | 7                           |
| Mean (SD)               | 3.6 (3.33)      | 1.1 (3.84)         | 3.0 (3.04)                  |
| Median (Min, Max)       | 2.9 (-1, 10)    | 0.0 (-4, 9)        | 2.6 (-1, 7)                 |
| Early Termination: OBS  |                 |                    |                             |
| N                       | 0               | 3                  | 2                           |
| Missing                 | -               | -                  | -                           |
| Mean (SD)               | -               | 33.8 (1.15)        | 26.7 (9.33)                 |
| Median (Min, Max)       | -               | 33.7 (33, 35)      | 26.7 (20, 33)               |
| Early Termination: CHG  |                 |                    |                             |
| N                       | 0               | 3                  | 2                           |
| Missing                 | -               | -                  | -                           |
| Mean (SD)               | -               | 0.7 (1.10)         | 0.3 (0.85)                  |
| Median (Min, Max)       | -               | 1.2 (-1, 1)        | 0.3 (-0, 1)                 |
| Early Termination: PCHG |                 |                    |                             |
| N                       | 0               | 3                  | 2                           |
| Missing                 | -               | -                  | -                           |
| Mean (SD)               | -               | 2.0 (3.32)         | 0.7 (3.00)                  |
| Median (Min, Max)       | -               | 3.7 (-2, 4)        | 0.7 (-1, 3)                 |

Abbreviations: N, number of randomized subjects; n, number of subjects within each category; SD, Standard Deviation; Min, Minimum; Max, Maximum.



Table 14.3.5.2: Summary of Clinical Laboratory Test Results

|                       | Naive<br>(N=13) | Biologic<br>(N=22) | Multiple Biologic<br>(N=17) |
|-----------------------|-----------------|--------------------|-----------------------------|
| Disease Flare: OBS    |                 |                    |                             |
| N                     | 0               | 0                  | 1                           |
| Missing               | -               | -                  | -                           |
| Mean (SD)             | -               | -                  | 33.6 (-)                    |
| Median (Min, Max)     | -               | -                  | 33.6 (34, 34)               |
| Disease Flare: CHG    |                 |                    |                             |
| N                     | 0               | 0                  | 1                           |
| Missing               | -               | -                  | -                           |
| Mean (SD)             | -               | -                  | 0.4 (-)                     |
| Median (Min, Max)     | -               | -                  | 0.4 (0, 0)                  |
| Disease Flare: PCHG   |                 |                    |                             |
| N                     | 0               | 0                  | 1                           |
| Missing               | -               | -                  | -                           |
| Mean (SD)             | -               | -                  | 1.2 (-)                     |
| Median (Min, Max)     | -               | -                  | 1.2 (1, 1)                  |
| Safety Follow-Up: OBS |                 |                    |                             |
| N                     | 7               | 8                  | 10                          |
| Missing               | 6               | 14                 | 7                           |
| Mean (SD)             | 26.4 (6.86)     | 27.6 (6.71)        | 24.7 (6.26)                 |
| Median (Min, Max)     | 21.8 (21, 34)   | 26.9 (21, 36)      | 20.9 (20, 35)               |
| Safety Follow-Up: CHG |                 |                    |                             |
| N                     | 7               | 8                  | 10                          |
| Missing               | 6               | 14                 | 7                           |
| Mean (SD)             | 0.7 (0.83)      | 0.6 (1.16)         | 0.8 (1.01)                  |
| Median (Min, Max)     | 0.5 (-0, 2)     | 0.2 (-1, 2)        | 0.8 (-0, 3)                 |

Abbreviations: N, number of randomized subjects; n, number of subjects within each category; SD, Standard Deviation; Min, Minimum; Max, Maximum.

Program Name: MUCUS-Shell111-V01

Output Location: .\Output\Shared\MUCUS-TFLS-Final-27MAR24-V01.pdf

Table 14.3.5.2: Summary of Clinical Laboratory Test Results

|                         | Naive<br>(N=13) | Biologic<br>(N=22) | Multiple Biologic<br>(N=17) |
|-------------------------|-----------------|--------------------|-----------------------------|
| Safety Follow-Up: PCHG  |                 |                    |                             |
| N                       | 7               | 8                  | 10                          |
| Missing                 | 6               | 14                 | 7                           |
| Mean (SD)               | 2.9 (2.85)      | 2.5 (5.06)         | 3.4 (4.20)                  |
| Median (Min, Max)       | 2.5 (-0, 8)     | 0.7 (-2, 13)       | 2.8 (-2, 9)                 |
| Mean Corpuscular Volume |                 |                    |                             |
| Baseline: OBS           |                 |                    |                             |
| N                       | 13              | 22                 | 17                          |
| Missing                 | 0               | 0                  | 0                           |
| Mean (SD)               | 86.1 (3.97)     | 86.8 (4.37)        | 84.0 (7.39)                 |
| Median (Min, Max)       | 85.1 (80, 94)   | 87.0 (75, 95)      | 86.4 (70, 96)               |
| Week 8: OBS             |                 |                    |                             |
| N                       | 12              | 20                 | 14                          |
| Missing                 | 1               | 2                  | 3                           |
| Mean (SD)               | 86.6 (3.69)     | 87.4 (3.85)        | 83.1 (7.51)                 |
| Median (Min, Max)       | 86.8 (82, 94)   | 87.8 (79, 95)      | 84.7 (72, 95)               |
| Week 8: CHG             |                 |                    |                             |
| N                       | 12              | 20                 | 14                          |
| Missing                 | 1               | 2                  | 3                           |
| Mean (SD)               | 1.2 (3.40)      | 0.0 (2.97)         | -0.9 (2.71)                 |
| Median (Min, Max)       | 1.0 (-5, 8)     | 0.0 (-8, 7)        | -0.9 (-6, 3)                |
| Week 8: PCHG            |                 |                    |                             |
| N                       | 12              | 20                 | 14                          |
| Missing                 | 1               | 2                  | 3                           |
| Mean (SD)               | 1.5 (4.10)      | 0.1 (3.49)         | -1.1 (3.39)                 |

Abbreviations: N, number of randomized subjects; n, number of subjects within each category; SD, Standard Deviation; Min, Minimum; Max, Maximum.

Table 14.3.5.2: Summary of Clinical Laboratory Test Results

|                   | Naive<br>(N=13) | Biologic<br>(N=22) | Multiple Biologic<br>(N=17) |
|-------------------|-----------------|--------------------|-----------------------------|
| Median (Min, Max) | 1.1 (-6, 10)    | 0.0 (-9, 9)        | -1.0 (-8, 4)                |
| Week 16: OBS      |                 |                    |                             |
| N                 | 8               | 18                 | 12                          |
| Missing           | 5               | 4                  | 5                           |
| Mean (SD)         | 87.4 (4.28)     | 84.4 (13.00)       | 81.9 (8.06)                 |
| Median (Min, Max) | 87.4 (81, 95)   | 87.0 (34, 93)      | 83.0 (72, 94)               |
| Week 16: CHG      |                 |                    |                             |
| N                 | 8               | 18                 | 12                          |
| Missing           | 5               | 4                  | 5                           |
| Mean (SD)         | 0.5 (2.72)      | -3.5 (13.14)       | -1.6 (4.12)                 |
| Median (Min, Max) | 0.2 (-4, 4)     | -1.0 (-55, 6)      | -1.3 (-8, 4)                |
| Week 16: PCHG     |                 |                    |                             |
| N                 | 8               | 18                 | 12                          |
| Missing           | 5               | 4                  | 5                           |
| Mean (SD)         | 0.5 (3.16)      | -3.8 (14.84)       | -1.9 (4.97)                 |
| Median (Min, Max) | 0.2 (-5, 5)     | -1.1 (-62, 7)      | -1.4 (-9, 5)                |
| Week 26: OBS      |                 |                    |                             |
| N                 | 6               | 10                 | 6                           |
| Missing           | 7               | 12                 | 11                          |
| Mean (SD)         | 84.6 (2.64)     | 88.7 (3.69)        | 81.3 (8.86)                 |
| Median (Min, Max) | 84.4 (81, 89)   | 89.7 (84, 94)      | 81.0 (71, 94)               |
| Week 26: CHG      |                 |                    |                             |
| N                 | 6               | 10                 | 6                           |
| Missing           | 7               | 12                 | 11                          |
| Mean (SD)         | -0.5 (1.67)     | -0.2 (3.03)        | -1.3 (4.92)                 |

Abbreviations: N, number of randomized subjects; n, number of subjects within each category; SD, Standard Deviation; Min, Minimum; Max, Maximum.

Program Name: MUCUS-Shell111-V01

Output Location: .\Output\Shared\MUCUS-TFLS-Final-27MAR24-V01.pdf

Table 14.3.5.2: Summary of Clinical Laboratory Test Results

|                   | Naive<br>(N=13) | Biologic<br>(N=22) | Multiple Biologic<br>(N=17) |
|-------------------|-----------------|--------------------|-----------------------------|
| Median (Min, Max) | 0.0 (-3, 1)     | -0.5 (-6, 5)       | 0.1 (-10, 3)                |
| Week 26: PCHG     |                 |                    |                             |
| N                 | 6               | 10                 | 6                           |
| Missing           | 7               | 12                 | 11                          |
| Mean (SD)         | -0.6 (1.98)     | -0.1 (3.41)        | -1.4 (6.17)                 |
| Median (Min, Max) | 0.0 (-4, 1)     | -0.6 (-7, 6)       | 0.2 (-12, 4)                |
| Week 36: OBS      |                 |                    |                             |
| N                 | 8               | 10                 | 9                           |
| Missing           | 5               | 12                 | 8                           |
| Mean (SD)         | 86.5 (2.30)     | 87.4 (5.71)        | 82.6 (9.89)                 |
| Median (Min, Max) | 86.5 (83, 89)   | 88.2 (77, 95)      | 84.0 (68, 95)               |
| Week 36: CHG      |                 |                    |                             |
| N                 | 8               | 10                 | 9                           |
| Missing           | 5               | 12                 | 8                           |
| Mean (SD)         | 2.1 (2.30)      | -1.3 (4.08)        | -1.0 (5.71)                 |
| Median (Min, Max) | 2.1 (-2, 5)     | 0.2 (-11, 2)       | -1.3 (-13, 5)               |
| Week 36: PCHG     |                 |                    |                             |
| N                 | 8               | 10                 | 9                           |
| Missing           | 5               | 12                 | 8                           |
| Mean (SD)         | 2.5 (2.81)      | -1.5 (4.58)        | -1.2 (7.08)                 |
| Median (Min, Max) | 2.5 (-2, 6)     | 0.2 (-12, 2)       | -1.7 (-16, 7)               |
| Week 52: OBS      |                 |                    |                             |
| N                 | 9               | 13                 | 10                          |
| Missing           | 4               | 9                  | 7                           |
| Mean (SD)         | 87.2 (2.84)     | 87.0 (5.65)        | 84.3 (6.26)                 |

Abbreviations: N, number of randomized subjects; n, number of subjects within each category; SD, Standard Deviation; Min, Minimum; Max, Maximum.

Program Name: MUCUS-Shell111-V01

Output Location: .\Output\Shared\MUCUS-TFLS-Final-27MAR24-V01.pdf

Table 14.3.5.2: Summary of Clinical Laboratory Test Results

|                         | Naive<br>(N=13) | Biologic<br>(N=22) | Multiple Biologic<br>(N=17) |
|-------------------------|-----------------|--------------------|-----------------------------|
| Median (Min, Max)       | 86.0 (84, 93)   | 89.0 (78, 94)      | 85.5 (74, 94)               |
| Week 52: CHG            |                 |                    |                             |
| N                       | 9               | 13                 | 10                          |
| Missing                 | 4               | 9                  | 7                           |
| Mean (SD)               | 2.1 (2.10)      | -1.3 (4.76)        | 1.0 (4.11)                  |
| Median (Min, Max)       | 2.0 (-1, 6)     | -1.0 (-13, 7)      | 1.4 (-5, 9)                 |
| Week 52: PCHG           |                 |                    |                             |
| N                       | 9               | 13                 | 10                          |
| Missing                 | 4               | 9                  | 7                           |
| Mean (SD)               | 2.6 (2.60)      | -1.5 (5.34)        | 1.5 (5.17)                  |
| Median (Min, Max)       | 2.4 (-1, 8)     | -1.1 (-14, 8)      | 1.6 (-5, 12)                |
| Early Termination: OBS  |                 |                    |                             |
| N                       | 0               | 3                  | 2                           |
| Missing                 | -               | -                  | -                           |
| Mean (SD)               | -               | 87.5 (0.45)        | 90.3 (1.77)                 |
| Median (Min, Max)       | -               | 87.5 (87, 88)      | 90.3 (89, 92)               |
| Early Termination: CHG  |                 |                    |                             |
| N                       | 0               | 3                  | 2                           |
| Missing                 | -               | -                  | -                           |
| Mean (SD)               | -               | -0.4 (1.74)        | 2.0 (4.31)                  |
| Median (Min, Max)       | -               | -1.0 (-2, 2)       | 2.0 (-1, 5)                 |
| Early Termination: PCHG |                 |                    |                             |
| N                       | 0               | 3                  | 2                           |
| Missing                 | -               | -                  | -                           |
| Mean (SD)               | -               | -0.4 (1.99)        | 2.4 (4.96)                  |

Abbreviations: N, number of randomized subjects; n, number of subjects within each category; SD, Standard Deviation; Min, Minimum; Max, Maximum.

Program Name: MUCUS-Shell111-V01

Output Location: .\Output\Shared\MUCUS-TFLS-Final-27MAR24-V01.pdf

Table 14.3.5.2: Summary of Clinical Laboratory Test Results

|                       | Naive<br>(N=13) | Biologic<br>(N=22) | Multiple Biologic<br>(N=17) |
|-----------------------|-----------------|--------------------|-----------------------------|
| Median (Min, Max)     | -               | -1.1 (-2, 2)       | 2.4 (-1, 6)                 |
| Disease Flare: OBS    |                 |                    |                             |
| N                     | 0               | 0                  | 1                           |
| Missing               | -               | -                  | -                           |
| Mean (SD)             | -               | -                  | 86.0 (-)                    |
| Median (Min, Max)     | -               | -                  | 86.0 (86, 86)               |
| Disease Flare: CHG    |                 |                    |                             |
| N                     | 0               | 0                  | 1                           |
| Missing               | -               | -                  | -                           |
| Mean (SD)             | -               | -                  | 0.0 (-)                     |
| Median (Min, Max)     | -               | -                  | 0.0 (0, 0)                  |
| Disease Flare: PCHG   |                 |                    |                             |
| N                     | 0               | 0                  | 1                           |
| Missing               | -               | -                  | -                           |
| Mean (SD)             | -               | -                  | 0.0 (-)                     |
| Median (Min, Max)     | -               | -                  | 0.0 (0, 0)                  |
| Safety Follow-Up: OBS |                 |                    |                             |
| N                     | 7               | 8                  | 10                          |
| Missing               | 6               | 14                 | 7                           |
| Mean (SD)             | 87.7 (2.59)     | 86.2 (3.47)        | 87.3 (5.55)                 |
| Median (Min, Max)     | 87.5 (83, 91)   | 86.7 (80, 91)      | 88.5 (75, 94)               |
| Safety Follow-Up: CHG |                 |                    |                             |
| N                     | 7               | 8                  | 10                          |
| Missing               | 6               | 14                 | 7                           |
| Mean (SD)             | 1.6 (3.39)      | -3.5 (4.06)        | 1.6 (3.86)                  |

Abbreviations: N, number of randomized subjects; n, number of subjects within each category; SD, Standard Deviation; Min, Minimum; Max, Maximum.

Program Name: MUCUS-Shell111-V01

Output Location: .\Output\Shared\MUCUS-TFLS-Final-27MAR24-V01.pdf

Table 14.3.5.2: Summary of Clinical Laboratory Test Results

|                        | Naive<br>(N=13) | Biologic<br>(N=22) | Multiple Biologic<br>(N=17) |
|------------------------|-----------------|--------------------|-----------------------------|
| Median (Min, Max)      | 0.3 (-2, 8)     | -2.5 (-11, 0)      | 1.5 (-5, 9)                 |
| Safety Follow-Up: PCHG |                 |                    |                             |
| N                      | 7               | 8                  | 10                          |
| Missing                | 6               | 14                 | 7                           |
| Mean (SD)              | 2.0 (4.14)      | -3.8 (4.42)        | 2.2 (4.85)                  |
| Median (Min, Max)      | 0.3 (-2, 10)    | -2.9 (-12, 0)      | 1.7 (-5, 12)                |
| Mean Platelet Volume   |                 |                    |                             |
| Baseline: OBS          |                 |                    |                             |
| N                      | 5               | 9                  | 3                           |
| Missing                | 8               | 13                 | 14                          |
| Mean (SD)              | 10.6 (1.41)     | 10.5 (1.51)        | 10.3 (0.49)                 |
| Median (Min, Max)      | 11.2 (8, 12)    | 10.0 (8, 13)       | 10.1 (10, 11)               |
| Week 8: OBS            |                 |                    |                             |
| N                      | 4               | 6                  | 5                           |
| Missing                | 9               | 16                 | 12                          |
| Mean (SD)              | 10.4 (1.58)     | 11.2 (1.39)        | 10.0 (0.68)                 |
| Median (Min, Max)      | 10.5 (9, 12)    | 10.7 (10, 13)      | 10.2 (9, 11)                |
| Week 8: CHG            |                 |                    |                             |
| N                      | 4               | 6                  | 3                           |
| Missing                | 9               | 16                 | 14                          |
| Mean (SD)              | -0.1 (0.83)     | 0.1 (0.42)         | -0.1 (0.46)                 |
| Median (Min, Max)      | -0.0 (-1, 1)    | 0.1 (-0, 1)        | -0.2 (-1, 0)                |
| Week 8: PCHG           |                 |                    |                             |
| N                      | 4               | 6                  | 3                           |
| Missing                | 9               | 16                 | 14                          |

Abbreviations: N, number of randomized subjects; n, number of subjects within each category; SD, Standard Deviation; Min, Minimum; Max, Maximum.

Program Name: MUCUS-Shell111-V01

Output Location: .\Output\Shared\MUCUS-TFLS-Final-27MAR24-V01.pdf

Table 14.3.5.2: Summary of Clinical Laboratory Test Results

|                   | Naive<br>(N=13) | Biologic<br>(N=22) | Multiple Biologic<br>(N=17) |
|-------------------|-----------------|--------------------|-----------------------------|
| Mean (SD)         | -1.1 (7.79)     | 1.6 (3.98)         | -0.9 (4.54)                 |
| Median (Min, Max) | 0.1 (-11, 6)    | 1.2 (-3, 7)        | -1.8 (-5, 4)                |
| Week 16: OBS      |                 |                    |                             |
| N                 | 4               | 8                  | 3                           |
| Missing           | 9               | 14                 | 14                          |
| Mean (SD)         | 10.2 (1.30)     | 11.3 (0.91)        | 9.3 (0.51)                  |
| Median (Min, Max) | 10.5 (8, 12)    | 11.1 (10, 12)      | 9.2 (9, 10)                 |
| Week 16: CHG      |                 |                    |                             |
| N                 | 3               | 6                  | 2                           |
| Missing           | 10              | 16                 | 15                          |
| Mean (SD)         | -0.1 (0.29)     | 0.0 (0.83)         | -0.5 (0.42)                 |
| Median (Min, Max) | -0.3 (-0, 0)    | -0.1 (-1, 1)       | -0.5 (-1, -0)               |
| Week 16: PCHG     |                 |                    |                             |
| N                 | 3               | 6                  | 2                           |
| Missing           | 10              | 16                 | 15                          |
| Mean (SD)         | -1.0 (2.95)     | 1.2 (7.88)         | -5.0 (4.26)                 |
| Median (Min, Max) | -2.5 (-3, 2)    | -0.8 (-7, 15)      | -5.0 (-8, -2)               |
| Week 26: OBS      |                 |                    |                             |
| N                 | 4               | 5                  | 3                           |
| Missing           | 9               | 17                 | 14                          |
| Mean (SD)         | 10.9 (0.76)     | 11.0 (1.19)        | 10.0 (0.58)                 |
| Median (Min, Max) | 10.8 (10, 12)   | 10.4 (10, 13)      | 10.3 (9, 10)                |
| Week 26: CHG      |                 |                    |                             |
| N                 | 3               | 5                  | 1                           |
| Missing           | 10              | 17                 | 16                          |

Abbreviations: N, number of randomized subjects; n, number of subjects within each category; SD, Standard Deviation; Min, Minimum; Max, Maximum.

Program Name: MUCUS-Shell111-V01

Output Location: .\Output\Shared\MUCUS-TFLS-Final-27MAR24-V01.pdf



Table 14.3.5.2: Summary of Clinical Laboratory Test Results

|                   | Naive<br>(N=13) | Biologic<br>(N=22) | Multiple Biologic<br>(N=17) |
|-------------------|-----------------|--------------------|-----------------------------|
| Mean (SD)         | -0.1 (0.36)     | -0.2 (0.69)        | -0.6 (-)                    |
| Median (Min, Max) | 0.0 (-1, 0)     | -0.3 (-1, 1)       | -0.6 (-1, -1)               |
| Week 26: PCHG     |                 |                    |                             |
| N                 | 3               | 5                  | 1                           |
| Missing           | 10              | 17                 | 16                          |
| Mean (SD)         | -0.9 (3.18)     | -1.6 (6.37)        | -5.5 (-)                    |
| Median (Min, Max) | 0.0 (-4, 2)     | -2.3 (-8, 8)       | -5.5 (-6, -6)               |
| Week 36: OBS      |                 |                    |                             |
| N                 | 3               | 5                  | 4                           |
| Missing           | 10              | 17                 | 13                          |
| Mean (SD)         | 10.6 (0.55)     | 11.5 (1.12)        | 10.0 (0.14)                 |
| Median (Min, Max) | 10.6 (10, 11)   | 11.0 (10, 13)      | 10.1 (10, 10)               |
| Week 36: CHG      |                 |                    |                             |
| N                 | 2               | 5                  | 3                           |
| Missing           | 11              | 17                 | 14                          |
| Mean (SD)         | -0.6 (0.00)     | 0.3 (0.59)         | -0.3 (0.47)                 |
| Median (Min, Max) | -0.6 (-1, -1)   | 0.1 (-1, 1)        | -0.1 (-1, 0)                |
| Week 36: PCHG     |                 |                    |                             |
| N                 | 2               | 5                  | 3                           |
| Missing           | 11              | 17                 | 14                          |
| Mean (SD)         | -5.2 (0.19)     | 2.8 (5.67)         | -2.4 (4.36)                 |
| Median (Min, Max) | -5.2 (-5, -5)   | 0.8 (-4, 10)       | -1.0 (-7, 1)                |
| Week 52: OBS      |                 |                    |                             |
| N                 | 3               | 4                  | 3                           |
| Missing           | 10              | 18                 | 14                          |

Abbreviations: N, number of randomized subjects; n, number of subjects within each category; SD, Standard Deviation; Min, Minimum; Max, Maximum.

Table 14.3.5.2: Summary of Clinical Laboratory Test Results

|                         | Naive<br>(N=13) | Biologic<br>(N=22) | Multiple Biologic<br>(N=17) |
|-------------------------|-----------------|--------------------|-----------------------------|
| Mean (SD)               | 10.9 (1.00)     | 11.2 (1.18)        | 9.9 (0.66)                  |
| Median (Min, Max)       | 10.5 (10, 12)   | 10.8 (10, 13)      | 10.0 (9, 11)                |
| Week 52: CHG            |                 |                    |                             |
| N                       | 2               | 3                  | 1                           |
| Missing                 | 11              | 19                 | 16                          |
| Mean (SD)               | -0.3 (0.64)     | 0.3 (0.47)         | -0.1 (-)                    |
| Median (Min, Max)       | -0.3 (-1, 0)    | 0.1 (-0, 1)        | -0.1 (-0, -0)               |
| Week 52: PCHG           |                 |                    |                             |
| N                       | 2               | 3                  | 1                           |
| Missing                 | 11              | 19                 | 16                          |
| Mean (SD)               | -2.3 (5.62)     | 2.8 (4.83)         | -1.0 (-)                    |
| Median (Min, Max)       | -2.3 (-6, 2)    | 1.0 (-1, 8)        | -1.0 (-1, -1)               |
| Early Termination: OBS  |                 |                    |                             |
| N                       | 0               | 1                  | 1                           |
| Missing                 | -               | -                  | -                           |
| Mean (SD)               | -               | 12.1 (-)           | 10.1 (-)                    |
| Median (Min, Max)       | -               | 12.1 (12, 12)      | 10.1 (10, 10)               |
| Early Termination: CHG  |                 |                    |                             |
| N                       | 0               | 1                  | 1                           |
| Missing                 | -               | -                  | -                           |
| Mean (SD)               | -               | -0.8 (-)           | 0.1 (-)                     |
| Median (Min, Max)       | -               | -0.8 (-1, -1)      | 0.1 (0, 0)                  |
| Early Termination: PCHG |                 |                    |                             |
| N                       | 0               | 1                  | 1                           |
| Missing                 | -               | -                  | -                           |

Abbreviations: N, number of randomized subjects; n, number of subjects within each category; SD, Standard Deviation; Min, Minimum; Max, Maximum.

Program Name: MUCUS-Shell111-V01

Output Location: .\Output\Shared\MUCUS-TFLS-Final-27MAR24-V01.pdf

Table 14.3.5.2: Summary of Clinical Laboratory Test Results

|                       | Naive<br>(N=13) | Biologic<br>(N=22) | Multiple Biologic<br>(N=17) |
|-----------------------|-----------------|--------------------|-----------------------------|
| Mean (SD)             | -               | -6.2 (-)           | 1.0 (-)                     |
| Median (Min, Max)     | -               | -6.2 (-6, -6)      | 1.0 (1, 1)                  |
| Disease Flare: OBS    |                 |                    |                             |
| N                     | 0               | 0                  | 1                           |
| Missing               | -               | -                  | -                           |
| Mean (SD)             | -               | -                  | 11.1 (-)                    |
| Median (Min, Max)     | -               | -                  | 11.1 (11, 11)               |
| Disease Flare: CHG    |                 |                    |                             |
| N                     | 0               | 0                  | 1                           |
| Missing               | -               | -                  | -                           |
| Mean (SD)             | -               | -                  | 0.2 (-)                     |
| Median (Min, Max)     | -               | -                  | 0.2 (0, 0)                  |
| Disease Flare: PCHG   |                 |                    |                             |
| N                     | 0               | 0                  | 1                           |
| Missing               | -               | -                  | -                           |
| Mean (SD)             | -               | -                  | 1.8 (-)                     |
| Median (Min, Max)     | -               | -                  | 1.8 (2, 2)                  |
| Safety Follow-Up: OBS |                 |                    |                             |
| N                     | 0               | 0                  | 0                           |
| Missing               | 13              | 22                 | 17                          |
| Mean (SD)             | -               | -                  | -                           |
| Median (Min, Max)     | -               | -                  | -                           |
| Safety Follow-Up: CHG |                 |                    |                             |
| N                     | 0               | 0                  | 0                           |
| Missing               | 13              | 22                 | 17                          |

Abbreviations: N, number of randomized subjects; n, number of subjects within each category; SD, Standard Deviation; Min, Minimum; Max, Maximum.

Program Name: MUCUS-Shell111-V01

Output Location: .\Output\Shared\MUCUS-TFLS-Final-27MAR24-V01.pdf

Table 14.3.5.2: Summary of Clinical Laboratory Test Results

|                        | Naive<br>(N=13)  | Biologic<br>(N=22) | Multiple Biologic<br>(N=17) |
|------------------------|------------------|--------------------|-----------------------------|
| Mean (SD)              | -                | -                  | -                           |
| Median (Min, Max)      | -                | -                  | -                           |
| Safety Follow-Up: PCHG |                  |                    |                             |
| N                      | 0                | 0                  | 0                           |
| Missing                | 13               | 22                 | 17                          |
| Mean (SD)              | -                | -                  | -                           |
| Median (Min, Max)      | -                | -                  | -                           |
| Platelet Count         |                  |                    |                             |
| Baseline: OBS          |                  |                    |                             |
| N                      | 13               | 22                 | 17                          |
| Missing                | 0                | 0                  | 0                           |
| Mean (SD)              | 368.8 (147.52)   | 305.6 (96.57)      | 388.4 (124.51)              |
| Median (Min, Max)      | 322.0 (218, 786) | 286.5 (166, 497)   | 355.0 (240, 648)            |
| Week 8: OBS            |                  |                    |                             |
| N                      | 12               | 20                 | 14                          |
| Missing                | 1                | 2                  | 3                           |
| Mean (SD)              | 351.4 (96.01)    | 290.9 (83.50)      | 357.2 (86.14)               |
| Median (Min, Max)      | 335.5 (250, 578) | 288.0 (166, 481)   | 341.5 (214, 542)            |
| Week 8: CHG            |                  |                    |                             |
| N                      | 12               | 20                 | 14                          |
| Missing                | 1                | 2                  | 3                           |
| Mean (SD)              | -21.3 (65.73)    | -6.5 (54.74)       | -35.9 (83.73)               |
| Median (Min, Max)      | -11.5 (-208, 38) | -3.0 (-130, 131)   | -31.0 (-178, 146)           |
| Week 8: PCHG           |                  |                    |                             |
| N                      | 12               | 20                 | 14                          |

Abbreviations: N, number of randomized subjects; n, number of subjects within each category; SD, Standard Deviation; Min, Minimum; Max, Maximum.

Program Name: MUCUS-Shell111-V01

Output Location: .\Output\Shared\MUCUS-TFLS-Final-27MAR24-V01.pdf

Table 14.3.5.2: Summary of Clinical Laboratory Test Results

|                   | Naive<br>(N=13)  | Biologic<br>(N=22) | Multiple Biologic<br>(N=17) |
|-------------------|------------------|--------------------|-----------------------------|
| Missing           | 1                | 2                  | 3                           |
| Mean (SD)         | -1.9 (11.96)     | -0.4 (17.12)       | -5.5 (23.89)                |
| Median (Min, Max) | -4.1 (-26, 15)   | -1.2 (-29, 51)     | -9.0 (-45, 55)              |
| Week 16: OBS      |                  |                    |                             |
| N                 | 8                | 18                 | 12                          |
| Missing           | 5                | 4                  | 5                           |
| Mean (SD)         | 344.4 (134.69)   | 276.2 (57.19)      | 374.1 (84.53)               |
| Median (Min, Max) | 329.0 (205, 641) | 270.5 (143, 411)   | 404.5 (218, 483)            |
| Week 16: CHG      |                  |                    |                             |
| N                 | 8                | 18                 | 12                          |
| Missing           | 5                | 4                  | 5                           |
| Mean (SD)         | -22.0 (75.88)    | -16.6 (70.60)      | -36.1 (102.04)              |
| Median (Min, Max) | -11.5 (-145, 92) | 1.0 (-175, 89)     | -34.5 (-219, 127)           |
| Week 16: PCHG     |                  |                    |                             |
| N                 | 8                | 18                 | 12                          |
| Missing           | 5                | 4                  | 5                           |
| Mean (SD)         | -1.5 (18.01)     | -2.2 (19.63)       | -4.8 (26.30)                |
| Median (Min, Max) | -5.1 (-23, 33)   | 0.2 (-40, 28)      | -8.8 (-44, 48)              |
| Week 26: OBS      |                  |                    |                             |
| N                 | 6                | 10                 | 6                           |
| Missing           | 7                | 12                 | 11                          |
| Mean (SD)         | 291.3 (69.71)    | 281.4 (79.93)      | 377.8 (95.25)               |
| Median (Min, Max) | 293.5 (211, 368) | 274.0 (186, 445)   | 380.0 (263, 522)            |
| Week 26: CHG      |                  |                    |                             |
| N                 | 6                | 10                 | 6                           |

Abbreviations: N, number of randomized subjects; n, number of subjects within each category; SD, Standard Deviation; Min, Minimum; Max, Maximum.

Program Name: MUCUS-Shell111-V01

Output Location: .\Output\Shared\MUCUS-TFLS-Final-27MAR24-V01.pdf

Table 14.3.5.2: Summary of Clinical Laboratory Test Results

|                   | Naive<br>(N=13)  | Biologic<br>(N=22) | Multiple Biologic<br>(N=17) |
|-------------------|------------------|--------------------|-----------------------------|
| Missing           | 7                | 12                 | 11                          |
| Mean (SD)         | -38.5 (35.81)    | -1.5 (90.73)       | -49.7 (81.70)               |
| Median (Min, Max) | -32.5 (-97, -1)  | -9.0 (-154, 186)   | -70.5 (-129, 64)            |
| Week 26: PCHG     |                  |                    |                             |
| N                 | 6                | 10                 | 6                           |
| Missing           | 7                | 12                 | 11                          |
| Mean (SD)         | -9.9 (7.48)      | 2.5 (29.95)        | -10.9 (18.53)               |
| Median (Min, Max) | -10.1 (-21, -0)  | -4.5 (-35, 72)     | -16.6 (-33, 14)             |
| Week 36: OBS      |                  |                    |                             |
| N                 | 8                | 10                 | 9                           |
| Missing           | 5                | 12                 | 8                           |
| Mean (SD)         | 292.8 (72.33)    | 297.4 (127.39)     | 361.7 (89.47)               |
| Median (Min, Max) | 298.5 (212, 396) | 255.0 (164, 523)   | 360.0 (246, 529)            |
| Week 36: CHG      |                  |                    |                             |
| N                 | 8                | 10                 | 9                           |
| Missing           | 5                | 12                 | 8                           |
| Mean (SD)         | -51.1 (41.45)    | 3.0 (106.05)       | -43.8 (89.81)               |
| Median (Min, Max) | -43.0 (-115, -6) | 1.0 (-168, 236)    | -83.0 (-146, 116)           |
| Week 36: PCHG     |                  |                    |                             |
| N                 | 8                | 10                 | 9                           |
| Missing           | 5                | 12                 | 8                           |
| Mean (SD)         | -13.6 (9.67)     | 3.7 (35.33)        | -8.5 (24.85)                |
| Median (Min, Max) | -10.6 (-28, -3)  | 0.4 (-38, 91)      | -18.9 (-37, 43)             |
| Week 52: OBS      |                  |                    |                             |
| N                 | 9                | 13                 | 10                          |

Abbreviations: N, number of randomized subjects; n, number of subjects within each category; SD, Standard Deviation; Min, Minimum; Max, Maximum.

Program Name: MUCUS-Shell111-V01

Output Location: .\Output\Shared\MUCUS-TFLS-Final-27MAR24-V01.pdf

Table 14.3.5.2: Summary of Clinical Laboratory Test Results

|                         | Naive<br>(N=13)  | Biologic<br>(N=22) | Multiple Biologic<br>(N=17) |
|-------------------------|------------------|--------------------|-----------------------------|
| Missing                 | 4                | 9                  | 7                           |
| Mean (SD)               | 297.6 (76.04)    | 284.2 (89.36)      | 314.1 (71.67)               |
| Median (Min, Max)       | 322.0 (183, 404) | 272.0 (163, 490)   | 302.0 (211, 414)            |
| Week 52: CHG            |                  |                    |                             |
| N                       | 9                | 13                 | 10                          |
| Missing                 | 4                | 9                  | 7                           |
| Mean (SD)               | -55.1 (42.71)    | -23.8 (91.18)      | -93.9 (149.33)              |
| Median (Min, Max)       | -41.0 (-143, 8)  | -3.0 (-162, 168)   | -78.0 (-379, 147)           |
| Week 52: PCHG           |                  |                    |                             |
| N                       | 9                | 13                 | 10                          |
| Missing                 | 4                | 9                  | 7                           |
| Mean (SD)               | -15.5 (9.82)     | -3.5 (28.11)       | -16.1 (32.70)               |
| Median (Min, Max)       | -12.7 (-31, 2)   | -1.8 (-37, 65)     | -19.3 (-58, 55)             |
| Early Termination: OBS  |                  |                    |                             |
| N                       | 0                | 3                  | 2                           |
| Missing                 | -                | -                  | -                           |
| Mean (SD)               | -                | 253.7 (65.53)      | 272.0 (1.41)                |
| Median (Min, Max)       | -                | 256.0 (187, 318)   | 272.0 (271, 273)            |
| Early Termination: CHG  |                  |                    |                             |
| N                       | 0                | 3                  | 2                           |
| Missing                 | -                | -                  | -                           |
| Mean (SD)               | -                | -7.7 (5.51)        | -40.5 (60.10)               |
| Median (Min, Max)       | -                | -8.0 (-13, -2)     | -40.5 (-83, 2)              |
| Early Termination: PCHG |                  |                    |                             |
| N                       | 0                | 3                  | 2                           |

Abbreviations: N, number of randomized subjects; n, number of subjects within each category; SD, Standard Deviation; Min, Minimum; Max, Maximum.

Program Name: MUCUS-Shell111-V01

Output Location: .\Output\Shared\MUCUS-TFLS-Final-27MAR24-V01.pdf

Table 14.3.5.2: Summary of Clinical Laboratory Test Results

|                       | Naive<br>(N=13)  | Biologic<br>(N=22) | Multiple Biologic<br>(N=17) |
|-----------------------|------------------|--------------------|-----------------------------|
| Missing               | -                | -                  | -                           |
| Mean (SD)             | -                | -3.2 (2.25)        | -11.3 (17.01)               |
| Median (Min, Max)     | -                | -4.1 (-5, -1)      | -11.3 (-23, 1)              |
| Disease Flare: OBS    |                  |                    |                             |
| N                     | 0                | 0                  | 1                           |
| Missing               | -                | -                  | -                           |
| Mean (SD)             | -                | -                  | 334.0 (-)                   |
| Median (Min, Max)     | -                | -                  | 334.0 (334, 334)            |
| Disease Flare: CHG    |                  |                    |                             |
| N                     | 0                | 0                  | 1                           |
| Missing               | -                | -                  | -                           |
| Mean (SD)             | -                | -                  | -6.0 (-)                    |
| Median (Min, Max)     | -                | -                  | -6.0 (-6, -6)               |
| Disease Flare: PCHG   |                  |                    |                             |
| N                     | 0                | 0                  | 1                           |
| Missing               | -                | -                  | -                           |
| Mean (SD)             | -                | -                  | -1.8 (-)                    |
| Median (Min, Max)     | -                | -                  | -1.8 (-2, -2)               |
| Safety Follow-Up: OBS |                  |                    |                             |
| N                     | 7                | 8                  | 10                          |
| Missing               | 6                | 14                 | 7                           |
| Mean (SD)             | 314.3 (42.42)    | 276.3 (54.07)      | 294.6 (53.63)               |
| Median (Min, Max)     | 322.0 (260, 374) | 287.0 (194, 368)   | 297.5 (207, 374)            |
| Safety Follow-Up: CHG |                  |                    |                             |
| N                     | 7                | 8                  | 10                          |

Abbreviations: N, number of randomized subjects; n, number of subjects within each category; SD, Standard Deviation; Min, Minimum; Max, Maximum.



Table 14.3.5.2: Summary of Clinical Laboratory Test Results

|                        | Naive<br>(N=13)  | Biologic<br>(N=22) | Multiple Biologic<br>(N=17) |
|------------------------|------------------|--------------------|-----------------------------|
| Missing                | 6                | 14                 | 7                           |
| Mean (SD)              | -43.6 (65.88)    | -20.8 (93.38)      | -85.6 (123.56)              |
| Median (Min, Max)      | -42.0 (-158, 44) | -6.0 (-205, 109)   | -46.0 (-388, 58)            |
| Safety Follow-Up: PCHG |                  |                    |                             |
| N                      | 7                | 8                  | 10                          |
| Missing                | 6                | 14                 | 7                           |
| Mean (SD)              | -9.6 (16.40)     | -2.3 (27.31)       | -17.2 (22.30)               |
| Median (Min, Max)      | -10.6 (-36, 16)  | -1.8 (-47, 42)     | -14.2 (-60, 22)             |
| Red Blood Cell Count   |                  |                    |                             |
| Baseline: OBS          |                  |                    |                             |
| N                      | 13               | 22                 | 17                          |
| Missing                | 0                | 0                  | 0                           |
| Mean (SD)              | 4.4 (0.41)       | 4.3 (0.92)         | 4.6 (0.53)                  |
| Median (Min, Max)      | 4.4 (4, 5)       | 4.5 (2, 6)         | 4.6 (3, 5)                  |
| Week 8: OBS            |                  |                    |                             |
| N                      | 12               | 20                 | 14                          |
| Missing                | 1                | 2                  | 3                           |
| Mean (SD)              | 4.7 (0.53)       | 4.5 (0.72)         | 4.8 (0.48)                  |
| Median (Min, Max)      | 4.7 (4, 5)       | 4.6 (2, 6)         | 4.9 (4, 6)                  |
| Week 8: CHG            |                  |                    |                             |
| N                      | 12               | 20                 | 14                          |
| Missing                | 1                | 2                  | 3                           |
| Mean (SD)              | 0.2 (0.51)       | 0.3 (0.54)         | 0.3 (0.32)                  |
| Median (Min, Max)      | 0.3 (-1, 1)      | 0.1 (-0, 2)        | 0.3 (-1, 1)                 |
| Week 8: PCHG           |                  |                    |                             |

Abbreviations: N, number of randomized subjects; n, number of subjects within each category; SD, Standard Deviation; Min, Minimum; Max, Maximum.

Program Name: MUCUS-Shell111-V01

Output Location: .\Output\Shared\MUCUS-TFLS-Final-27MAR24-V01.pdf

Table 14.3.5.2: Summary of Clinical Laboratory Test Results

|                   | Naive<br>(N=13) | Biologic<br>(N=22) | Multiple Biologic<br>(N=17) |
|-------------------|-----------------|--------------------|-----------------------------|
| N                 | 12              | 20                 | 14                          |
| Missing           | 1               | 2                  | 3                           |
| Mean (SD)         | 4.8 (11.78)     | 10.3 (30.07)       | 6.8 (8.78)                  |
| Median (Min, Max) | 5.1 (-18, 26)   | 2.6 (-8, 135)      | 5.6 (-11, 29)               |
| Week 16: OBS      |                 |                    |                             |
| N                 | 8               | 18                 | 12                          |
| Missing           | 5               | 4                  | 5                           |
| Mean (SD)         | 4.8 (0.44)      | 4.6 (0.44)         | 4.8 (0.61)                  |
| Median (Min, Max) | 4.9 (4, 5)      | 4.5 (4, 6)         | 4.7 (4, 6)                  |
| Week 16: CHG      |                 |                    |                             |
| N                 | 8               | 18                 | 12                          |
| Missing           | 5               | 4                  | 5                           |
| Mean (SD)         | 0.2 (0.35)      | 0.3 (0.64)         | 0.4 (0.40)                  |
| Median (Min, Max) | 0.1 (-0, 1)     | 0.2 (-0, 3)        | 0.2 (-0, 1)                 |
| Week 16: PCHG     |                 |                    |                             |
| N                 | 8               | 18                 | 12                          |
| Missing           | 5               | 4                  | 5                           |
| Mean (SD)         | 5.1 (8.43)      | 13.1 (35.61)       | 8.9 (10.44)                 |
| Median (Min, Max) | 2.3 (-2, 23)    | 5.3 (-7, 153)      | 4.2 (-2, 29)                |
| Week 26: OBS      |                 |                    |                             |
| N                 | 6               | 10                 | 6                           |
| Missing           | 7               | 12                 | 11                          |
| Mean (SD)         | 4.8 (0.35)      | 4.5 (0.27)         | 4.9 (0.27)                  |
| Median (Min, Max) | 4.7 (5, 5)      | 4.4 (4, 5)         | 4.9 (5, 5)                  |
| Week 26: CHG      |                 |                    |                             |

Abbreviations: N, number of randomized subjects; n, number of subjects within each category; SD, Standard Deviation; Min, Minimum; Max, Maximum.

Program Name: MUCUS-Shell111-V01

Output Location: .\Output\Shared\MUCUS-TFLS-Final-27MAR24-V01.pdf

Table 14.3.5.2: Summary of Clinical Laboratory Test Results

|                   | Naive<br>(N=13) | Biologic<br>(N=22) | Multiple Biologic<br>(N=17) |
|-------------------|-----------------|--------------------|-----------------------------|
| N                 | 6               | 10                 | 6                           |
| Missing           | 7               | 12                 | 11                          |
| Mean (SD)         | 0.2 (0.29)      | 0.1 (0.30)         | 0.3 (0.28)                  |
| Median (Min, Max) | 0.1 (-0, 1)     | 0.0 (-0, 1)        | 0.3 (-0, 1)                 |
| Week 26: PCHG     |                 |                    |                             |
| N                 | 6               | 10                 | 6                           |
| Missing           | 7               | 12                 | 11                          |
| Mean (SD)         | 4.1 (6.36)      | 3.7 (7.52)         | 6.2 (6.06)                  |
| Median (Min, Max) | 3.3 (-4, 13)    | 1.0 (-7, 19)       | 7.3 (-2, 13)                |
| Week 36: OBS      |                 |                    |                             |
| N                 | 8               | 10                 | 9                           |
| Missing           | 5               | 12                 | 8                           |
| Mean (SD)         | 4.7 (0.39)      | 4.8 (0.51)         | 4.9 (0.37)                  |
| Median (Min, Max) | 4.7 (4, 5)      | 4.5 (4, 5)         | 4.9 (4, 5)                  |
| Week 36: CHG      |                 |                    |                             |
| N                 | 8               | 10                 | 9                           |
| Missing           | 5               | 12                 | 8                           |
| Mean (SD)         | 0.2 (0.43)      | 0.3 (0.27)         | 0.3 (0.27)                  |
| Median (Min, Max) | 0.0 (-0, 1)     | 0.3 (-0, 1)        | 0.3 (-0, 1)                 |
| Week 36: PCHG     |                 |                    |                             |
| N                 | 8               | 10                 | 9                           |
| Missing           | 5               | 12                 | 8                           |
| Mean (SD)         | 4.5 (10.11)     | 7.4 (6.51)         | 6.6 (6.15)                  |
| Median (Min, Max) | 0.2 (-4, 26)    | 7.2 (-2, 20)       | 5.7 (-4, 19)                |
| Week 52: OBS      |                 |                    |                             |

Abbreviations: N, number of randomized subjects; n, number of subjects within each category; SD, Standard Deviation; Min, Minimum; Max, Maximum.

Program Name: MUCUS-Shell111-V01

Output Location: .\Output\Shared\MUCUS-TFLS-Final-27MAR24-V01.pdf

Table 14.3.5.2: Summary of Clinical Laboratory Test Results

|                         | Naive<br>(N=13) | Biologic<br>(N=22) | Multiple Biologic<br>(N=17) |
|-------------------------|-----------------|--------------------|-----------------------------|
| N                       | 9               | 13                 | 10                          |
| Missing                 | 4               | 9                  | 7                           |
| Mean (SD)               | 4.6 (0.39)      | 4.8 (0.55)         | 5.0 (0.39)                  |
| Median (Min, Max)       | 4.7 (4, 5)      | 4.9 (4, 6)         | 4.9 (5, 6)                  |
| Week 52: CHG            |                 |                    |                             |
| N                       | 9               | 13                 | 10                          |
| Missing                 | 4               | 9                  | 7                           |
| Mean (SD)               | 0.2 (0.34)      | 0.6 (0.74)         | 0.4 (0.26)                  |
| Median (Min, Max)       | 0.2 (-0, 1)     | 0.4 (-0, 3)        | 0.3 (0, 1)                  |
| Week 52: PCHG           |                 |                    |                             |
| N                       | 9               | 13                 | 10                          |
| Missing                 | 4               | 9                  | 7                           |
| Mean (SD)               | 5.2 (7.83)      | 21.2 (41.24)       | 7.9 (5.90)                  |
| Median (Min, Max)       | 4.7 (-4, 19)    | 9.2 (-4, 153)      | 6.5 (2, 17)                 |
| Early Termination: OBS  |                 |                    |                             |
| N                       | 0               | 3                  | 2                           |
| Missing                 | -               | -                  | -                           |
| Mean (SD)               | -               | 4.9 (0.49)         | 4.3 (0.19)                  |
| Median (Min, Max)       | -               | 4.8 (5, 5)         | 4.3 (4, 4)                  |
| Early Termination: CHG  |                 |                    |                             |
| N                       | 0               | 3                  | 2                           |
| Missing                 | -               | -                  | -                           |
| Mean (SD)               | -               | -0.1 (0.11)        | 0.7 (0.52)                  |
| Median (Min, Max)       | -               | -0.1 (-0, 0)       | 0.7 (0, 1)                  |
| Early Termination: PCHG |                 |                    |                             |

Abbreviations: N, number of randomized subjects; n, number of subjects within each category; SD, Standard Deviation; Min, Minimum; Max, Maximum.

Program Name: MUCUS-Shell111-V01

Output Location: .\Output\Shared\MUCUS-TFLS-Final-27MAR24-V01.pdf

Table 14.3.5.2: Summary of Clinical Laboratory Test Results

|                       | Naive<br>(N=13) | Biologic<br>(N=22) | Multiple Biologic<br>(N=17) |
|-----------------------|-----------------|--------------------|-----------------------------|
| N                     | 0               | 3                  | 2                           |
| Missing               | -               | -                  | -                           |
| Mean (SD)             | -               | -1.1 (2.09)        | 22.1 (18.90)                |
| Median (Min, Max)     | -               | -2.2 (-3, 1)       | 22.1 (9, 35)                |
| Disease Flare: OBS    |                 |                    |                             |
| N                     | 0               | 0                  | 1                           |
| Missing               | -               | -                  | -                           |
| Mean (SD)             | -               | -                  | 5.0 (-)                     |
| Median (Min, Max)     | -               | -                  | 5.0 (5, 5)                  |
| Disease Flare: CHG    |                 |                    |                             |
| N                     | 0               | 0                  | 1                           |
| Missing               | -               | -                  | -                           |
| Mean (SD)             | -               | -                  | 0.1 (-)                     |
| Median (Min, Max)     | -               | -                  | 0.1 (0, 0)                  |
| Disease Flare: PCHG   |                 |                    |                             |
| N                     | 0               | 0                  | 1                           |
| Missing               | -               | -                  | -                           |
| Mean (SD)             | -               | -                  | 2.0 (-)                     |
| Median (Min, Max)     | -               | -                  | 2.0 (2, 2)                  |
| Safety Follow-Up: OBS |                 |                    |                             |
| N                     | 7               | 8                  | 10                          |
| Missing               | 6               | 14                 | 7                           |
| Mean (SD)             | 4.5 (0.57)      | 4.3 (0.85)         | 4.7 (0.60)                  |
| Median (Min, Max)     | 4.5 (4, 5)      | 4.4 (3, 5)         | 4.7 (4, 6)                  |
| Safety Follow-Up: CHG |                 |                    |                             |

Abbreviations: N, number of randomized subjects; n, number of subjects within each category; SD, Standard Deviation; Min, Minimum; Max, Maximum.

Program Name: MUCUS-Shell111-V01

Output Location: .\Output\Shared\MUCUS-TFLS-Final-27MAR24-V01.pdf

Table 14.3.5.2: Summary of Clinical Laboratory Test Results

|                             | Naive<br>(N=13) | Biologic<br>(N=22) | Multiple Biologic<br>(N=17) |
|-----------------------------|-----------------|--------------------|-----------------------------|
| N                           | 7               | 8                  | 10                          |
| Missing                     | 6               | 14                 | 7                           |
| Mean (SD)                   | 0.1 (0.38)      | 0.4 (0.85)         | 0.2 (0.25)                  |
| Median (Min, Max)           | 0.2 (-1, 1)     | 0.1 (-0, 2)        | 0.3 (-0, 1)                 |
| Safety Follow-Up: PCHG      |                 |                    |                             |
| N                           | 7               | 8                  | 10                          |
| Missing                     | 6               | 14                 | 7                           |
| Mean (SD)                   | 2.6 (8.51)      | 19.9 (49.35)       | 5.7 (6.02)                  |
| Median (Min, Max)           | 5.3 (-11, 12)   | 2.7 (-5, 141)      | 5.8 (-7, 13)                |
| Red Cell Distribution Width |                 |                    |                             |
| Baseline: OBS               |                 |                    |                             |
| N                           | 13              | 19                 | 16                          |
| Missing                     | 0               | 3                  | 1                           |
| Mean (SD)                   | 14.3 (1.52)     | 14.6 (3.31)        | 14.7 (2.55)                 |
| Median (Min, Max)           | 14.2 (13, 17)   | 13.2 (12, 23)      | 14.0 (11, 22)               |
| Week 8: OBS                 |                 |                    |                             |
| N                           | 12              | 18                 | 14                          |
| Missing                     | 1               | 4                  | 3                           |
| Mean (SD)                   | 13.9 (1.35)     | 14.2 (2.84)        | 15.5 (2.64)                 |
| Median (Min, Max)           | 13.4 (12, 16)   | 13.2 (11, 23)      | 14.7 (12, 20)               |
| Week 8: CHG                 |                 |                    |                             |
| N                           | 12              | 17                 | 13                          |
| Missing                     | 1               | 5                  | 4                           |
| Mean (SD)                   | -0.6 (1.23)     | -0.2 (1.17)        | 0.4 (2.11)                  |
| Median (Min, Max)           | -0.5 (-3, 1)    | 0.0 (-3, 2)        | 0.2 (-2, 6)                 |

Abbreviations: N, number of randomized subjects; n, number of subjects within each category; SD, Standard Deviation; Min, Minimum; Max, Maximum.

Program Name: MUCUS-Shell111-V01  
 Output Location: .\Output\Shared\MUCUS-TFLS-Final-27MAR24-V01.pdf

Table 14.3.5.2: Summary of Clinical Laboratory Test Results

|                      | Naive<br>(N=13) | Biologic<br>(N=22) | Multiple Biologic<br>(N=17) |
|----------------------|-----------------|--------------------|-----------------------------|
| <b>Week 8: PCHG</b>  |                 |                    |                             |
| N                    | 12              | 17                 | 13                          |
| Missing              | 1               | 5                  | 4                           |
| Mean (SD)            | -3.6 (8.11)     | -0.8 (6.61)        | 3.5 (14.27)                 |
| Median (Min, Max)    | -3.1 (-19, 10)  | 0.0 (-14, 12)      | 1.5 (-14, 44)               |
| <b>Week 16: OBS</b>  |                 |                    |                             |
| N                    | 7               | 16                 | 11                          |
| Missing              | 6               | 6                  | 6                           |
| Mean (SD)            | 13.0 (0.81)     | 13.1 (3.27)        | 15.8 (3.63)                 |
| Median (Min, Max)    | 13.2 (12, 14)   | 12.9 (5, 21)       | 14.9 (13, 24)               |
| <b>Week 16: CHG</b>  |                 |                    |                             |
| N                    | 7               | 15                 | 10                          |
| Missing              | 6               | 7                  | 7                           |
| Mean (SD)            | -1.0 (1.03)     | -0.9 (2.24)        | -0.2 (1.49)                 |
| Median (Min, Max)    | -0.8 (-3, 0)    | -0.2 (-8, 1)       | 0.1 (-3, 2)                 |
| <b>Week 16: PCHG</b> |                 |                    |                             |
| N                    | 7               | 15                 | 10                          |
| Missing              | 6               | 7                  | 7                           |
| Mean (SD)            | -6.9 (6.70)     | -6.3 (17.15)       | -0.5 (9.57)                 |
| Median (Min, Max)    | -5.6 (-20, 2)   | -1.7 (-64, 9)      | 0.8 (-20, 13)               |
| <b>Week 26: OBS</b>  |                 |                    |                             |
| N                    | 6               | 10                 | 6                           |
| Missing              | 7               | 12                 | 11                          |
| Mean (SD)            | 13.5 (1.30)     | 13.4 (0.93)        | 15.2 (2.92)                 |
| Median (Min, Max)    | 13.1 (12, 16)   | 13.2 (12, 16)      | 14.8 (13, 20)               |

Abbreviations: N, number of randomized subjects; n, number of subjects within each category; SD, Standard Deviation; Min, Minimum; Max, Maximum.

Program Name: MUCUS-Shell111-V01

Output Location: .\Output\Shared\MUCUS-TFLS-Final-27MAR24-V01.pdf

Table 14.3.5.2: Summary of Clinical Laboratory Test Results

|                   | Naive<br>(N=13) | Biologic<br>(N=22) | Multiple Biologic<br>(N=17) |
|-------------------|-----------------|--------------------|-----------------------------|
| Week 26: CHG      |                 |                    |                             |
| N                 | 6               | 9                  | 6                           |
| Missing           | 7               | 13                 | 11                          |
| Mean (SD)         | -0.5 (2.09)     | -0.2 (1.24)        | -0.4 (3.80)                 |
| Median (Min, Max) | -0.8 (-3, 3)    | 0.1 (-3, 1)        | -0.5 (-5, 6)                |
| Week 26: PCHG     |                 |                    |                             |
| N                 | 6               | 9                  | 6                           |
| Missing           | 7               | 13                 | 11                          |
| Mean (SD)         | -2.8 (14.83)    | -0.6 (7.55)        | 0.1 (24.01)                 |
| Median (Min, Max) | -5.4 (-18, 24)  | 0.8 (-17, 10)      | -3.3 (-23, 42)              |
| Week 36: OBS      |                 |                    |                             |
| N                 | 8               | 9                  | 9                           |
| Missing           | 5               | 13                 | 8                           |
| Mean (SD)         | 13.0 (0.66)     | 13.4 (1.04)        | 14.7 (2.12)                 |
| Median (Min, Max) | 13.1 (12, 14)   | 13.3 (12, 15)      | 13.8 (12, 18)               |
| Week 36: CHG      |                 |                    |                             |
| N                 | 8               | 8                  | 8                           |
| Missing           | 5               | 14                 | 9                           |
| Mean (SD)         | -1.6 (1.42)     | 0.4 (0.79)         | -1.0 (1.72)                 |
| Median (Min, Max) | -1.1 (-4, -0)   | 0.3 (-1, 2)        | -0.8 (-4, 1)                |
| Week 36: PCHG     |                 |                    |                             |
| N                 | 8               | 8                  | 8                           |
| Missing           | 5               | 14                 | 9                           |
| Mean (SD)         | -10.1 (8.17)    | 3.1 (6.07)         | -5.4 (9.67)                 |
| Median (Min, Max) | -8.2 (-24, -2)  | 1.8 (-5, 13)       | -5.5 (-19, 9)               |

Abbreviations: N, number of randomized subjects; n, number of subjects within each category; SD, Standard Deviation; Min, Minimum; Max, Maximum.

Program Name: MUCUS-Shell111-V01

Output Location: .\Output\Shared\MUCUS-TFLS-Final-27MAR24-V01.pdf



Table 14.3.5.2: Summary of Clinical Laboratory Test Results

|                        | Naive<br>(N=13) | Biologic<br>(N=22) | Multiple Biologic<br>(N=17) |
|------------------------|-----------------|--------------------|-----------------------------|
| Week 52: OBS           |                 |                    |                             |
| N                      | 9               | 13                 | 10                          |
| Missing                | 4               | 9                  | 7                           |
| Mean (SD)              | 12.9 (0.55)     | 13.4 (1.15)        | 14.5 (2.16)                 |
| Median (Min, Max)      | 13.1 (12, 14)   | 13.4 (12, 15)      | 14.1 (13, 20)               |
| Week 52: CHG           |                 |                    |                             |
| N                      | 9               | 11                 | 9                           |
| Missing                | 4               | 11                 | 8                           |
| Mean (SD)              | -1.6 (1.34)     | -0.6 (2.77)        | -0.4 (1.38)                 |
| Median (Min, Max)      | -1.7 (-4, 0)    | -0.1 (-9, 2)       | 0.2 (-3, 1)                 |
| Week 52: PCHG          |                 |                    |                             |
| N                      | 9               | 11                 | 9                           |
| Missing                | 4               | 11                 | 8                           |
| Mean (SD)              | -10.1 (7.91)    | -2.3 (13.87)       | -1.8 (9.03)                 |
| Median (Min, Max)      | -11.6 (-22, 3)  | -0.9 (-39, 17)     | 1.4 (-19, 8)                |
| Early Termination: OBS |                 |                    |                             |
| N                      | 0               | 2                  | 2                           |
| Missing                | -               | -                  | -                           |
| Mean (SD)              | -               | 13.2 (0.78)        | 17.5 (5.23)                 |
| Median (Min, Max)      | -               | 13.2 (13, 14)      | 17.5 (14, 21)               |
| Early Termination: CHG |                 |                    |                             |
| N                      | 0               | 2                  | 2                           |
| Missing                | -               | -                  | -                           |
| Mean (SD)              | -               | 0.6 (0.85)         | 2.3 (4.31)                  |
| Median (Min, Max)      | -               | 0.6 (0, 1)         | 2.3 (-1, 5)                 |

Abbreviations: N, number of randomized subjects; n, number of subjects within each category; SD, Standard Deviation; Min, Minimum; Max, Maximum.

Program Name: MUCUS-Shell111-V01  
 Output Location: .\Output\Shared\MUCUS-TFLS-Final-27MAR24-V01.pdf

Table 14.3.5.2: Summary of Clinical Laboratory Test Results

|                         | Naive<br>(N=13) | Biologic<br>(N=22) | Multiple Biologic<br>(N=17) |
|-------------------------|-----------------|--------------------|-----------------------------|
| Early Termination: PCHG |                 |                    |                             |
| N                       | 0               | 2                  | 2                           |
| Missing                 | -               | -                  | -                           |
| Mean (SD)               | -               | 4.8 (6.79)         | 13.9 (27.44)                |
| Median (Min, Max)       | -               | 4.8 (0, 10)        | 13.9 (-5, 33)               |
| Disease Flare: OBS      |                 |                    |                             |
| N                       | 0               | 0                  | 1                           |
| Missing                 | -               | -                  | -                           |
| Mean (SD)               | -               | -                  | 12.2 (-)                    |
| Median (Min, Max)       | -               | -                  | 12.2 (12, 12)               |
| Disease Flare: CHG      |                 |                    |                             |
| N                       | 0               | 0                  | 1                           |
| Missing                 | -               | -                  | -                           |
| Mean (SD)               | -               | -                  | -0.7 (-)                    |
| Median (Min, Max)       | -               | -                  | -0.7 (-1, -1)               |
| Disease Flare: PCHG     |                 |                    |                             |
| N                       | 0               | 0                  | 1                           |
| Missing                 | -               | -                  | -                           |
| Mean (SD)               | -               | -                  | -5.4 (-)                    |
| Median (Min, Max)       | -               | -                  | -5.4 (-5, -5)               |
| Safety Follow-Up: OBS   |                 |                    |                             |
| N                       | 7               | 8                  | 10                          |
| Missing                 | 6               | 14                 | 7                           |
| Mean (SD)               | 13.0 (0.35)     | 14.8 (3.78)        | 13.4 (1.10)                 |
| Median (Min, Max)       | 13.2 (13, 13)   | 14.2 (11, 23)      | 13.7 (12, 15)               |

Abbreviations: N, number of randomized subjects; n, number of subjects within each category; SD, Standard Deviation; Min, Minimum; Max, Maximum.

Program Name: MUCUS-Shell111-V01

Output Location: .\Output\Shared\MUCUS-TFLS-Final-27MAR24-V01.pdf

Table 14.3.5.2: Summary of Clinical Laboratory Test Results

|                        | Naive<br>(N=13) | Biologic<br>(N=22) | Multiple Biologic<br>(N=17) |
|------------------------|-----------------|--------------------|-----------------------------|
| Safety Follow-Up: CHG  |                 |                    |                             |
| N                      | 7               | 6                  | 10                          |
| Missing                | 6               | 16                 | 7                           |
| Mean (SD)              | -0.8 (1.04)     | -1.0 (2.56)        | -0.7 (1.31)                 |
| Median (Min, Max)      | -0.6 (-2, 0)    | -0.1 (-6, 1)       | 0.0 (-3, 1)                 |
| Safety Follow-Up: PCHG |                 |                    |                             |
| N                      | 7               | 6                  | 10                          |
| Missing                | 6               | 16                 | 7                           |
| Mean (SD)              | -5.6 (7.07)     | -4.3 (12.31)       | -4.3 (8.38)                 |
| Median (Min, Max)      | -4.5 (-16, 3)   | -1.1 (-27, 9)      | 0.0 (-21, 4)                |
| White Blood Cell Count |                 |                    |                             |
| Baseline: OBS          |                 |                    |                             |
| N                      | 13              | 22                 | 17                          |
| Missing                | 0               | 0                  | 0                           |
| Mean (SD)              | 10.3 (5.31)     | 8.9 (3.47)         | 9.4 (3.47)                  |
| Median (Min, Max)      | 8.2 (6, 23)     | 7.5 (5, 19)        | 9.9 (5, 17)                 |
| Week 8: OBS            |                 |                    |                             |
| N                      | 12              | 20                 | 14                          |
| Missing                | 1               | 2                  | 3                           |
| Mean (SD)              | 8.3 (2.76)      | 8.2 (2.85)         | 8.5 (1.68)                  |
| Median (Min, Max)      | 7.1 (5, 14)     | 7.5 (5, 15)        | 8.4 (6, 12)                 |
| Week 8: CHG            |                 |                    |                             |
| N                      | 12              | 20                 | 14                          |
| Missing                | 1               | 2                  | 3                           |
| Mean (SD)              | -2.2 (4.19)     | -0.7 (2.56)        | -1.5 (3.70)                 |
| Median (Min, Max)      | -0.7 (-12, 2)   | -0.2 (-9, 3)       | -0.8 (-9, 4)                |

Abbreviations: N, number of randomized subjects; n, number of subjects within each category; SD, Standard Deviation; Min, Minimum; Max, Maximum.

Table 14.3.5.2: Summary of Clinical Laboratory Test Results

|                   | Naive<br>(N=13) | Biologic<br>(N=22) | Multiple Biologic<br>(N=17) |
|-------------------|-----------------|--------------------|-----------------------------|
| Week 8: PCHG      |                 |                    |                             |
| N                 | 12              | 20                 | 14                          |
| Missing           | 1               | 2                  | 3                           |
| Mean (SD)         | -11.2 (29.80)   | -3.8 (21.59)       | -6.8 (31.02)                |
| Median (Min, Max) | -10.0 (-52, 29) | -2.2 (-51, 37)     | -8.7 (-54, 47)              |
| Week 16: OBS      |                 |                    |                             |
| N                 | 8               | 18                 | 12                          |
| Missing           | 5               | 4                  | 5                           |
| Mean (SD)         | 7.1 (1.89)      | 8.8 (3.67)         | 8.0 (2.00)                  |
| Median (Min, Max) | 6.9 (5, 10)     | 7.2 (5, 19)        | 7.4 (5, 13)                 |
| Week 16: CHG      |                 |                    |                             |
| N                 | 8               | 18                 | 12                          |
| Missing           | 5               | 4                  | 5                           |
| Mean (SD)         | -1.2 (1.75)     | -0.3 (3.89)        | -2.1 (3.79)                 |
| Median (Min, Max) | -0.9 (-5, 1)    | -0.9 (-8, 11)      | -1.7 (-10, 2)               |
| Week 16: PCHG     |                 |                    |                             |
| N                 | 8               | 18                 | 12                          |
| Missing           | 5               | 4                  | 5                           |
| Mean (SD)         | -11.2 (14.82)   | 4.4 (46.46)        | -13.0 (30.74)               |
| Median (Min, Max) | -13.8 (-35, 15) | -9.3 (-42, 156)    | -17.7 (-59, 41)             |
| Week 26: OBS      |                 |                    |                             |
| N                 | 6               | 10                 | 6                           |
| Missing           | 7               | 12                 | 11                          |
| Mean (SD)         | 6.2 (1.14)      | 10.4 (4.09)        | 8.7 (1.83)                  |
| Median (Min, Max) | 6.0 (5, 8)      | 9.6 (5, 16)        | 8.2 (6, 11)                 |

Abbreviations: N, number of randomized subjects; n, number of subjects within each category; SD, Standard Deviation; Min, Minimum; Max, Maximum.

Table 14.3.5.2: Summary of Clinical Laboratory Test Results

|                   | Naive<br>(N=13) | Biologic<br>(N=22) | Multiple Biologic<br>(N=17) |
|-------------------|-----------------|--------------------|-----------------------------|
| Week 26: CHG      |                 |                    |                             |
| N                 | 6               | 10                 | 6                           |
| Missing           | 7               | 12                 | 11                          |
| Mean (SD)         | -1.7 (2.30)     | 0.7 (3.46)         | -1.1 (3.68)                 |
| Median (Min, Max) | -0.9 (-5, 0)    | 0.7 (-4, 9)        | 0.4 (-7, 3)                 |
| Week 26: PCHG     |                 |                    |                             |
| N                 | 6               | 10                 | 6                           |
| Missing           | 7               | 12                 | 11                          |
| Mean (SD)         | -17.2 (22.64)   | 12.1 (47.43)       | -0.7 (36.55)                |
| Median (Min, Max) | -13.2 (-50, 6)  | 6.4 (-44, 134)     | 4.5 (-41, 57)               |
| Week 36: OBS      |                 |                    |                             |
| N                 | 8               | 10                 | 9                           |
| Missing           | 5               | 12                 | 8                           |
| Mean (SD)         | 7.4 (2.66)      | 8.5 (3.39)         | 8.3 (2.23)                  |
| Median (Min, Max) | 6.6 (5, 12)     | 7.5 (4, 14)        | 7.6 (5, 11)                 |
| Week 36: CHG      |                 |                    |                             |
| N                 | 8               | 10                 | 9                           |
| Missing           | 5               | 12                 | 8                           |
| Mean (SD)         | -4.1 (5.04)     | -0.6 (2.36)        | -1.4 (3.45)                 |
| Median (Min, Max) | -1.9 (-15, -0)  | -1.0 (-4, 3)       | -0.3 (-7, 3)                |
| Week 36: PCHG     |                 |                    |                             |
| N                 | 8               | 10                 | 9                           |
| Missing           | 5               | 12                 | 8                           |
| Mean (SD)         | -27.0 (22.84)   | -2.5 (32.46)       | -8.3 (31.72)                |
| Median (Min, Max) | -20.9 (-63, -5) | -9.1 (-45, 46)     | -3.9 (-55, 35)              |

Abbreviations: N, number of randomized subjects; n, number of subjects within each category; SD, Standard Deviation; Min, Minimum; Max, Maximum.

Table 14.3.5.2: Summary of Clinical Laboratory Test Results

|                        | Naive<br>(N=13) | Biologic<br>(N=22) | Multiple Biologic<br>(N=17) |
|------------------------|-----------------|--------------------|-----------------------------|
| Week 52: OBS           |                 |                    |                             |
| N                      | 9               | 13                 | 10                          |
| Missing                | 4               | 9                  | 7                           |
| Mean (SD)              | 6.8 (1.77)      | 7.9 (3.19)         | 7.0 (1.41)                  |
| Median (Min, Max)      | 7.5 (4, 9)      | 7.1 (5, 15)        | 7.0 (5, 9)                  |
| Week 52: CHG           |                 |                    |                             |
| N                      | 9               | 13                 | 10                          |
| Missing                | 4               | 9                  | 7                           |
| Mean (SD)              | -4.6 (5.11)     | -0.6 (1.65)        | -3.4 (4.11)                 |
| Median (Min, Max)      | -2.9 (-15, 1)   | -0.1 (-4, 2)       | -2.6 (-11, 1)               |
| Week 52: PCHG          |                 |                    |                             |
| N                      | 9               | 13                 | 10                          |
| Missing                | 4               | 9                  | 7                           |
| Mean (SD)              | -31.3 (24.23)   | -3.6 (19.82)       | -26.2 (27.49)               |
| Median (Min, Max)      | -26.9 (-63, 10) | -1.7 (-43, 37)     | -33.0 (-65, 21)             |
| Early Termination: OBS |                 |                    |                             |
| N                      | 0               | 3                  | 2                           |
| Missing                | -               | -                  | -                           |
| Mean (SD)              | -               | 9.4 (3.36)         | 6.0 (0.28)                  |
| Median (Min, Max)      | -               | 8.1 (7, 13)        | 6.0 (6, 6)                  |
| Early Termination: CHG |                 |                    |                             |
| N                      | 0               | 3                  | 2                           |
| Missing                | -               | -                  | -                           |
| Mean (SD)              | -               | -0.6 (1.52)        | -4.1 (0.28)                 |
| Median (Min, Max)      | -               | -0.3 (-2, 1)       | -4.1 (-4, -4)               |

Abbreviations: N, number of randomized subjects; n, number of subjects within each category; SD, Standard Deviation; Min, Minimum; Max, Maximum.

Table 14.3.5.2: Summary of Clinical Laboratory Test Results

|                         | Naive<br>(N=13) | Biologic<br>(N=22) | Multiple Biologic<br>(N=17) |
|-------------------------|-----------------|--------------------|-----------------------------|
| Early Termination: PCHG |                 |                    |                             |
| N                       | 0               | 3                  | 2                           |
| Missing                 | -               | -                  | -                           |
| Mean (SD)               | -               | -5.2 (17.90)       | -40.6 (2.80)                |
| Median (Min, Max)       | -               | -2.1 (-24, 11)     | -40.6 (-43, -39)            |
| Disease Flare: OBS      |                 |                    |                             |
| N                       | 0               | 0                  | 1                           |
| Missing                 | -               | -                  | -                           |
| Mean (SD)               | -               | -                  | 12.1 (-)                    |
| Median (Min, Max)       | -               | -                  | 12.1 (12, 12)               |
| Disease Flare: CHG      |                 |                    |                             |
| N                       | 0               | 0                  | 1                           |
| Missing                 | -               | -                  | -                           |
| Mean (SD)               | -               | -                  | 2.0 (-)                     |
| Median (Min, Max)       | -               | -                  | 2.0 (2, 2)                  |
| Disease Flare: PCHG     |                 |                    |                             |
| N                       | 0               | 0                  | 1                           |
| Missing                 | -               | -                  | -                           |
| Mean (SD)               | -               | -                  | 20.1 (-)                    |
| Median (Min, Max)       | -               | -                  | 20.1 (20, 20)               |
| Safety Follow-Up: OBS   |                 |                    |                             |
| N                       | 7               | 8                  | 10                          |
| Missing                 | 6               | 14                 | 7                           |
| Mean (SD)               | 6.5 (1.89)      | 7.0 (1.52)         | 7.7 (2.66)                  |
| Median (Min, Max)       | 6.5 (4, 10)     | 6.8 (5, 10)        | 7.1 (5, 14)                 |

Abbreviations: N, number of randomized subjects; n, number of subjects within each category; SD, Standard Deviation; Min, Minimum; Max, Maximum.

Table 14.3.5.2: Summary of Clinical Laboratory Test Results

|                        | Naive<br>(N=13) | Biologic<br>(N=22) | Multiple Biologic<br>(N=17) |
|------------------------|-----------------|--------------------|-----------------------------|
| Safety Follow-Up: CHG  |                 |                    |                             |
| N                      | 7               | 8                  | 10                          |
| Missing                | 6               | 14                 | 7                           |
| Mean (SD)              | -4.5 (5.78)     | -1.7 (3.53)        | -1.7 (3.66)                 |
| Median (Min, Max)      | -3.6 (-16, 1)   | -1.2 (-9, 3)       | -0.5 (-8, 6)                |
| Safety Follow-Up: PCHG |                 |                    |                             |
| N                      | 7               | 8                  | 10                          |
| Missing                | 6               | 14                 | 7                           |
| Mean (SD)              | -29.8 (30.25)   | -10.7 (31.36)      | -12.2 (35.47)               |
| Median (Min, Max)      | -33.3 (-72, 11) | -16.8 (-48, 48)    | -5.8 (-50, 71)              |

Abbreviations: N, number of randomized subjects; n, number of subjects within each category; SD, Standard Deviation; Min, Minimum; Max, Maximum.

Program Name: MUCUS-Shell111-V01  
 Output Location: .\Output\Shared\MUCUS-TFLS-Final-27MAR24-V01.pdf



Table 14.4.1: Time to CD-Related Hospitalization

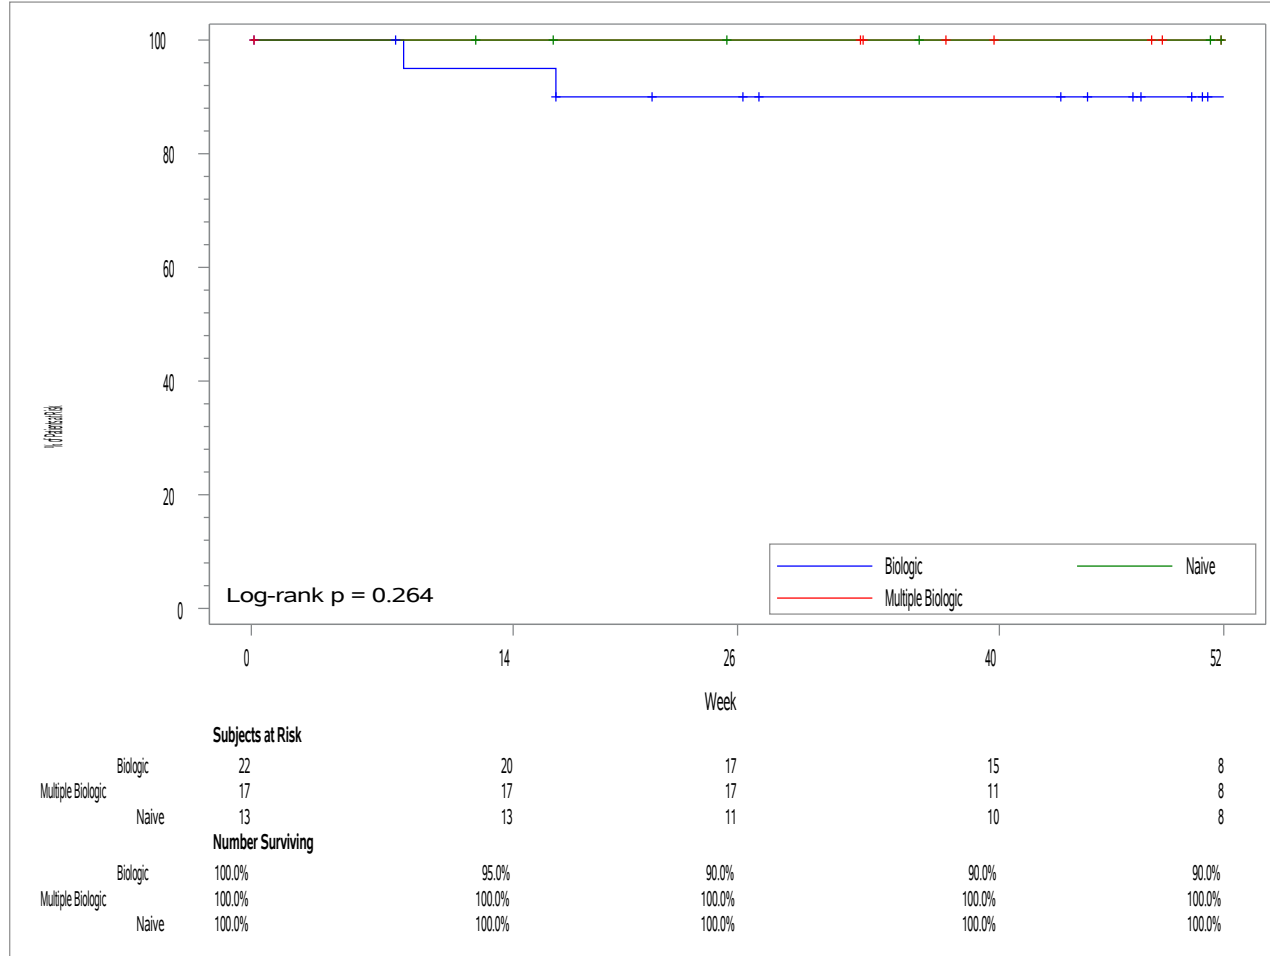

Table 14.4.2: Time to CD-Related Surgery

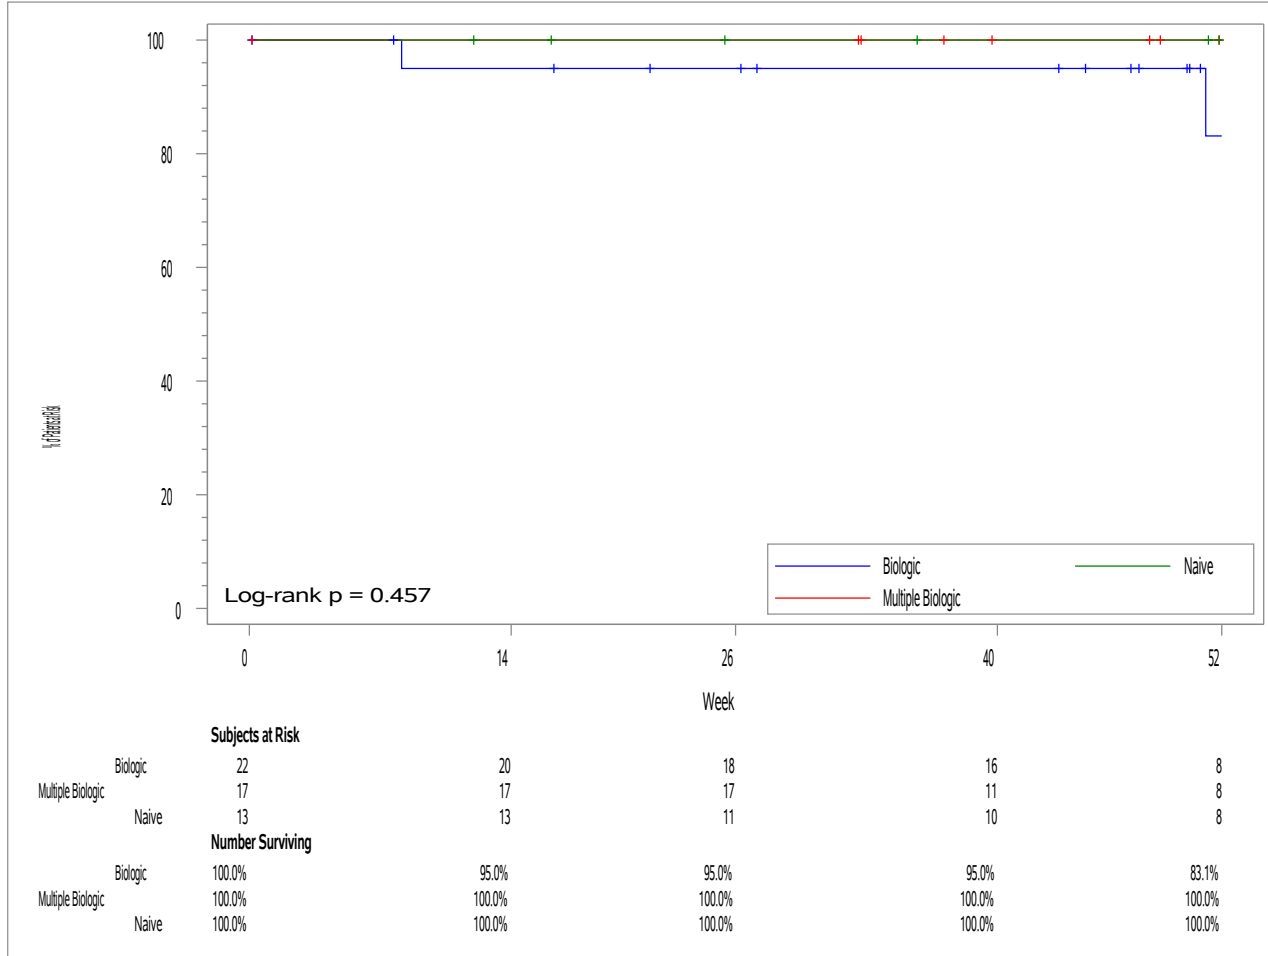

Table 14.4.3: Summary of Clinical Response and Endoscopic Response Exploratory Analysis at Week 52: ITT Population

|                                         | N  | Odds Ratio (95% CI) | P-Value |
|-----------------------------------------|----|---------------------|---------|
| Week 52                                 |    |                     |         |
| Clinical Response + Endoscopic Response |    |                     |         |
| Significant Factor                      |    |                     |         |
| Age                                     | 52 | 0.933(0.873, 0.998) | 0.043   |
| CRP                                     | 52 | 1.014(0.996, 1.032) | 0.124   |

Abbreviations: ITT, Intent-to-Treat Analysis set; N, number of randomized subjects; n, number of subjects within each category;

Outcome definition, Reduction from baseline in SES-CD score  $\geq$  50% and Harvey Bradshaw Index decrease  $\geq$  3 points.

Proc Logistic used to generate Odds Ratios and P-values.

Variables included in the full model: Prior Crohn's Treatment Strata, Age, Sex, Age at diagnosis, disease phenotype, extraintestinal manifestations, C-Reactive Protein, Fecal Calprotectin, Albumin, EuroQoL-5D Health Questionnaire Score.

Variables not significant at the 0.15 level were removed from the model by backwards elimination. Effect estimations for each variable kept in the model after backwards elimination are reported.

Program Name: MUCUS-Shell120-V01

Output Location: .\Output\Shared\MUCUS-TFLS-Final-27MAR24-V01.pdf
